# Supplementary material for: Comparative differential cuproproteomes of Rhodobacter capsulatus reveal novel copper homeostasis related proteins
Source: Royal Society of Chemistry journal article supplement (doi:10.1039/c9mt00314b), 2020-03-02
Supplement: c9mt00314b1.pdf [file c9mt00314b1.pdf]

## Comparative Differential Cuproproteomes of *Rhodobacter capsulatus* Reveal Novel Copper Homeostasis related Proteins

Nur Selamoglu<sup>a</sup>, Özlem Önder<sup>a,b</sup>, Yavuz Öztürk<sup>a,e</sup>, Bahia Khalfaoui-Hassani<sup>a,#</sup>, Crysten E. Blaby-Haas<sup>c</sup>, Benjamin A. Garcia<sup>d</sup>, Hans-Georg Koch<sup>e</sup> and Fevzi Daldal<sup>a\*</sup>

<sup>a</sup>Department of Biology, University of Pennsylvania, Philadelphia, PA, 19104 USA; <sup>b</sup>Department of Pathology and Laboratory Medicine, Perelman School of Medicine, University of Pennsylvania, Philadelphia, PA 19104, USA; <sup>c</sup>Biology Department, Brookhaven National Laboratory, Upton, NY 11973, USA; <sup>d</sup>Department of Biochemistry and Biophysics, Perelman School of Medicine, University of Pennsylvania, Philadelphia, PA 19104, USA, <sup>e</sup>Institute of Biochemistry and Molecular Biology, ZBMZ, Faculty of Medicine, Albert-Ludwigs University of Freiburg, 79104 Freiburg, Germany.

**Running Title:** *Rhodobacter capsulatus* Copper-Responsive Proteome

**Key words:** *Rhodobacter capsulatus* proteome, differential cuproproteomics, copper homeostasis, copper-responsive proteins, uncharacterized proteins.

<sup>#</sup>Present address: IPREM, UMR CNRS 5254, and Université de Pau et des Pays de l'Adour, BP1155 Pau, France

\*Corresponding author: Fevzi Daldal

[fdaldal@sas.upenn.edu](mailto:fdaldal@sas.upenn.edu); +1 215-898-4394

**Files in this Data Supplement:**

Supplemental Information and Table S3 (Excel file)

## SUPPLEMENTAL INFORMATION

### Experimental Procedures

**ProteaseMAX™ Extraction/Trypsin Digestion (protocol B).** Each 100 mg aliquot from the resulting wet pellets was washed with ultrapure water, centrifuged and the supernatant discarded. Solubilization and extraction of proteins was performed using ProteaseMAX™ Surfactant Trypsin Enhancer (Promega Inc.), followed by trypsin digestion as follows (1). The pellet was resuspended in 0.5 ml of ProteaseMAX™ solution (1 mg/ml in 10% acetonitrile and 90% 50mM NH<sub>4</sub>HCO<sub>3</sub>), and 10 min of rigorous vortexing was followed by incubation in a 95 °C water bath for 10 min. Following 15 min of sonication at 4 °C (Bioruptor<sup>®</sup>, Diagenode), the sample was vortexed at room temperature for 30 min. Estimates from separate BCA analysis of similar samples indicated that ~ 400-500 µg protein was solubilized at this stage. Further reduction/alkylation and digestions steps were completed without separating the insolubilized solid fraction. Proteins were reduced by adding dithiothreitol (DTT) to a final concentration of 5mM and incubating for 30 min at 37 °C, and alkylated by adding iodoacetamide to a final concentration of 15 mM and incubating for 30 min at room temperature in the dark. Trypsin (Promega, Sequencing Grade Modified Trypsin) was added to the mixture at a 1/100 w/w ratio of enzyme/protein, and the extract was digested overnight at 37 °C, pH 7. Digested mixtures were vortexed for 10 min and acidified with 10% formic acid to pH 3-4 to halt digestion, vortexed and placed in a 45 °C shaker for 30 min to degrade ProteaseMAX™. Following a 15 min centrifugation at 15,000 x g, the supernatants were removed and dried to completeness in a vacuum centrifuge at 45 °C. The digested peptide samples were resuspended in 50 µL 5% acetonitrile/0.1% formic acid solution, and desalted using ZipTips (Milipore U-C18 P10), eluted, lyophilized and stored at -80 °C. Samples were resuspended in 10 µL (5% acetonitrile/0.1% formic acid) prior to MS analysis.

The efficacy of the extraction/digestion protocols A (thiourea/urea/trypsin/LysC) and B (ProteaseMax/trypsin) was determined using the nano-LC-MS/MS Thermo Orbitrap Velos Pro system described below. Protocol A yielded ~40% more identified proteins than protocol B (1784 versus 1244 in triplicate samples), indicating that the former with multiple digestion steps was more effective than the latter. In addition, a further 15-20% increase in the number of identified proteins was observed when the samples prepared by protocol A were analyzed using the higher sensitivity Q-Exactive MS, rendering it the method of choice for the quantitative aspects of this study. The qualitative data for the protein identification included all datasets, including those treated by the procedure A or B, analyzed using Orbitrap Velos (*c.f.* below) as well as the Q-Exactive MS runs (*c.f.* main text).

**Data acquisition using nano-LC-MS/MS Thermo Orbitrap Velos Pro.** Prepared digests were loaded without pre-fractionation onto a 20 cm column (packed in-house, 75  $\mu$ m ID, 3 $\mu$ m C18, RepoSil-Pur Q18-AQ (Dr.Maisch GmbH)) with buffer A (0.1% formic acid). Peptides were separated and eluted by nano-HPLC (EASY-nLC 1000, Thermo Inc.) using a 85 min linear gradient from 4% to 40% buffer B (0.1% formic acid in acetonitrile), followed by a 20 min linear gradient from 40% to 90% B, followed by 15 min washing with 90% B (flow rate 300 nL/min), and re-equilibration with buffer A. The nLC system was coupled to an Orbitrap Velos Pro mass spectrometer (Thermo Scientific), programmed to acquire spectra in data-dependent mode, with high resolution full survey scans followed by the top 15 most abundant ions fragmented for MS<sup>2</sup> (Thermo Xcalibur 2.2 software). The resolution for full MS scans (300-2000 m/z) was 60,000 (at 400 m/z) and dual lock mass was enabled with 371.101233 m/z and 445.120024 m/z polysiloxane background ions. The 15 most intense ions were selected for fragmentation by collision induced

dissociation (CID) with collision energy set at 35%, and with dynamic exclusion enabled to minimize repeat fragmentation (repeat count: 3, repeat duration: 30 sec, exclusion duration: 90 sec; exclusion list: 500). Unassigned charge states and singly charged species were rejected. The raw data were analyzed as described in the main text.

## REFERENCES

1. Pirmoradian, M., Budamgunta, H., Chingin, K., Zhang, B., Astorga-Wells, J., and Zubarev, R. A. (2013) Rapid and deep human proteome analysis by single-dimension shotgun proteomics. *Mol Cell Proteomics* **12**, 3330-3338
2. Sambrook, J., and Russell, D. W. (2001) *Molecular Cloning: a laboratory manual*, 3rd ed. ed., Cold Spring harbor Laboratory Press, Cold Spring harbor
3. Simon, R., Priefer, U., and Puhler, A. (1983) A Broad Host Range Mobilization System for In vivo Genetic-Engineering - Transposon Mutagenesis in Gram-Negative Bacteria. *Bio-Technology* **1**, 784-791
4. Zannoni, D., Prince, R. C., Dutton, P. L., and Marrs, B. L. (1980) Isolation and Characterization of a Cytochrome *c*<sub>2</sub>-Deficient Mutant of *Rhodopseudomonas-capsulata*. *Febs Letters* **113**, 289-293
5. Yen, H. C., Hu, N. T., and Marrs, B. L. (1979) Characterization of the gene transfer agent made by an overproducer mutant of *Rhodopseudomonas capsulata*. *J Mol Biol* **131**, 157-168
6. Ditta, G., Schmidhauser, T., Yakobson, E., Lu, P., Liang, X. W., Finlay, D. R., Guiney, D., and Helinski, D. R. (1985) Plasmids related to the broad host range vector, pRK290, useful for gene cloning and for monitoring gene expression. *Plasmid* **13**, 149-153
7. Brimacombe, C. A., Stevens, A., Jun, D., Mercer, R., Lang, A. S., and Beatty, J. T. (2013) Quorum-sensing regulation of a capsular polysaccharide receptor for the *Rhodobacter capsulatus* gene transfer agent (RcGTA). *Mol Microbiol* **87**, 802-817
8. S. Ekici, S. Turkarslan, G. Pawlik, A. Dancis, N. S. Baliga, H. G. Koch and F. Daldal, Intracytoplasmic copper homeostasis controls cytochrome *c* oxidase production, *MBio*, 2014, **5**, e01055-01013.
9. Y. Zhang, C. E. Blaby-Haas, S. Steimle, A. F. Verissimo, V. A. Garcia-Angulo, H. G. Koch, F. Daldal and B. Khalfaoui-Hassani, Cu Transport by the Extended Family of CcoA-like Transporters (CalT) in Proteobacteria, *Sci Rep*, 2019, **9**, 1208.

**Table S1. Strains and plasmids used in this work.**

| <b>Strain or plasmid</b> | <b>Description</b>                                                                                                   | <b>Phenotype</b>              | <b>Reference</b> |
|--------------------------|----------------------------------------------------------------------------------------------------------------------|-------------------------------|------------------|
| <i>Strains</i>           |                                                                                                                      |                               |                  |
| <i>E. coli</i>           |                                                                                                                      |                               |                  |
| HB101                    | F <sup>-</sup> $\Delta(gpt-proA)62 leuB6 supE44 ara-14 galK2 lacY1$                                                  | Str <sup>r</sup>              | (2)              |
| S17-1                    | $\Delta(mcrC-mrr) rpsL20$ (Str <sup>R</sup> ) <i>xyl-5 mtl-1recA13</i><br><i>recA pro hsdR, RP4(Tc::Mu, Km::Tn7)</i> |                               | (3)              |
| <i>R. capsulatus</i>     |                                                                                                                      |                               |                  |
| <sup>a</sup> MT1131      | <i>crtD121</i>                                                                                                       | wild type (Rif <sup>r</sup> ) | (4)              |
| Y262                     | GTA overproducer                                                                                                     |                               | (5)              |
| YO- $\Delta$ 00098       | $\Delta(rcc00098)$                                                                                                   | In-frame, markerless          | This work        |
| YO- $\Delta$ 00738       | $\Delta(rcc00738::Gm)$                                                                                               | Gm <sup>r</sup>               | This work        |
| YO- $\Delta$ 00885       | $\Delta(rcc00891-rcc00885::Gm)$                                                                                      | Gm <sup>r</sup>               | This work        |
| YO- $\Delta$ 01027       | $\Delta(rcc01027-rcc01031::Gm)$                                                                                      | Gm <sup>r</sup> ,             | This work        |
| YO- $\Delta$ 01423Su     | $\Delta(rcc01423)$                                                                                                   | In-frame, markerless          | This work        |
| YO- $\Delta$ 01423       | $\Delta(rcc01423::Gm)$                                                                                               | Gm <sup>r</sup>               | This work        |
| YO- $\Delta$ 01445       | $\Delta(rcc01445::Gm)$                                                                                               | Gm <sup>r</sup>               | This work        |
| YO- $\Delta$ 02109       | $\Delta(rcc02109::Gm)$                                                                                               | Gm <sup>r</sup>               | This work        |

|                 |                                                                                                           |                                    |           |
|-----------------|-----------------------------------------------------------------------------------------------------------|------------------------------------|-----------|
| YO-Δ02111       | $\Delta ( rcc02111 )$                                                                                     | In-frame, markerless               | This work |
| YO-Δ03065       | $\Delta( rcc03065- rcc03067:: Gm )$                                                                       | Gm <sup>r</sup>                    | This work |
| <b>Plasmids</b> |                                                                                                           |                                    |           |
| pRK2013         | Conjugation helper                                                                                        | Kan <sup>r</sup>                   | (6)       |
| pRK415          | Broad host-range vector                                                                                   | Tet <sup>r</sup>                   | (6)       |
| pZDJ            | Puc promoter replaced with <i>tetA</i> promoter on the suicide plasmid pZJD29a                            | <i>sacB</i> , Gm <sup>R</sup>      | (7)       |
| pYO98           | $\Delta( rcc01423:: Gm )$ on pRK415                                                                       | Gm <sup>r</sup>                    | This work |
| pYO-Δ00738      | $\Delta( rcc00738:: Gm )$ on pRK415                                                                       | Tet <sup>r</sup>                   | This work |
| pYO-Δ00885      | $\Delta( rcc00891- rcc00885:: Gm )$ on pRK415                                                             | Tet <sup>r</sup> , Gm <sup>r</sup> | This work |
| pYO-Δ01027      | $\Delta( rcc01027- rcc01031:: Gm )$ on pRK415                                                             | Tet <sup>r</sup> , Gm <sup>r</sup> | This work |
| pYO-Δ01445      | $\Delta( rcc01445:: Gm )$ on pRK415                                                                       | Tet <sup>r</sup> , Gm <sup>r</sup> | This work |
| pYO-Δ03065      | $\Delta( rcc03065- rcc03067:: Gm )$ on pRK415                                                             | Tet <sup>r</sup> , Gm <sup>r</sup> | This work |
| pYO-Δ02109      | $\Delta( rcc02109:: Gm )$ on pRK415                                                                       | Tet <sup>r</sup> , Gm <sup>r</sup> | This work |
| pYO97           | $\Delta( rcc01423 )$ on pZDJ; in-frame deletion of <i>rcc01423</i> without its first 4 and last 4 codons. | Gm <sup>r</sup>                    | This work |
| pYO-Δ00098      | $\Delta( rcc00098 )$ on pZDJ; in-frame deletion of <i>rcc02111</i> without its first 4 and last 4 codons. | Gm <sup>r</sup>                    | This work |
| pYO-Δ02111Su    | $\Delta( rcc02111 )$ on pZDJ; in-frame deletion of <i>rcc02111</i> without its first 4 and last 4 codons. | Gm <sup>r</sup>                    | This work |

<sup>a</sup>*R.capsulatus* strain MT1131 is derived from SB1003 in multiple steps, as described in Zannoni *et al.* (1980): first a Ps-deficient mutant (TL1) was obtained using tetracycline suicide, then its *crtD* derivative was constructed by GTA cross to yield MT113, and then its Ps-proficient derivative was obtained via a second GTA cross.

**Table S2. Primers used in this work.**

|                   |                                                               |
|-------------------|---------------------------------------------------------------|
| <b>Gm-F</b>       | <b>5-AAGCTTGTCGACCCGATCTGAGC-5</b>                            |
| <b>Gm-R</b>       | 5- TCTAGAACTAGTGGATCCCCCG-3                                   |
| <b>01423-F1</b>   | 5-CGGCCAGTGAATTCGAGCTCGGTACATGCGCAGGGTATAGGTGACGCC-3          |
| <b>01423-R1</b>   | 5-TCATTTTTCGAACTGCGGGTGGCTCCAGGCGTTTTTCTTCTTCGAAGTGCC-3       |
| <b>01423-F2</b>   | 5-GAGCCACCCGCAGTTCGAAAAATGATCCGACTTCGCAAGCCAGGTCC-3           |
| <b>01423-R2</b>   | 5-AAGCTTGCATGCCTGCAGGTGCGACTGCGATCGTCTTTGCCGATCTGGC-3         |
| <b>01423Gm-R1</b> | 5-GAAAATGGCTCAGATCGGGTTCGACAAGCTTAAGTGGCAGACATGACATGTCTCC-3   |
| <b>01423Gm-F3</b> | 5-TTCCCGGCCGGGGGATCCACTAGTTCTAGAGAAGAAAACGCCTGATCCGACTTCG -3  |
| <b>01423Su-F1</b> | 5-TACGCCAAGCTTGCATGCCTGCAGGGTCTGTTGCGCCAGCACGGCTTTGC-3        |
| <b>01423Su-R1</b> | 5-AGTGGCAGACATGACATGTCTCCTC-3                                 |
| <b>01423Su-F2</b> | 5-GAGGAGACATGTCATGTCTGCCACTGAAGAAAACGCCTGATCCGACTTCG-3        |
| <b>01423Su-R2</b> | 5-AAACGACGGCCAGTGAATTCGAGCTGGCGACGGACAATTGCCGGGGCTG-3         |
| <b>00738-F1</b>   | 5-CGGCCAGTGAATTCGAGCTCGGTACACTGCGCCAAGACCTGCCCAAGG-3          |
| <b>00738-R1</b>   | 5-AAAAATGGCTCAGATCGGGTTCGACAAGCTTAGACGATGCGGAAGAAGCAGCCCCG -3 |
| <b>00738-F2</b>   | 5-TTCCCGGCCGGGGGATCCACTAGTTCTAGAGATCTGGGCGGCGCGCTCTCGGC-3     |
| <b>00738-R2</b>   | 5-AAGCTTGCATGCCTGCAGGTGCGACTTGACCATGCTGCTGGAAGACGAC-3         |
| <b>00891-F1</b>   | 5-CGGCCAGTGAATTCGAGCTCGGTACAGATGGTGATCCGCGCCATCGCG-3          |
| <b>00891-R1</b>   | 5-AAAAATGGCTCAGATCGGGTTCGACAAGCTTCGCCGAGGCCGAGAGATGTTCCG -3   |
| <b>00885-F2</b>   | 5-TTCCCGGCCGGGGGATCCACTAGTTCTAGAACCCGAACCATCACTGCCCTTCTG-3    |
| <b>00885-R2</b>   | 5-AAGCTTGCATGCCTGCAGGTGCGACTACGCCGCCGGATGGCATTCAAAGG-3        |
| <b>01027-F1</b>   | 5-CGGCCAGTGAATTCGAGCTCGGTACCCGCCCGAAAGCGCCAGAAGCGC-3          |
| <b>01027-R1</b>   | 5-AAAAATGGCTCAGATCGGGTTCGACAAGCTTGCTGCCCGTAGGCGTCGGCAACC-3    |
| <b>01031-F2</b>   | 5-TTCCCGGCCGGGGGATCCACTAGTTCTAGAGCCGACCGGGTTCTGGTGCTGGC-3     |
| <b>01031-R2</b>   | 5-AAGCTTGCATGCCTGCAGGTGCGACTGCGATCGCGCAATTCGGCCTTGGC-3        |
| <b>02111Su-F1</b> | 5-TACGCCAAGCTTGCATGCCTGCAGGATCGAGCTGTGGCAGGTGATGCGC-3         |
| <b>02111Su-R1</b> | 5-CAGAATCCGCATGGGAGGAGCATGGC-3                                |
| <b>02111Su-F2</b> | 5-CCATGCTCCTCCCATGCGGATTCTGCCGCCCGCCTCTGATCTTCGCC-3           |
| <b>02111Su-R2</b> | 5-AAACGACGGCCAGTGAATTCGAGCTGGCAGCGGCACCACCGGGTTGCC-3          |
| <b>02109-R1</b>   | 5-AAAAATGGCTCAGATCGGGTTCGACAAGCTTAAGGCACCCGGCGACAAGGGCC-3     |



**02109-F2** 5-TTCCCGGCCGGGGGATCCACTAGTTCTAGACTGATCACGGCGGACGGGCAAACC-3  
**02109-R2** 5-AAGCTTGCATGCCTGCAGGTTCGACTGTTCTAACCTTAGGCCGCCAGAC-3  
**00098Su-F1** 5-TACGCCAAGCTTGCATGCCTGCAGGCGACGCTGGGCCTTGACCCGGAG-3  
**00098Su-R1** 5-AAGGCGGCATGGGTGTCTCCAG-3  
**00098Su-F2** 5-ACTGGAGACACCCATGCGCCGCCTTATCCGTTTCTGAGATCCGTTTCC-3  
**00098Su-R2** 5-AAACGACGGCCAGTGAATTCGAGCTTCGTCCATGCGCAGATGCAGATC-3  
**01445-F1** 5-CGGCCAGTGAATTCGAGCTCGGTACCGCTGGTGGCAGAACCGATCAGC-3  
**01445-R1** 5-AAAAATGGCTCAGATCGGGTCGACAAGCTTGGTGATGACGATCGTGCCCAGCG-3  
**01445-F2** 5-TTCCCGGCCGGGGGATCCACTAGTTCTAGAGACGGCGCTTTTGATCGACGCGC-3  
**01445-R2** 5-AAGCTTGCATGCCTGCAGGTTCGACTTGGCATGGATGCGATGCTGATCG-3  
**03065-F1** 5-CGGCCAGTGAATTCGAGCTCGGTACTCCAGCGGCAGATGCGTGGCGGC-5  
**03065-R1** 5-AAAAATGGCTCAGATCGGGTCGACAAGCTTCGGCGGCGCGCATCCAGAACACC-3  
**03067-F2** 5-TTCCCGGCCGGGGGATCCACTAGTTCTAGATTCGGCCCGATGGTCGAGGACCGC-3  
**03067-R2** 5-AAGCTTGCATGCCTGCAGGTTCGACTCCAGCCGATGCGCGATGACATTTCG-3

**Table S3. Excel spreadsheet compiled datasets.** Data related to the identification, annotations, quantitation and statistics of *R. capsulatus* proteins are cumulated in **Table S3. Sheet 1 (*R. capsulatus* Proteins)**: Full genome listing of *R. capsulatus* (3632 entries, UniprotKB). Various annotations are included: PsortB localizations, TIGRFAM and TIGR roles, GO annotations, Interpro, and KEGG classifications, as well as protein identifiers. Those proteins experimentally identified in the current study are marked with asterisks (first column), and those unidentified are designated in gray colored rows. **Sheet 2 (Identified Proteins)**: Proteins experimentally identified in the current study (2430 entries), with the number of unique peptides, MS/MS counts and sequence coverage listed along with other information. **Sheet 3 (Unidentified Proteins)**: Proteins unidentified in the present study are listed along with functional annotations where available. **Sheet 4 (Single Peptide-ID)**: List of proteins identified with only one unique peptide (59 entries). Those proteins identified with single MS/MS spectra are highlighted in yellow (13 entries). Annotated spectra for all single peptides are provided in **Figure S4**. **Sheet 5 (Quantified-Statistics)**: The 1926 proteins quantified in this study are listed, along with T-test p-values and Fold-changes for +Cu vs control and for +BCS vs control (see Experimental Procedures). The 75 proteins that were significantly affected by changes in Cu levels (i.e., surpassed the criteria of  $p < 0.05$  and  $FC > 2.0$ ) are highlighted as noted in the table headings.

## Supplemental FIGURES

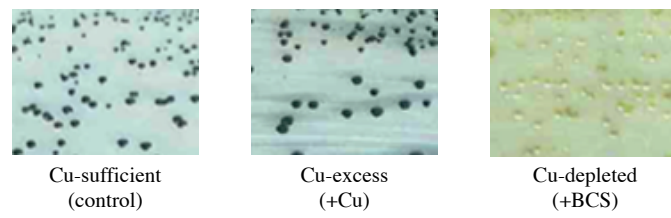

*Figure S1. Selamoglu et al.*

**Figure S1. Nadi staining of *R. capsulatus* colonies grown under different Cu concentrations.** Cu-sufficient (control), Cu-excess (+Cu) and Cu-depleted (+BCS) refer to MedA medium containing 0.3  $\mu\text{M}$  Cu, 5  $\mu\text{M}$  Cu and 5mM BCS, respectively.

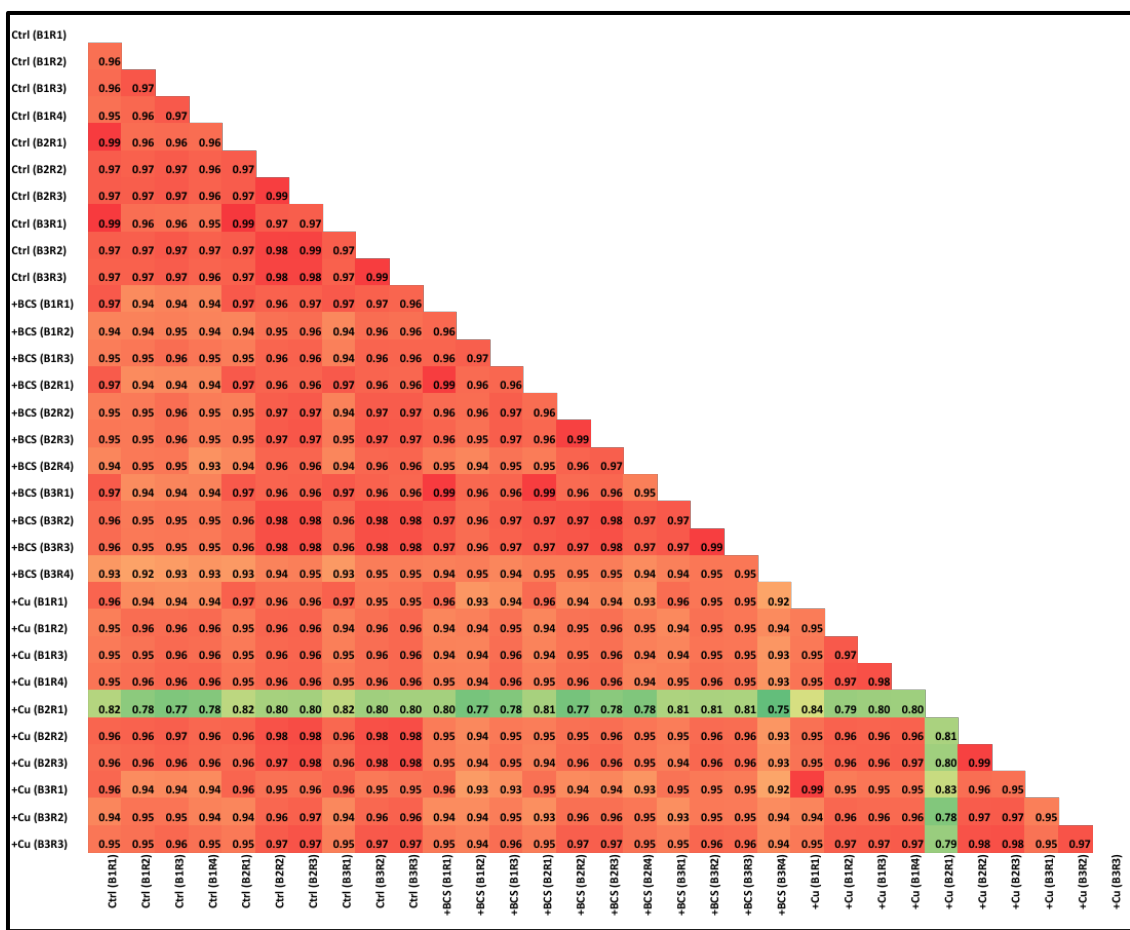

**Figure S2. Pearson correlation for individual experimental runs.** Color-coded Pearson r-values are shown for the 31 individual runs using lysis/digestion protocol A and Q-Exactive mass spectrometer (Experimental Procedures). The samples are identified by Cu condition (Ctrl, +Cu and +BCS), biological repeat (B1, B2, B3) and technical repeat (R1, R2, R3, R4). All r values were consistently high, within 0.92 to 0.99, except the sample +Cu(B2R1) that had r-values between 0.75-0.83 and was subsequently discarded.

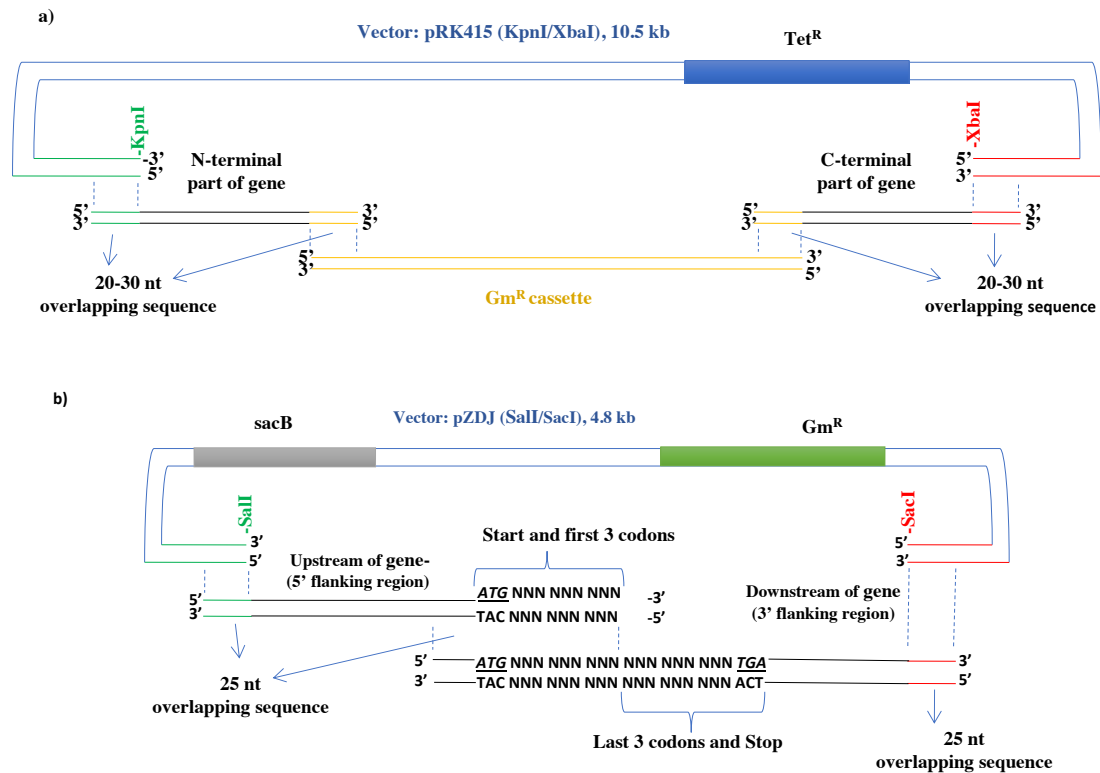

Figure S3. Selamoglu et al.

**Figure S3. The NEBuilder HiFi DNA Assembly Method.** (a) the version used for GTA mediated chromosomal inactivation, and (b) that used for construction of chromosomal in-frame seamless deletions of *R. capsulatus* chromosomal genes. The dotted lines indicate the overlapping regions between the vector arms and the DNA fragments being inserted.

**Figure S4.** Annotated spectra corresponding to proteins identified by a single unique peptide (see Sheet 4 (Single Peptide-ID) in **Table S3**).

NCAP\_1000015.DSARDO.HHHEI  
 membrane transport permease

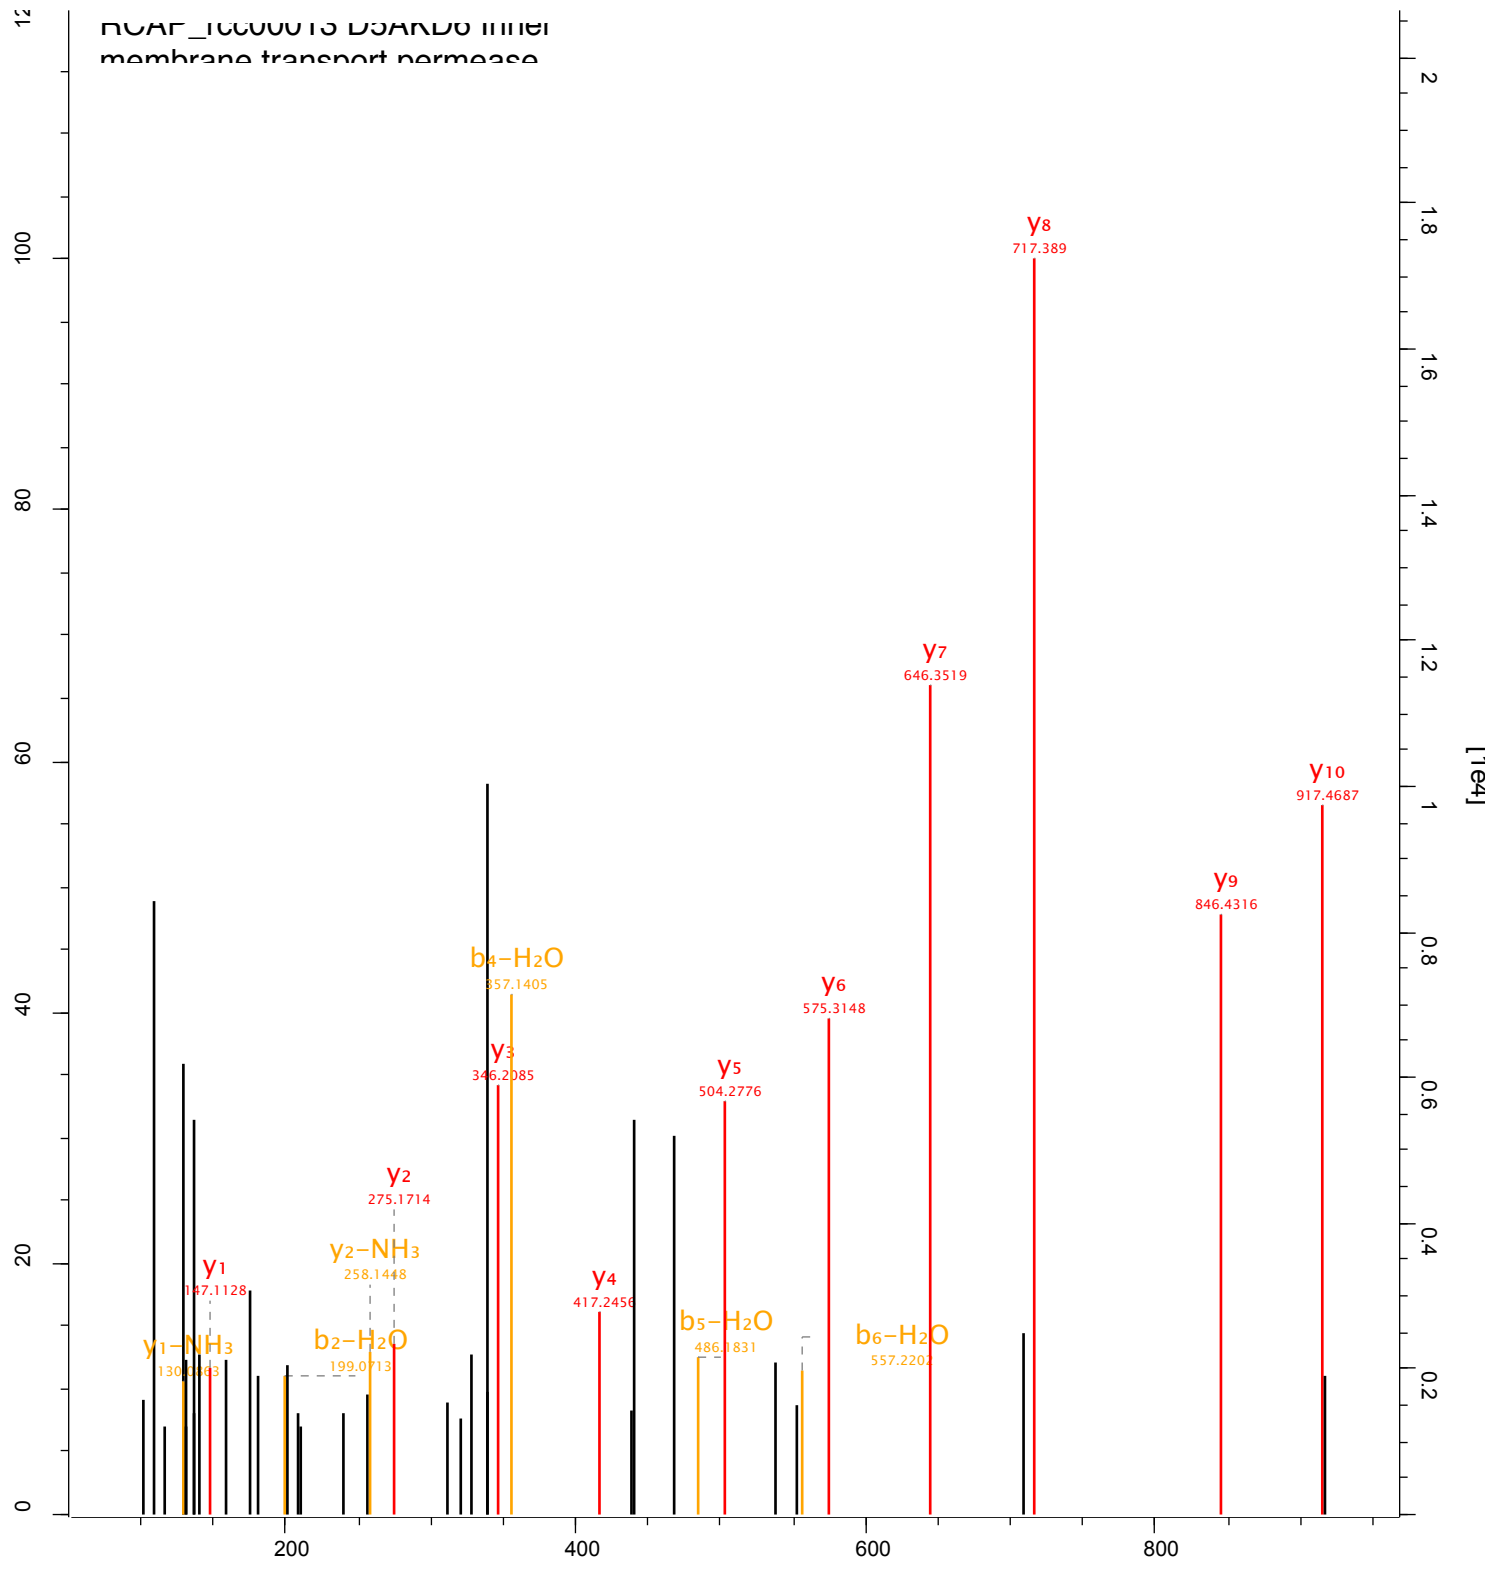

- E S G T E A E A A A S A A Q K -

y10
y9
y8
y7
y6
y5
y4
y3
y2
y1

RCAP\_rcc00270 D5ALH9 Lipoprotein signal peptidase

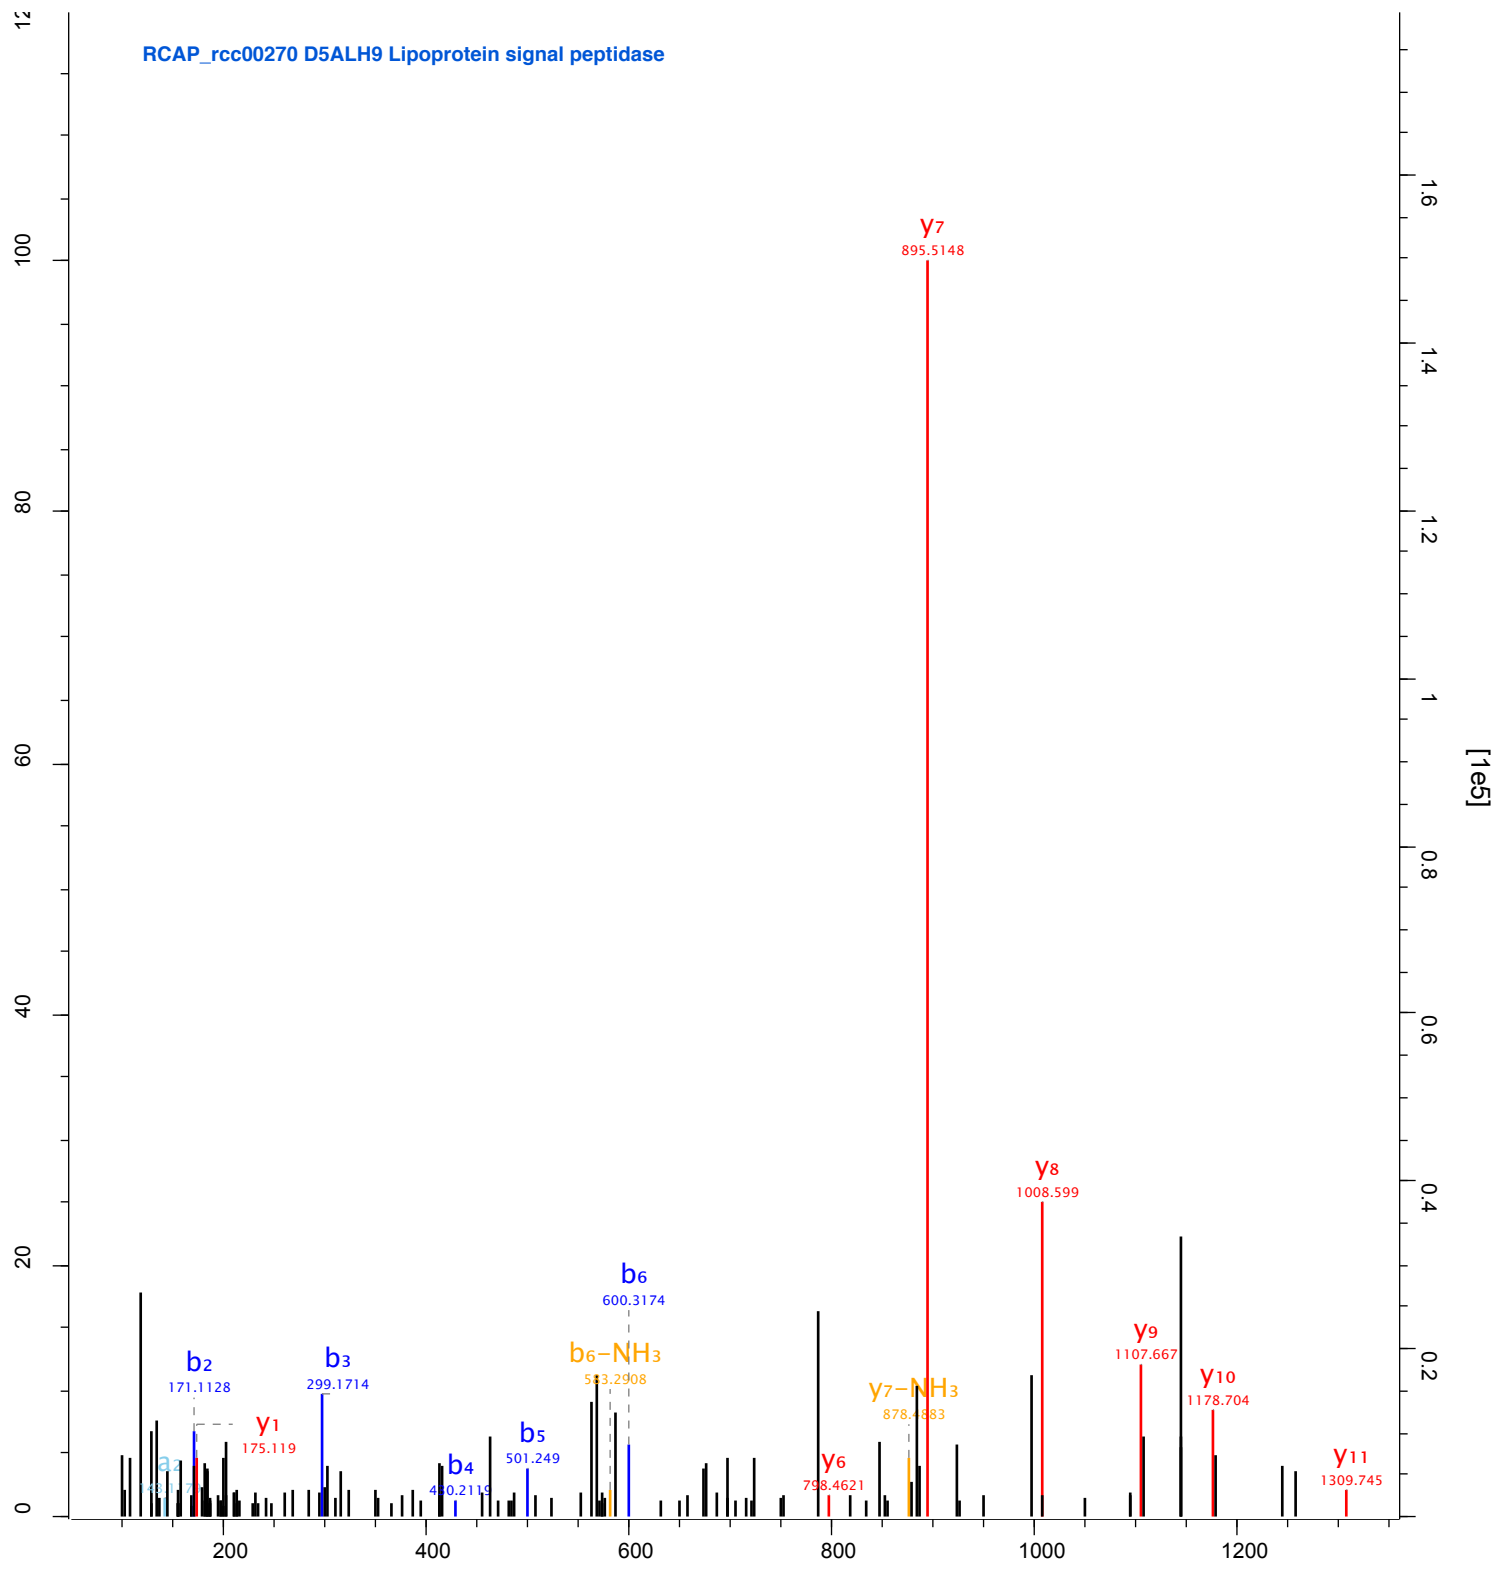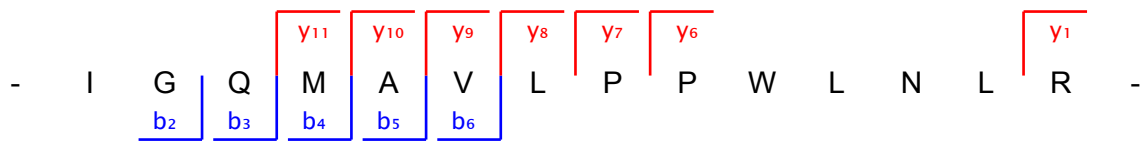



MT1131-minusCu-plusBC-Set2-02

33683

FTMS; HCD

215.14

636.86

## RCAP\_rcc00285 D5ALY0 Protein translocase subunit SecE

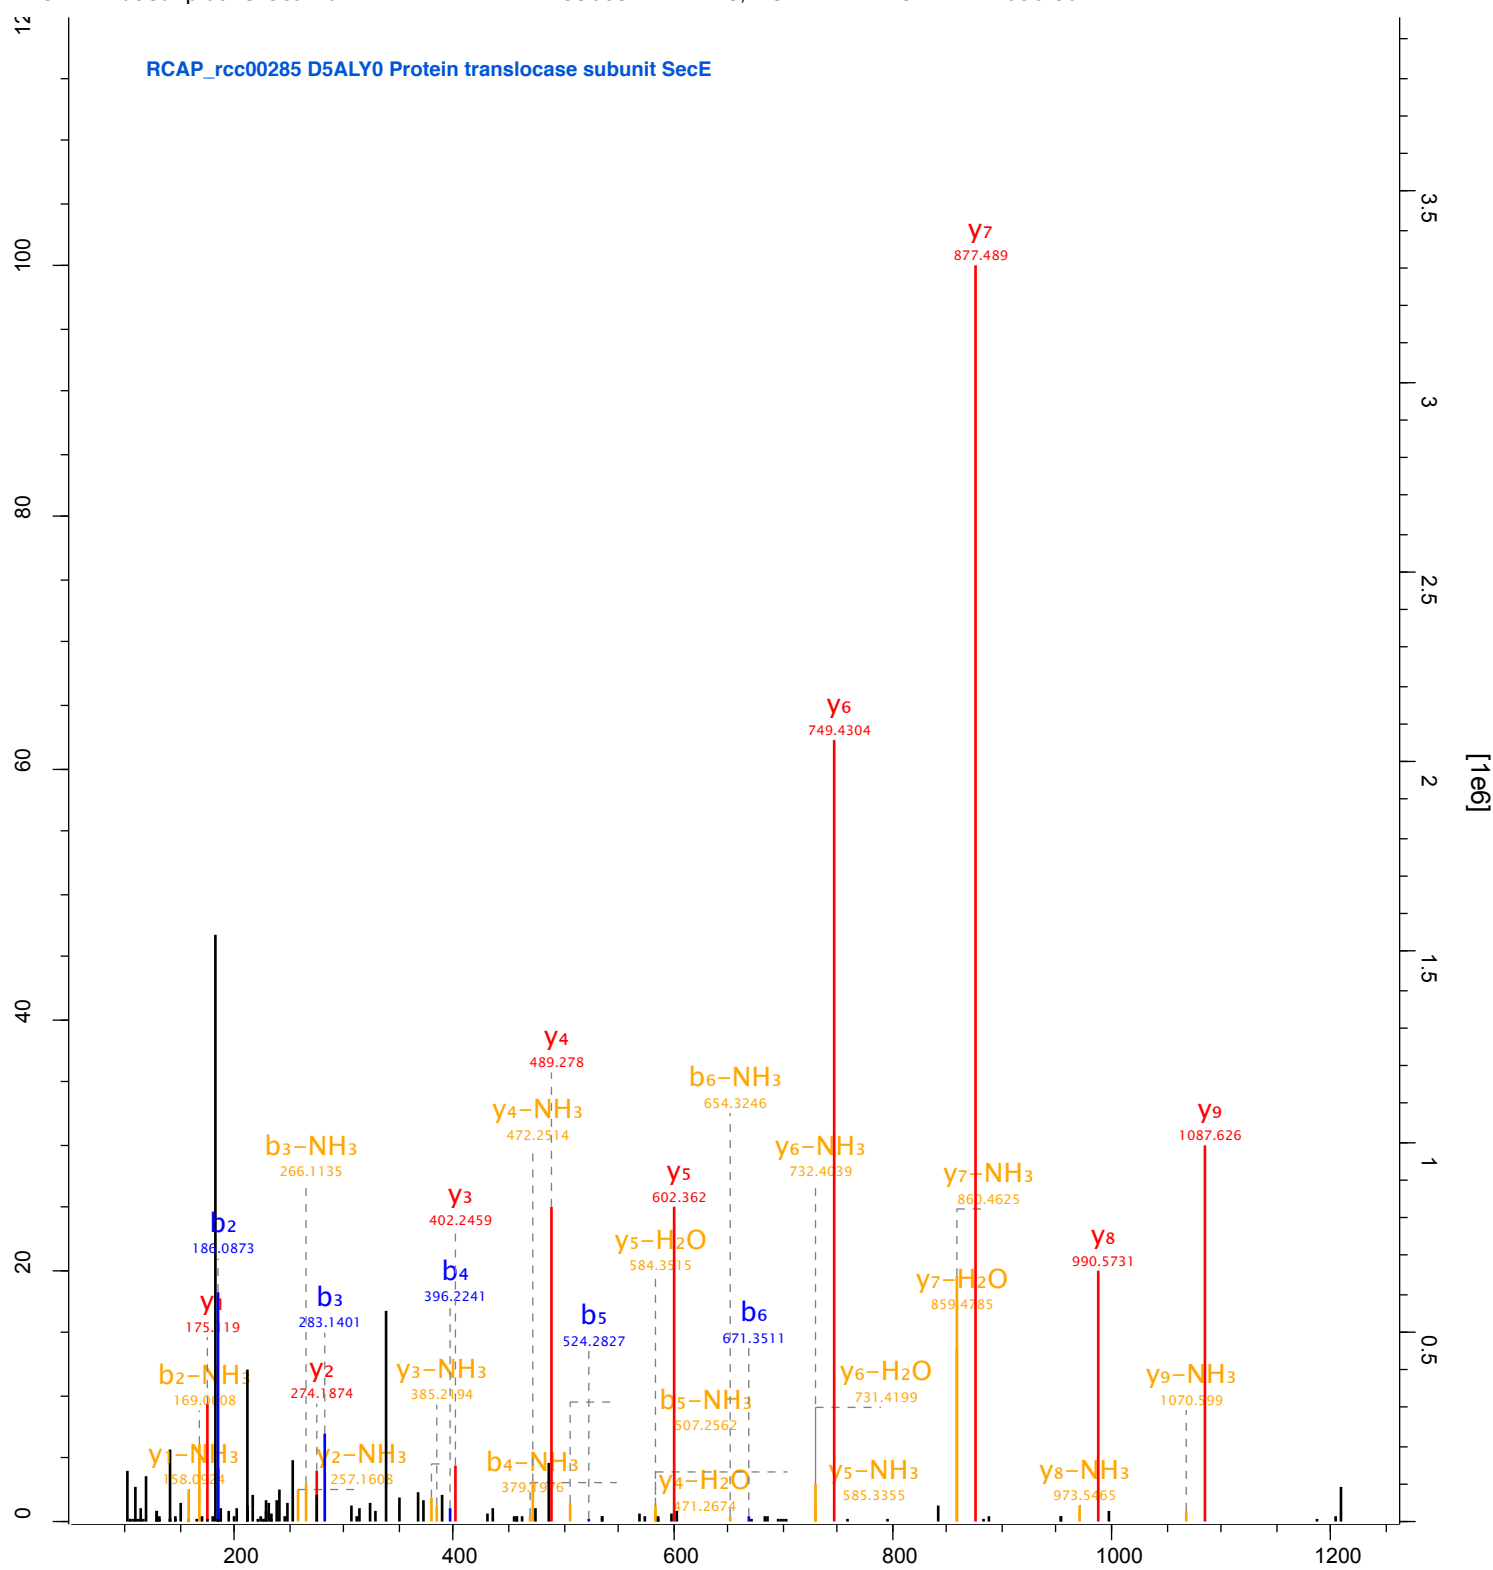

- A N P I Q F L S Q V R -

b<sub>2</sub> b<sub>3</sub> b<sub>4</sub> b<sub>5</sub> b<sub>6</sub>

y<sub>9</sub> y<sub>8</sub> y<sub>7</sub> y<sub>6</sub> y<sub>5</sub> y<sub>4</sub> y<sub>3</sub> y<sub>2</sub> y<sub>1</sub>

RCAP\_rcc00423 D5AMP9 Uncharacterized protein

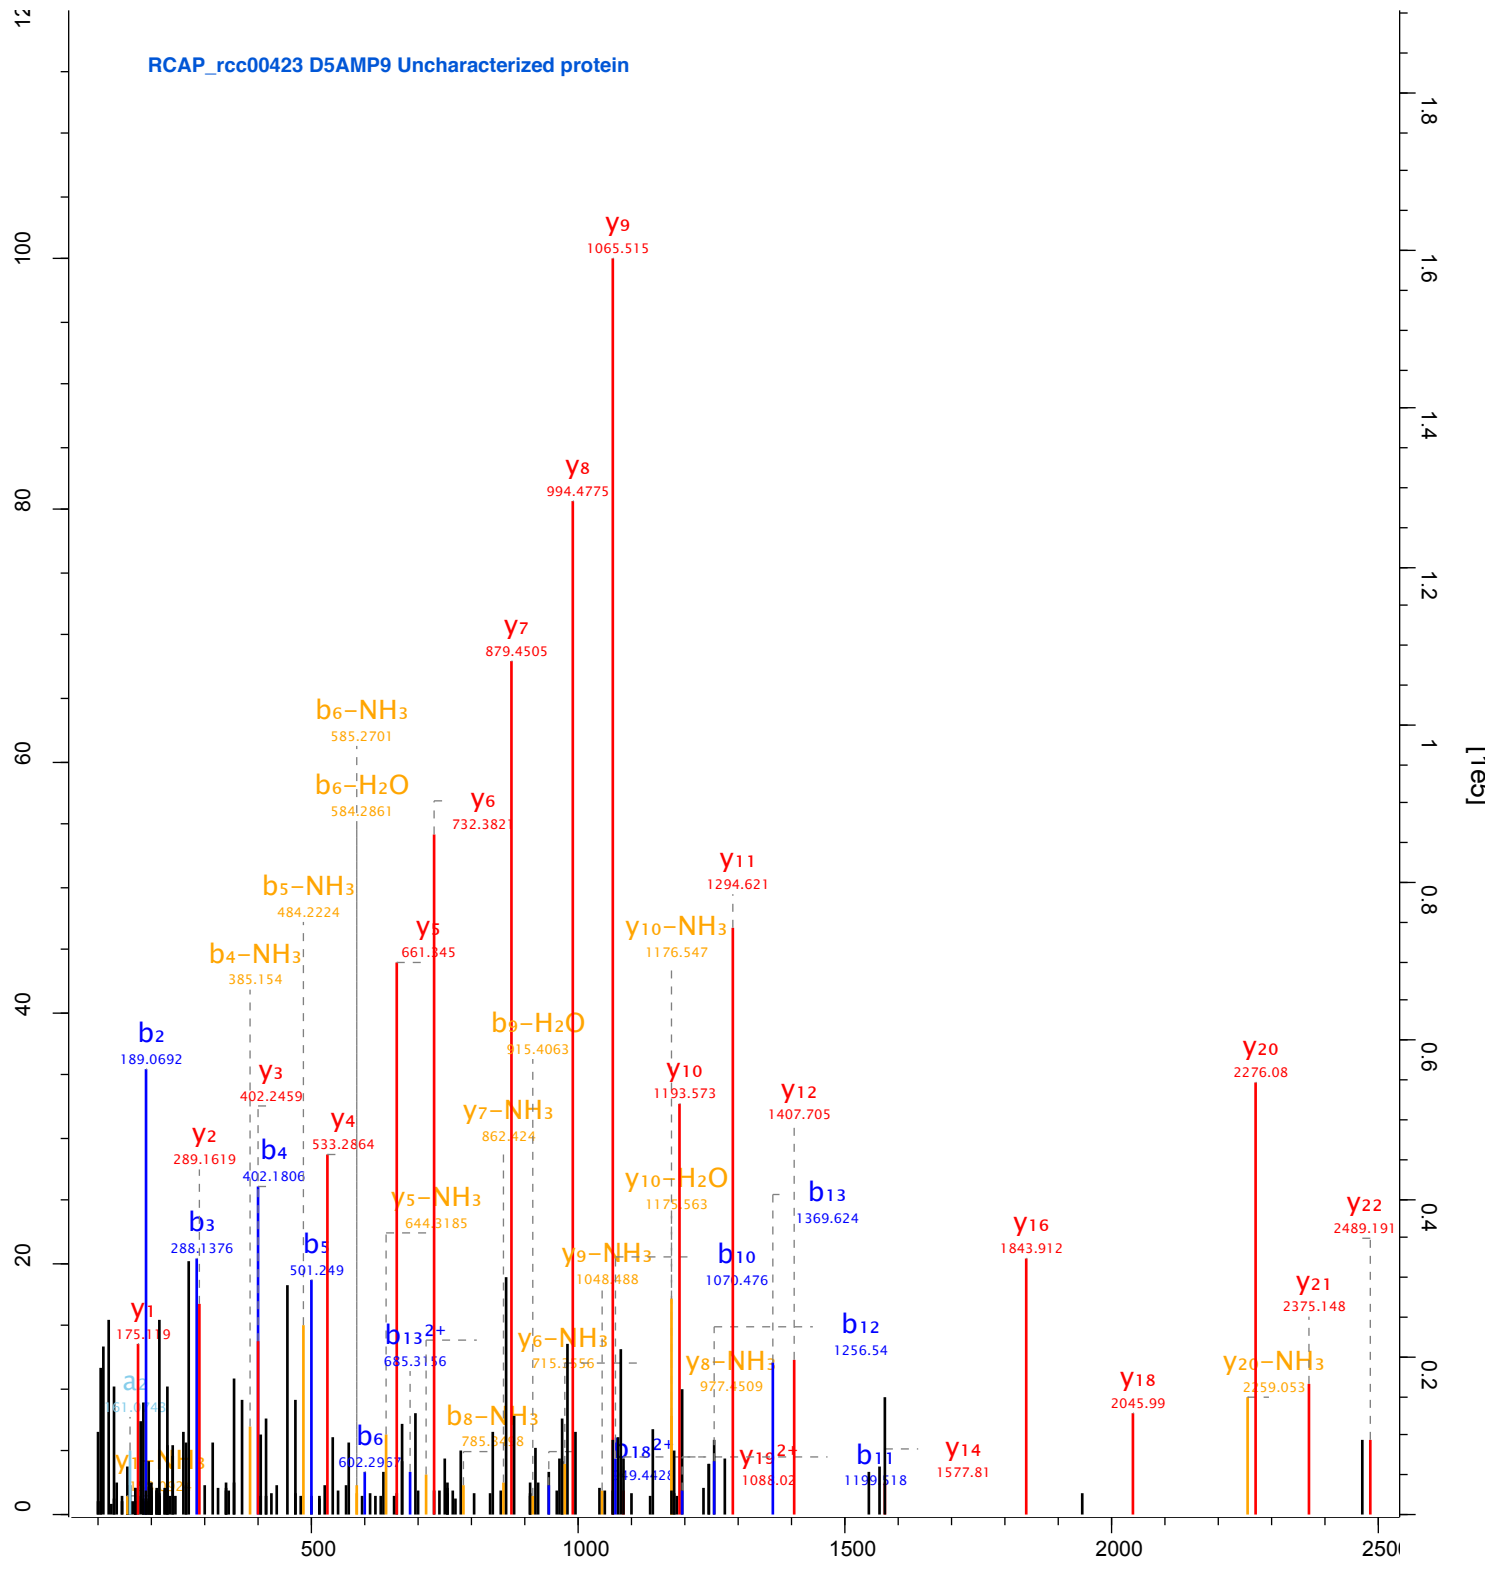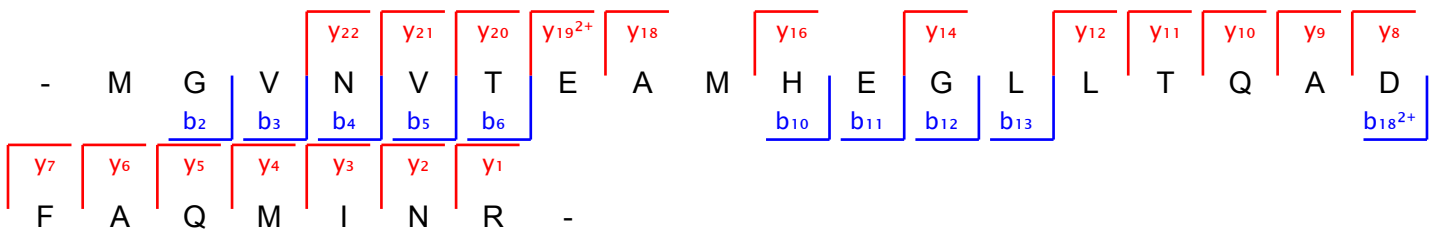

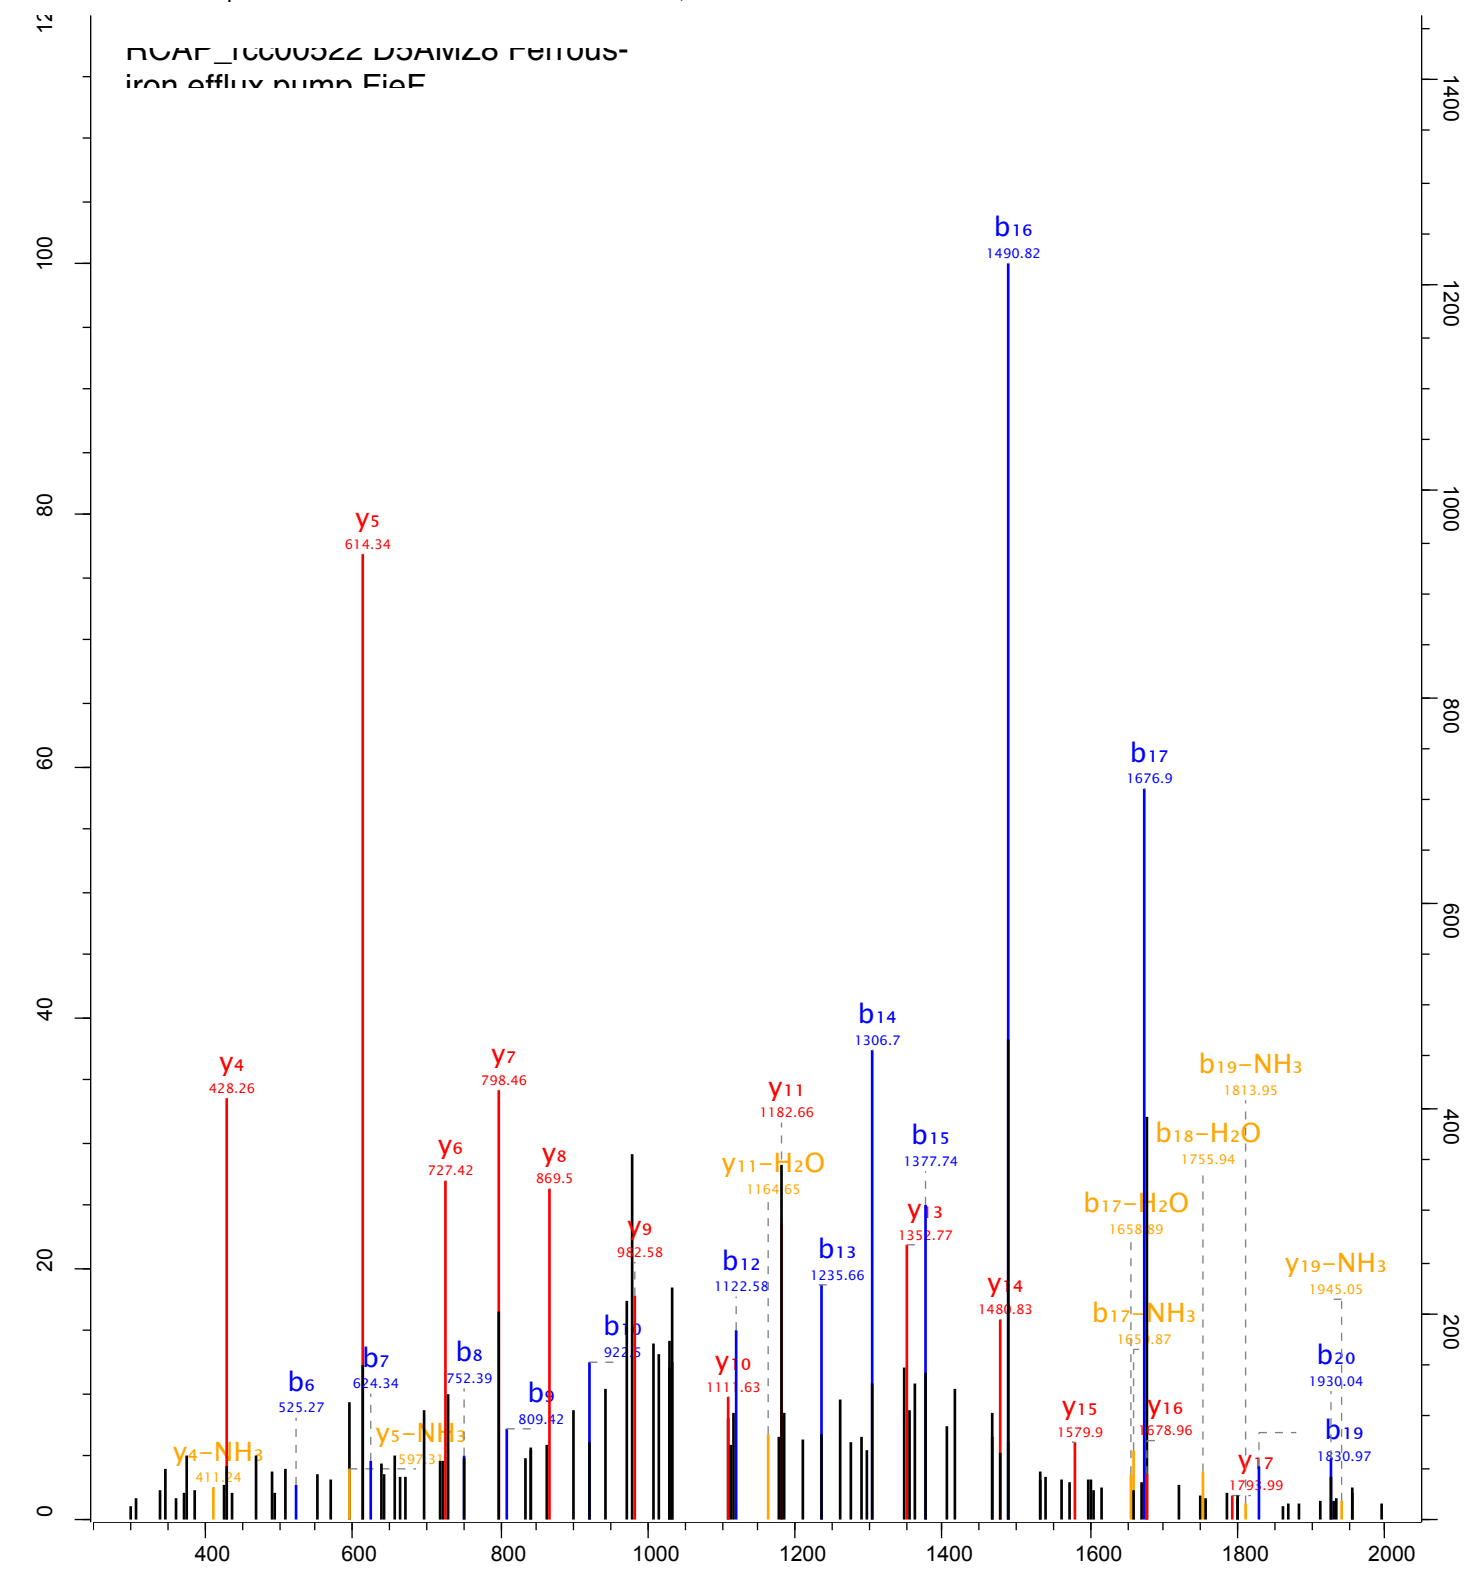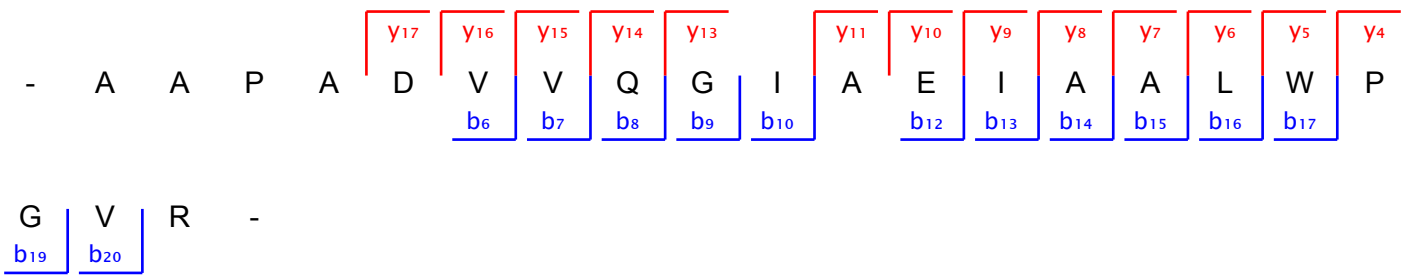

NCAT\_1000055 DJANF4 ABC transporter permease protein

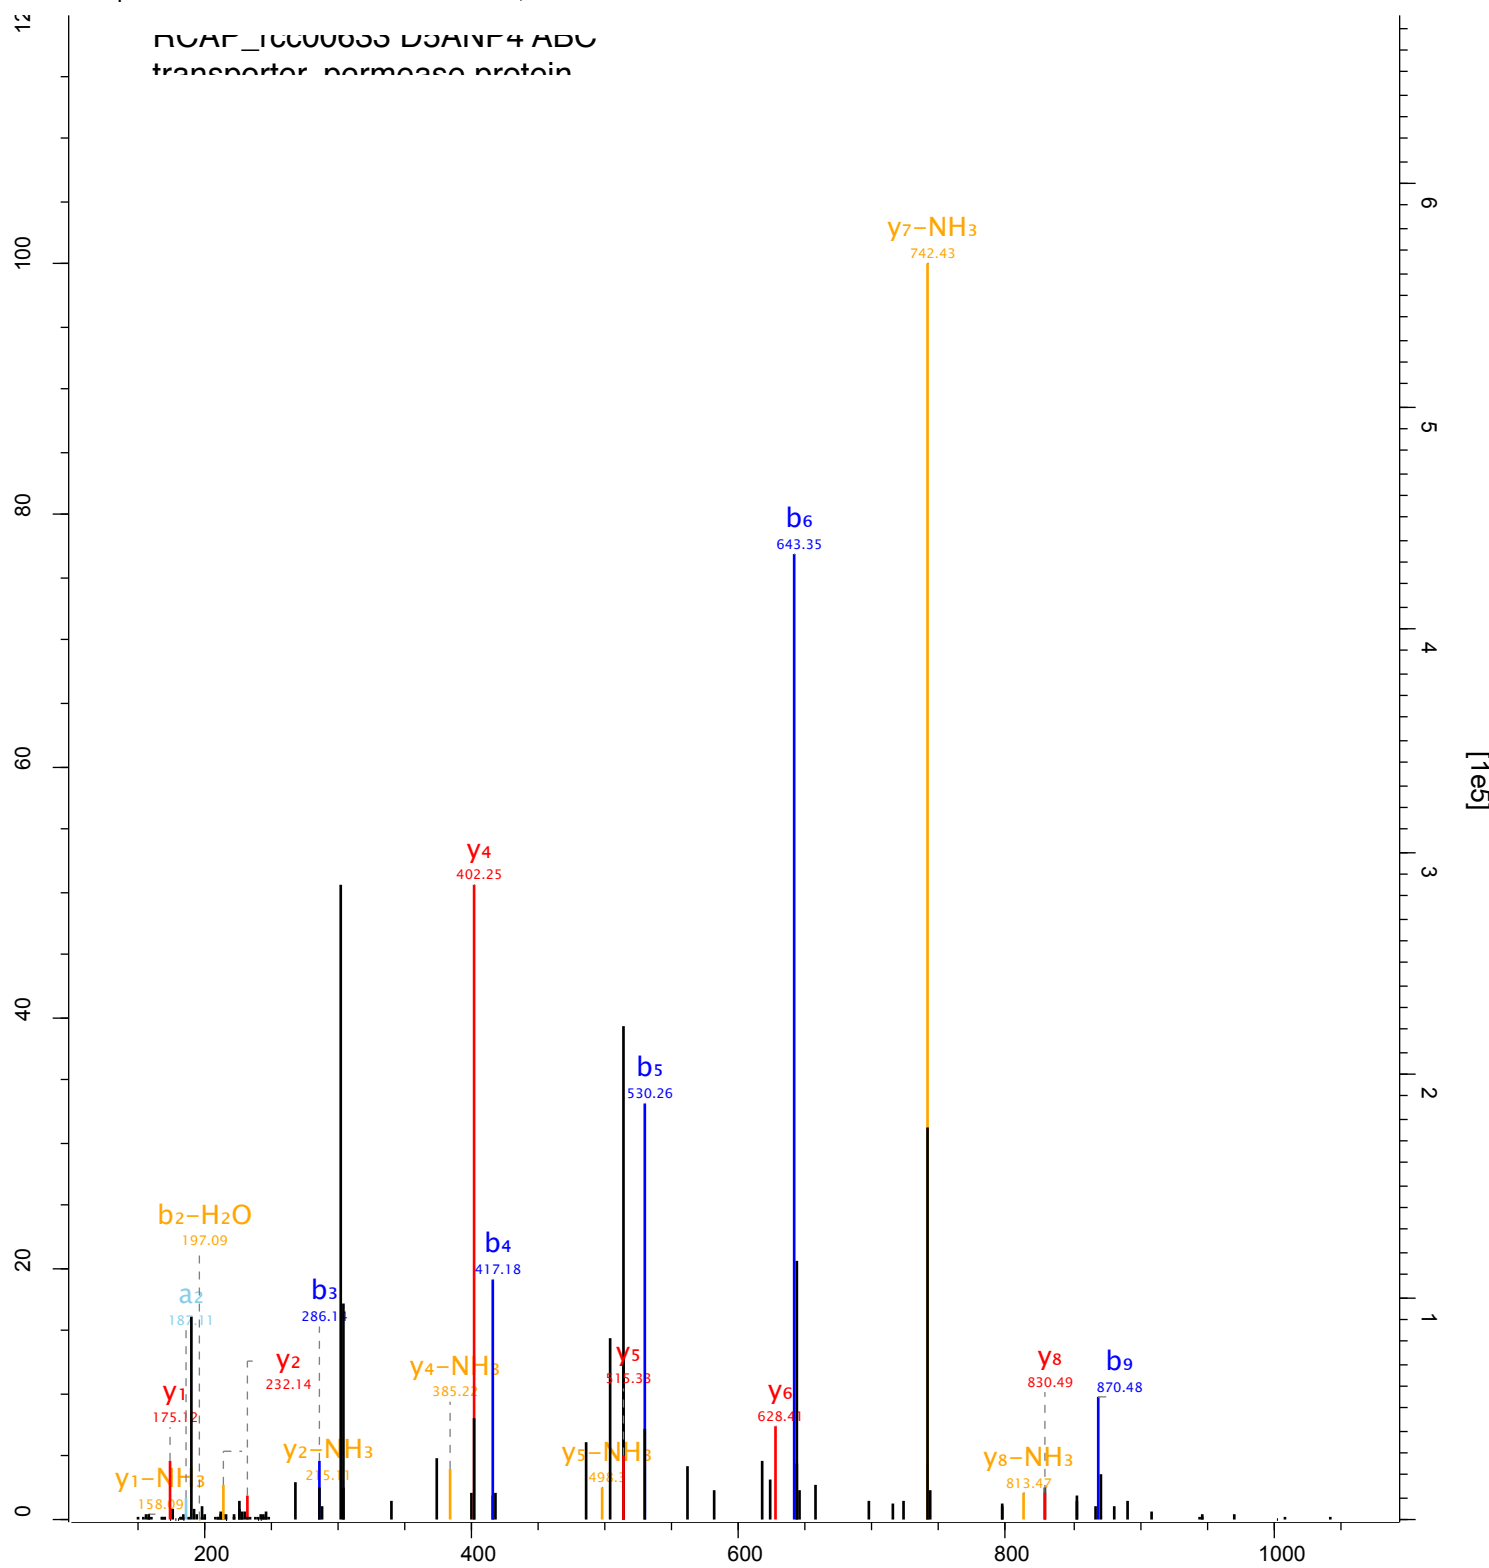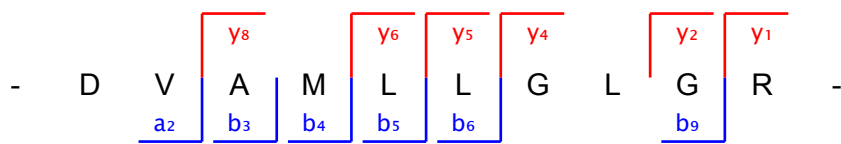

RCAP\_rcc00681 P17057 Protein CrtK

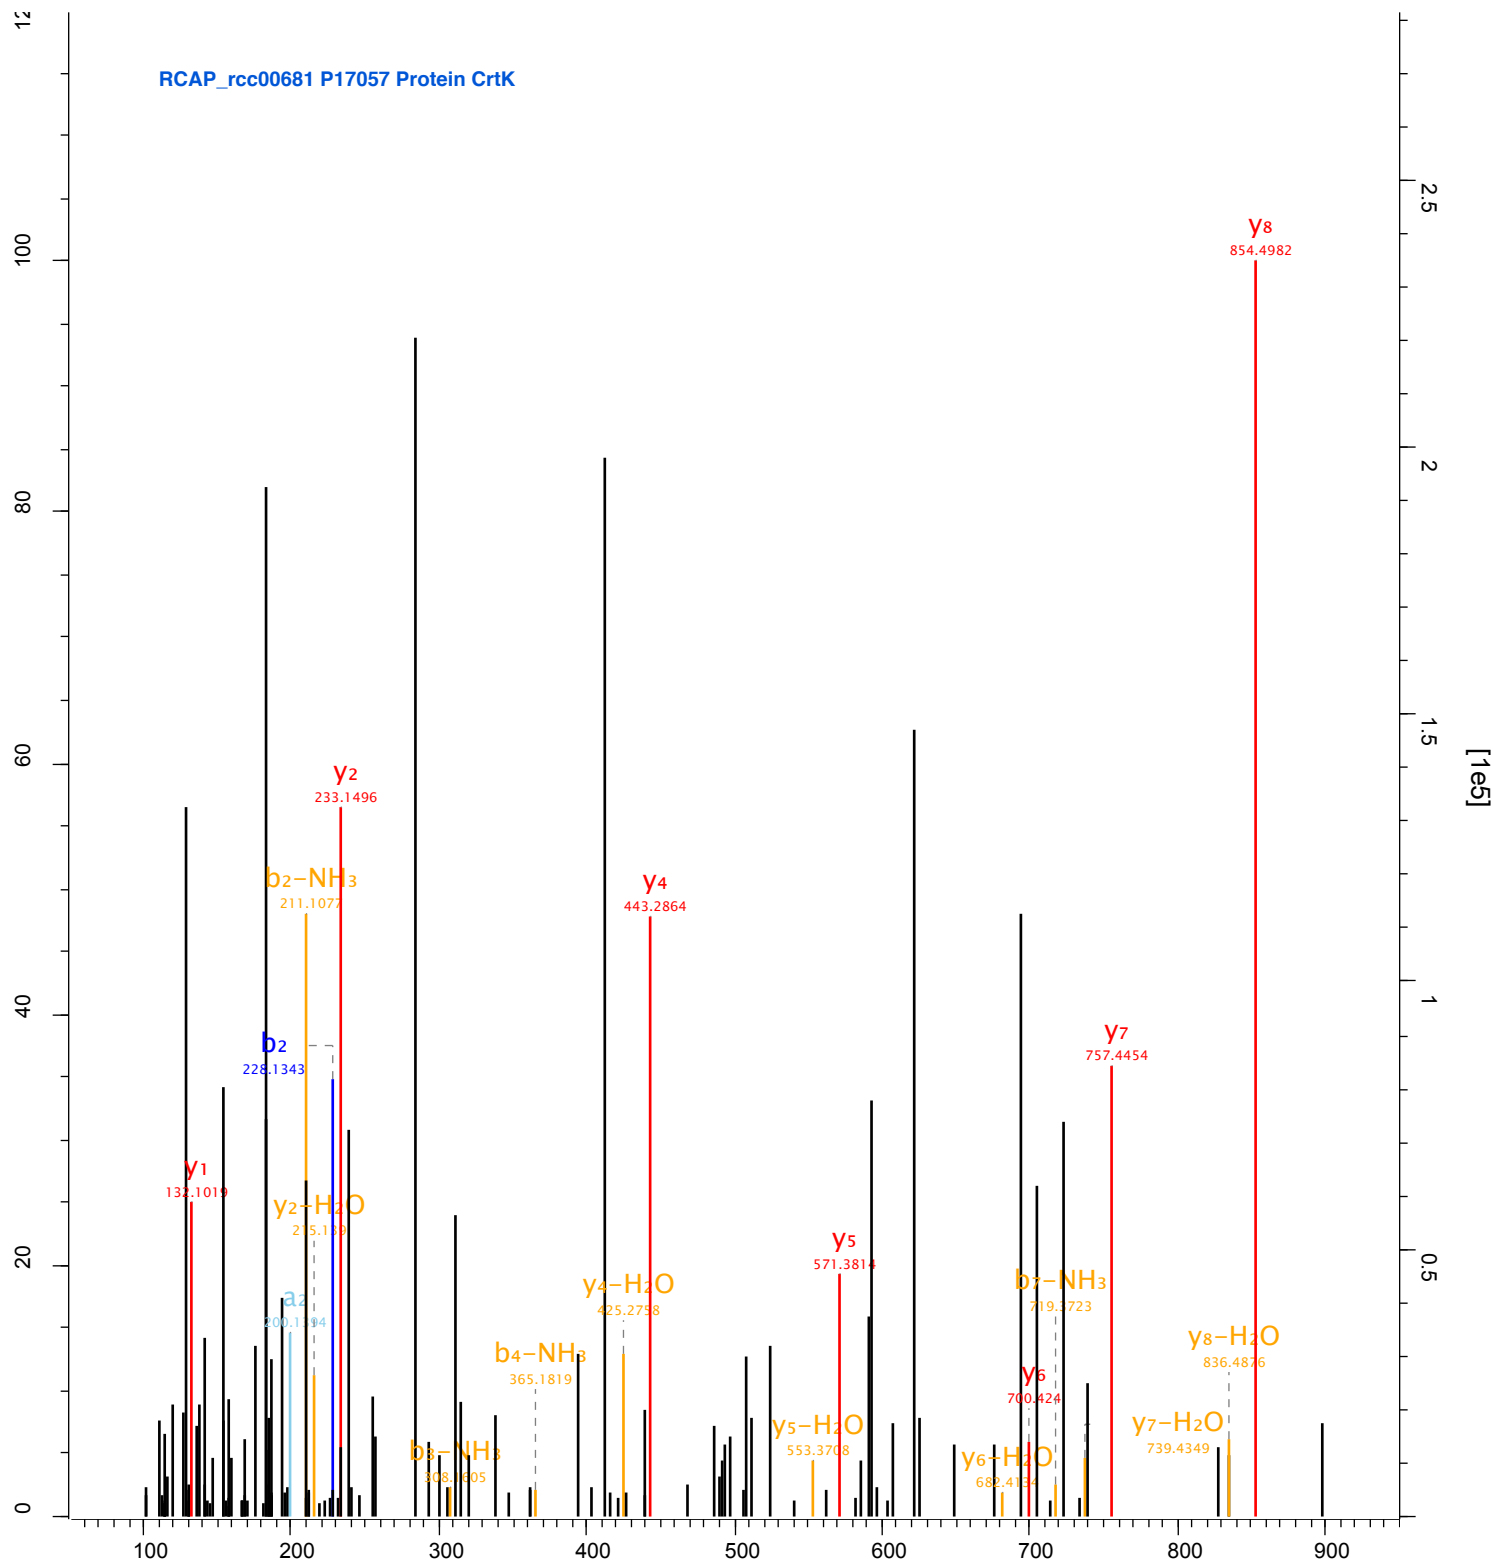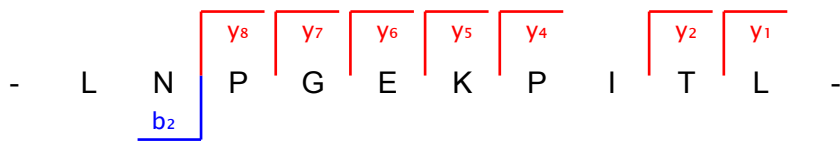

RCAP\_rcc00722 D5APB5 Lipoprotein, putative

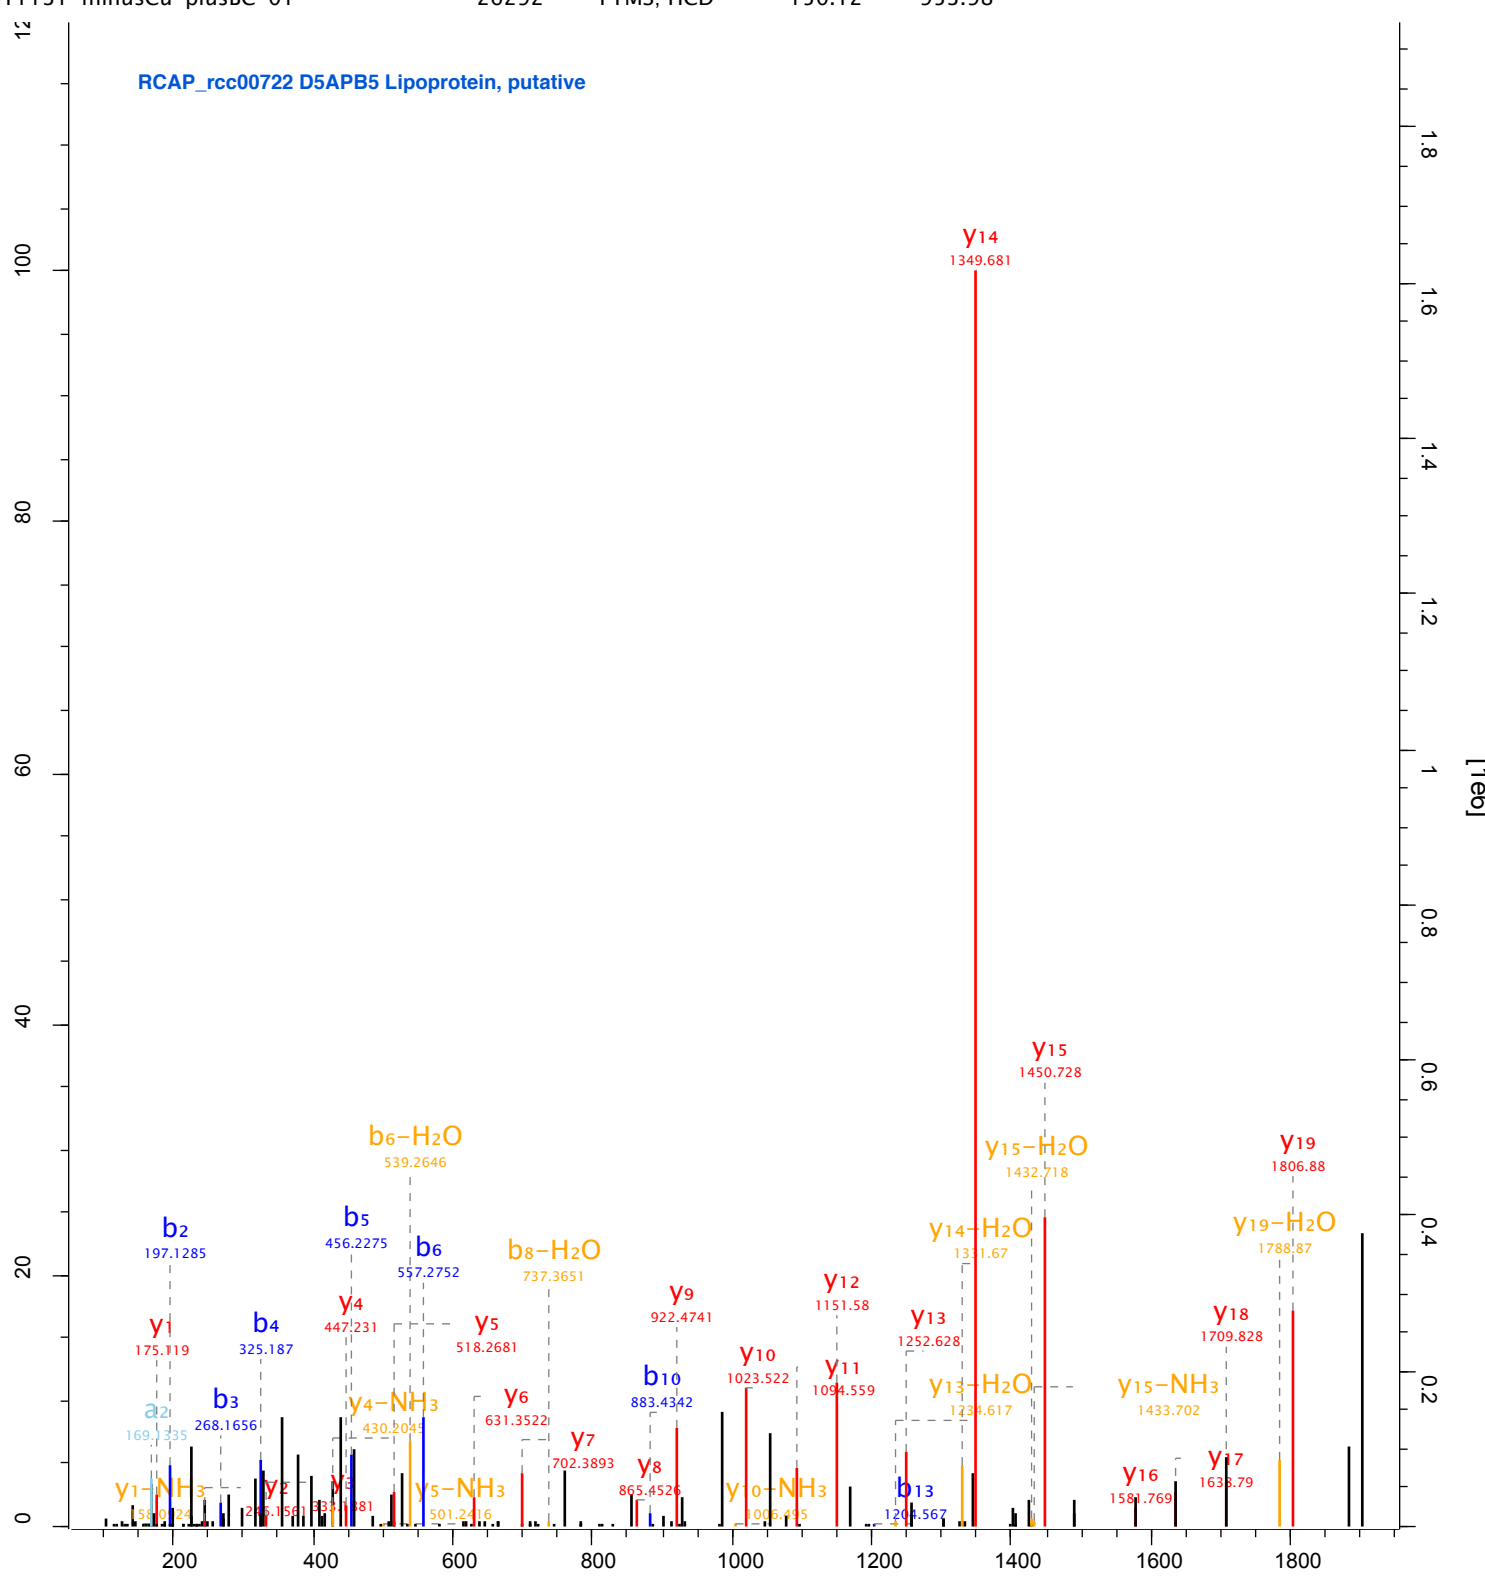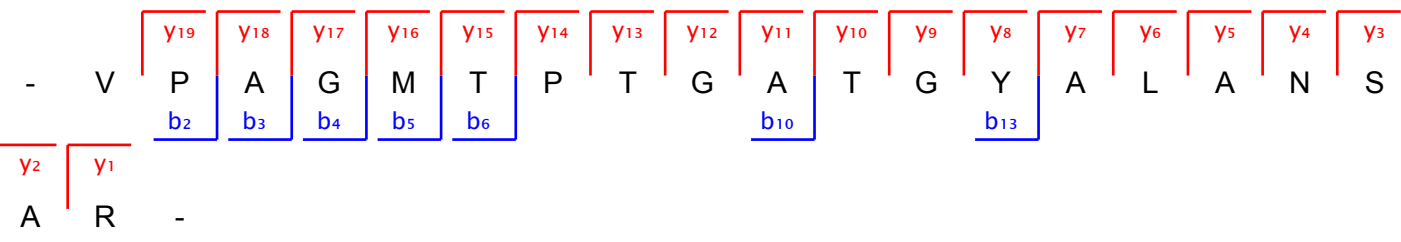

RCAP\_rcc00908 D5AQ86 Lipoprotein, putative

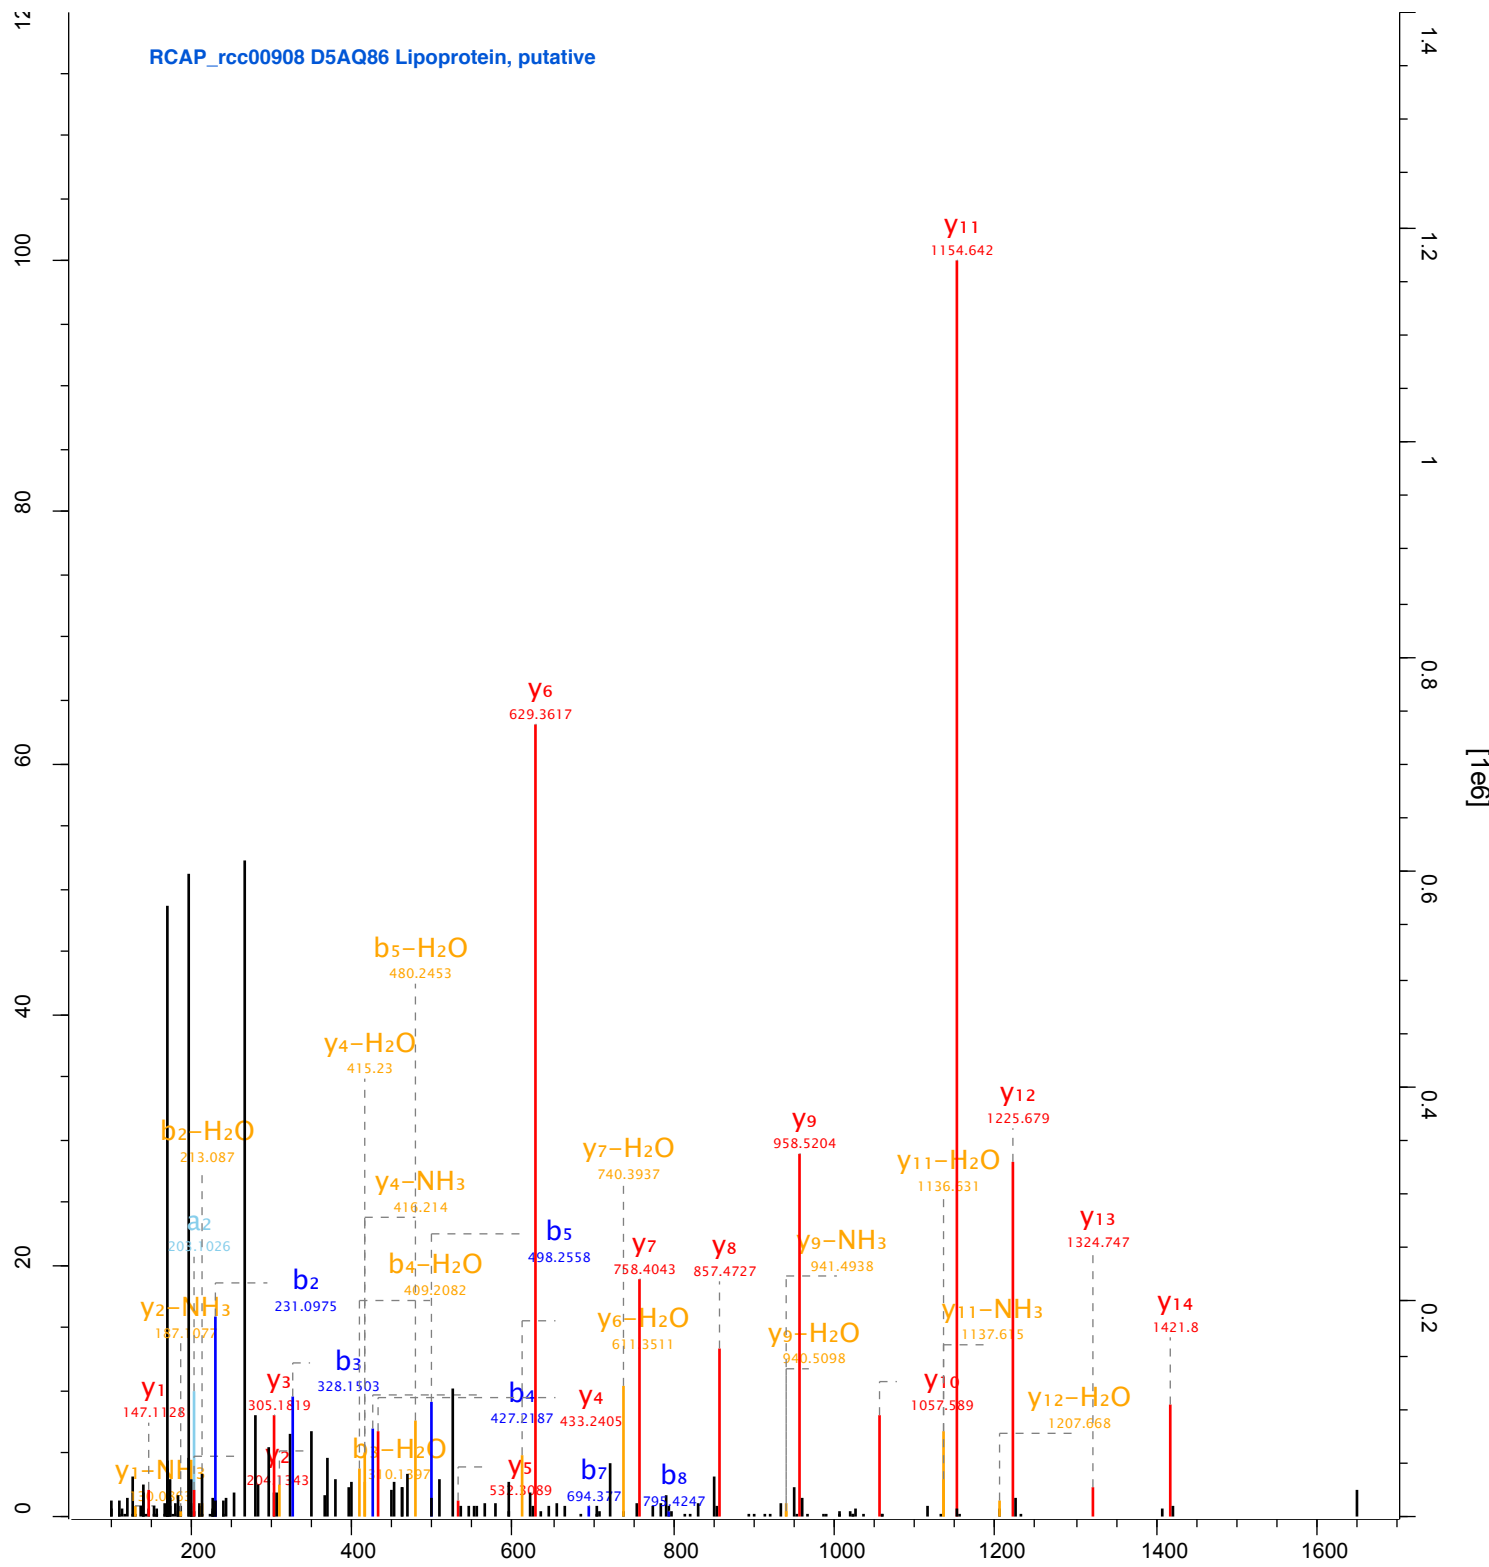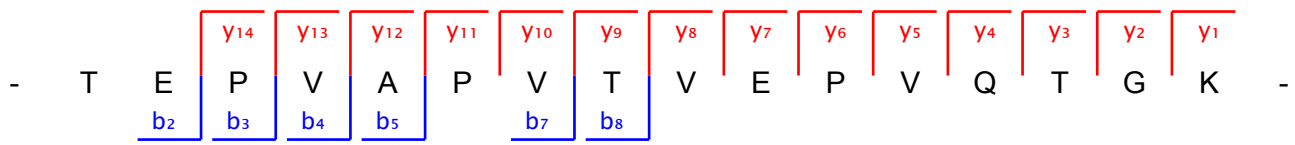

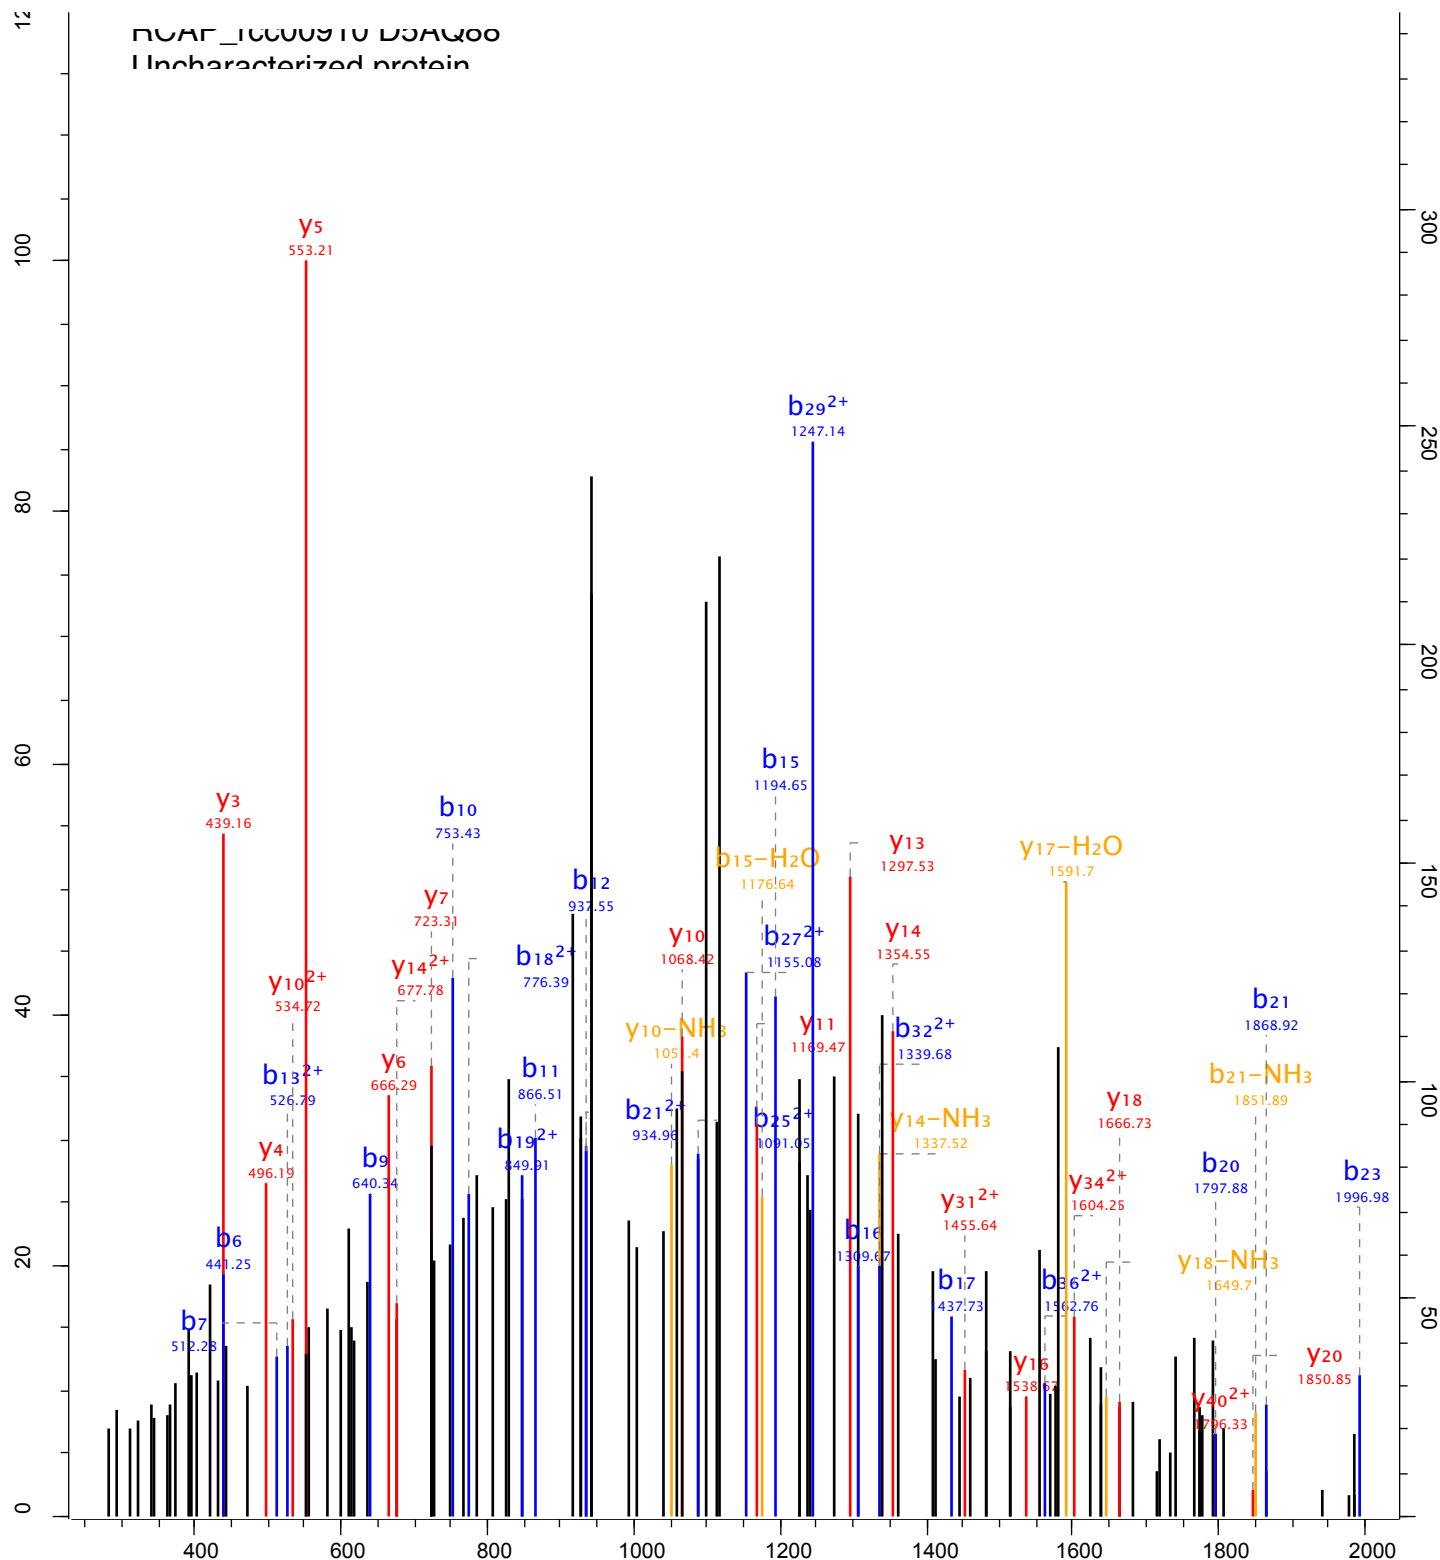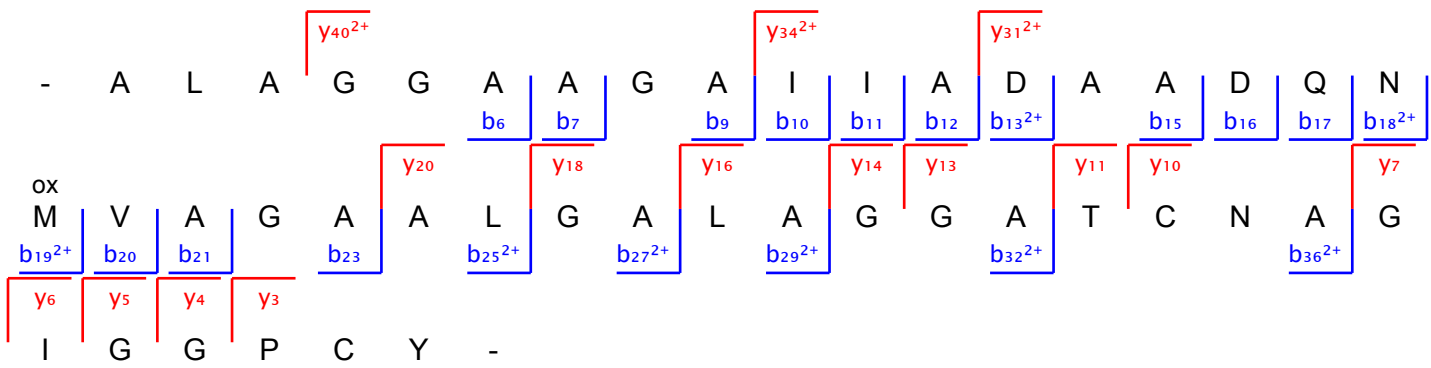



RCAP\_rcc01014 D5AQX1 Conserved domain protein

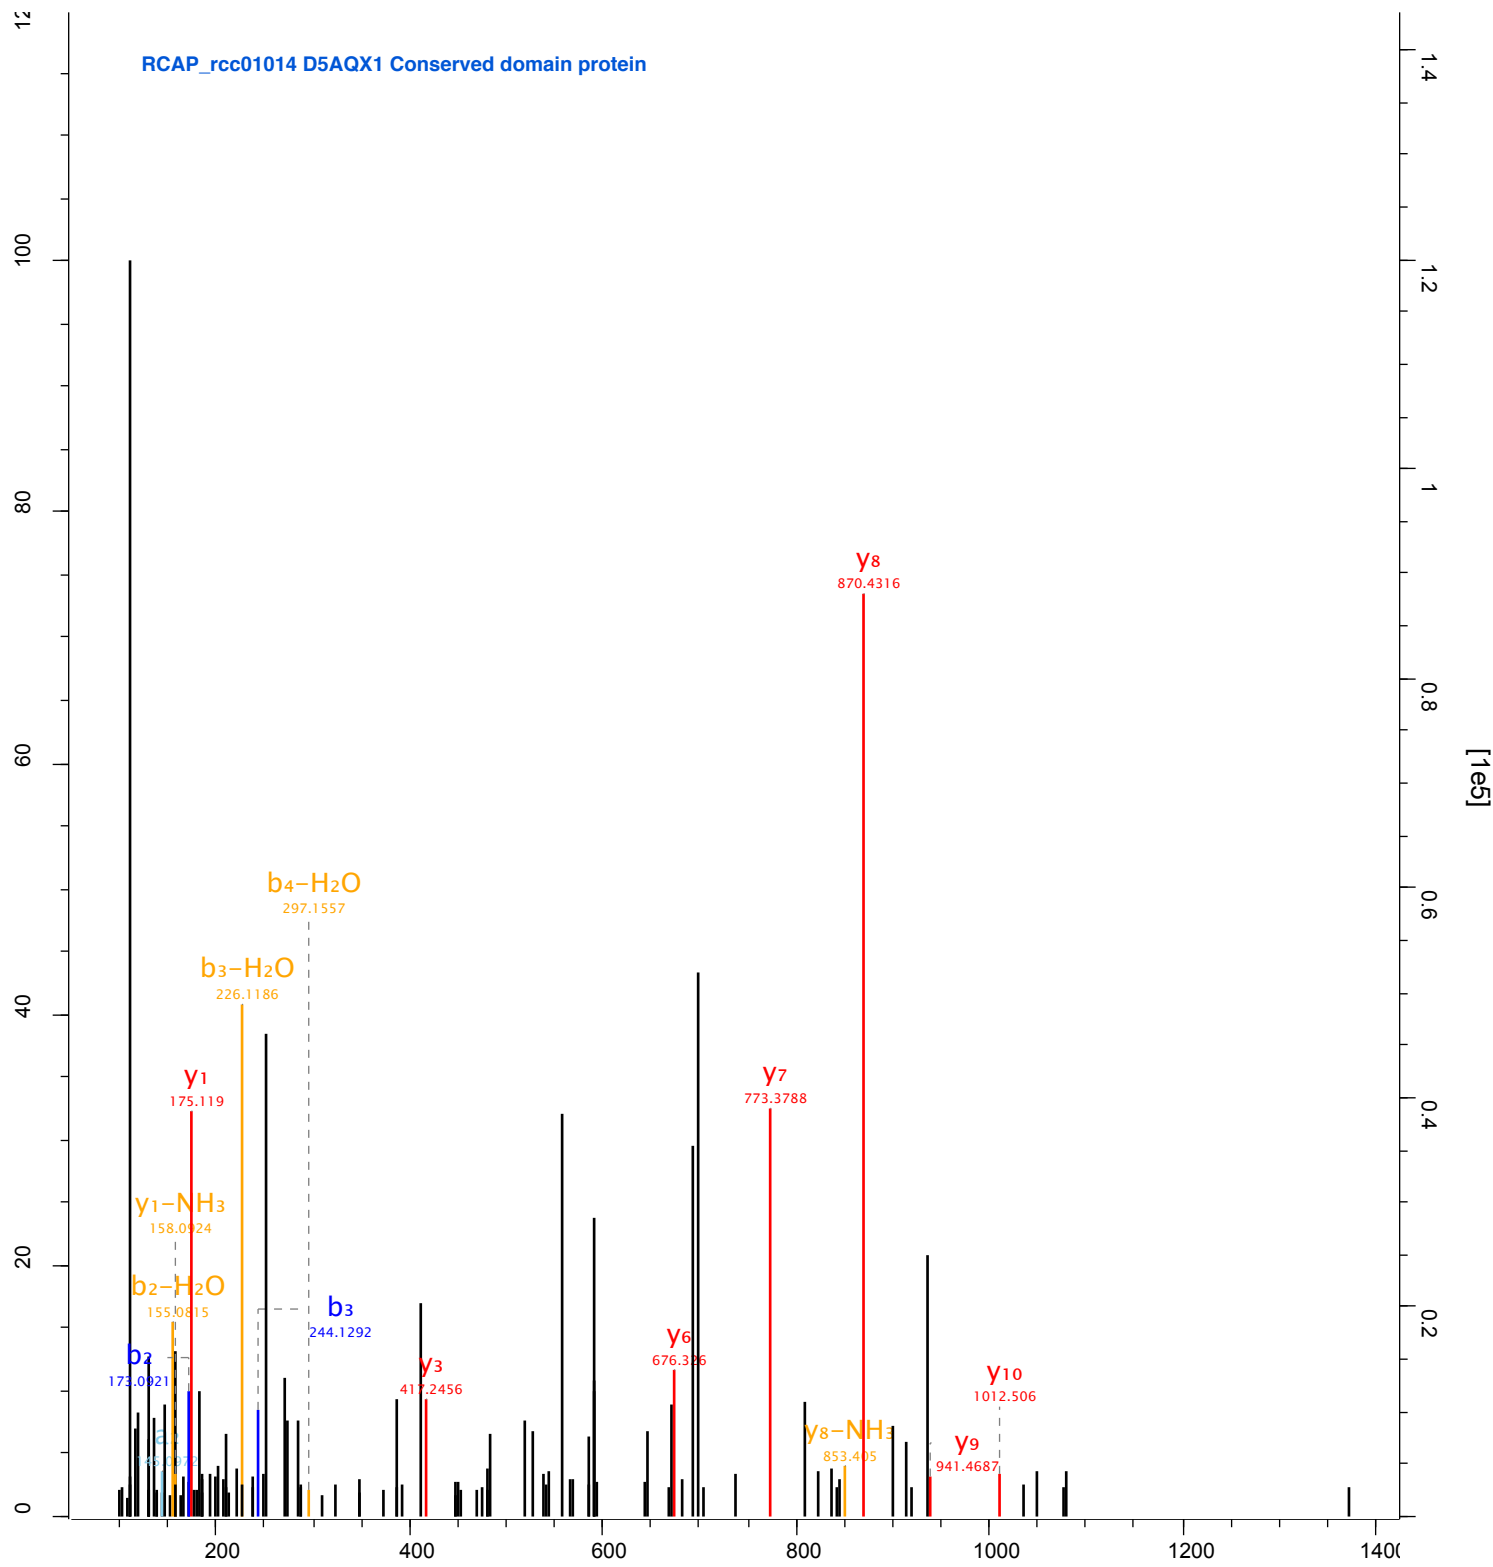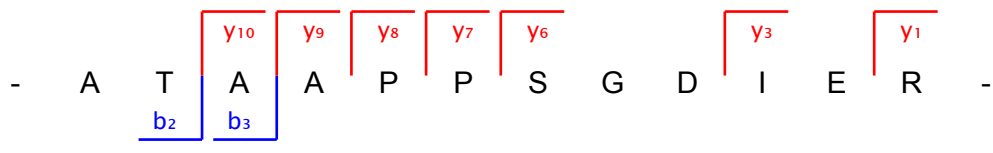

RCAP\_rcc01045 D5AQZ9 Iron siderophore/cobalamin ABC transporter, ATP-binding protein

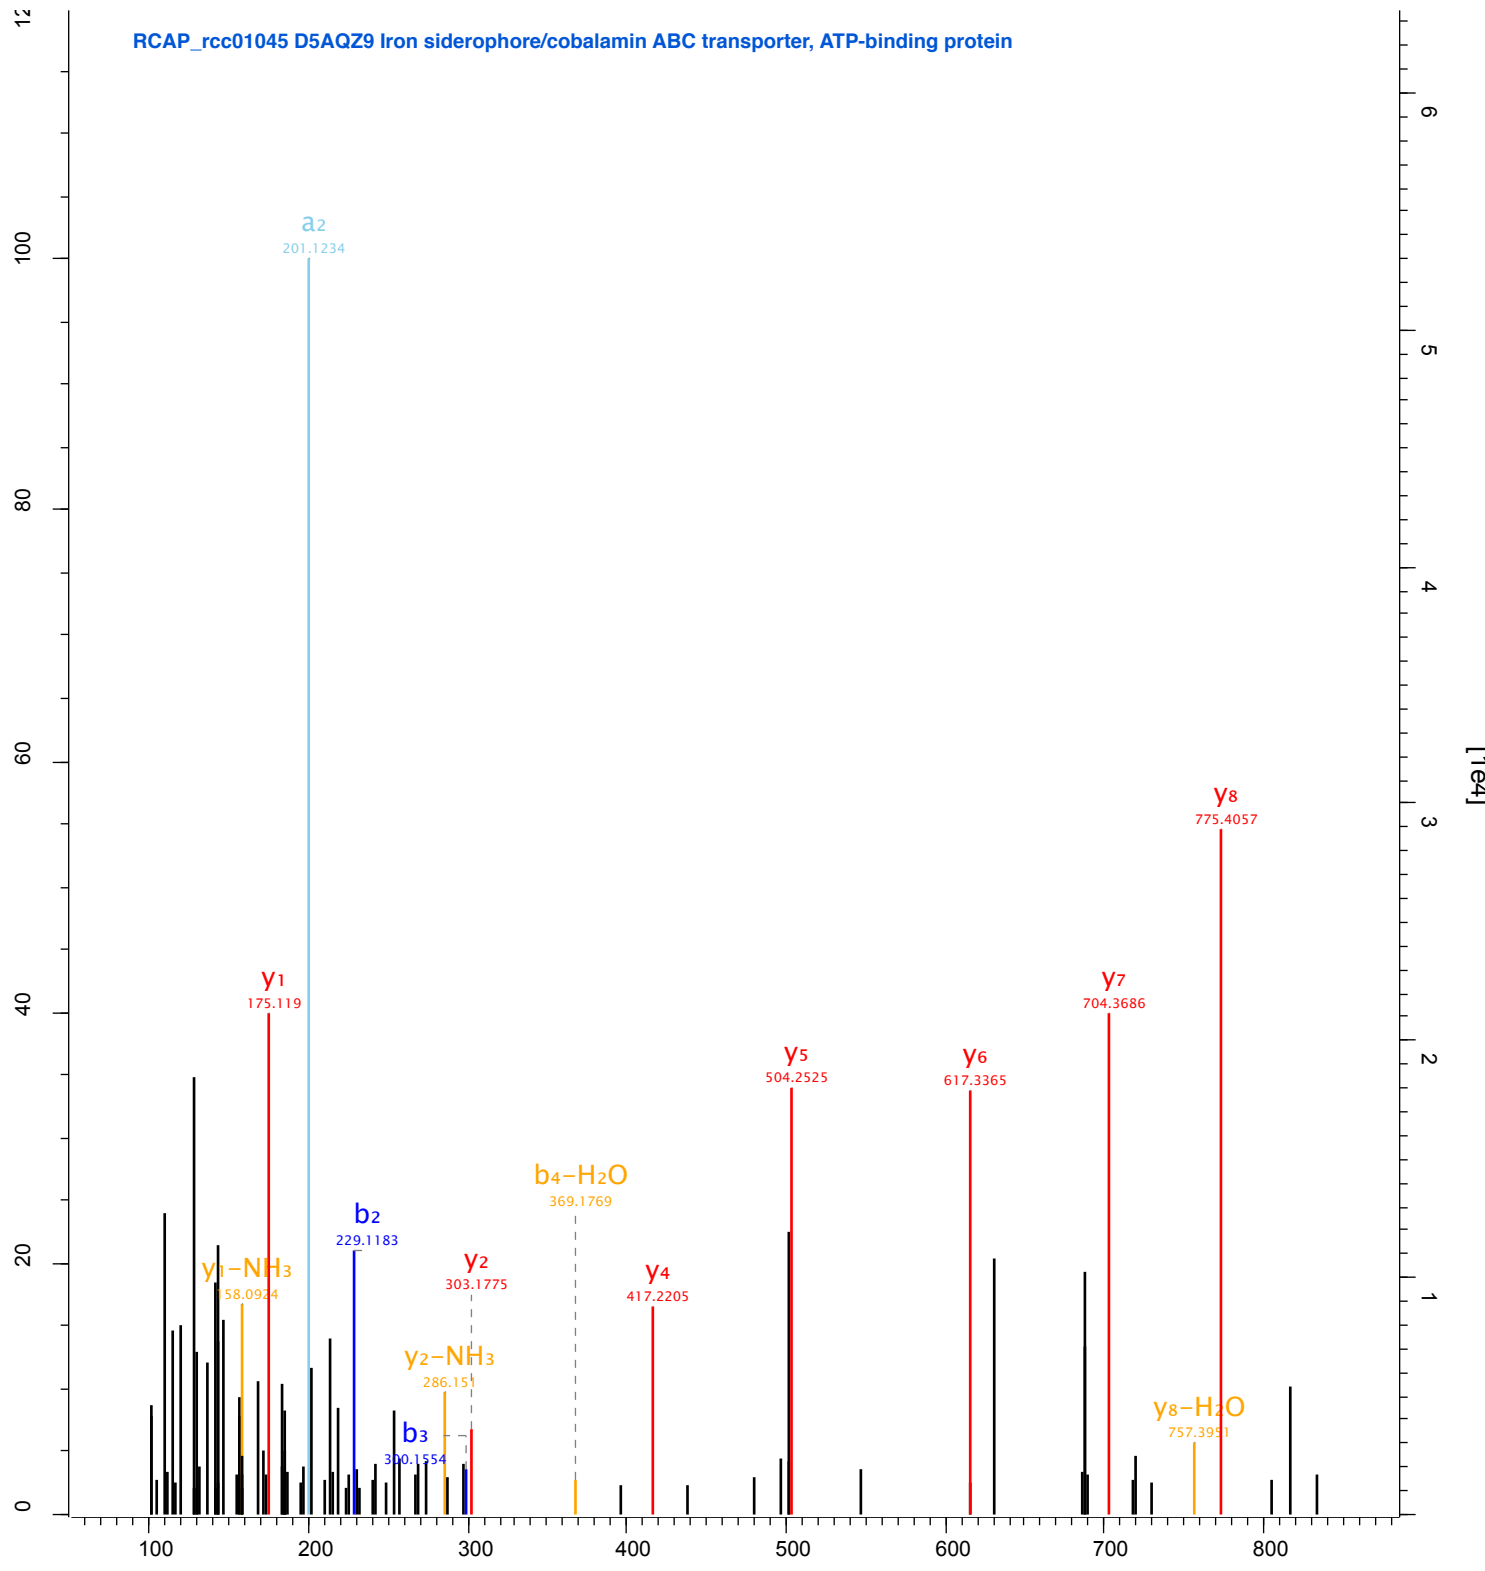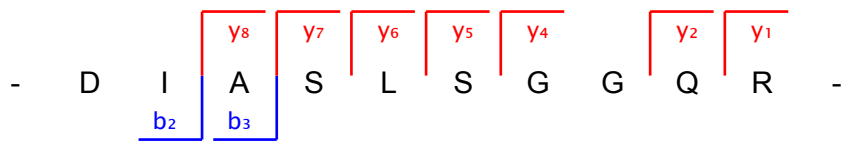

RCAP\_rcc01054 D5AR08 Gas vesicle structural protein

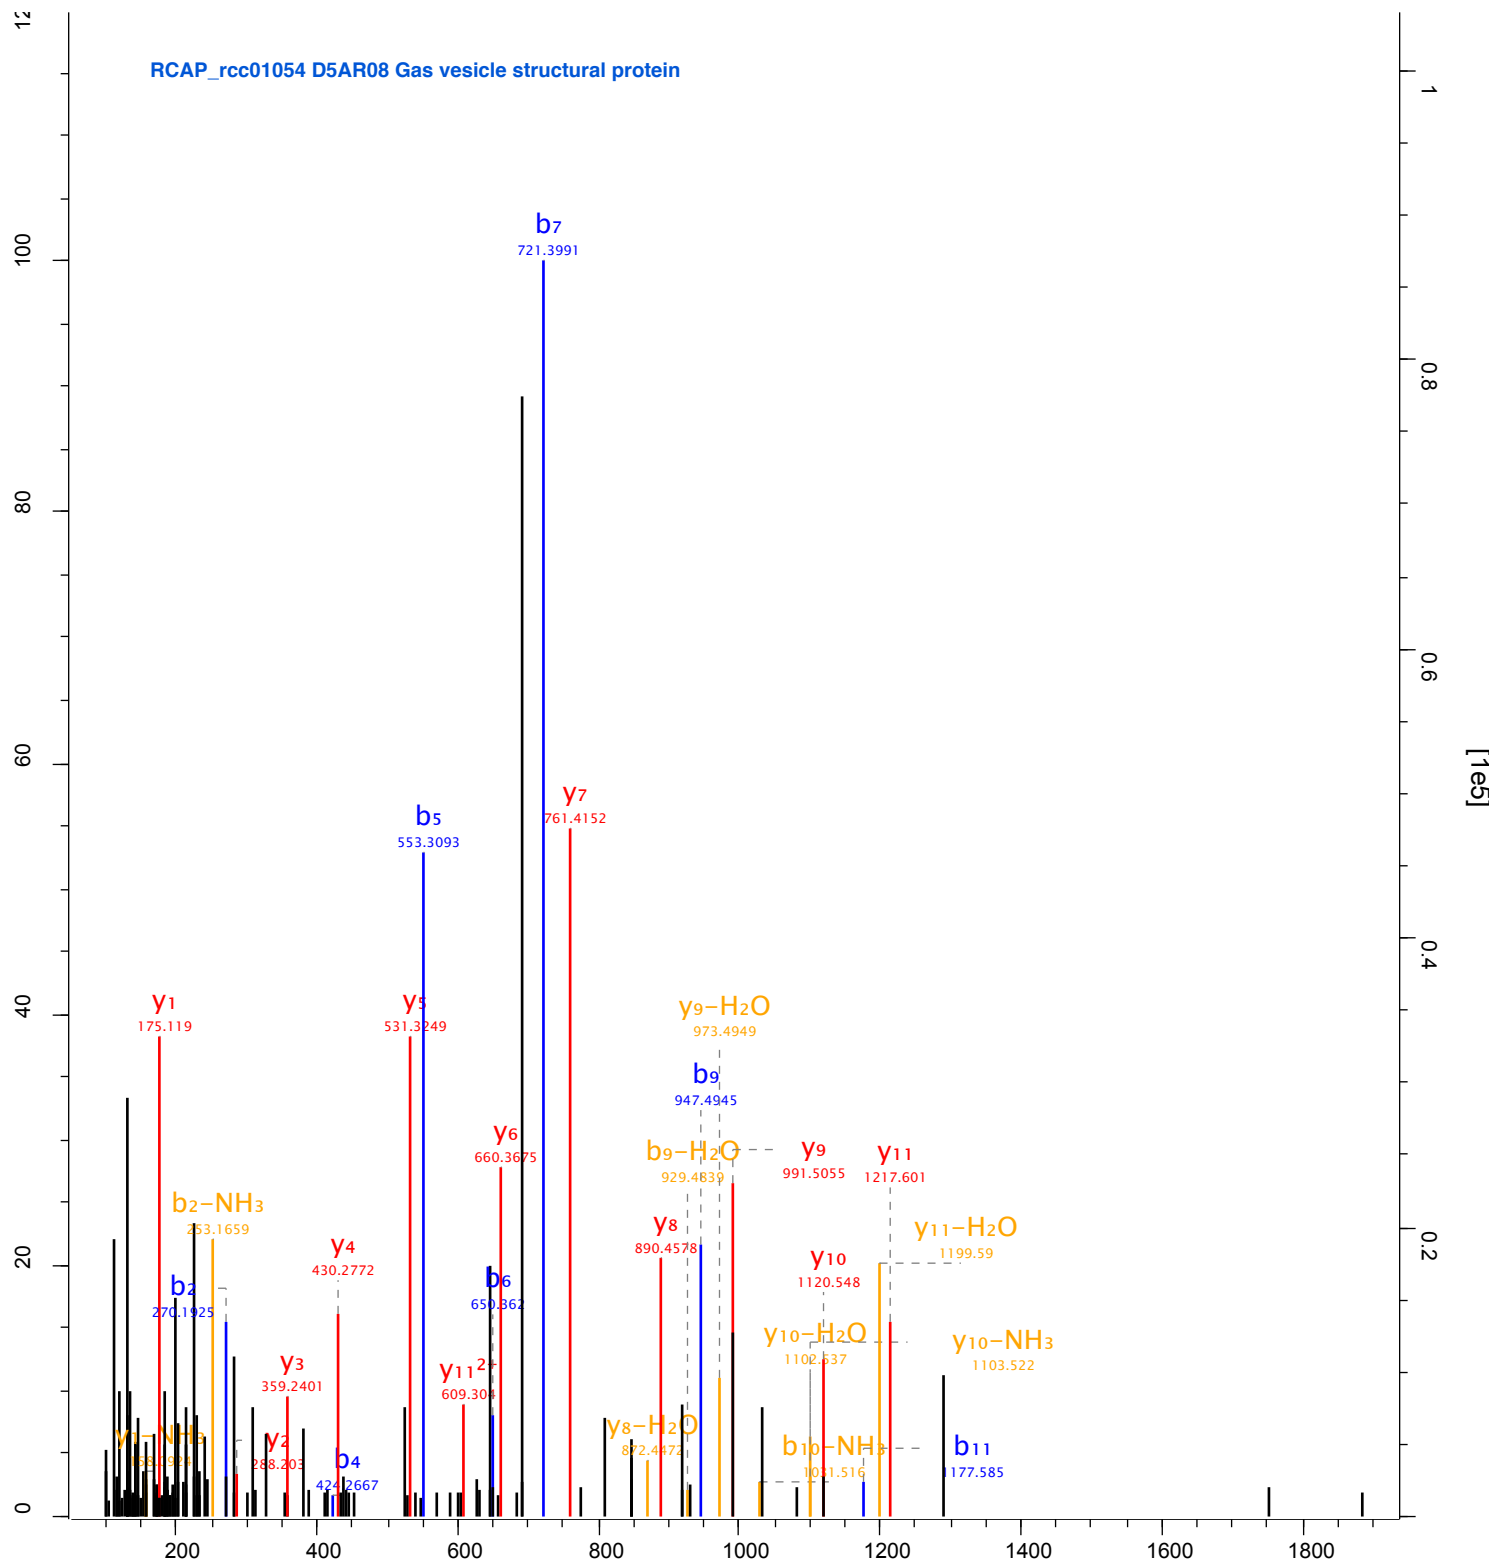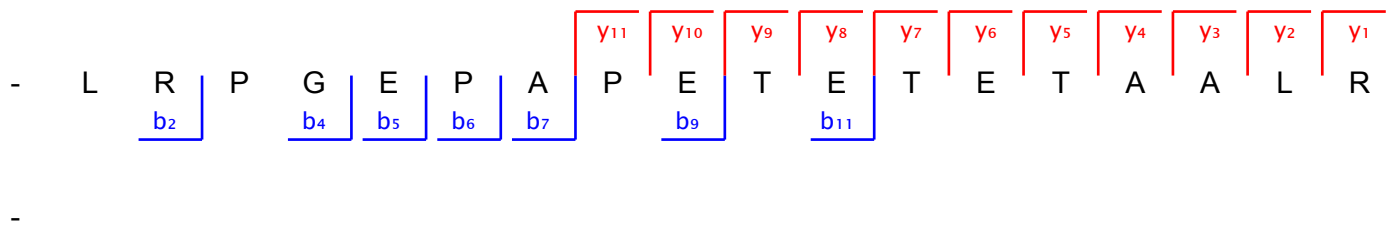

RCAP\_rcc01112 D5ARJ9 Uncharacterized protein

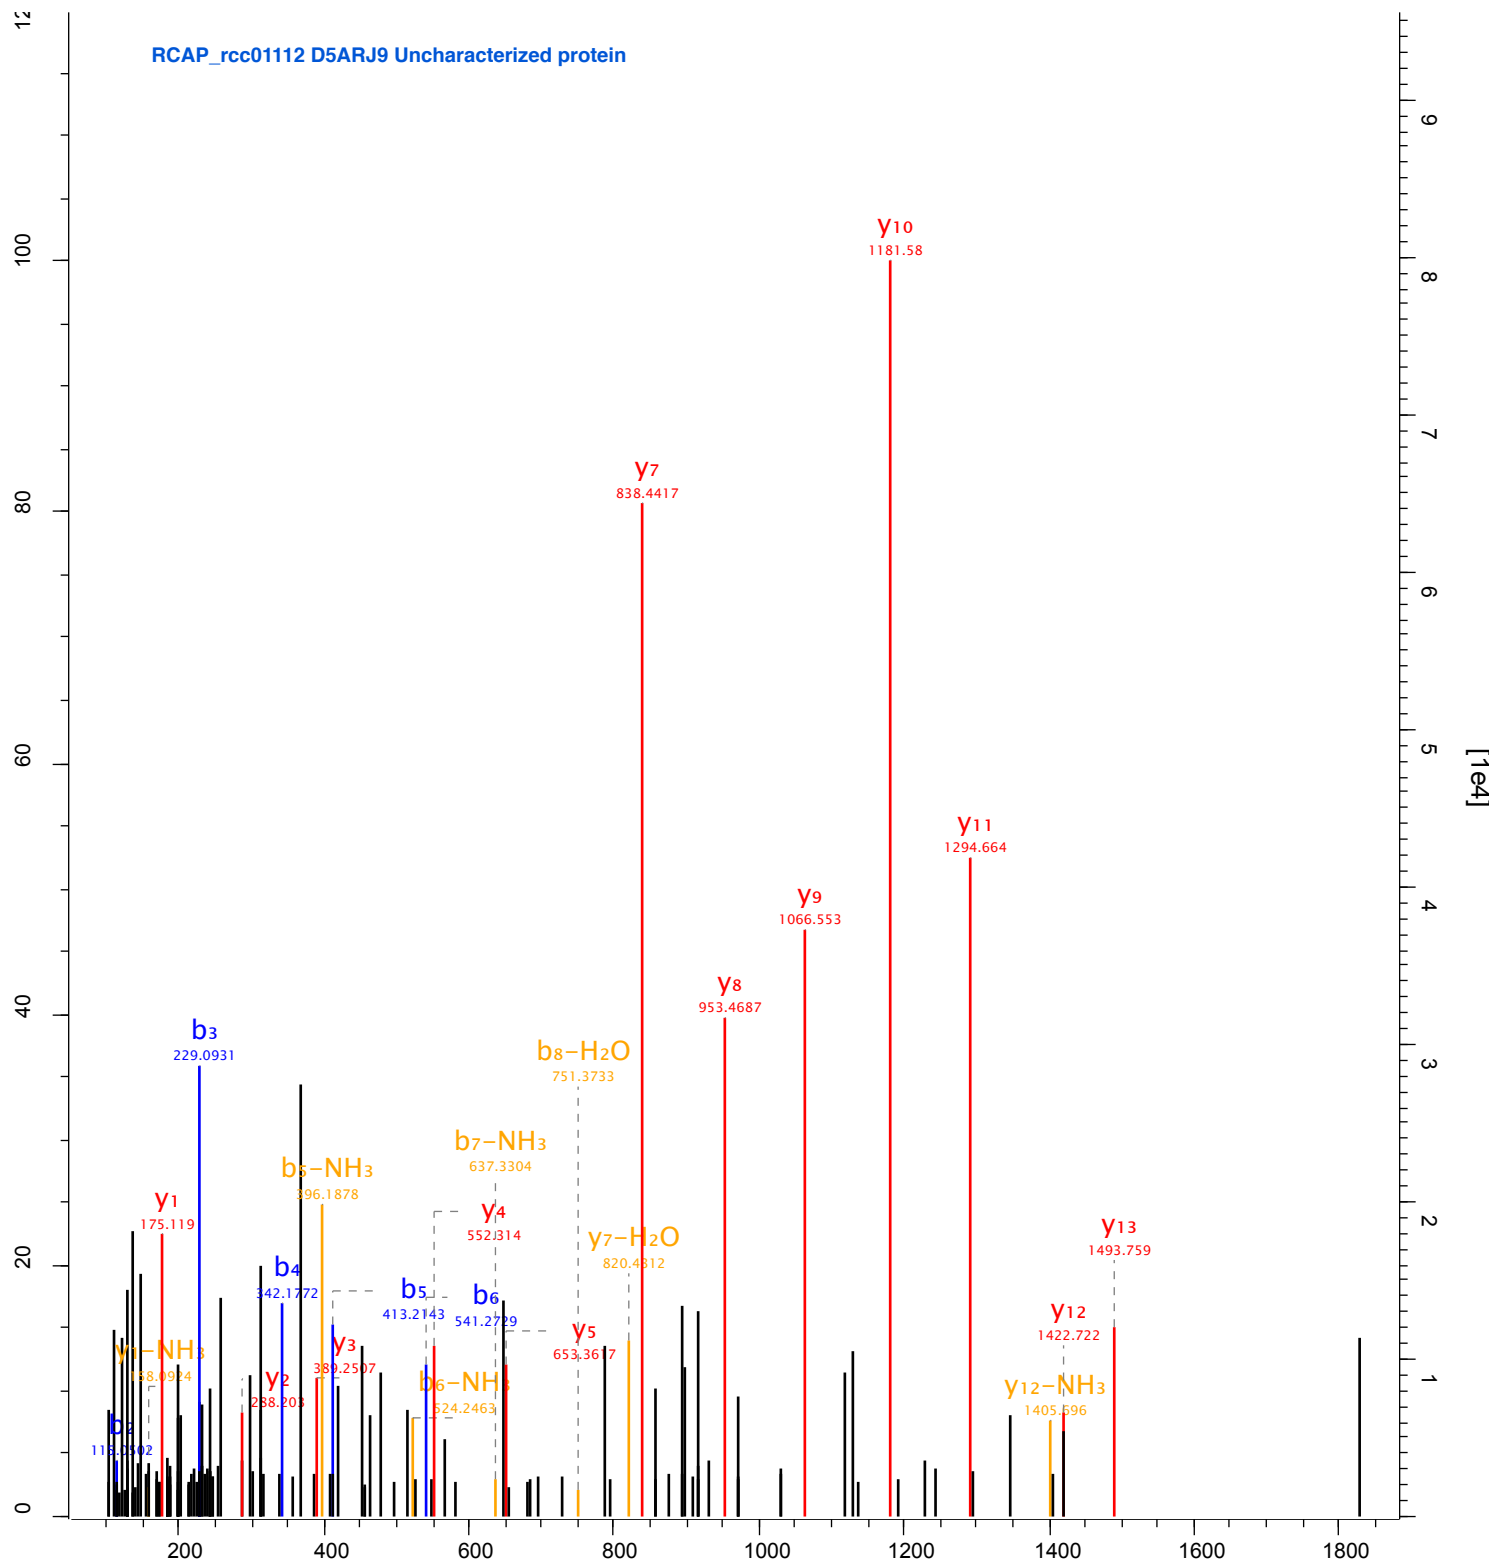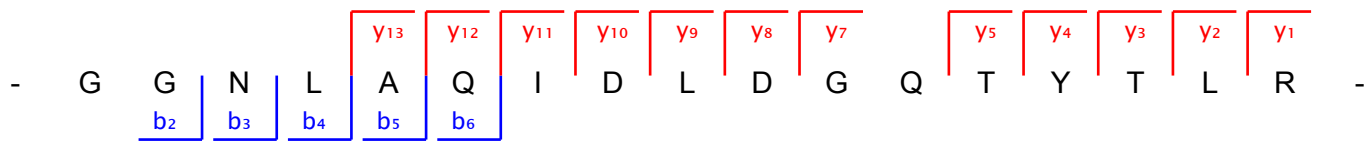

RCAP\_rcc01219 D5AS85 Urease subunit beta

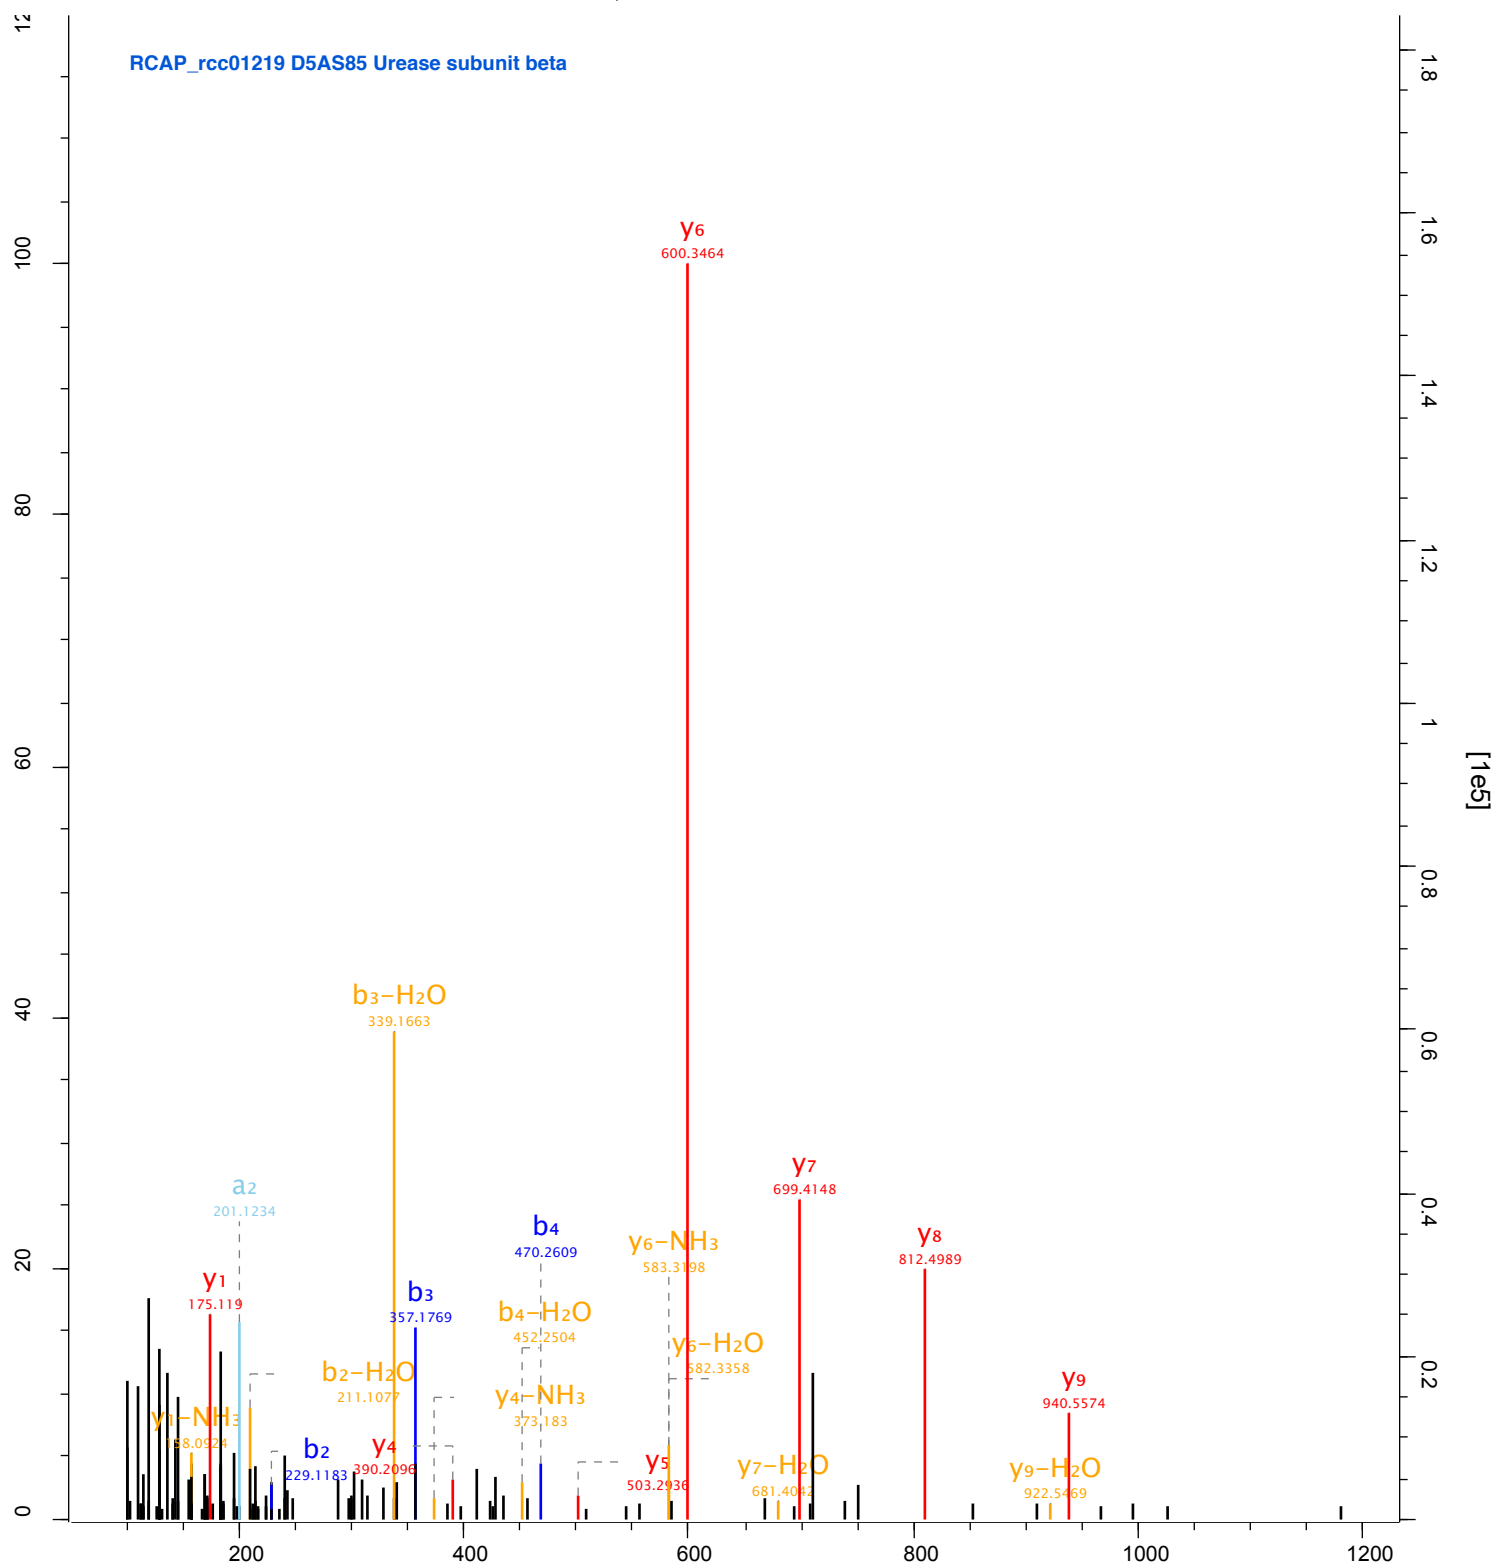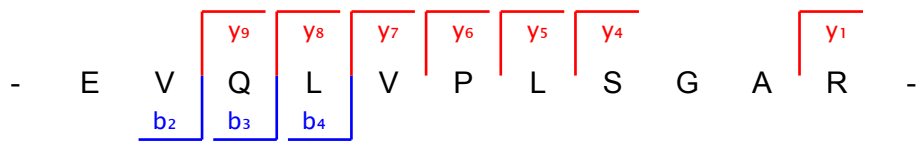

RCAP\_rcc01262 D5ASC8 Recombinase

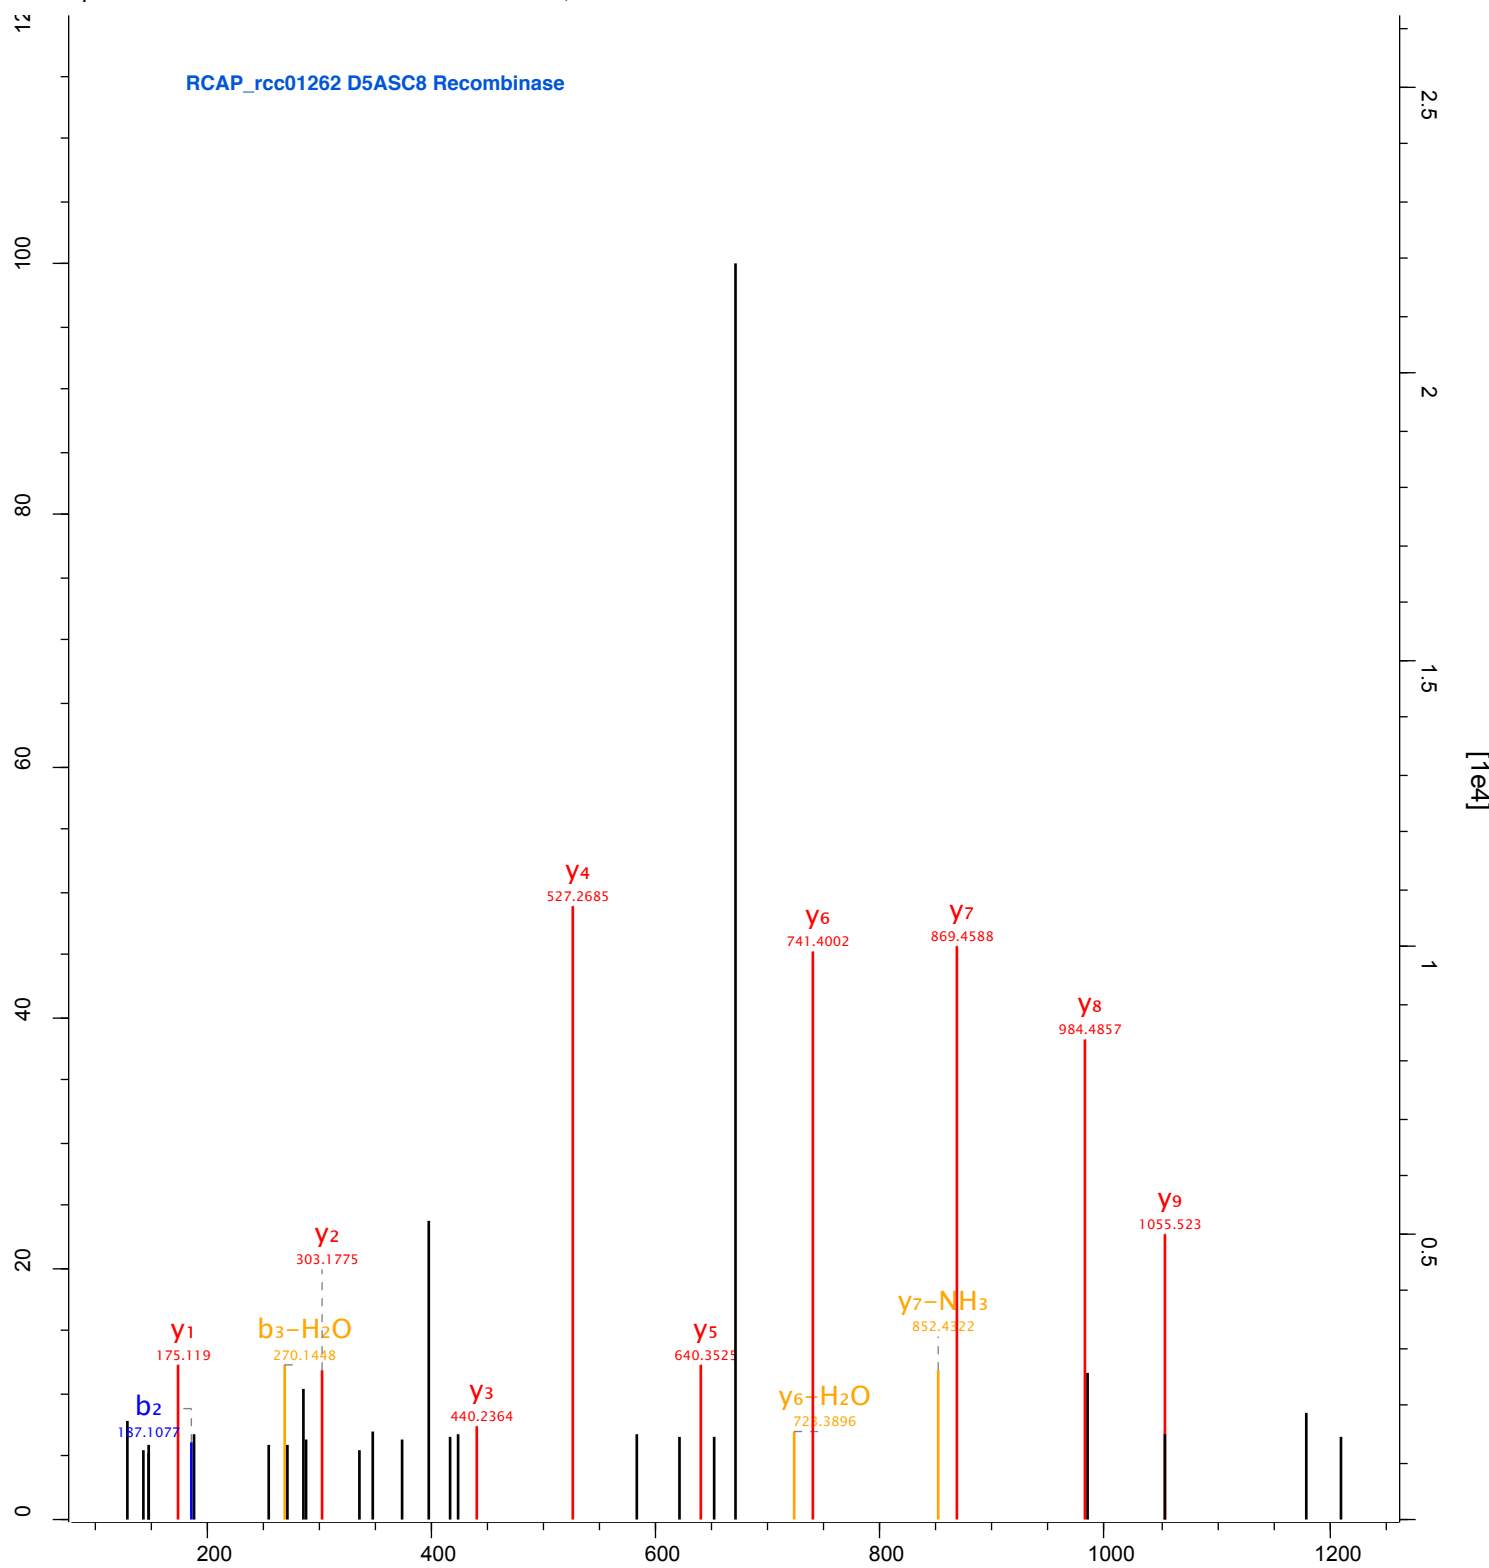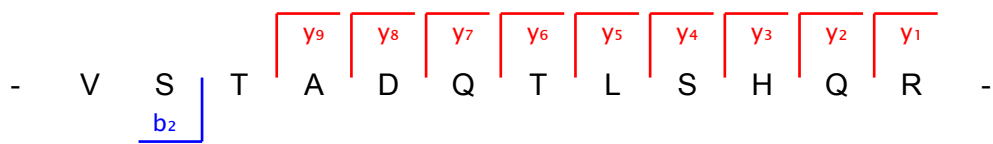

RCAP\_rcc01320 D5ASI0 Uncharacterized protein

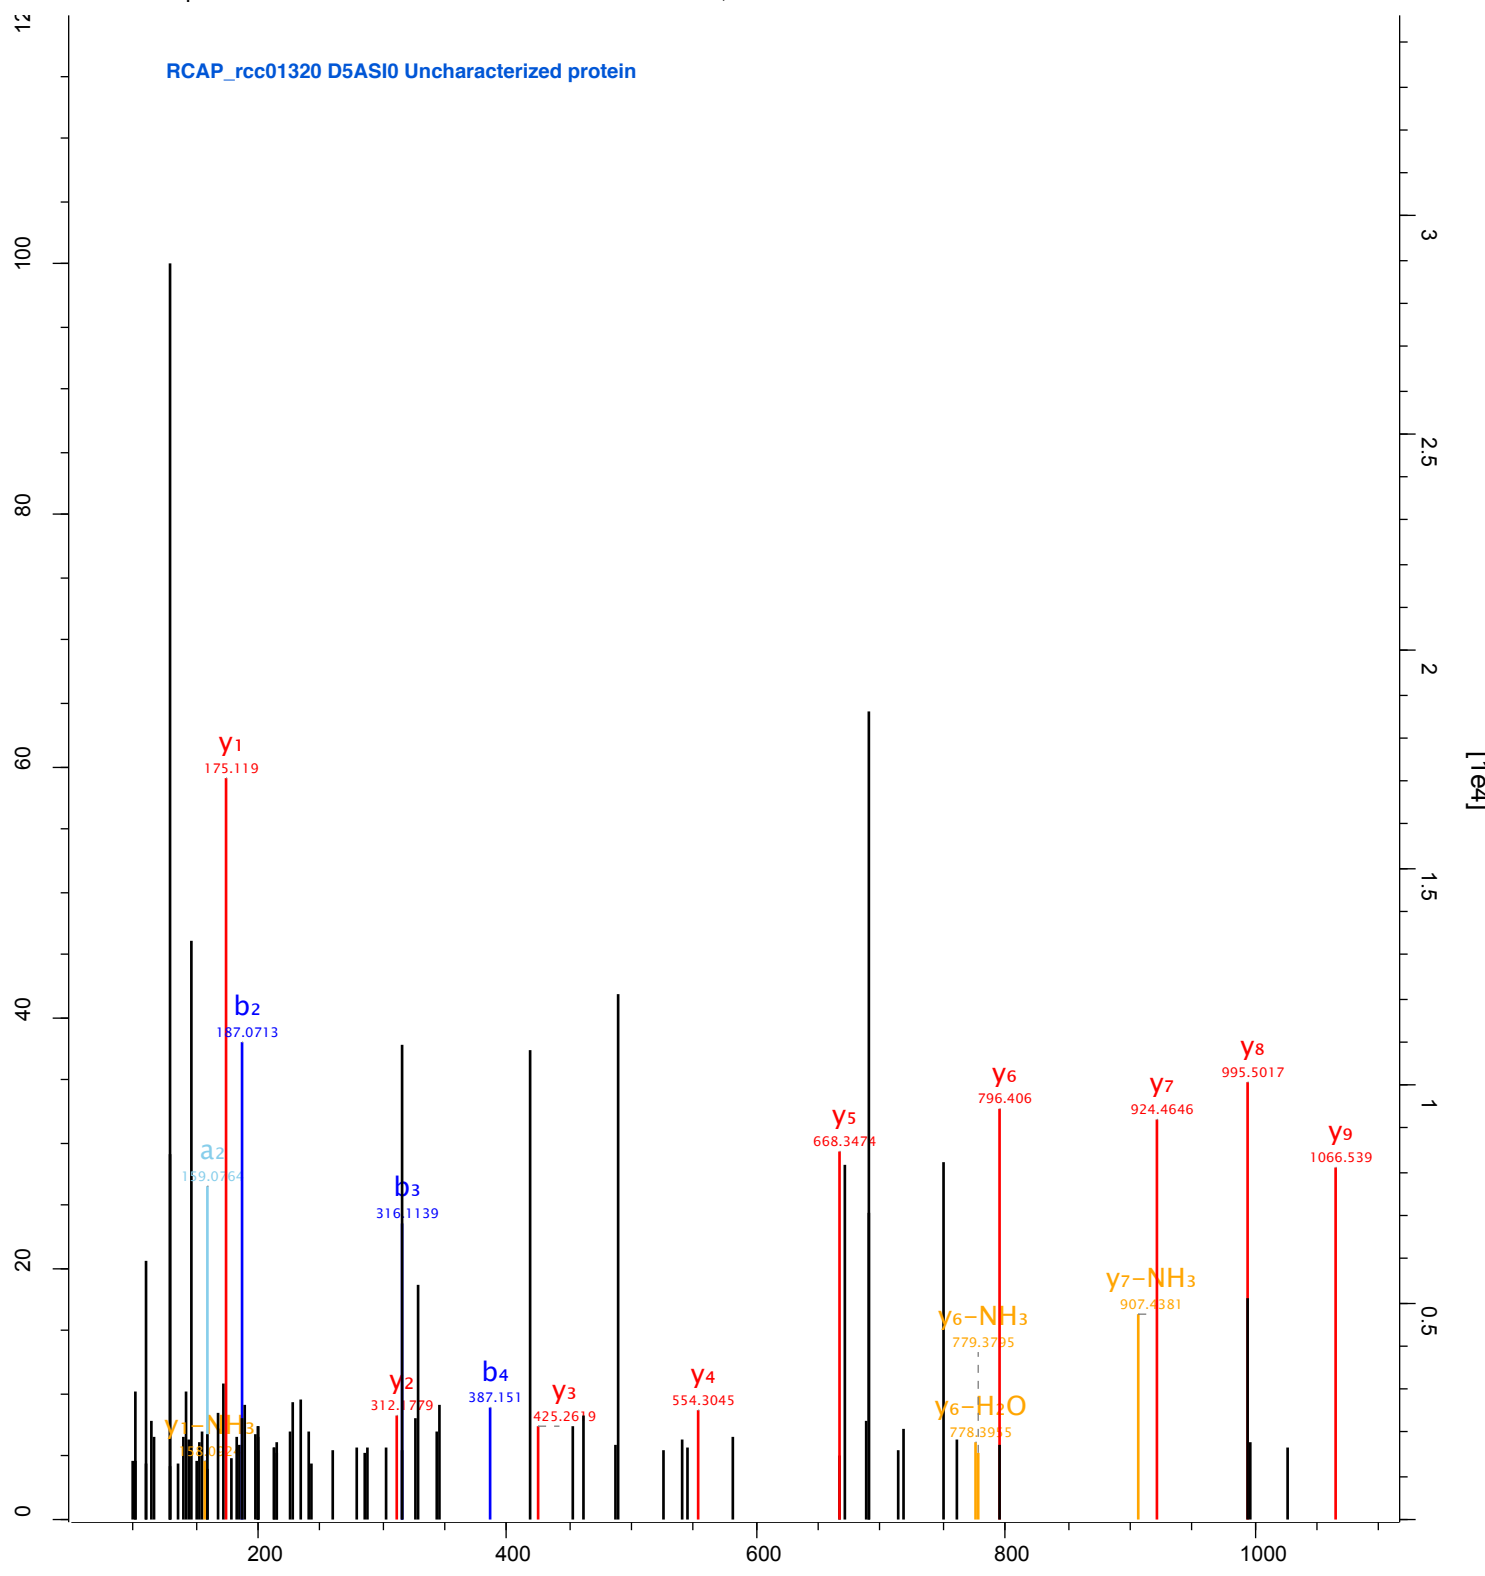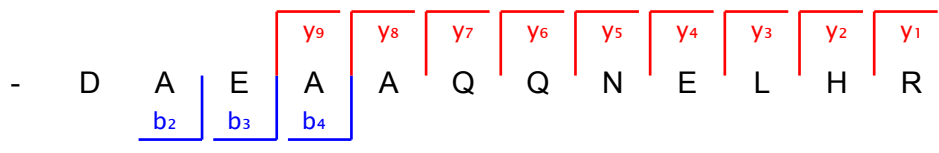

RCAP\_rcc01348 D5ASK3 Exonuclease family protein

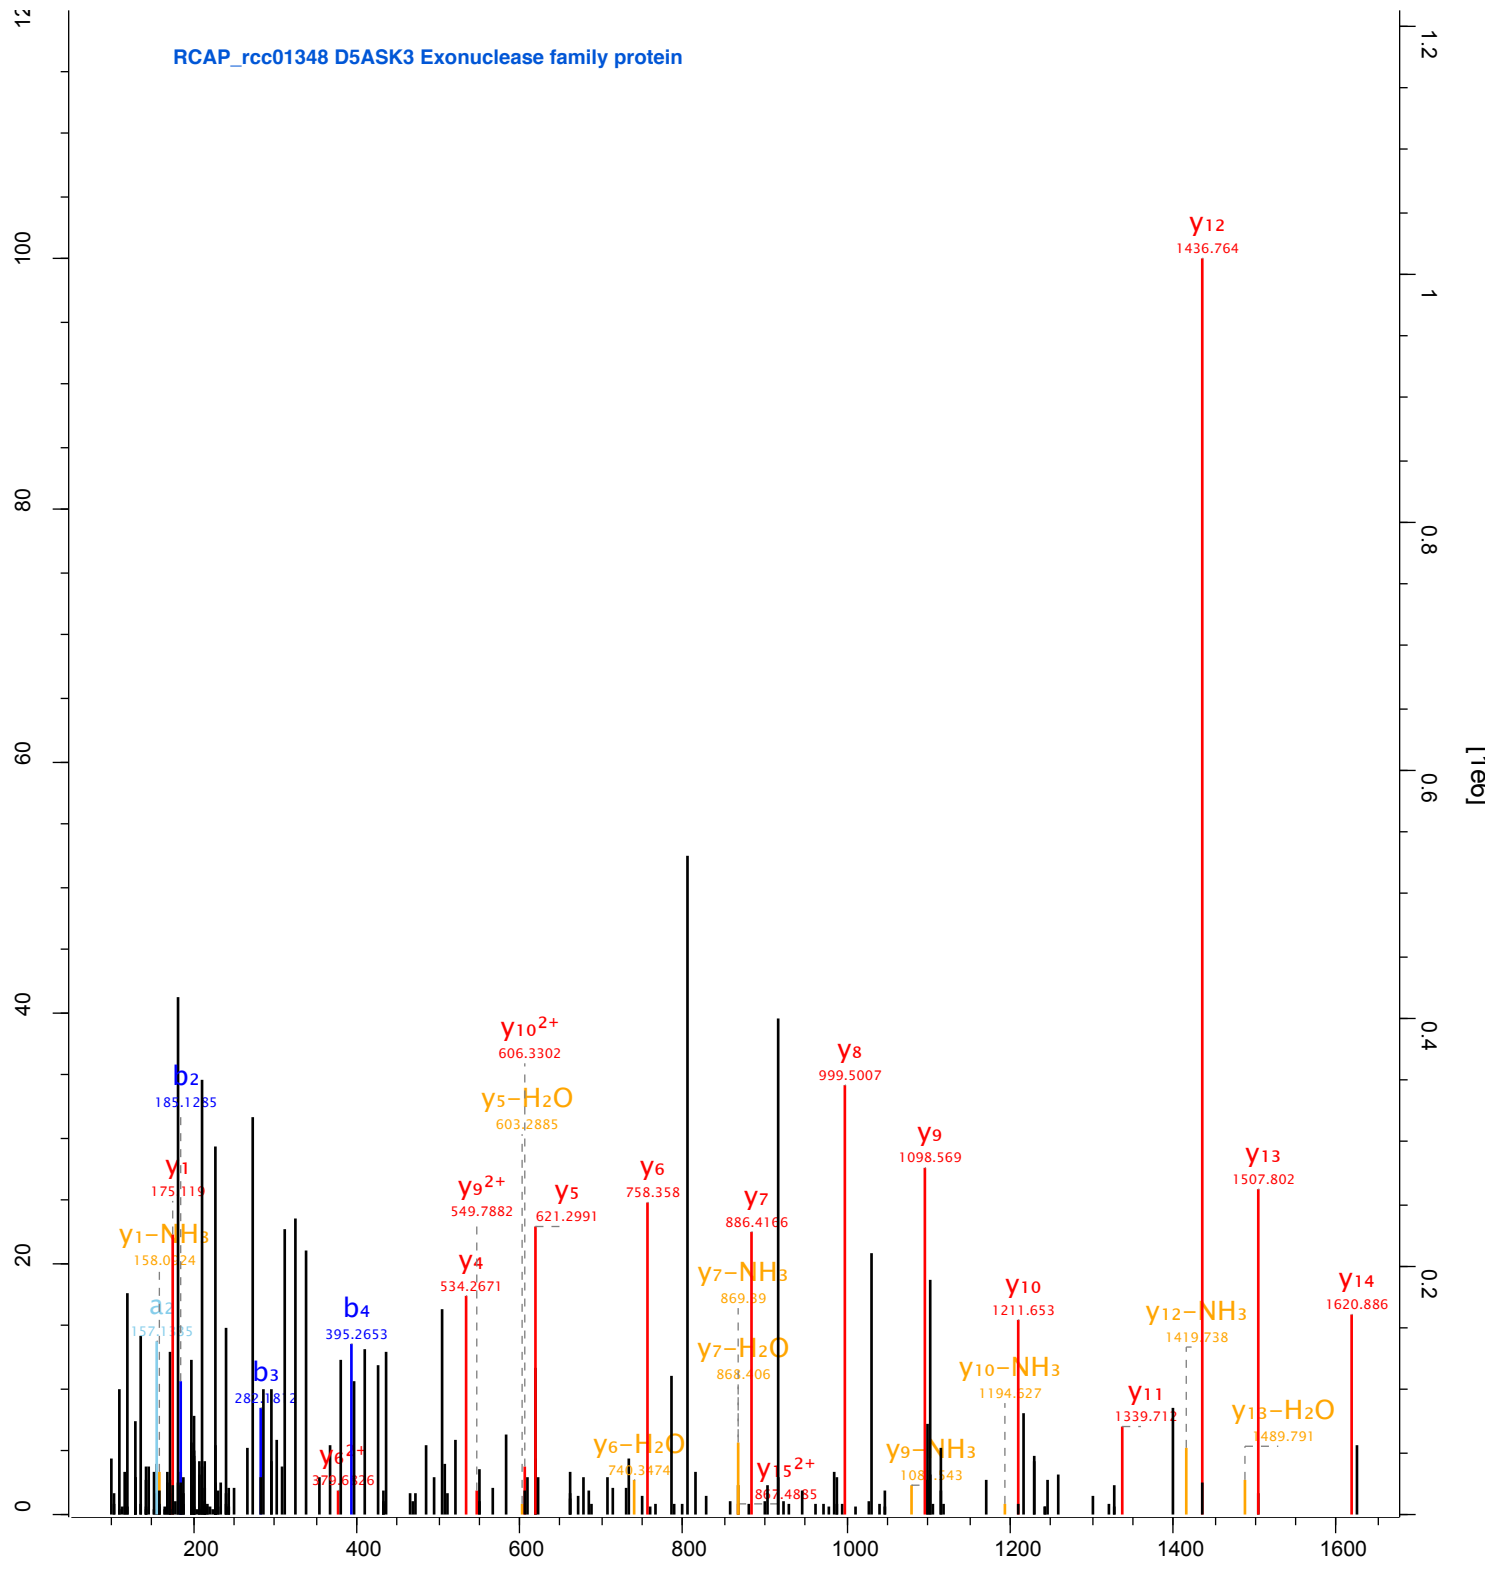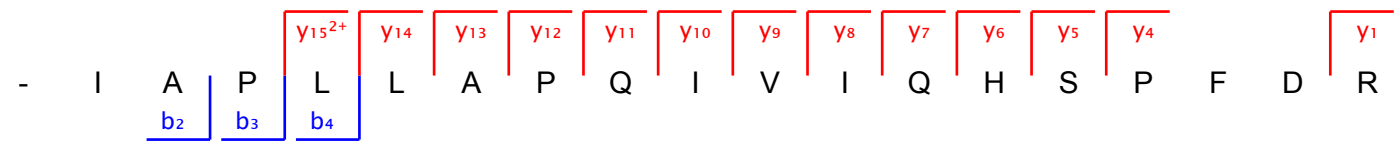



RCAP\_rcc01467 D5ATA5 Glycine cleavage system transcriptional activator

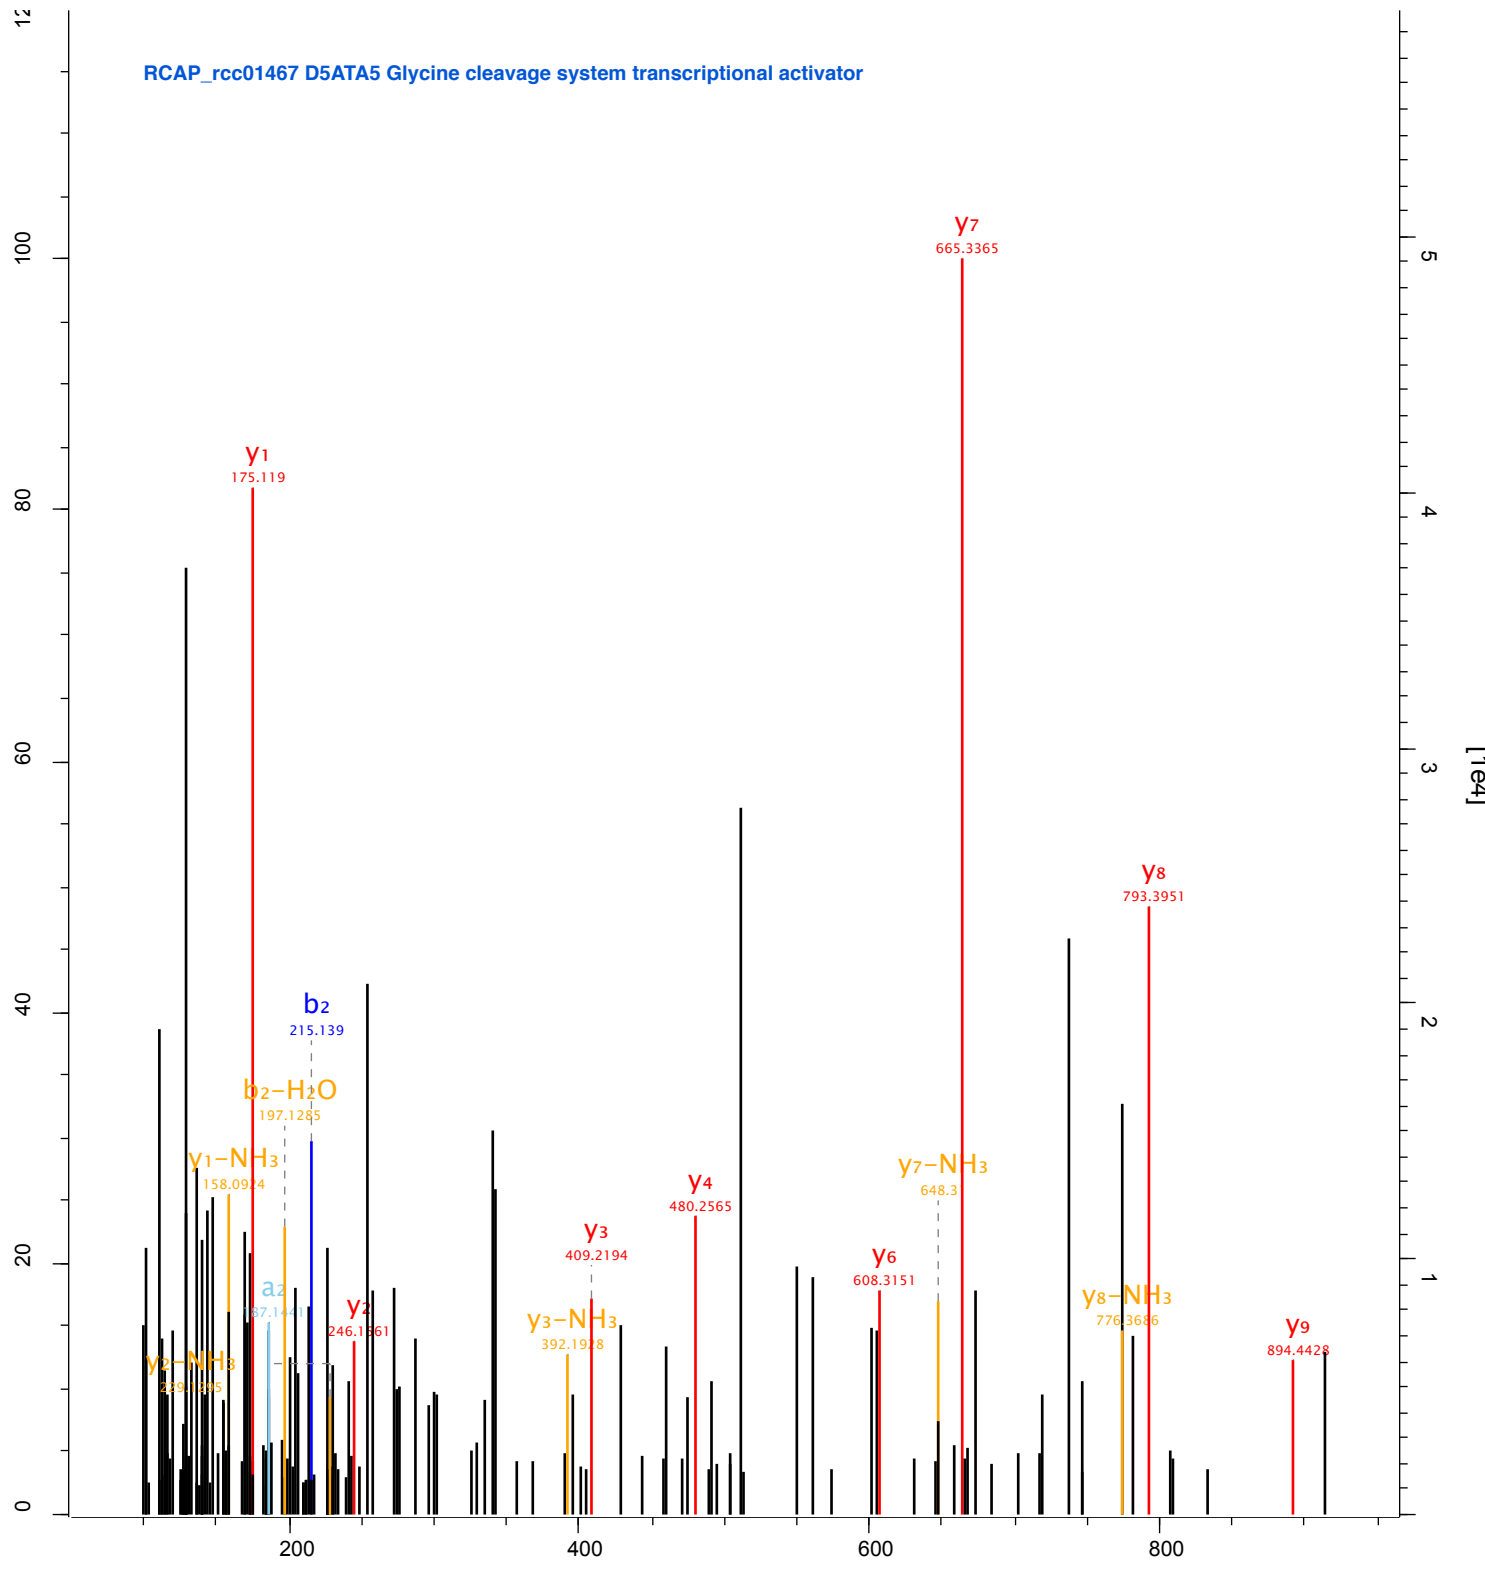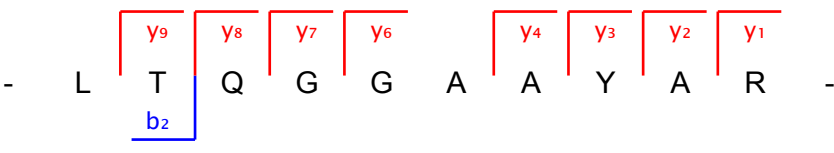

NCAP\_10001317\_D5A113\_NADH-quinone  
 oxidoreductase subunit A

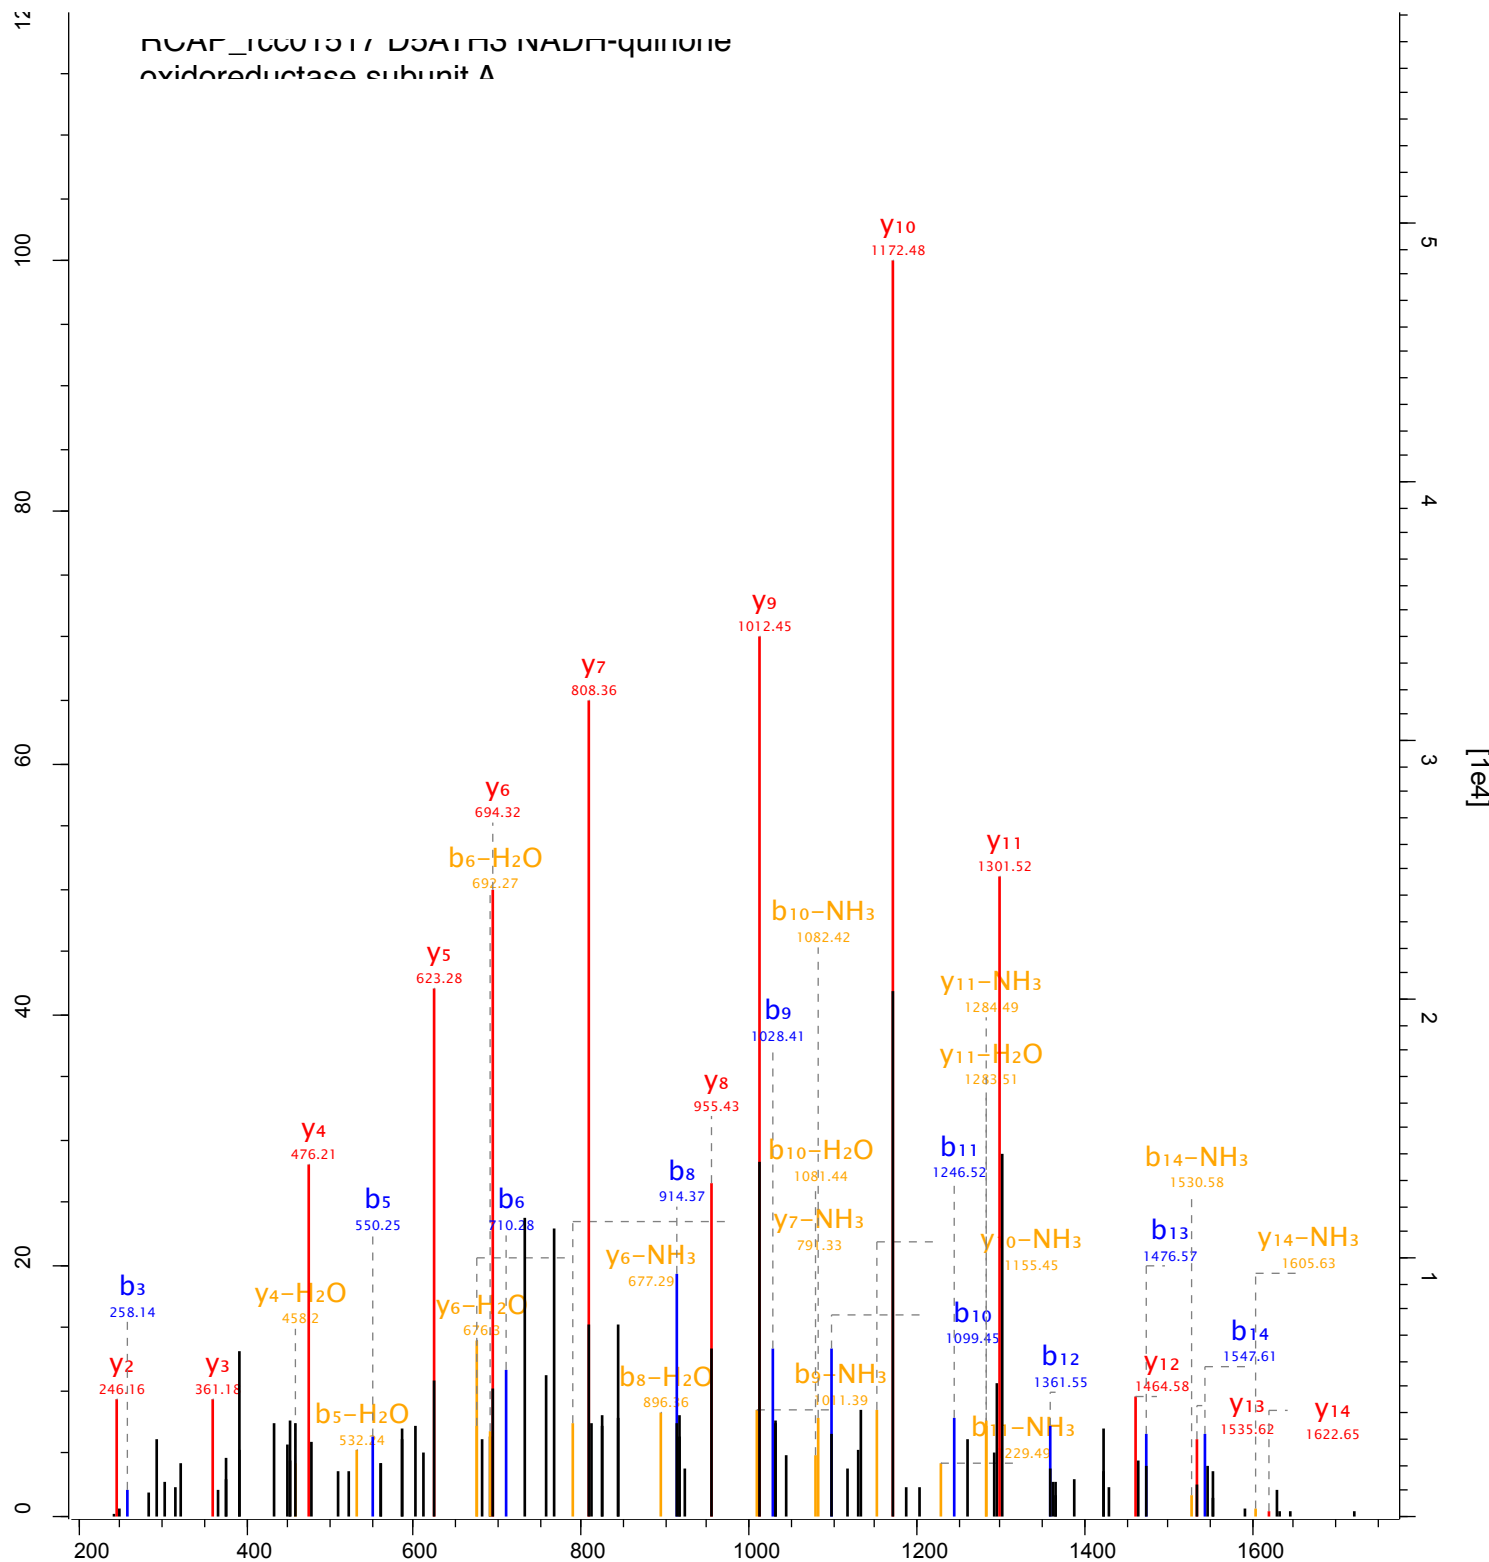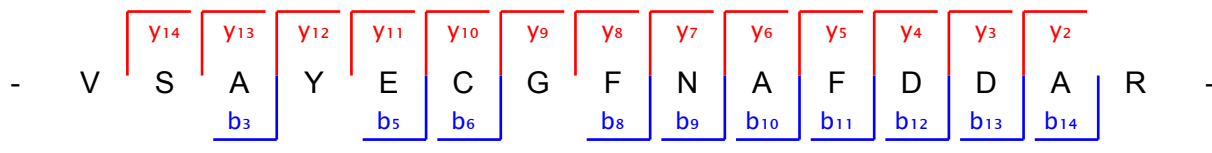

RCAP\_rcc01528 D5AT14 Uncharacterized protein

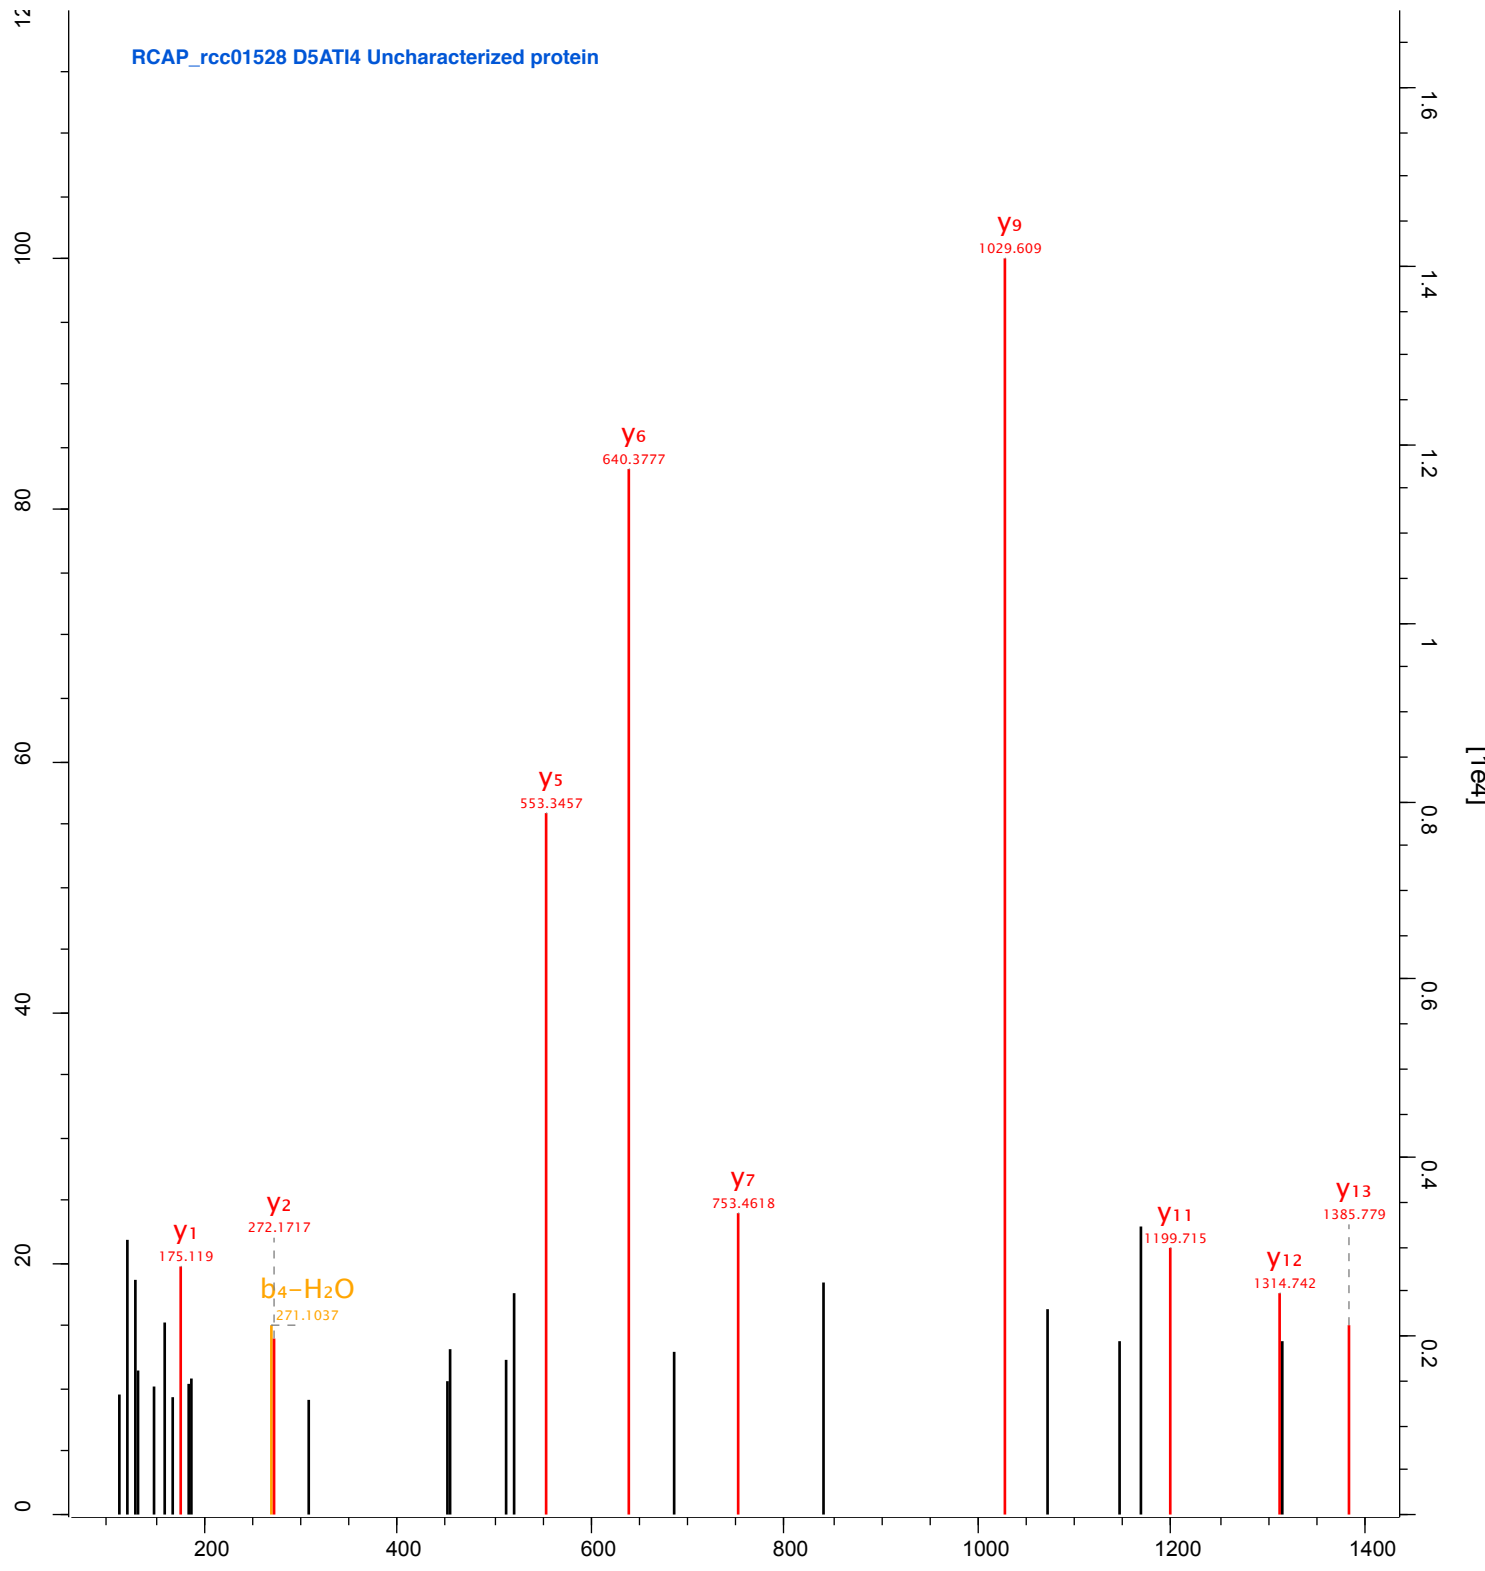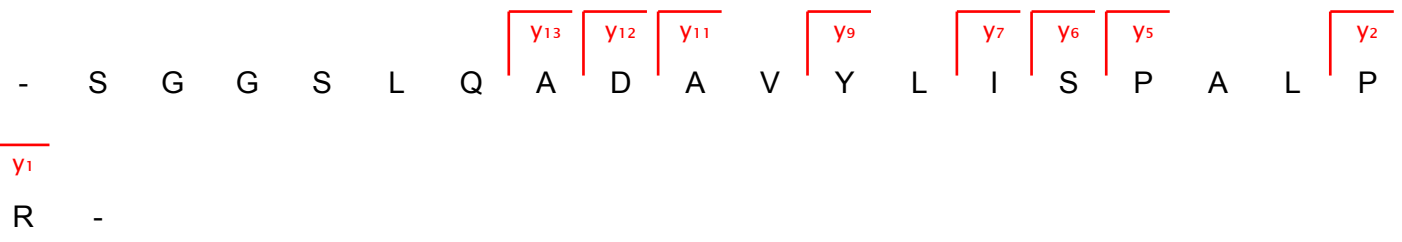

RCAP\_rcc01601 D5ATQ7 FeS assembly SUF system protein

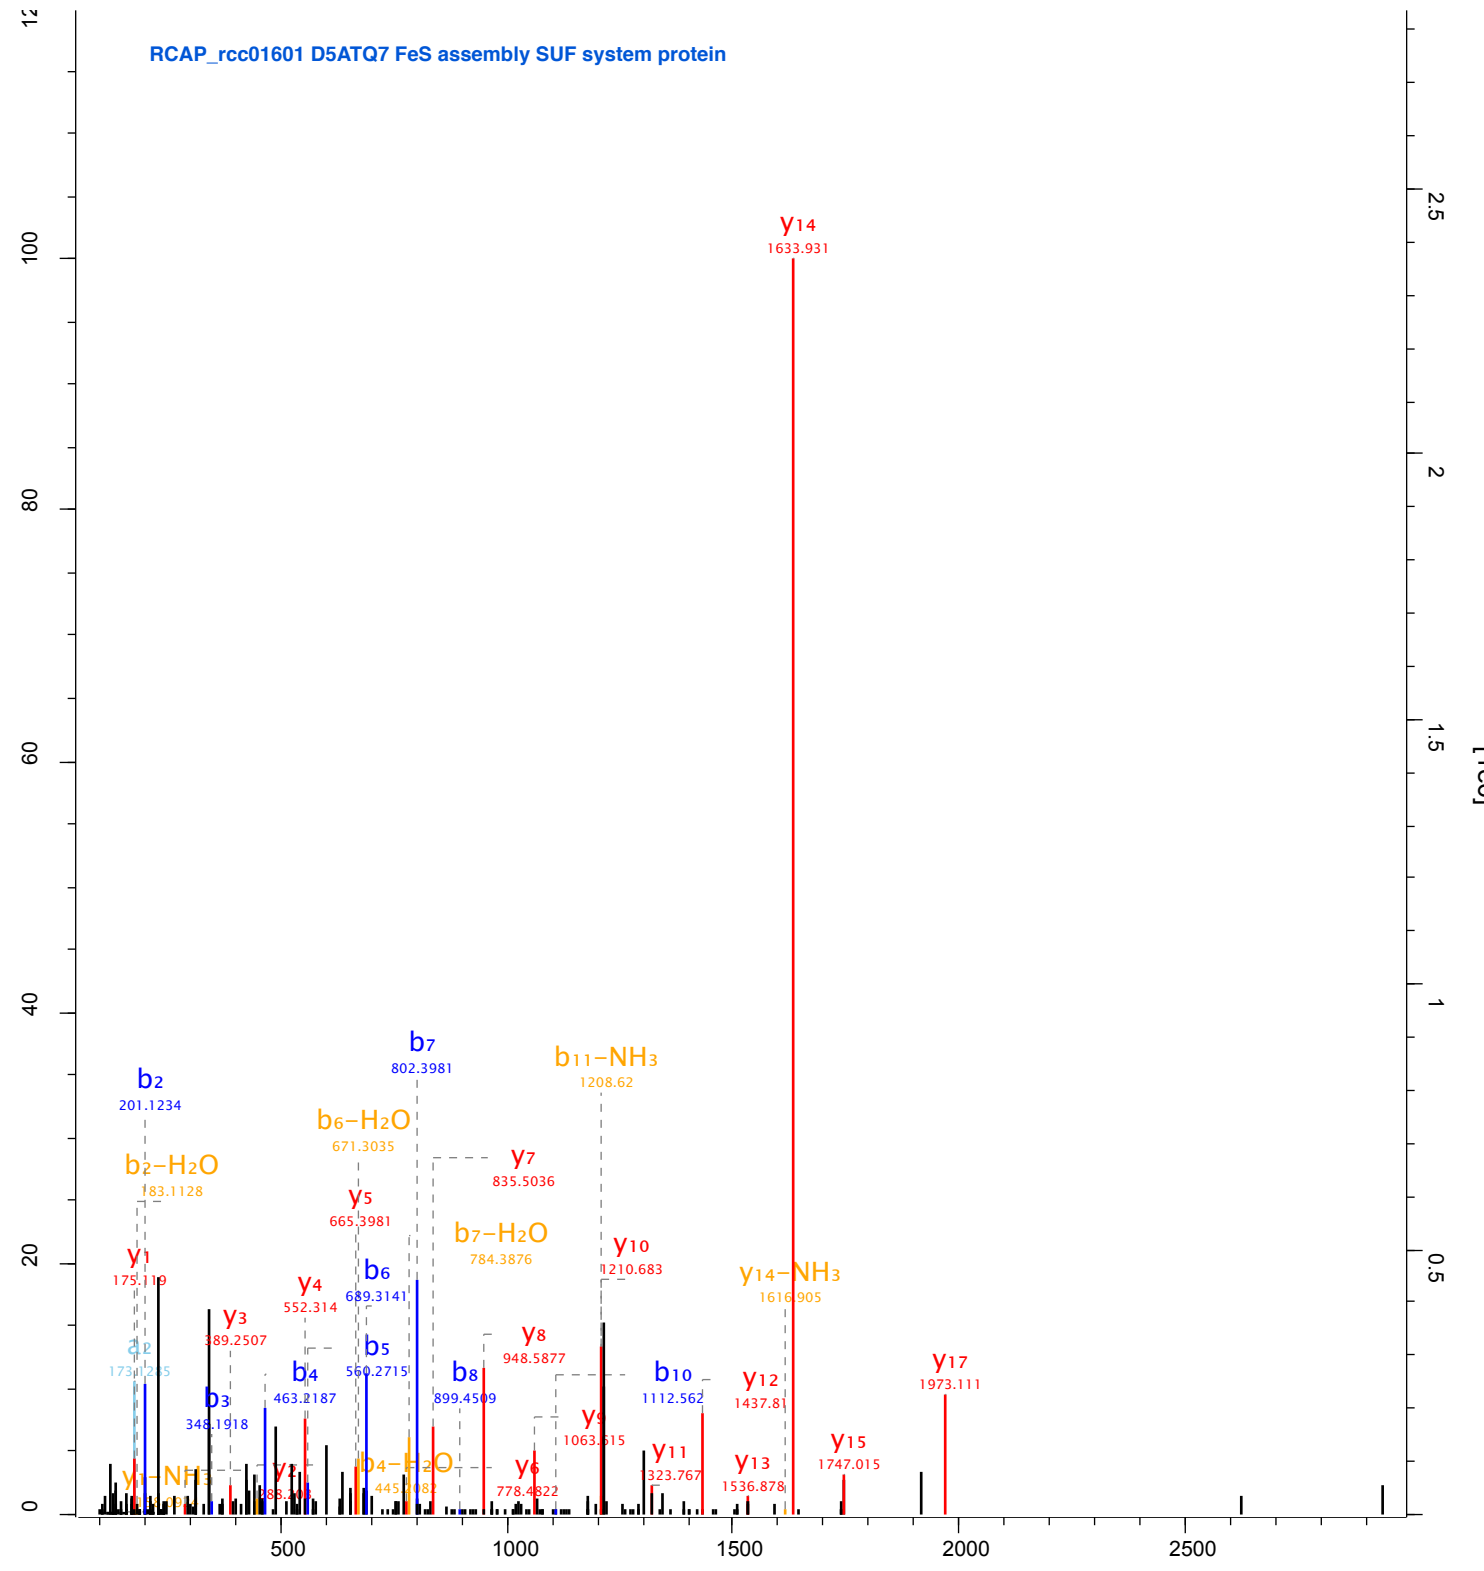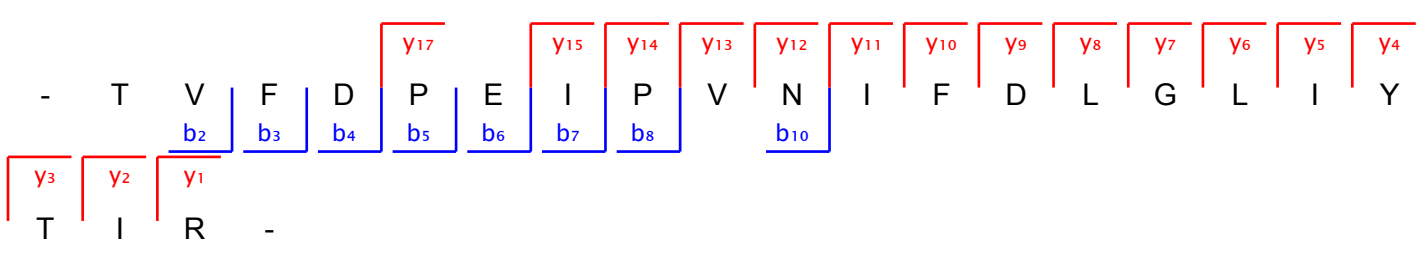

RCAP\_rcc01627 D5ATT3 Isoprenyl transferase

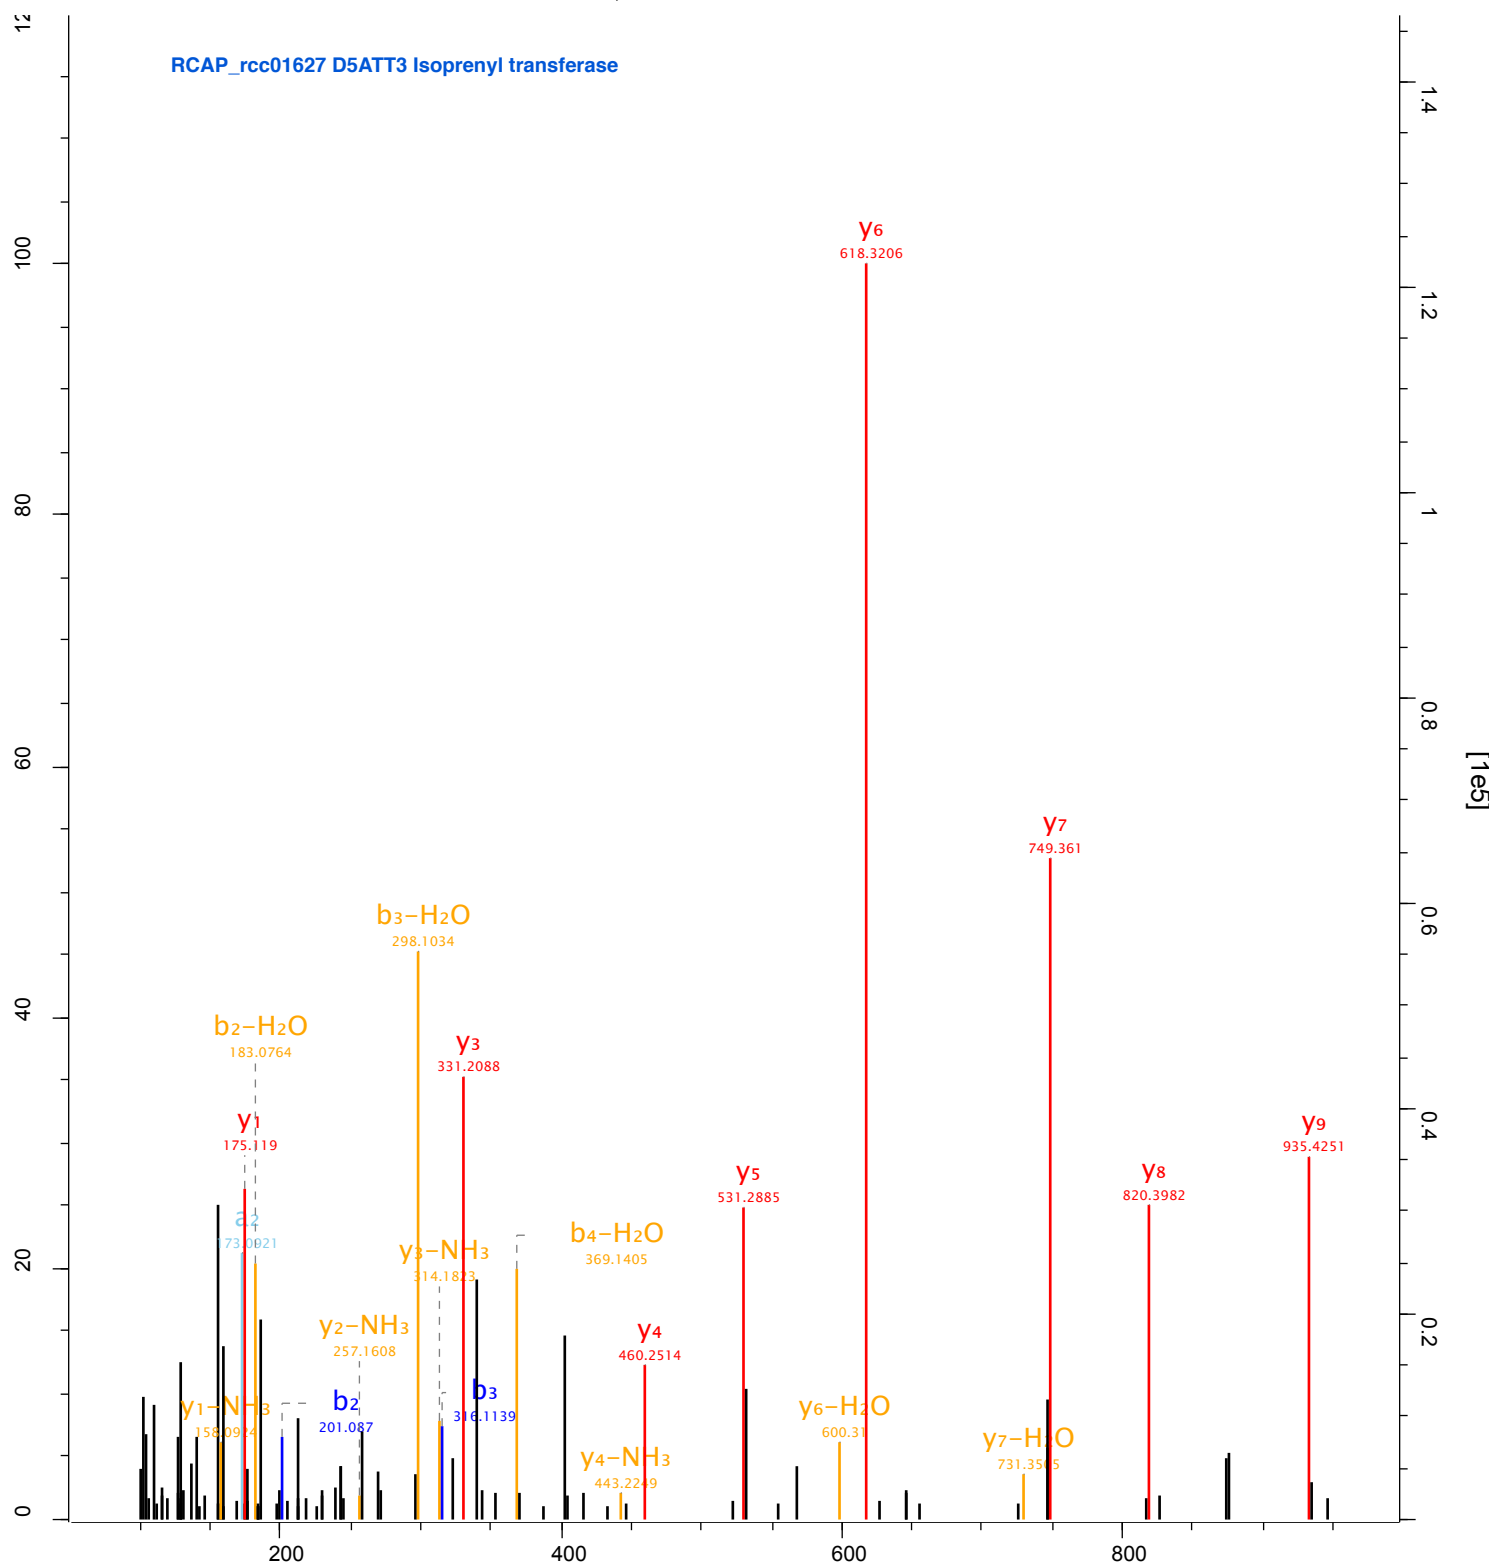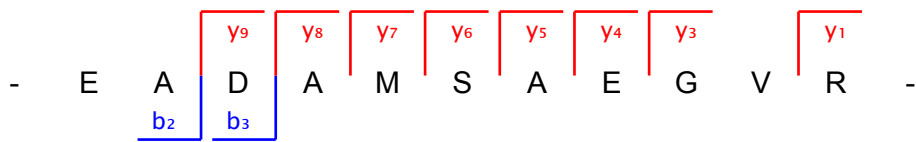

RCAP\_rcc01634 D5ATU0 3-hydroxyacyl-[acyl-carrier-protein] dehydratase FabZ

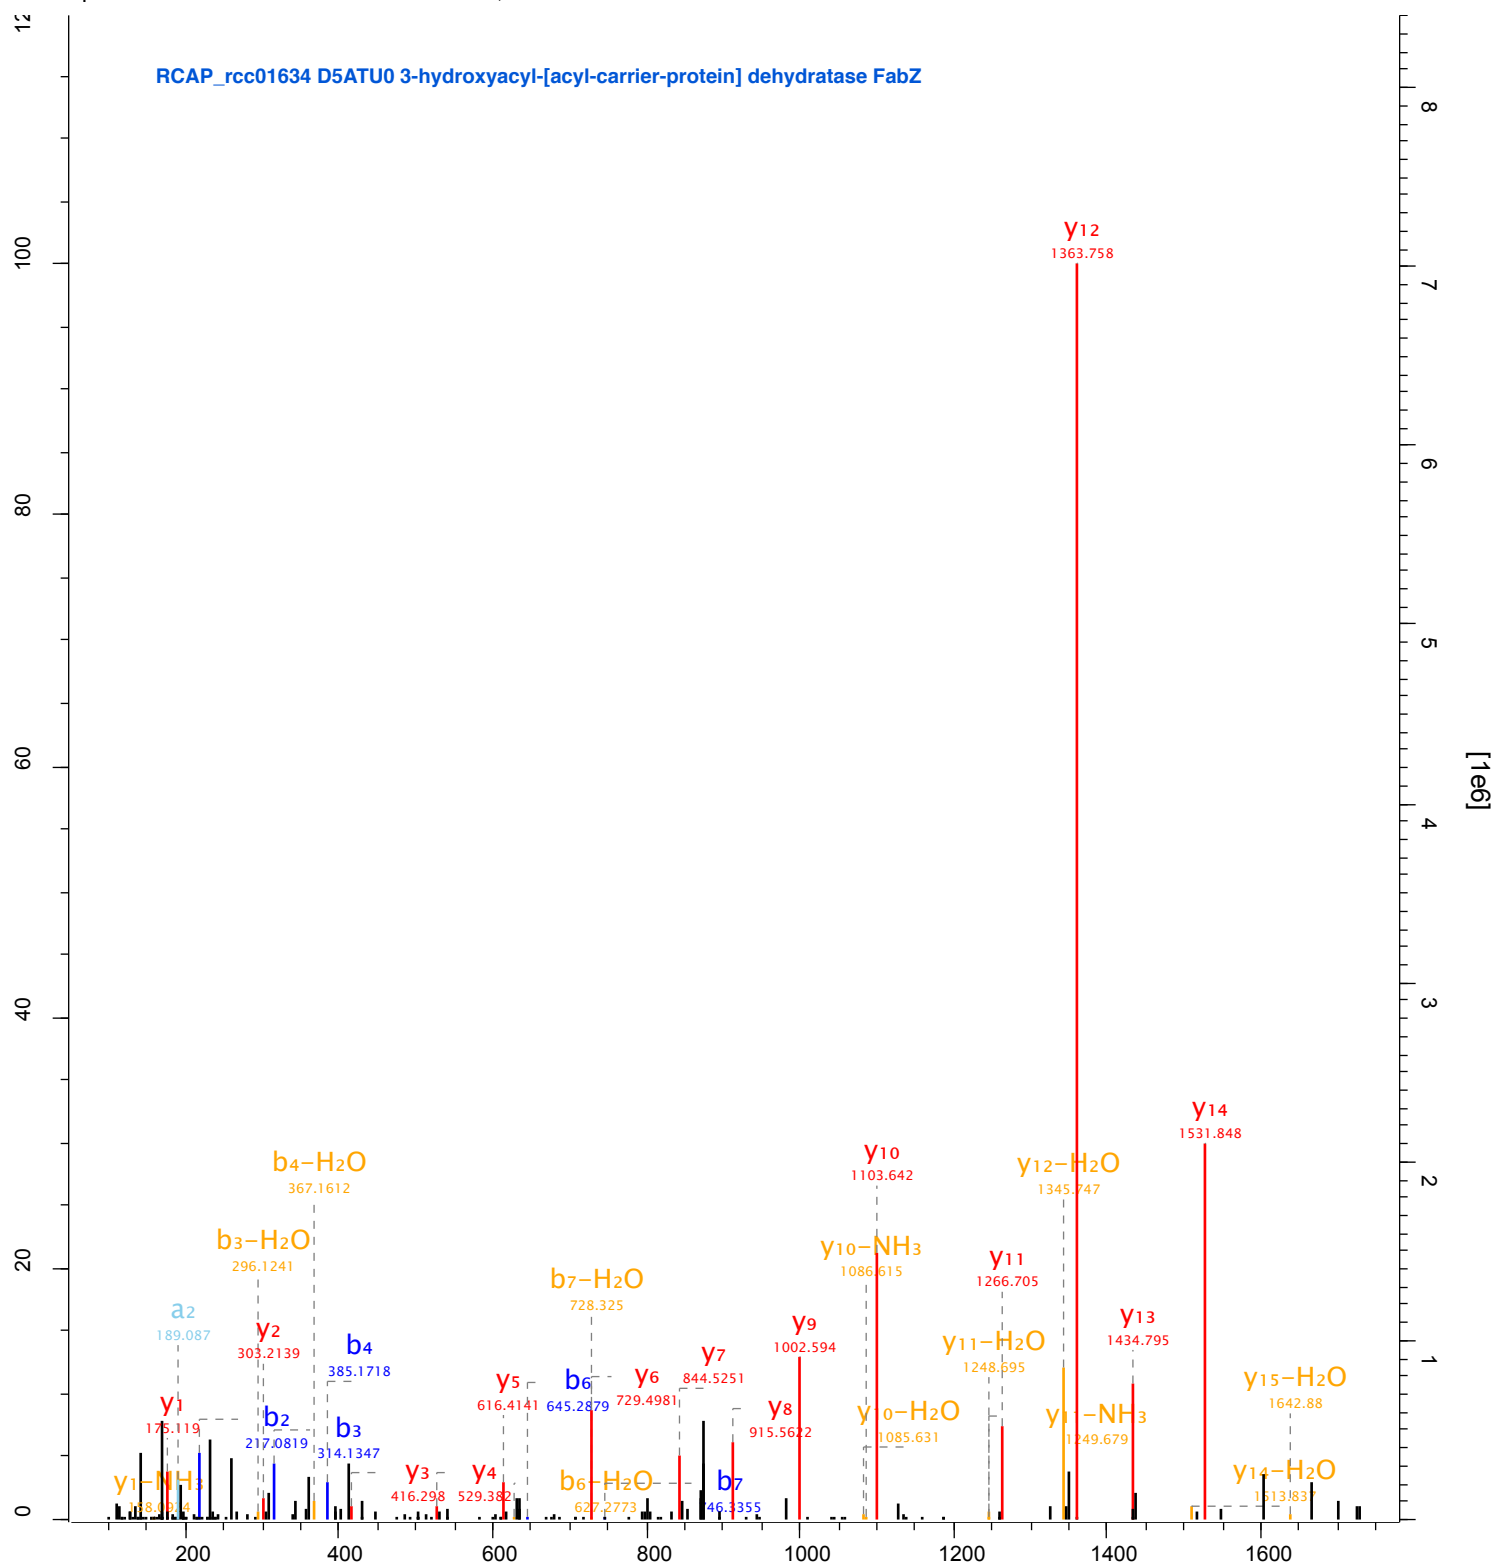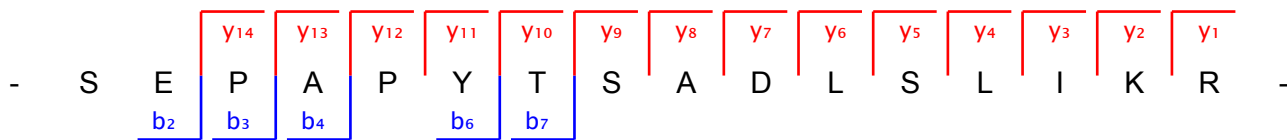

RCAP\_rcc01894 D5AUK0 Polyamine ABC transporter, permease protein PotI-2

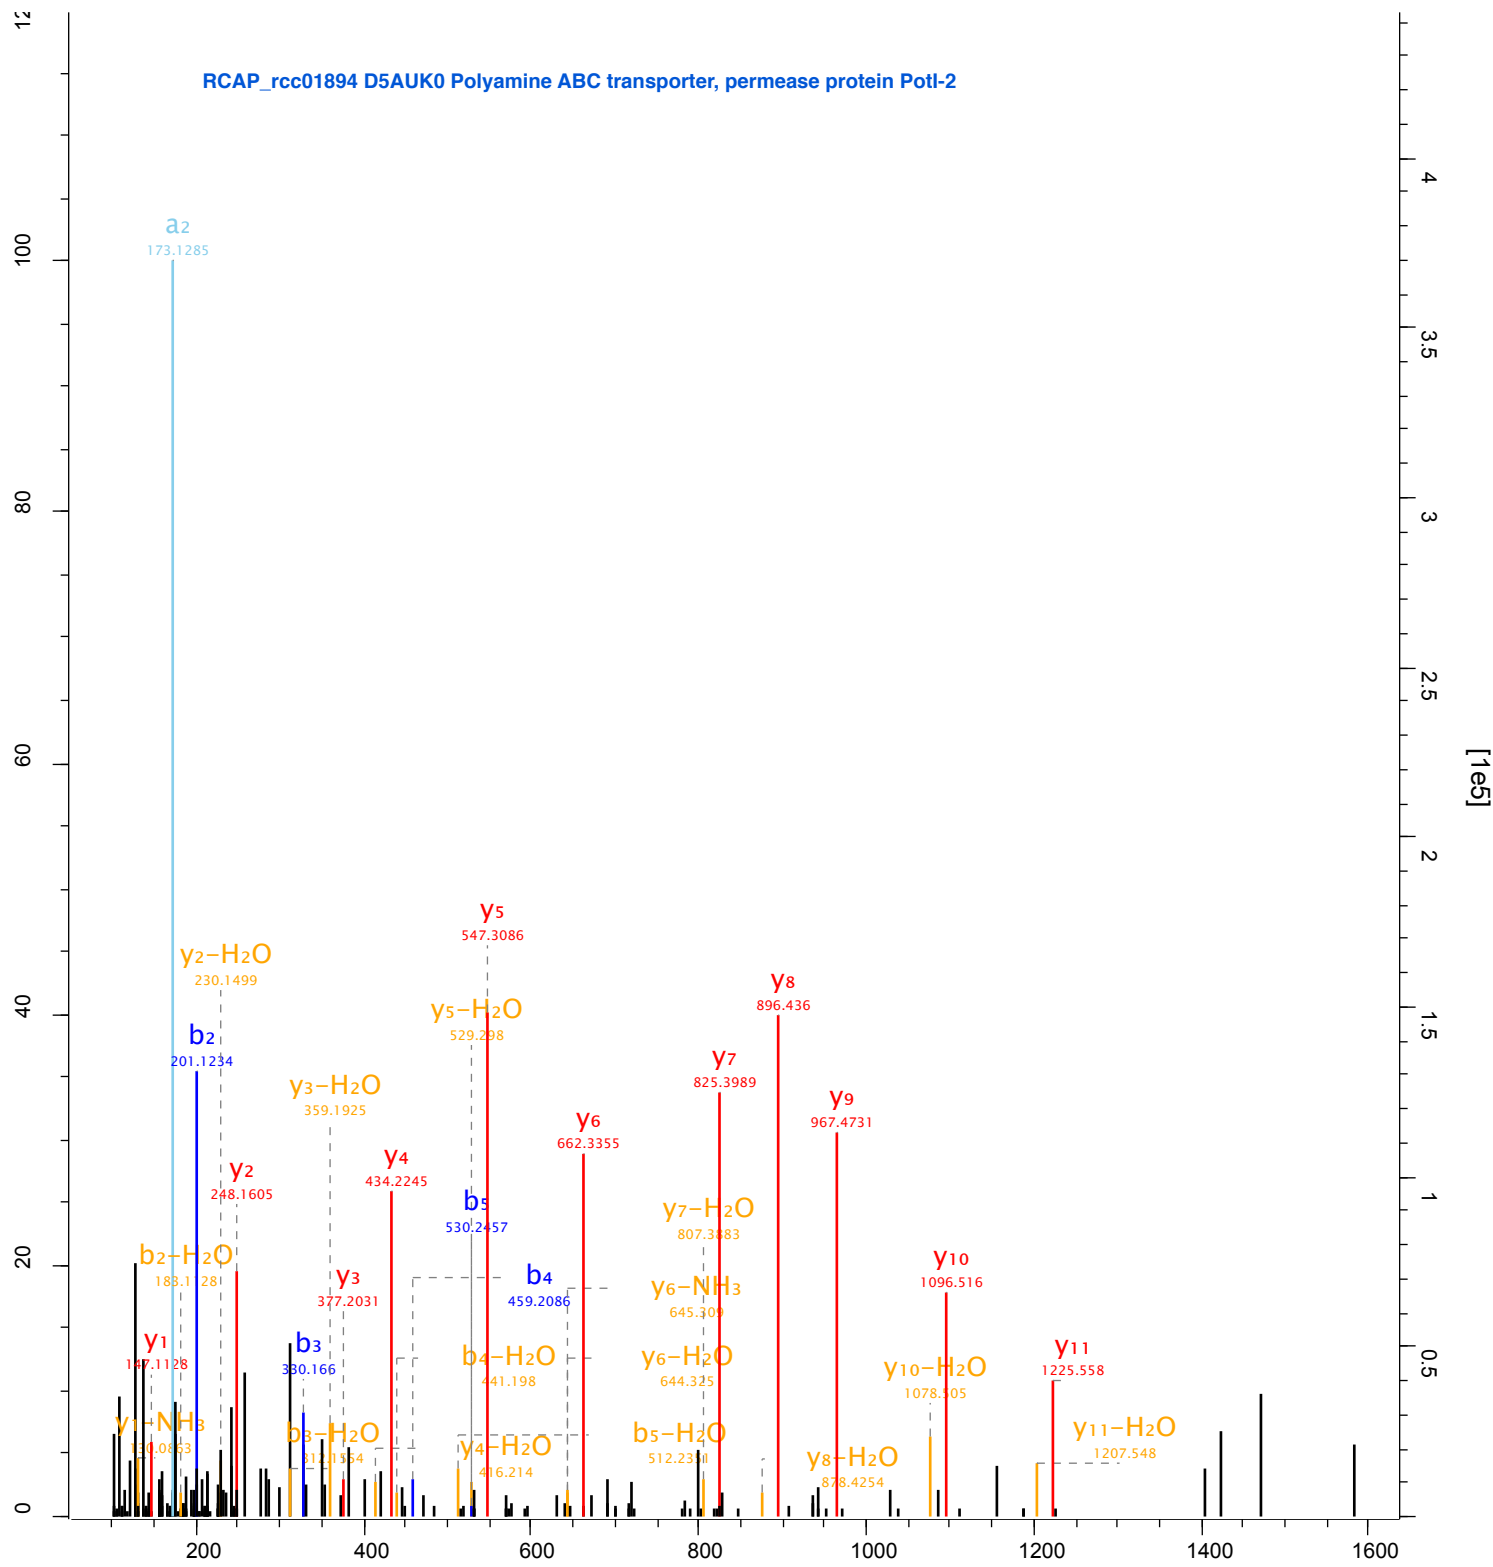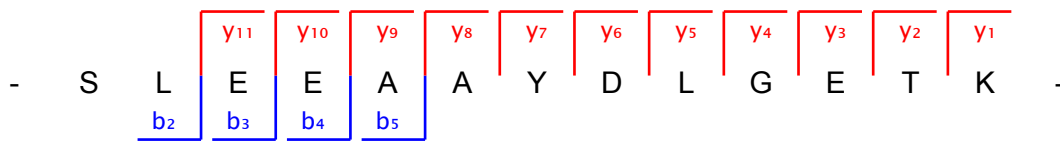

NCAP\_10001933\_DSAU10  
 Uncharacterized protein

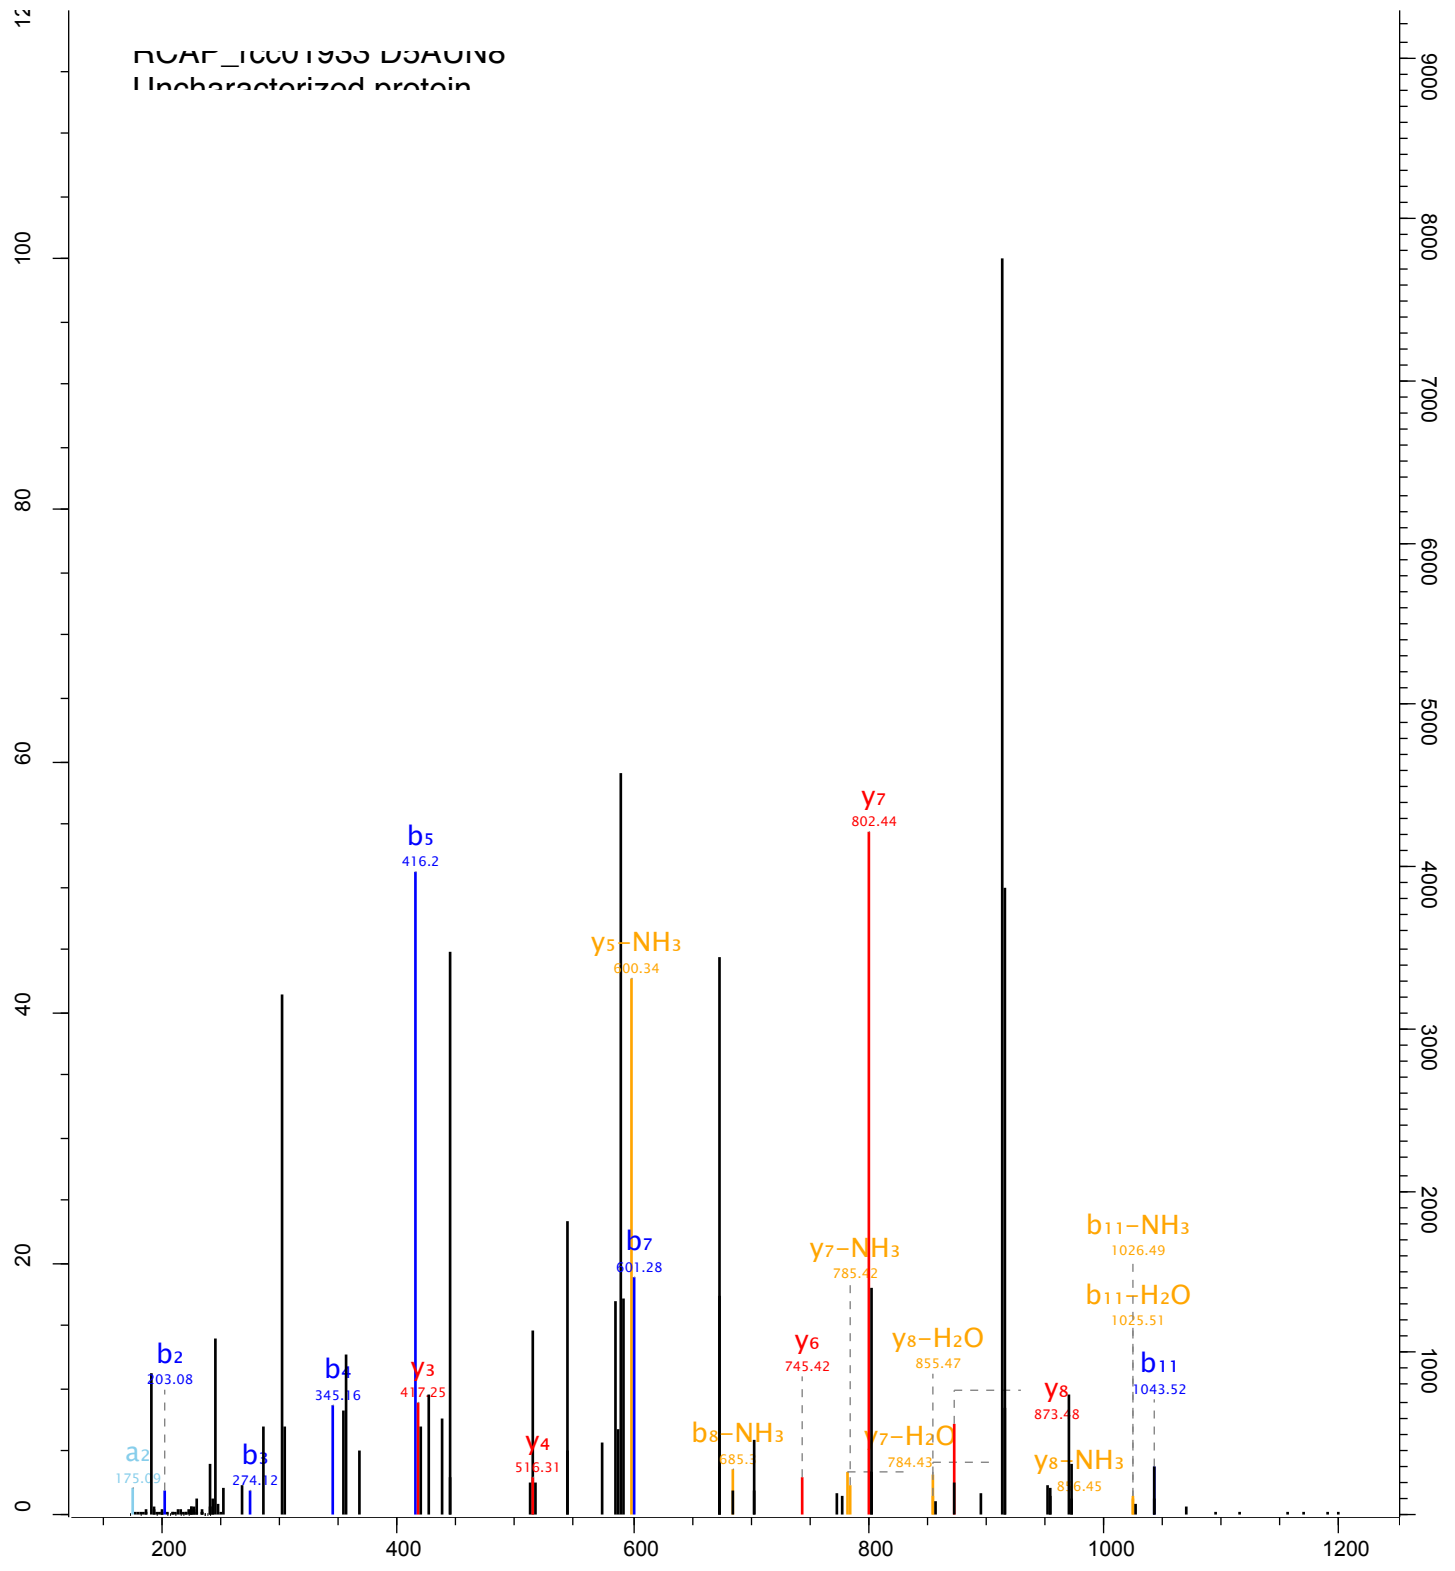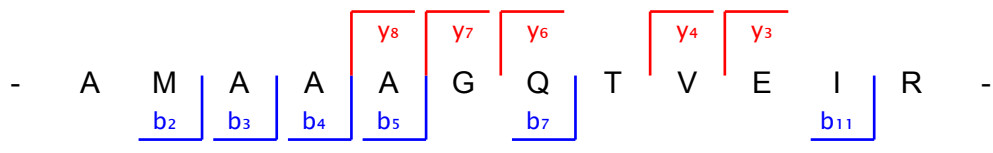



RCAP\_rcc01938 D5AUP3 Membrane protein, putative

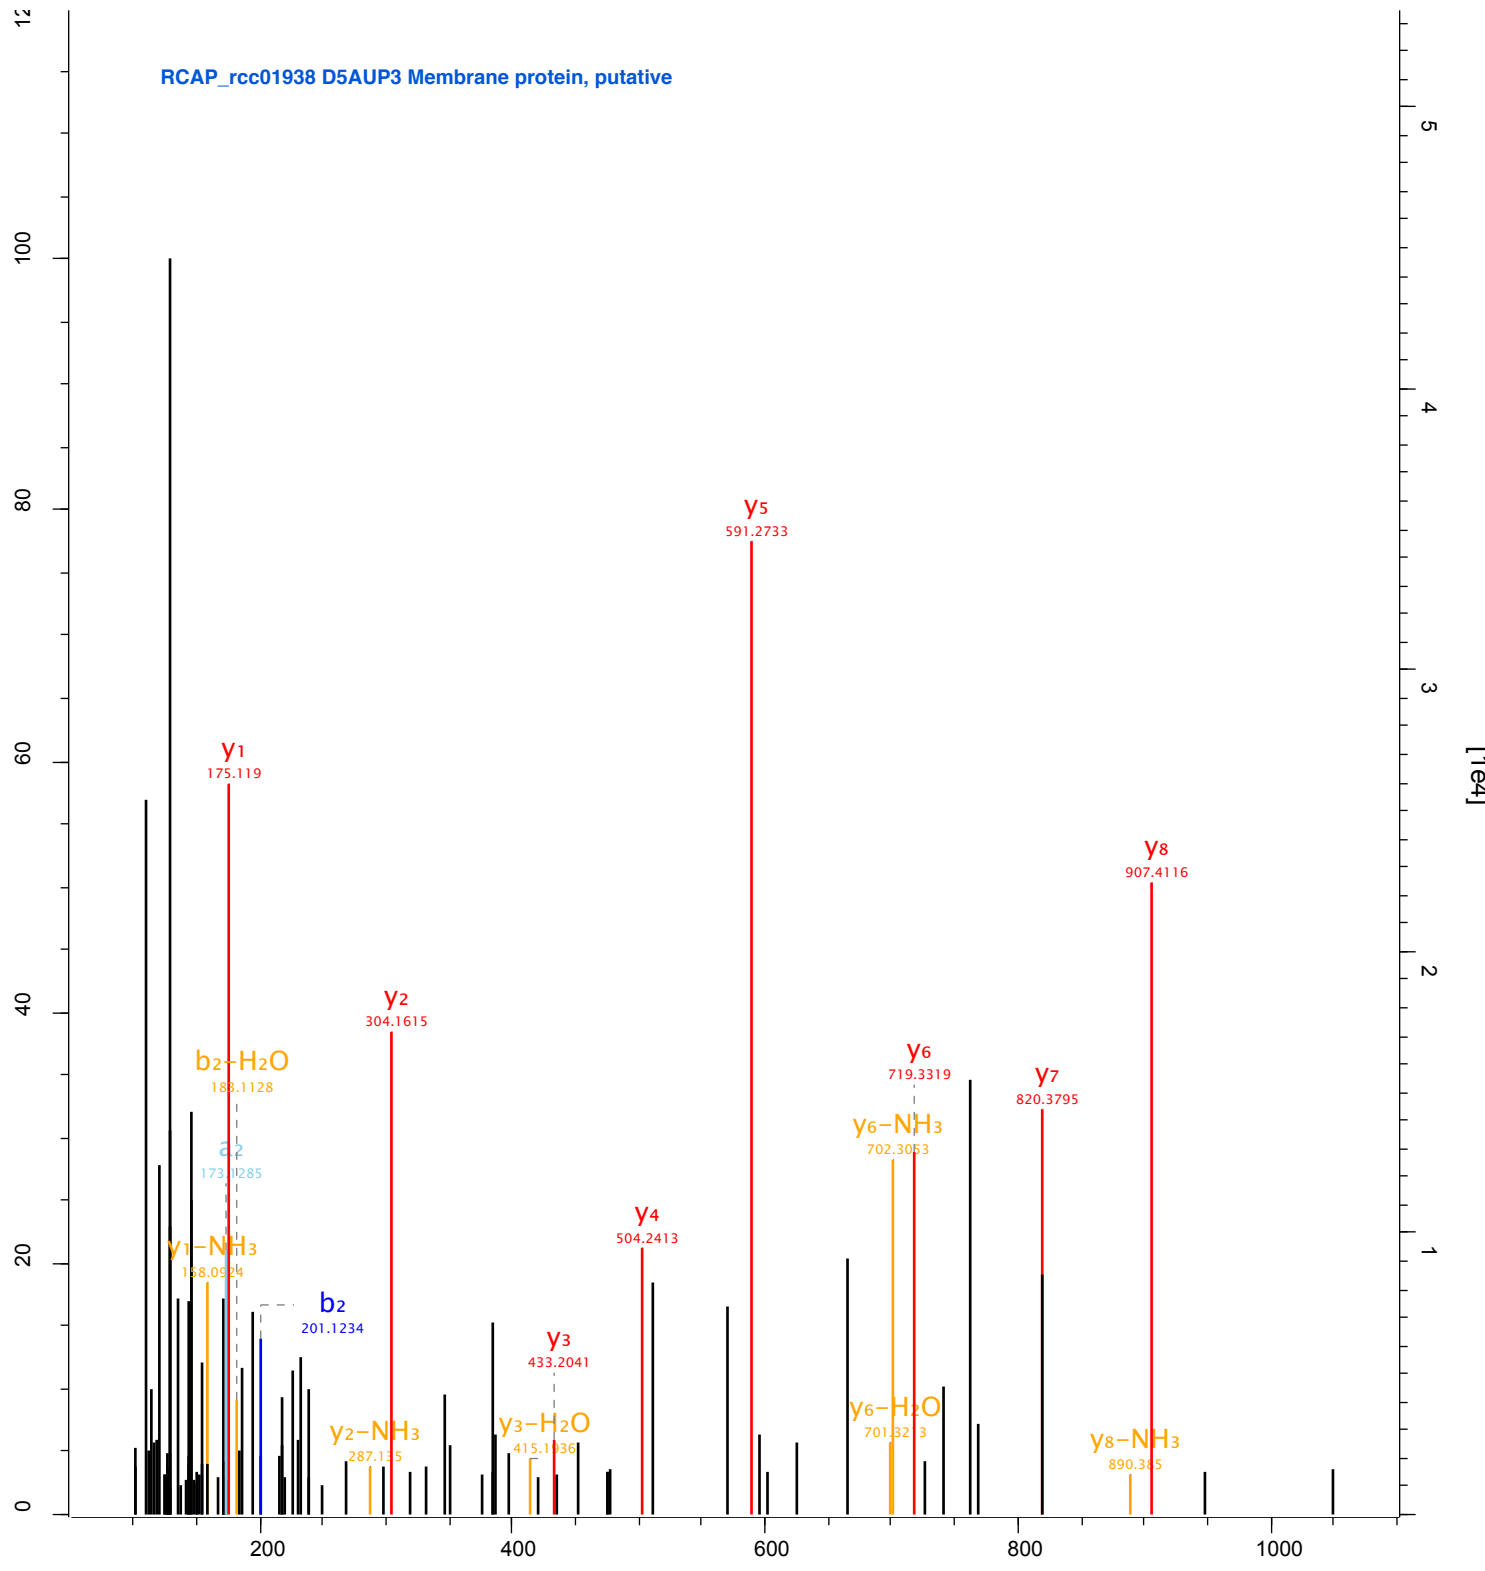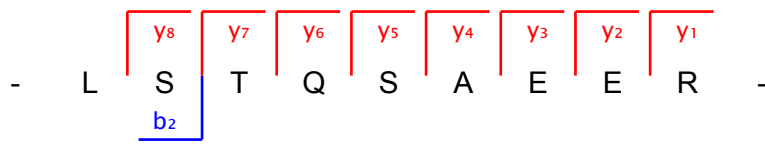

RCAP\_rcc02041 D5AV03 Cobalamin biosynthesis protein CbiG

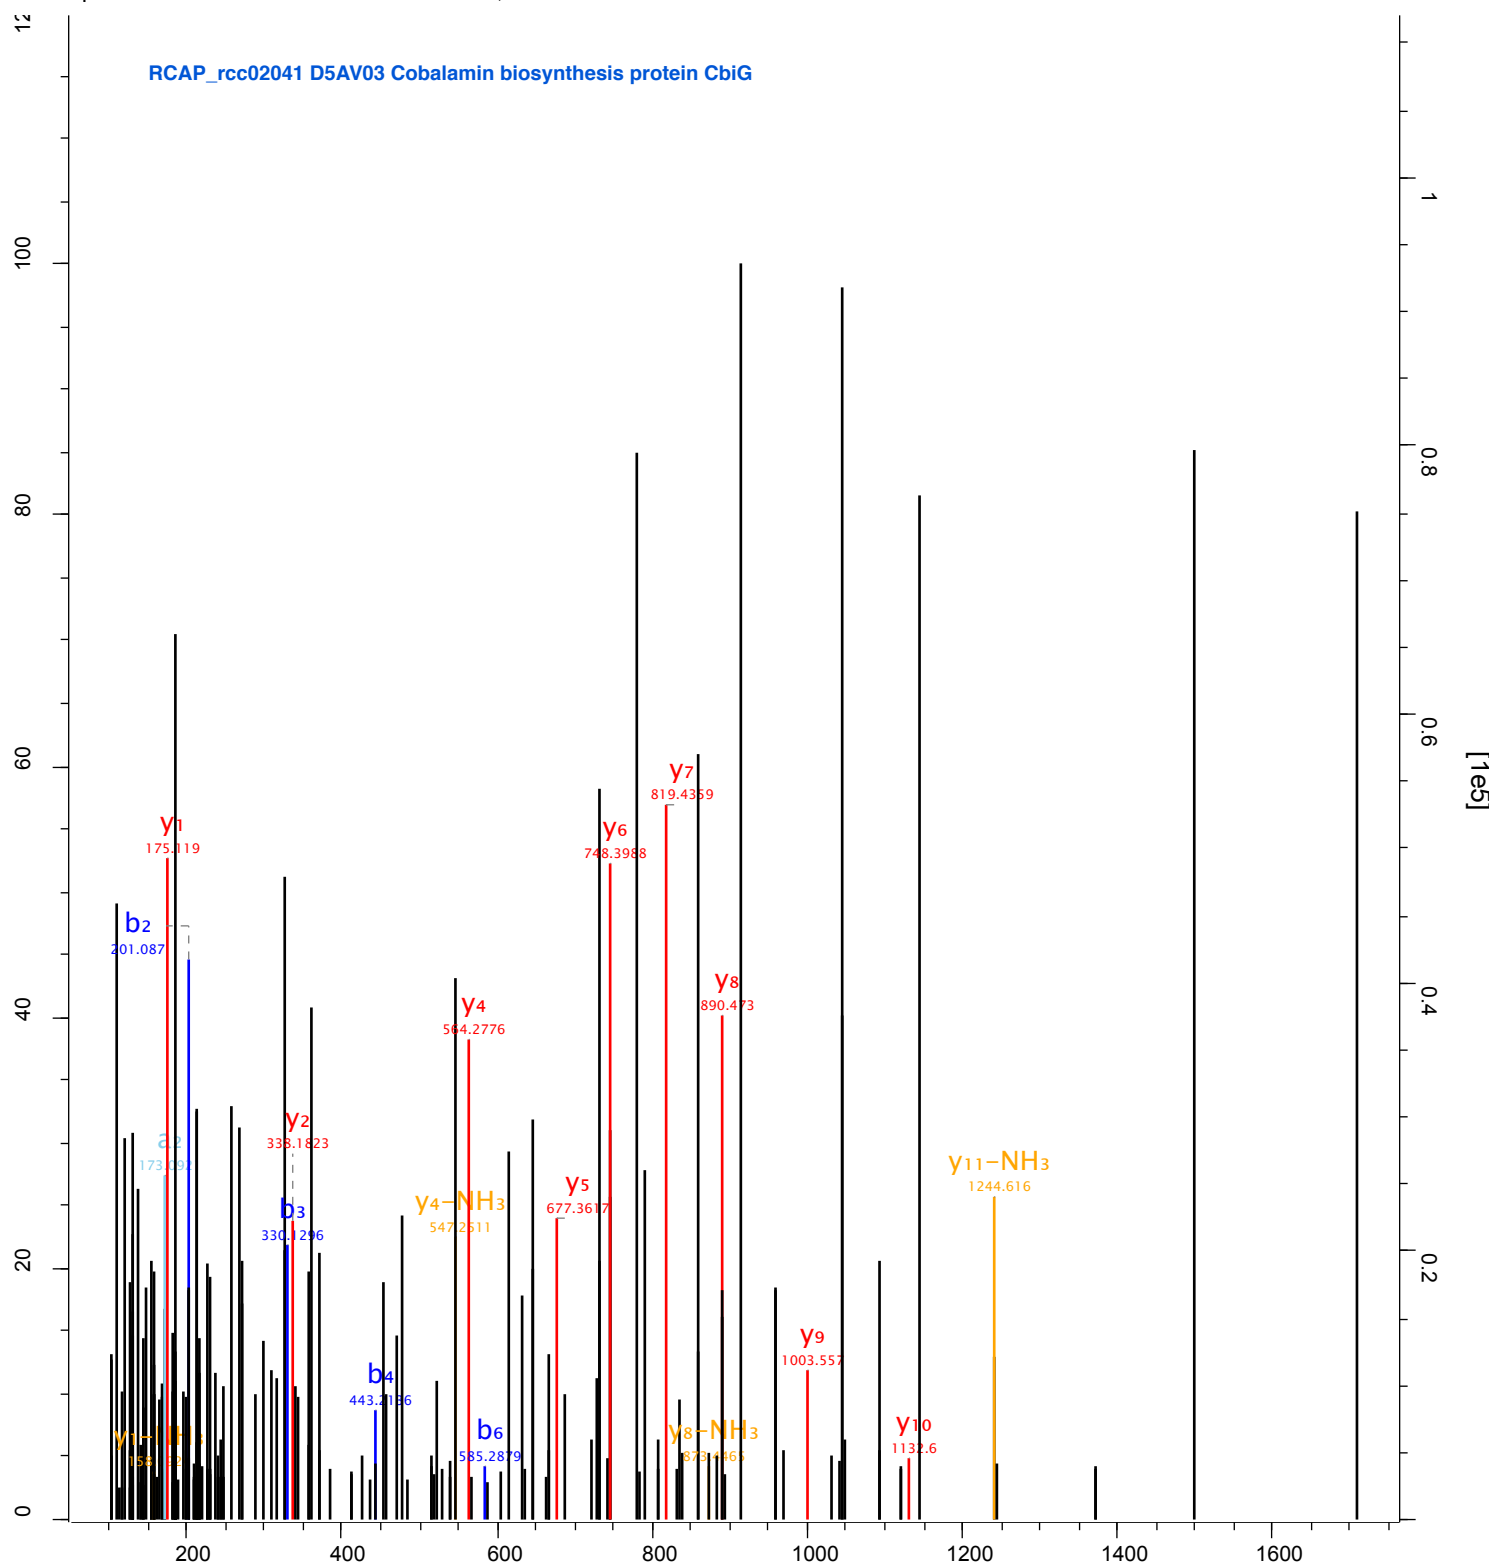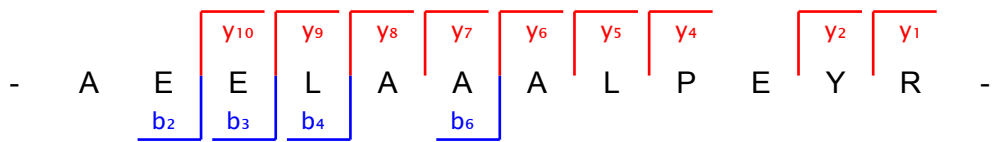

RCAP\_rcc02152 D5AVA0 TM2 domain protein

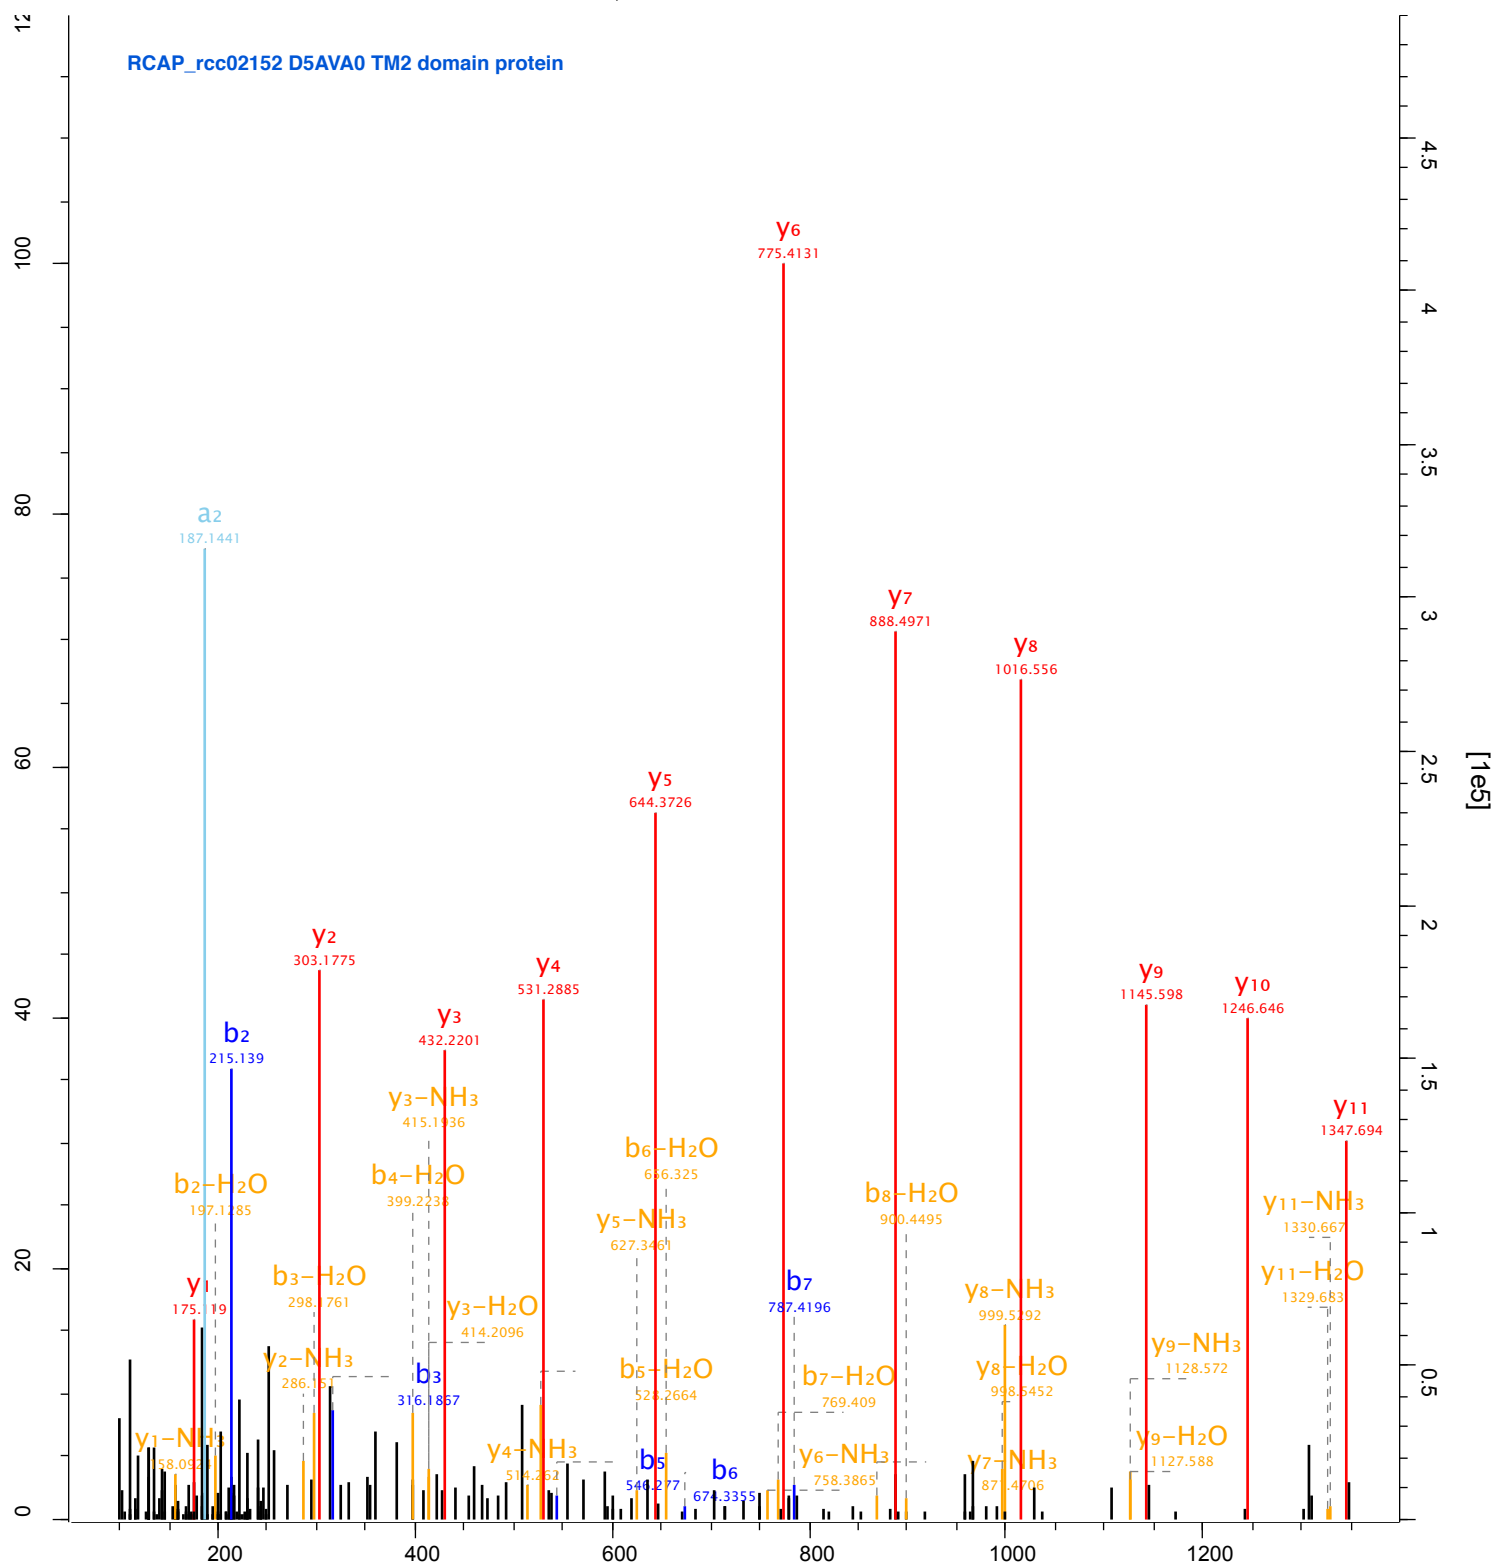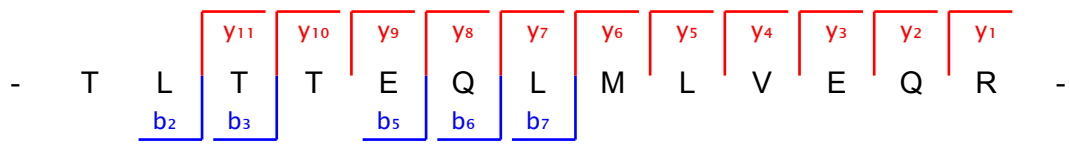

RCAP\_rcc02158 D5AVA6 Flagellar motor switch protein Flg

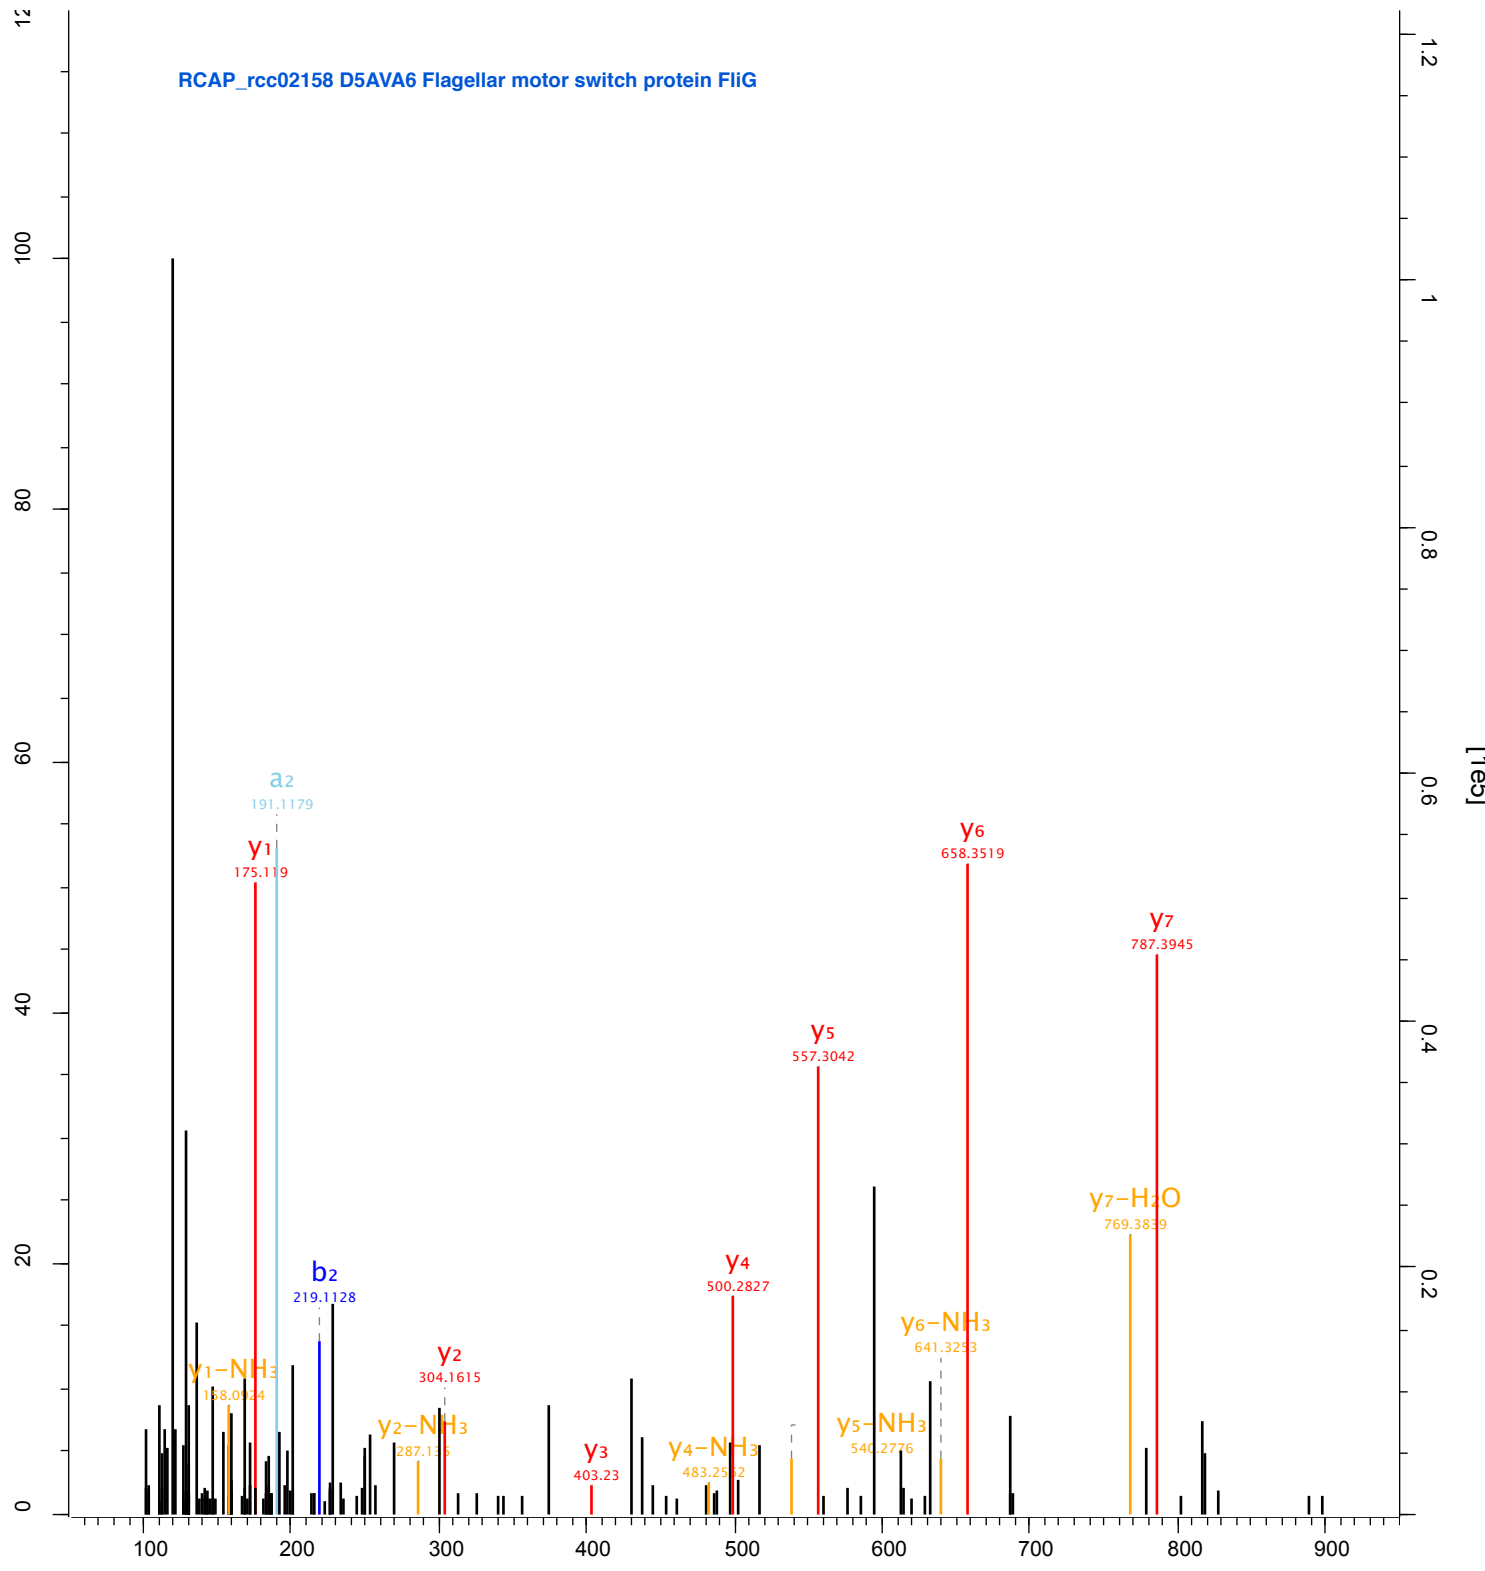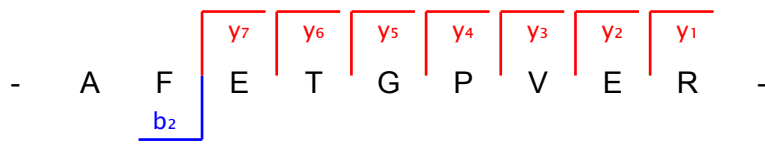

RCAP\_rcc02209 D5AKU9 Propanediol utilization protein PduA-2

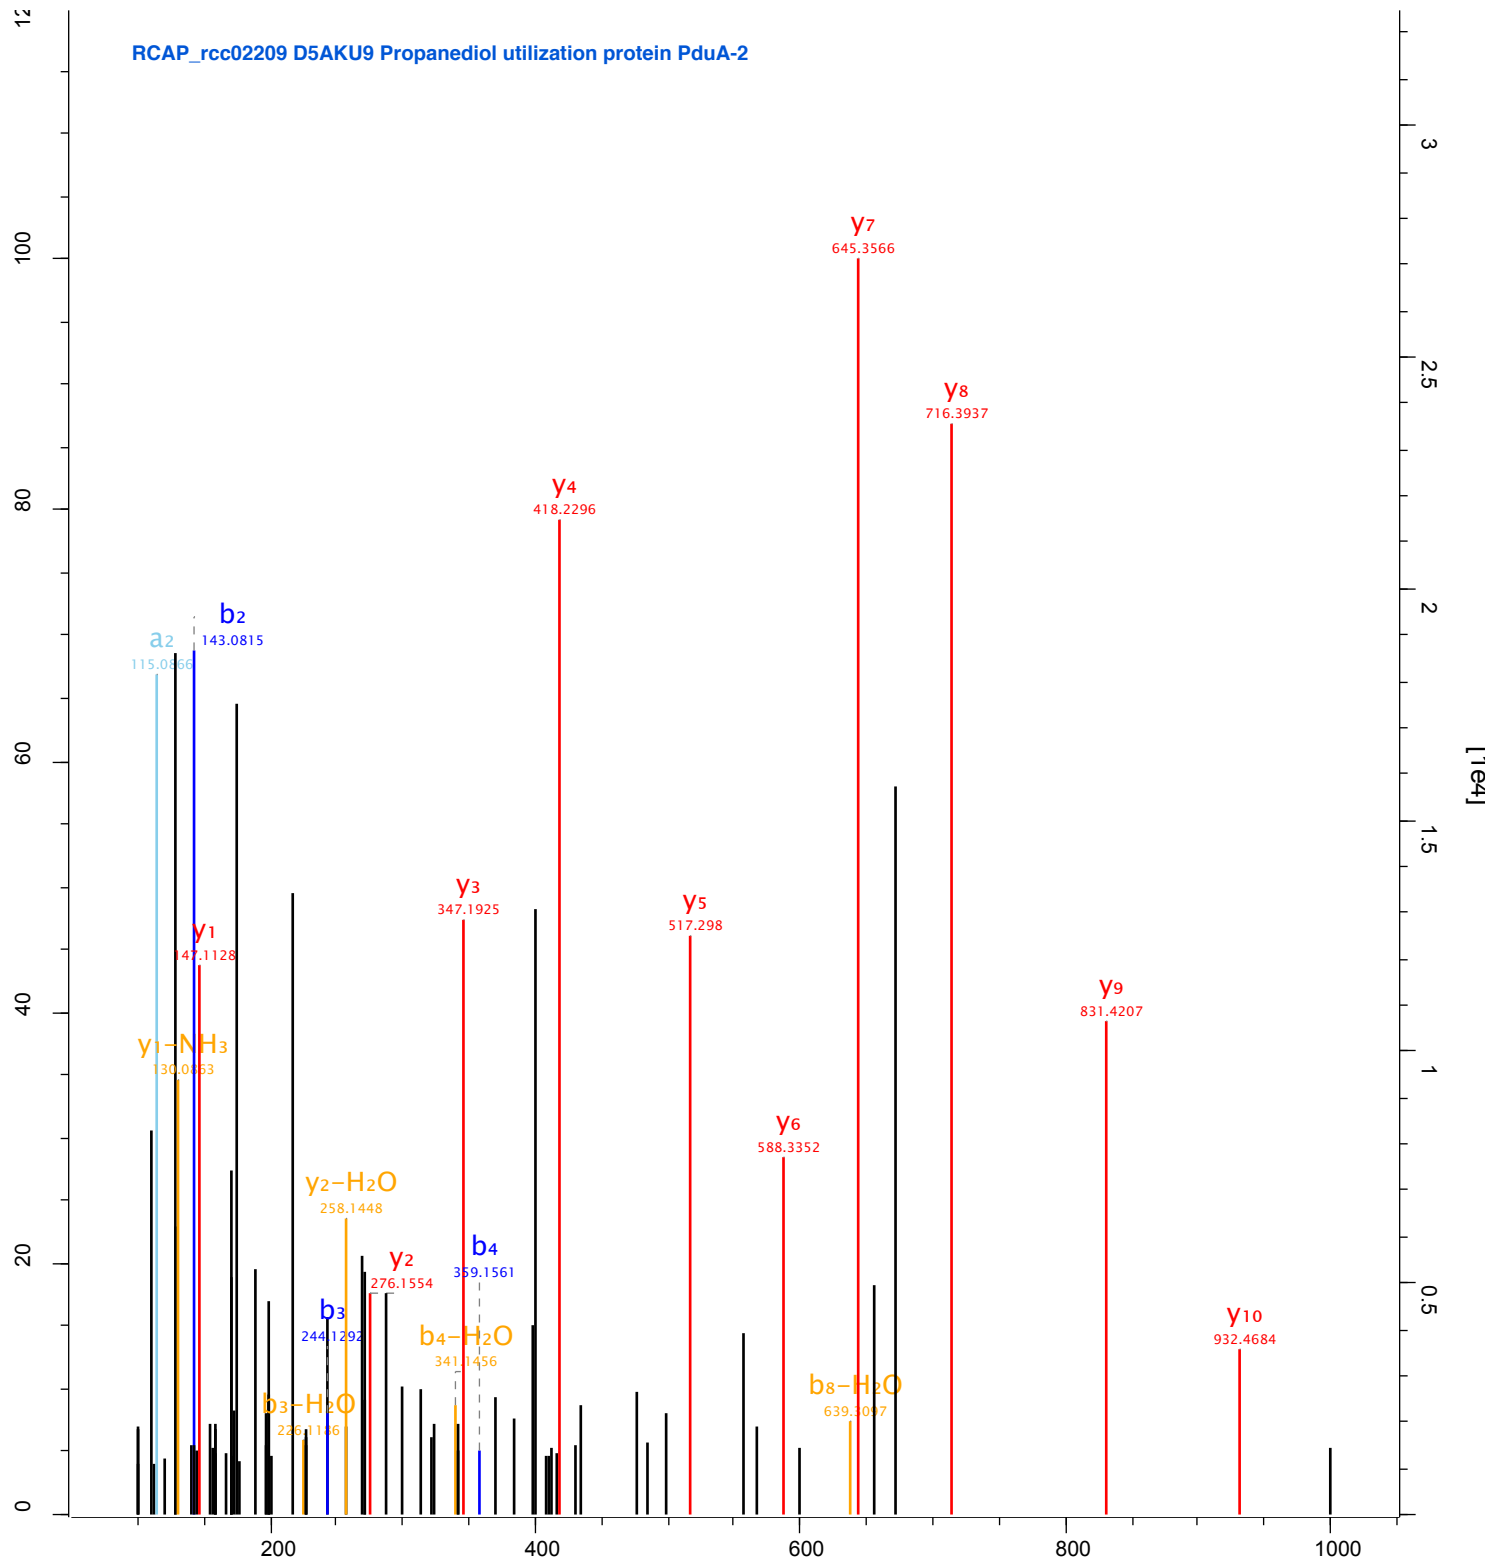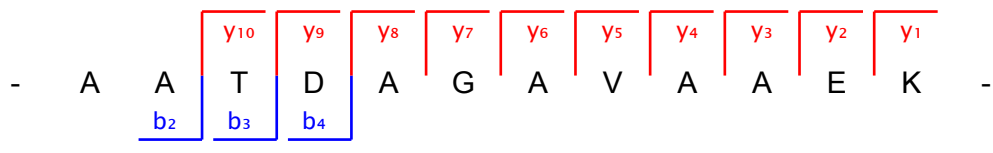

RCAP\_rcc02238 D5AKX8 Sulfoacetaldehyde acetyltransferase

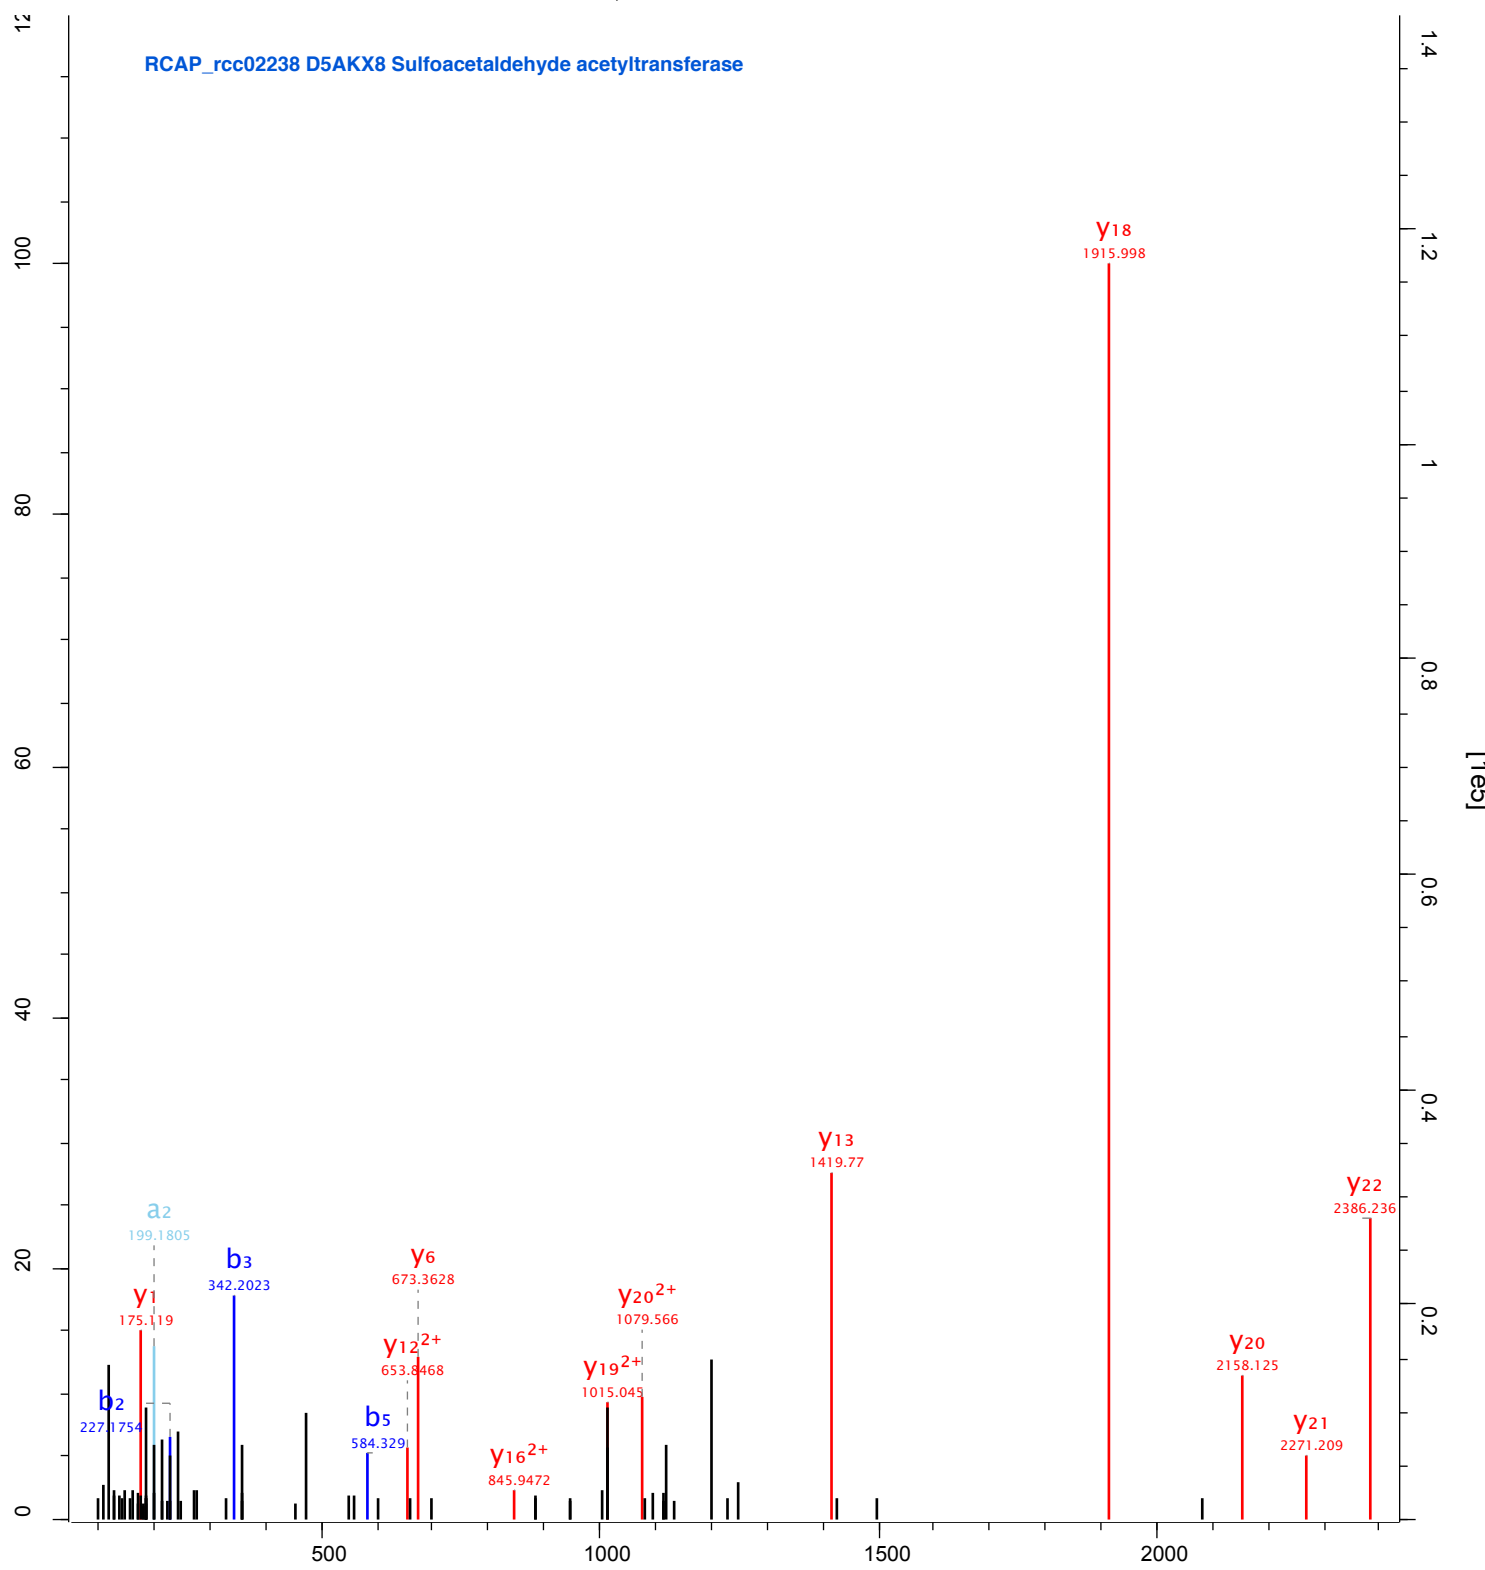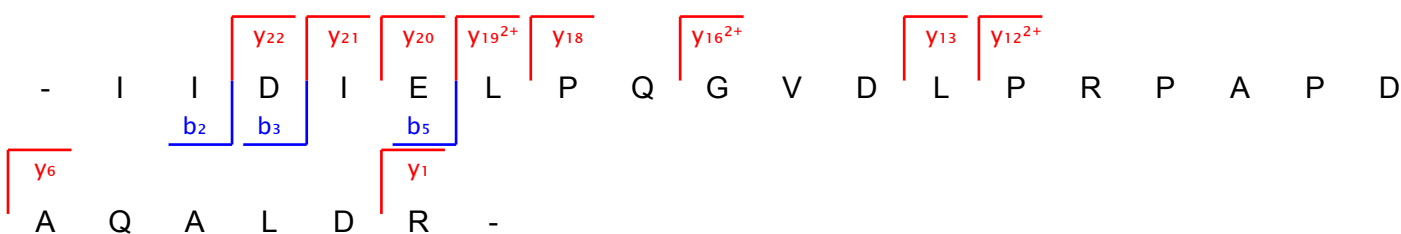

RCAP\_rcc02270 D5AL10 Transcriptional regulator, LuxR family

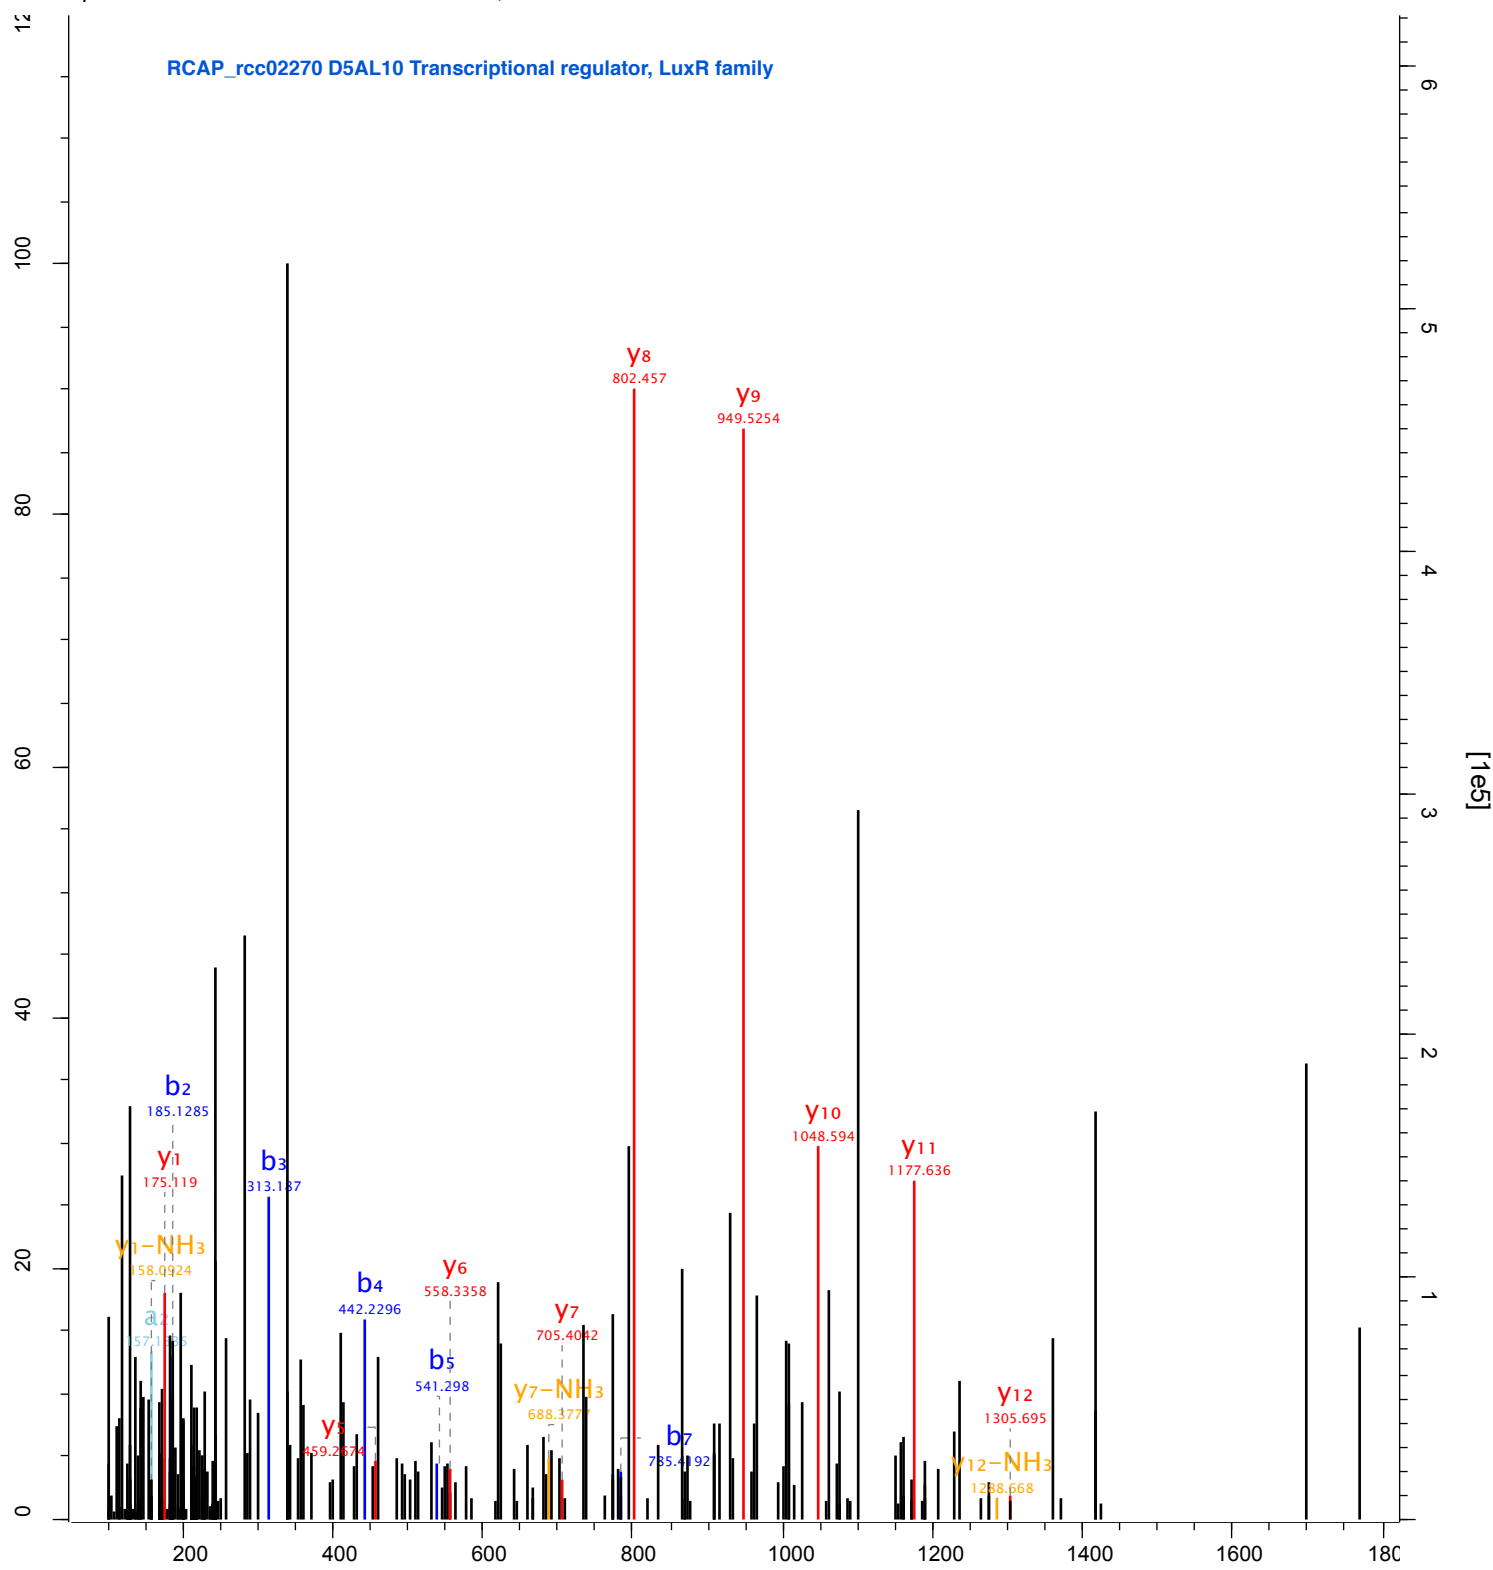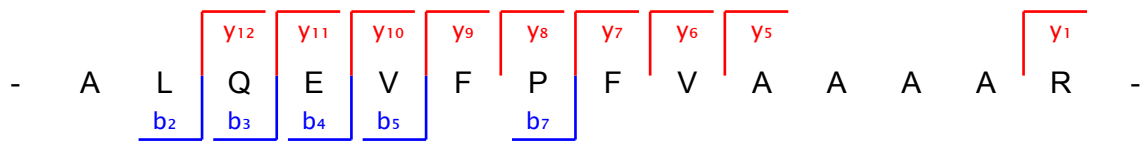

RCAP\_rcc02321 D5ALJ0 Uncharacterized protein

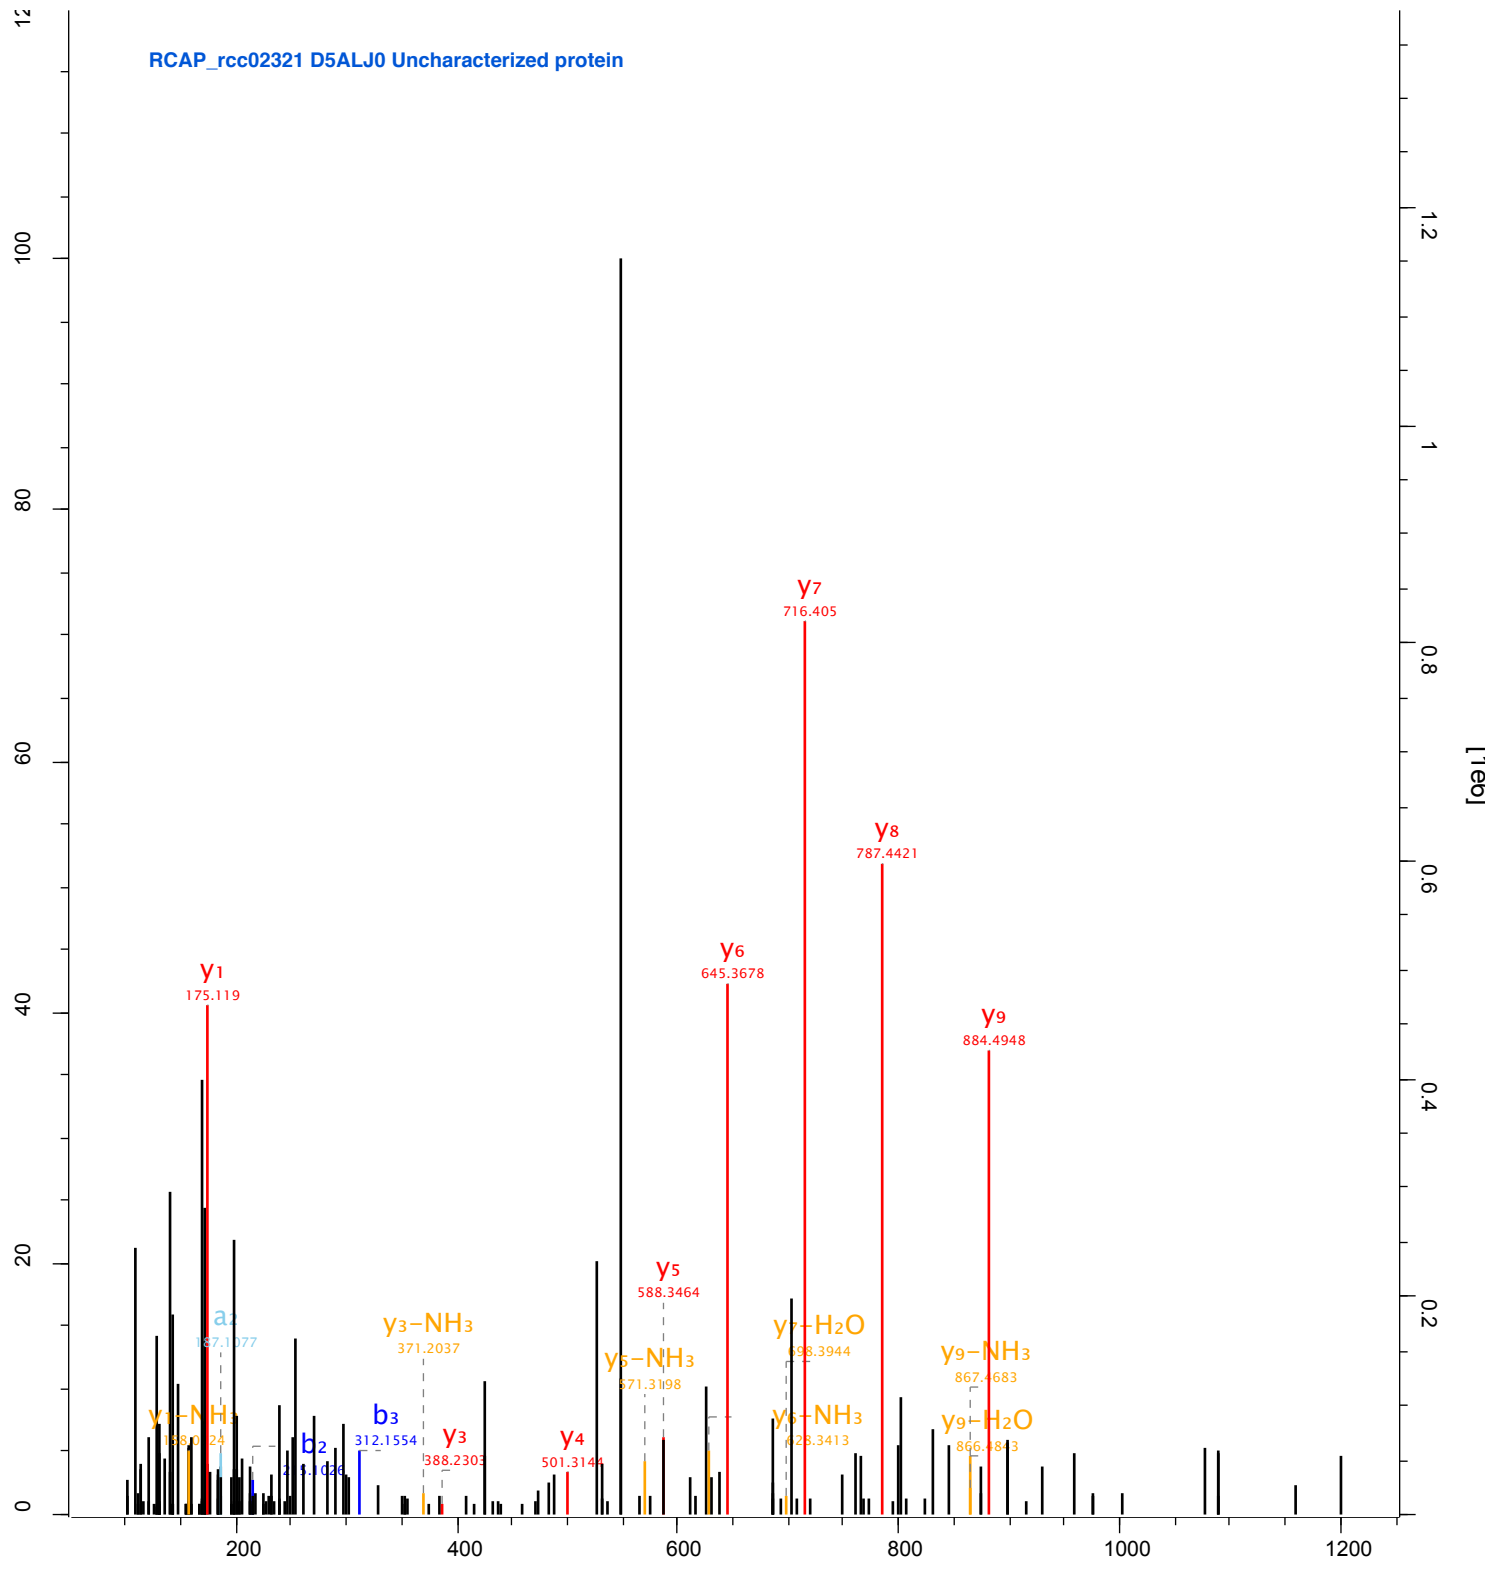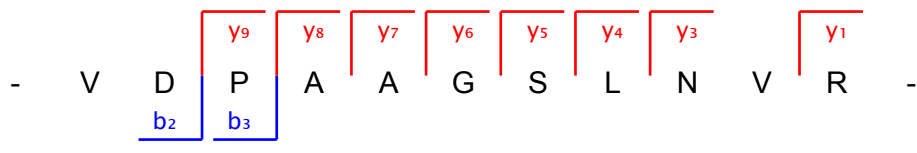



RCAP\_rcc02344 D5ALL3 Uncharacterized protein

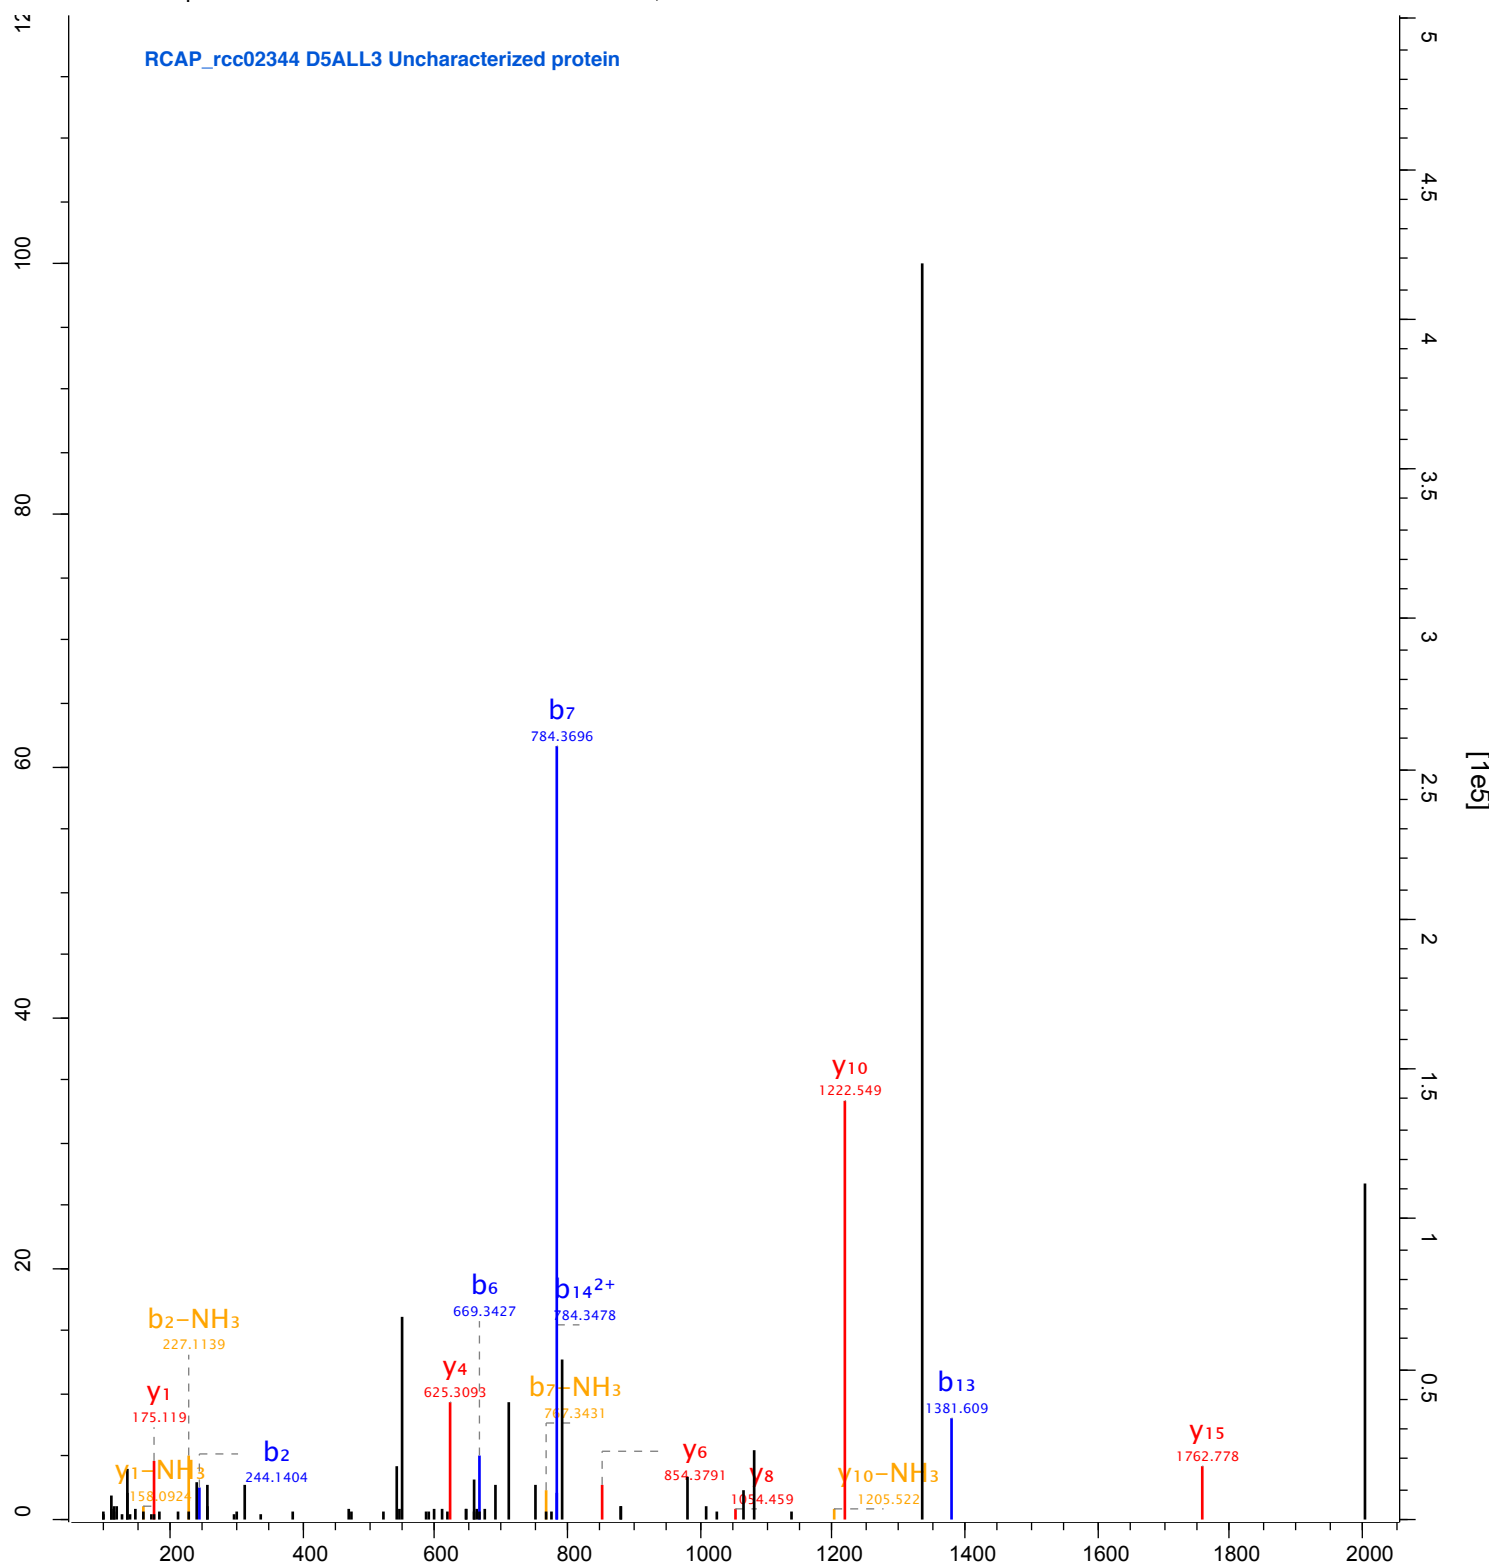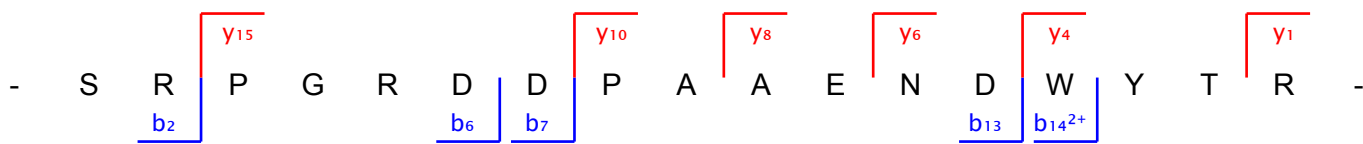

RCAP\_rcc02403 D5ALS2 Peptidoglycan-binding domain 1 protein

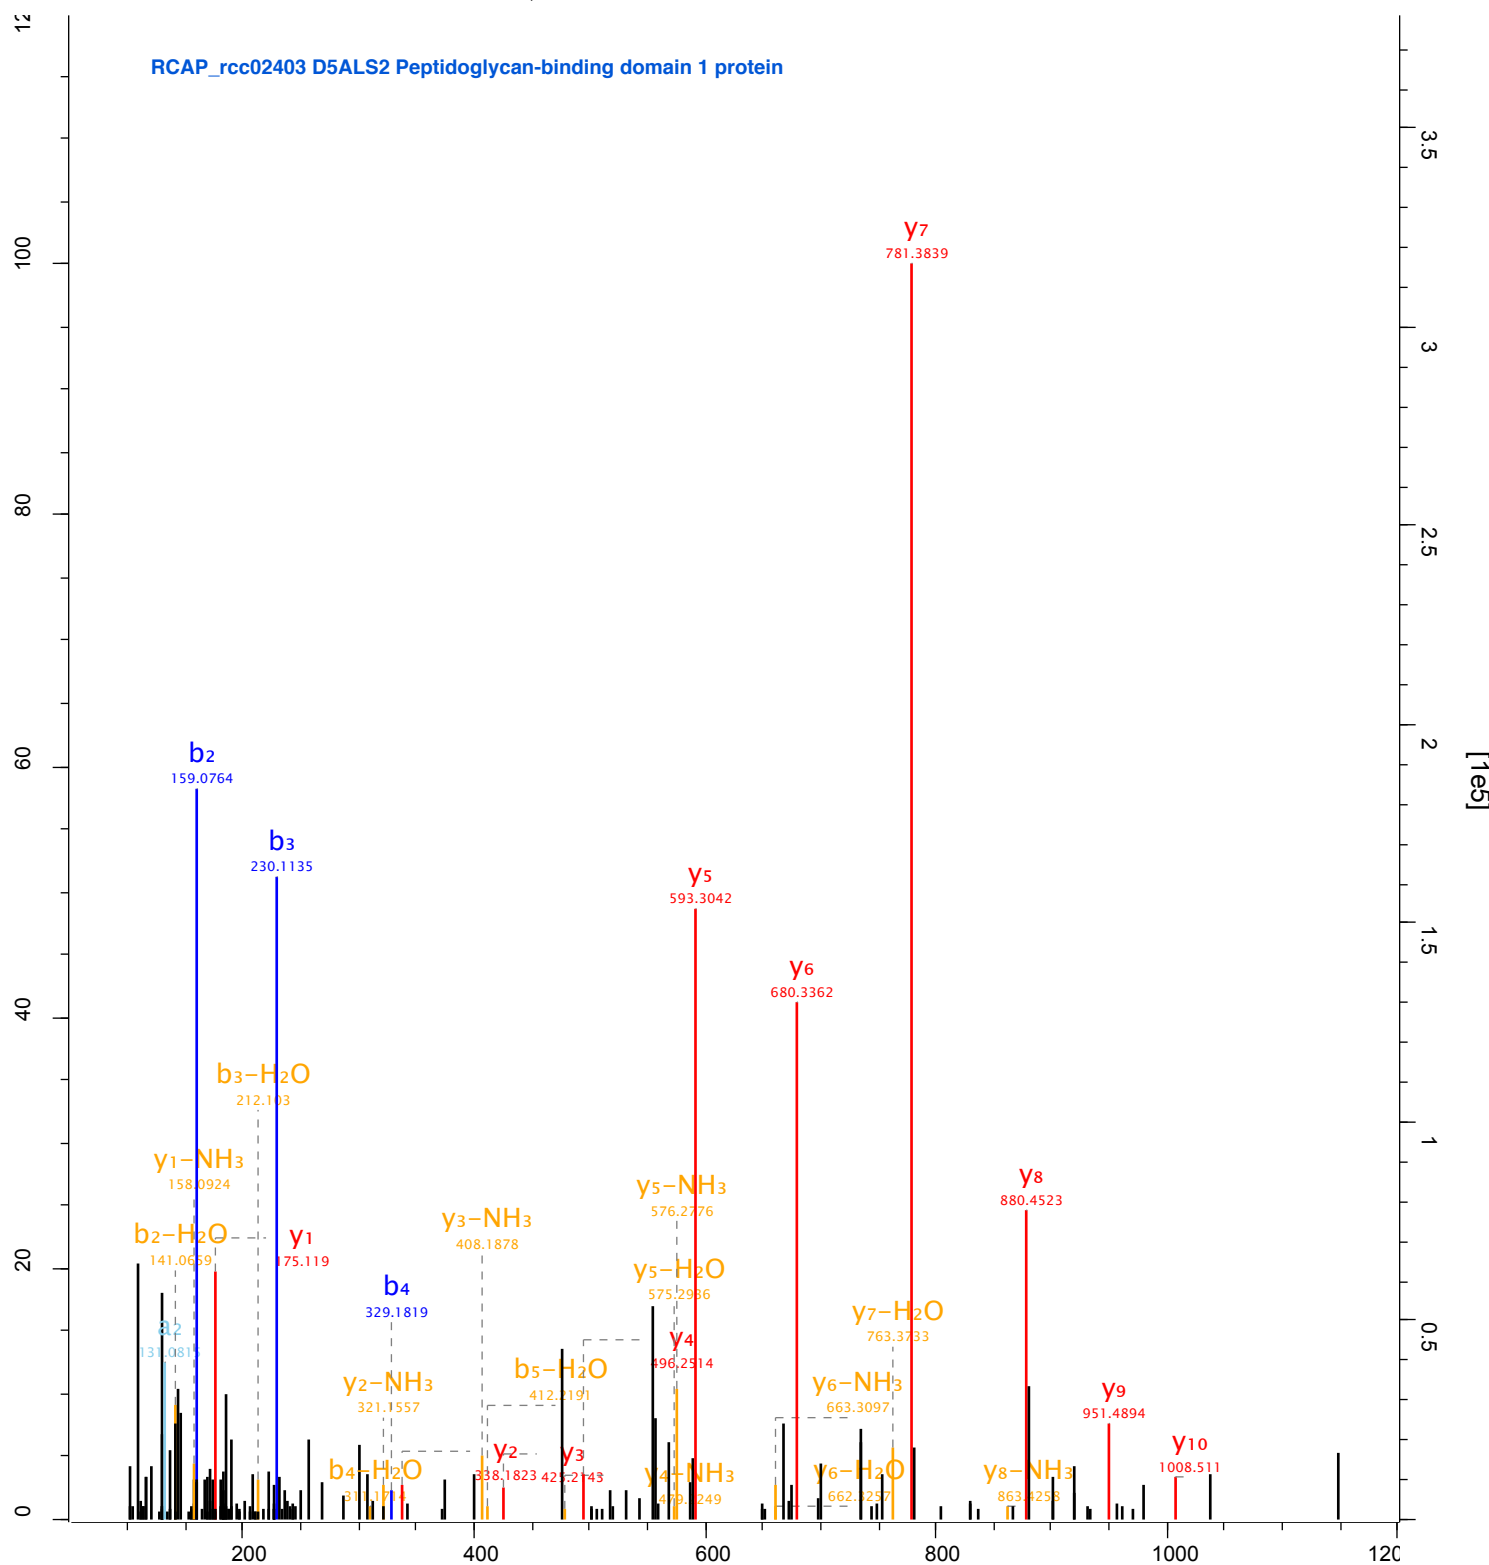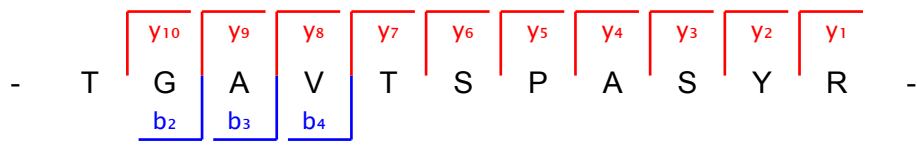

RCAP\_rcc02415 D5ALT4 Uncharacterized protein

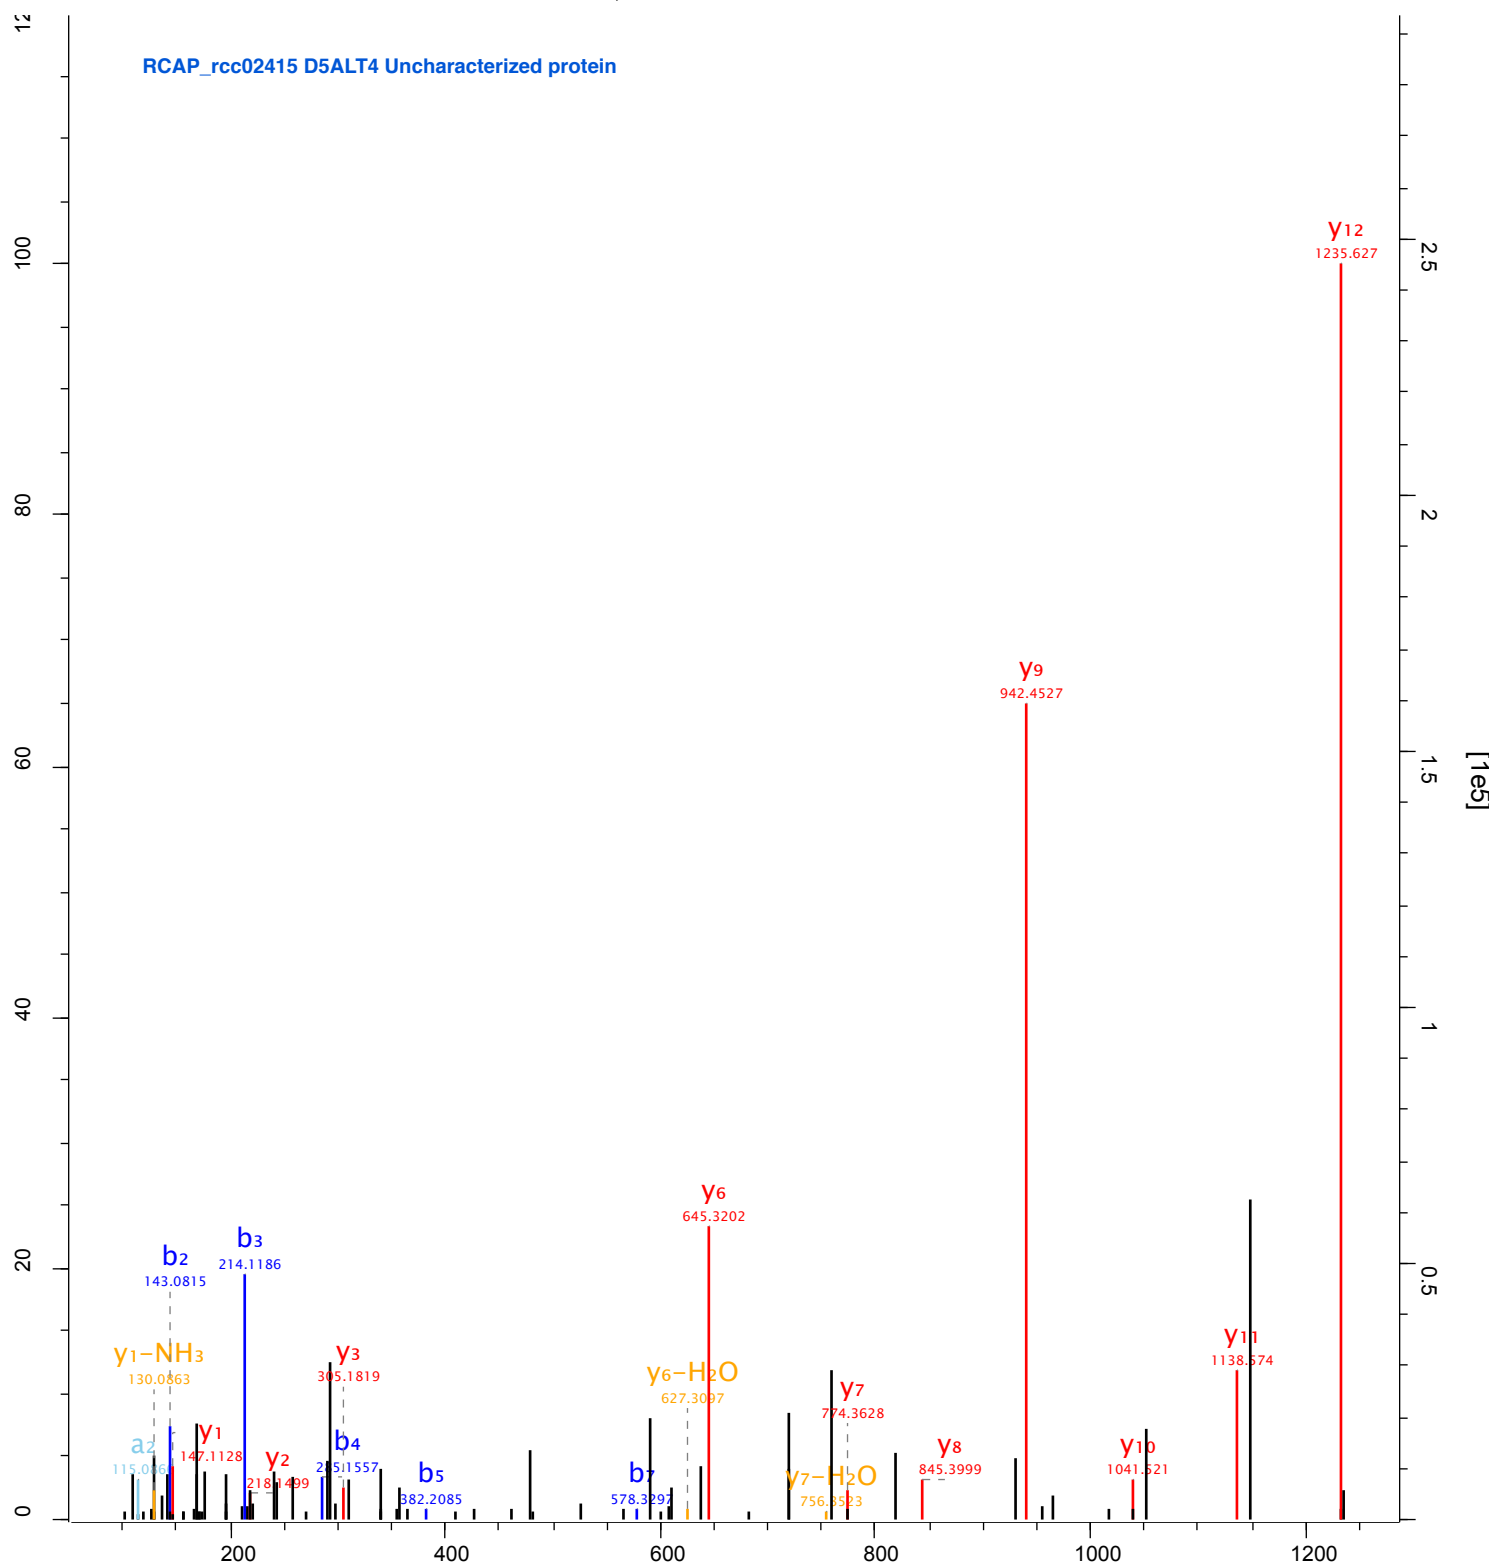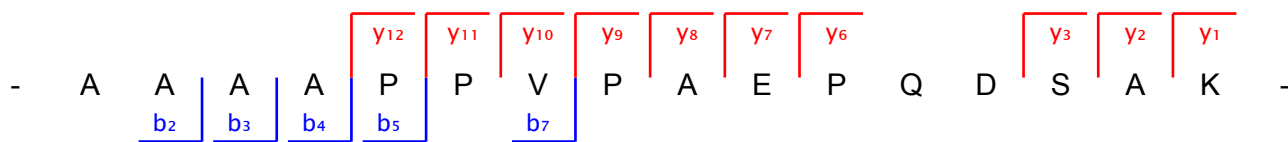

RCAP\_rcc02439 D5ALV8 Uncharacterized protein

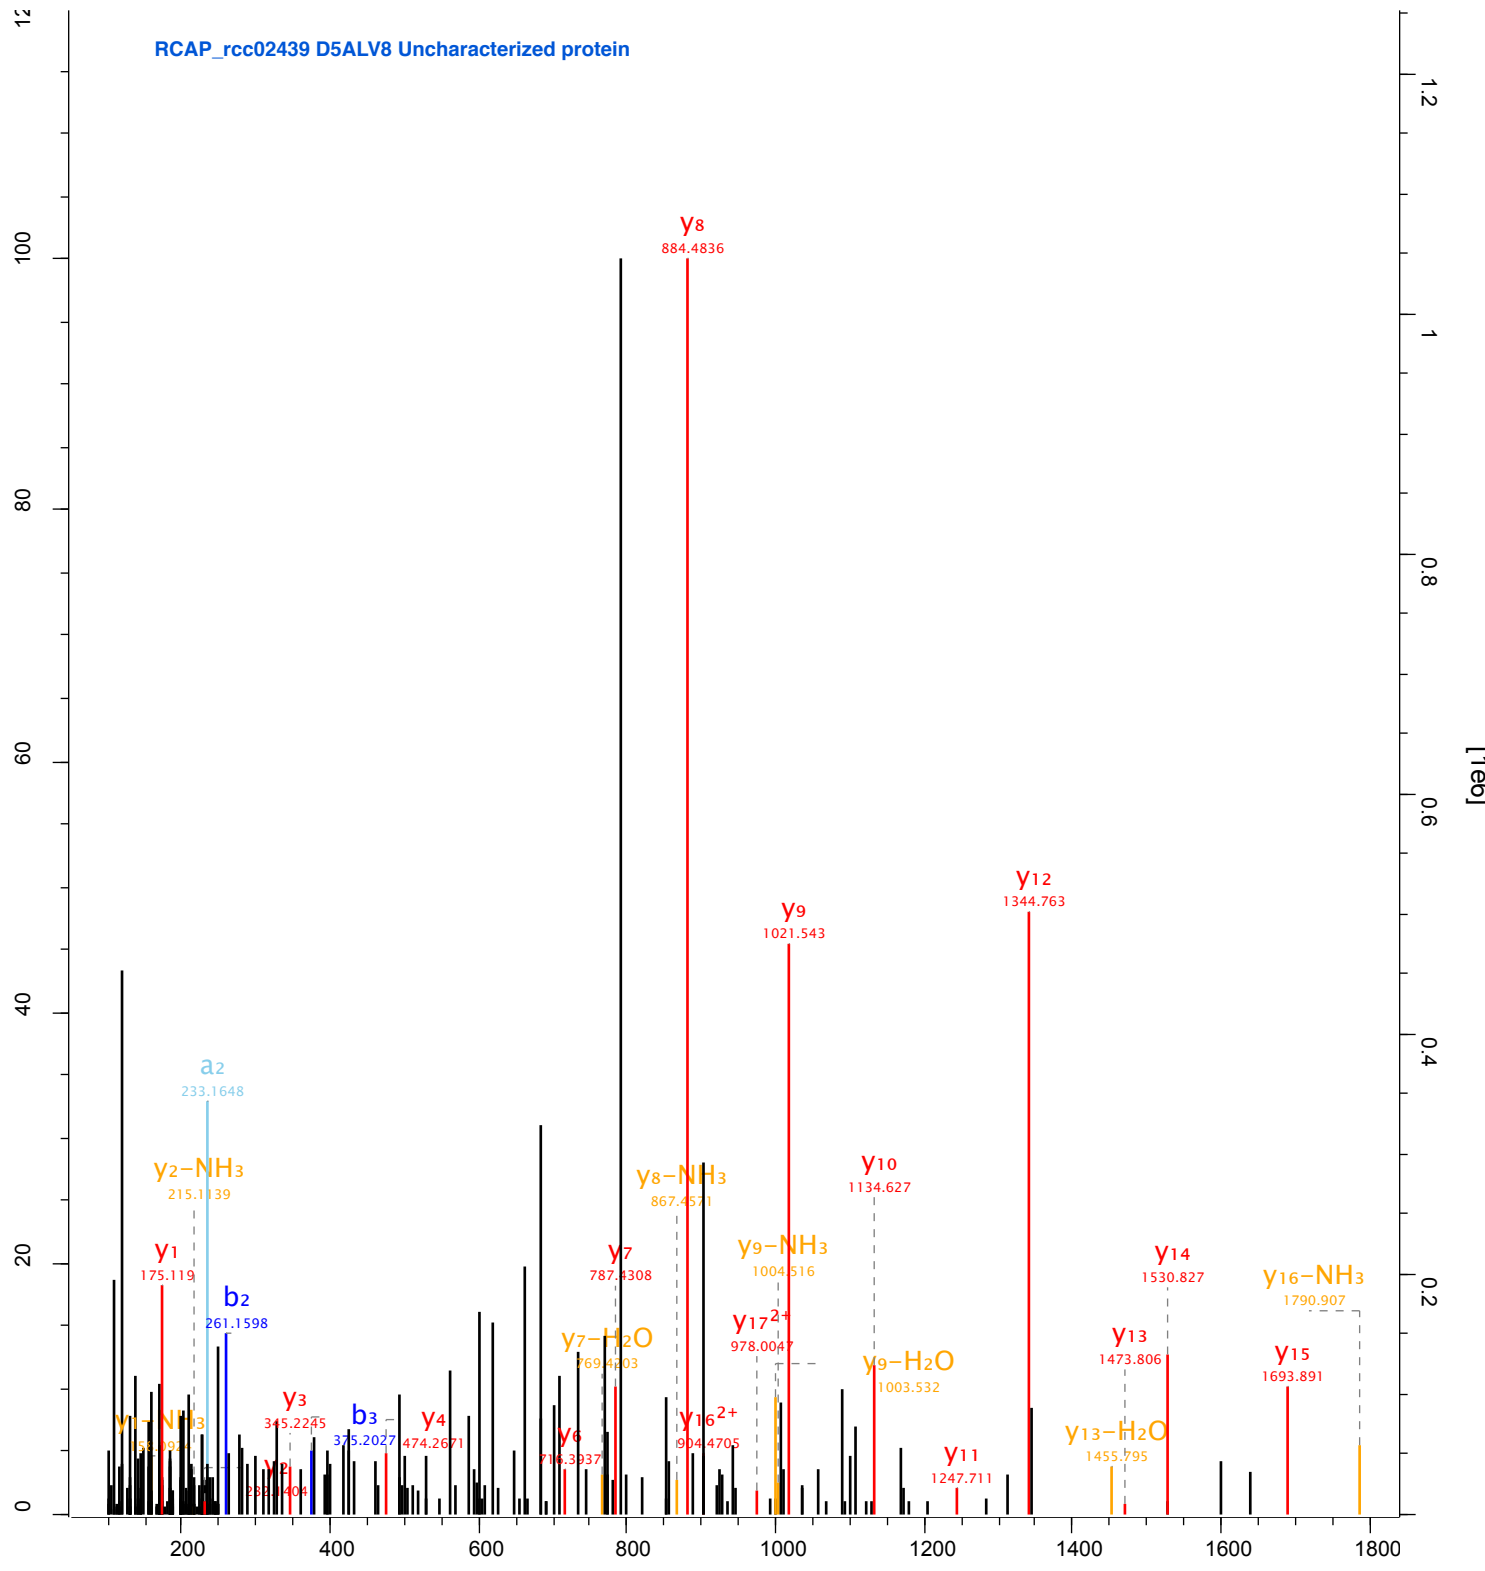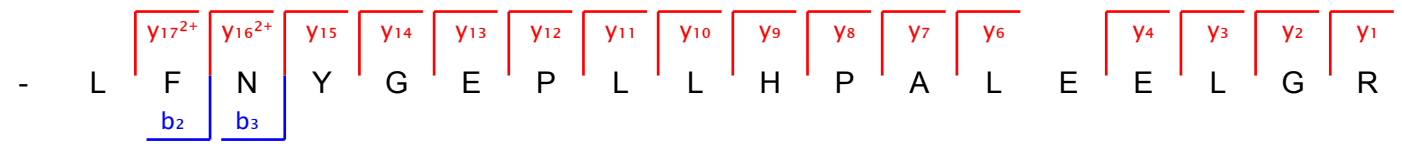

RCAP\_rcc02462 D5AMB6 Membrane protein, putative

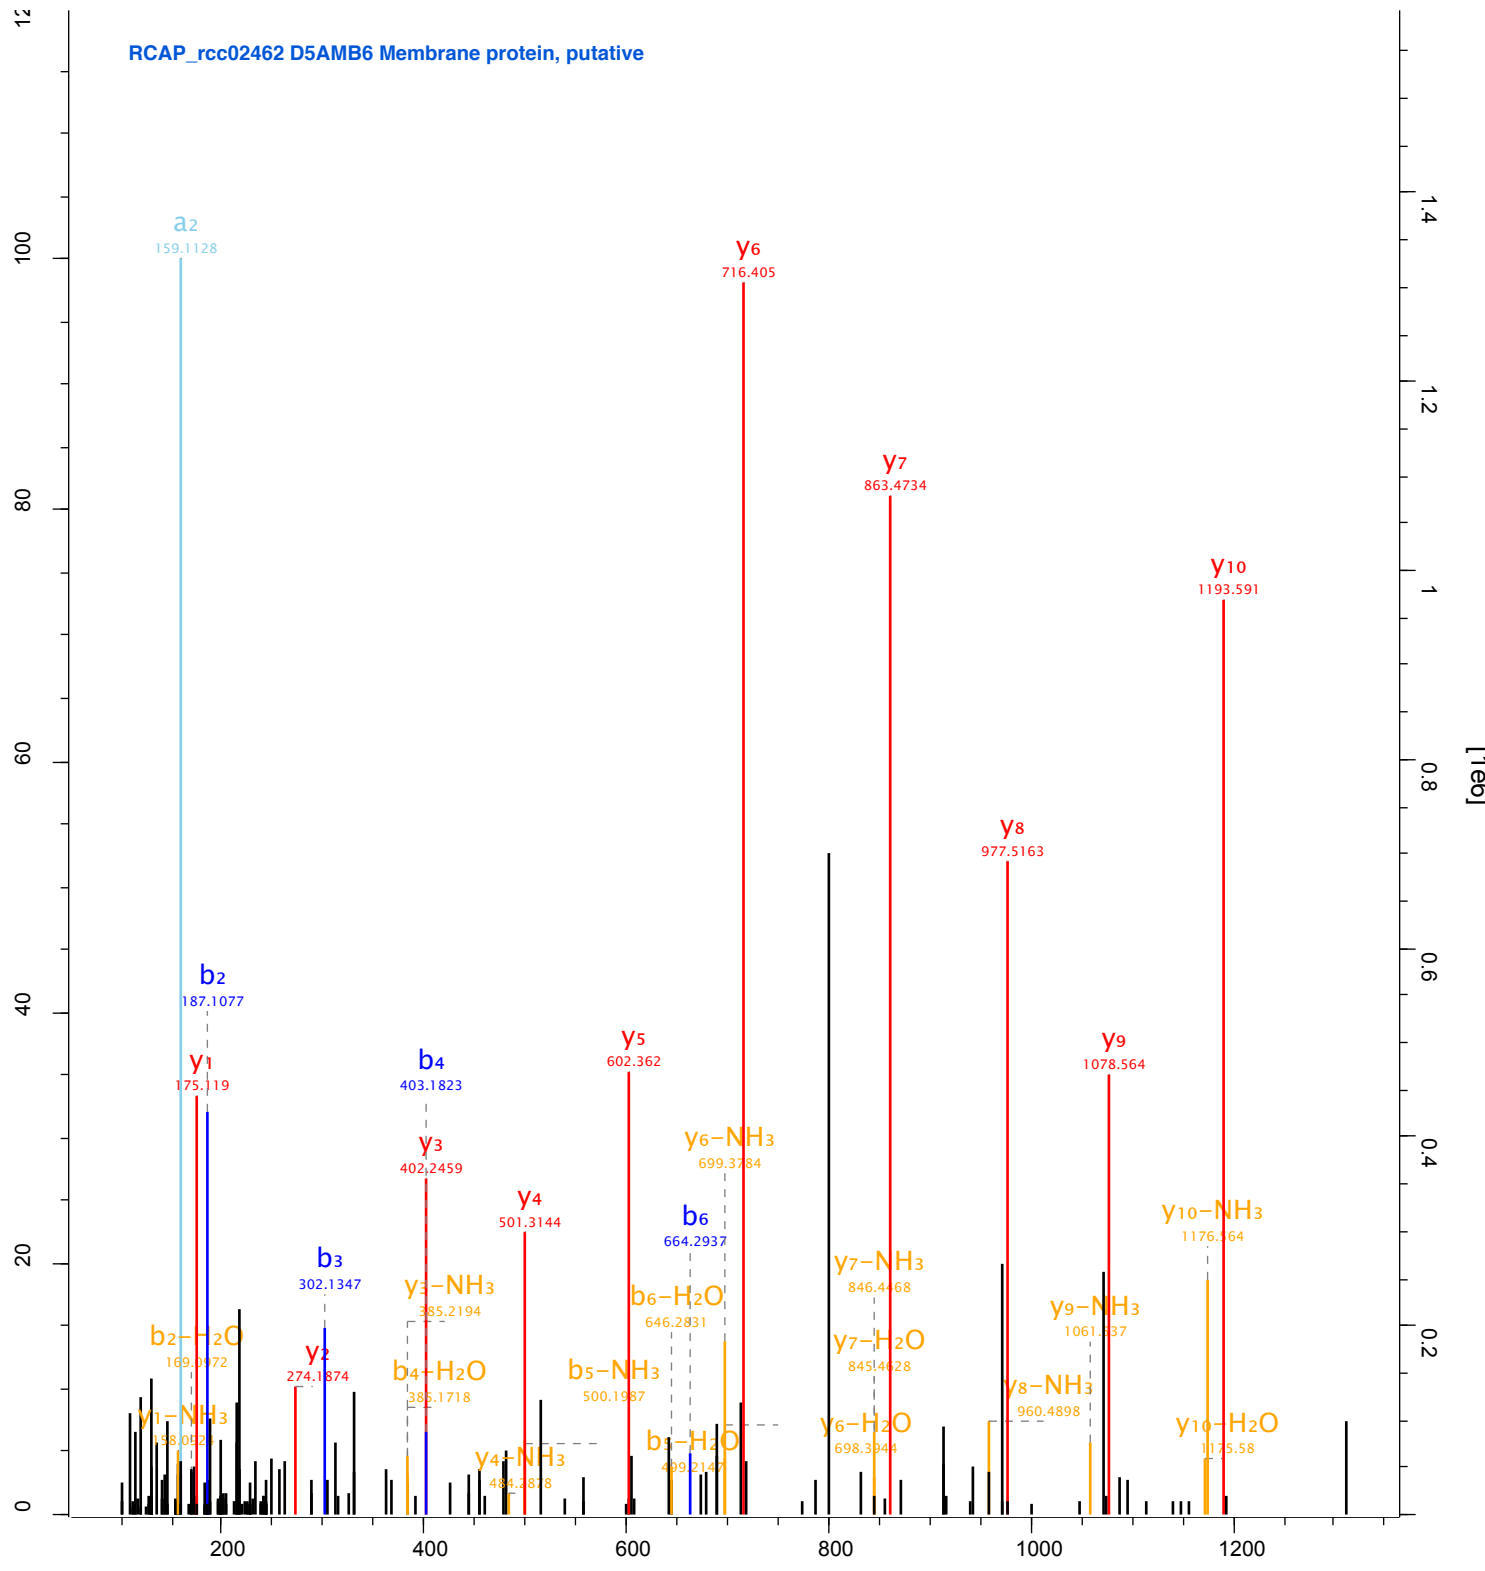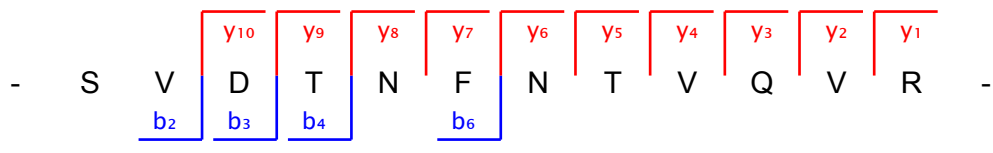

RCAP\_rcc02485 D5AMD9 Methyltransferase, type 12 family

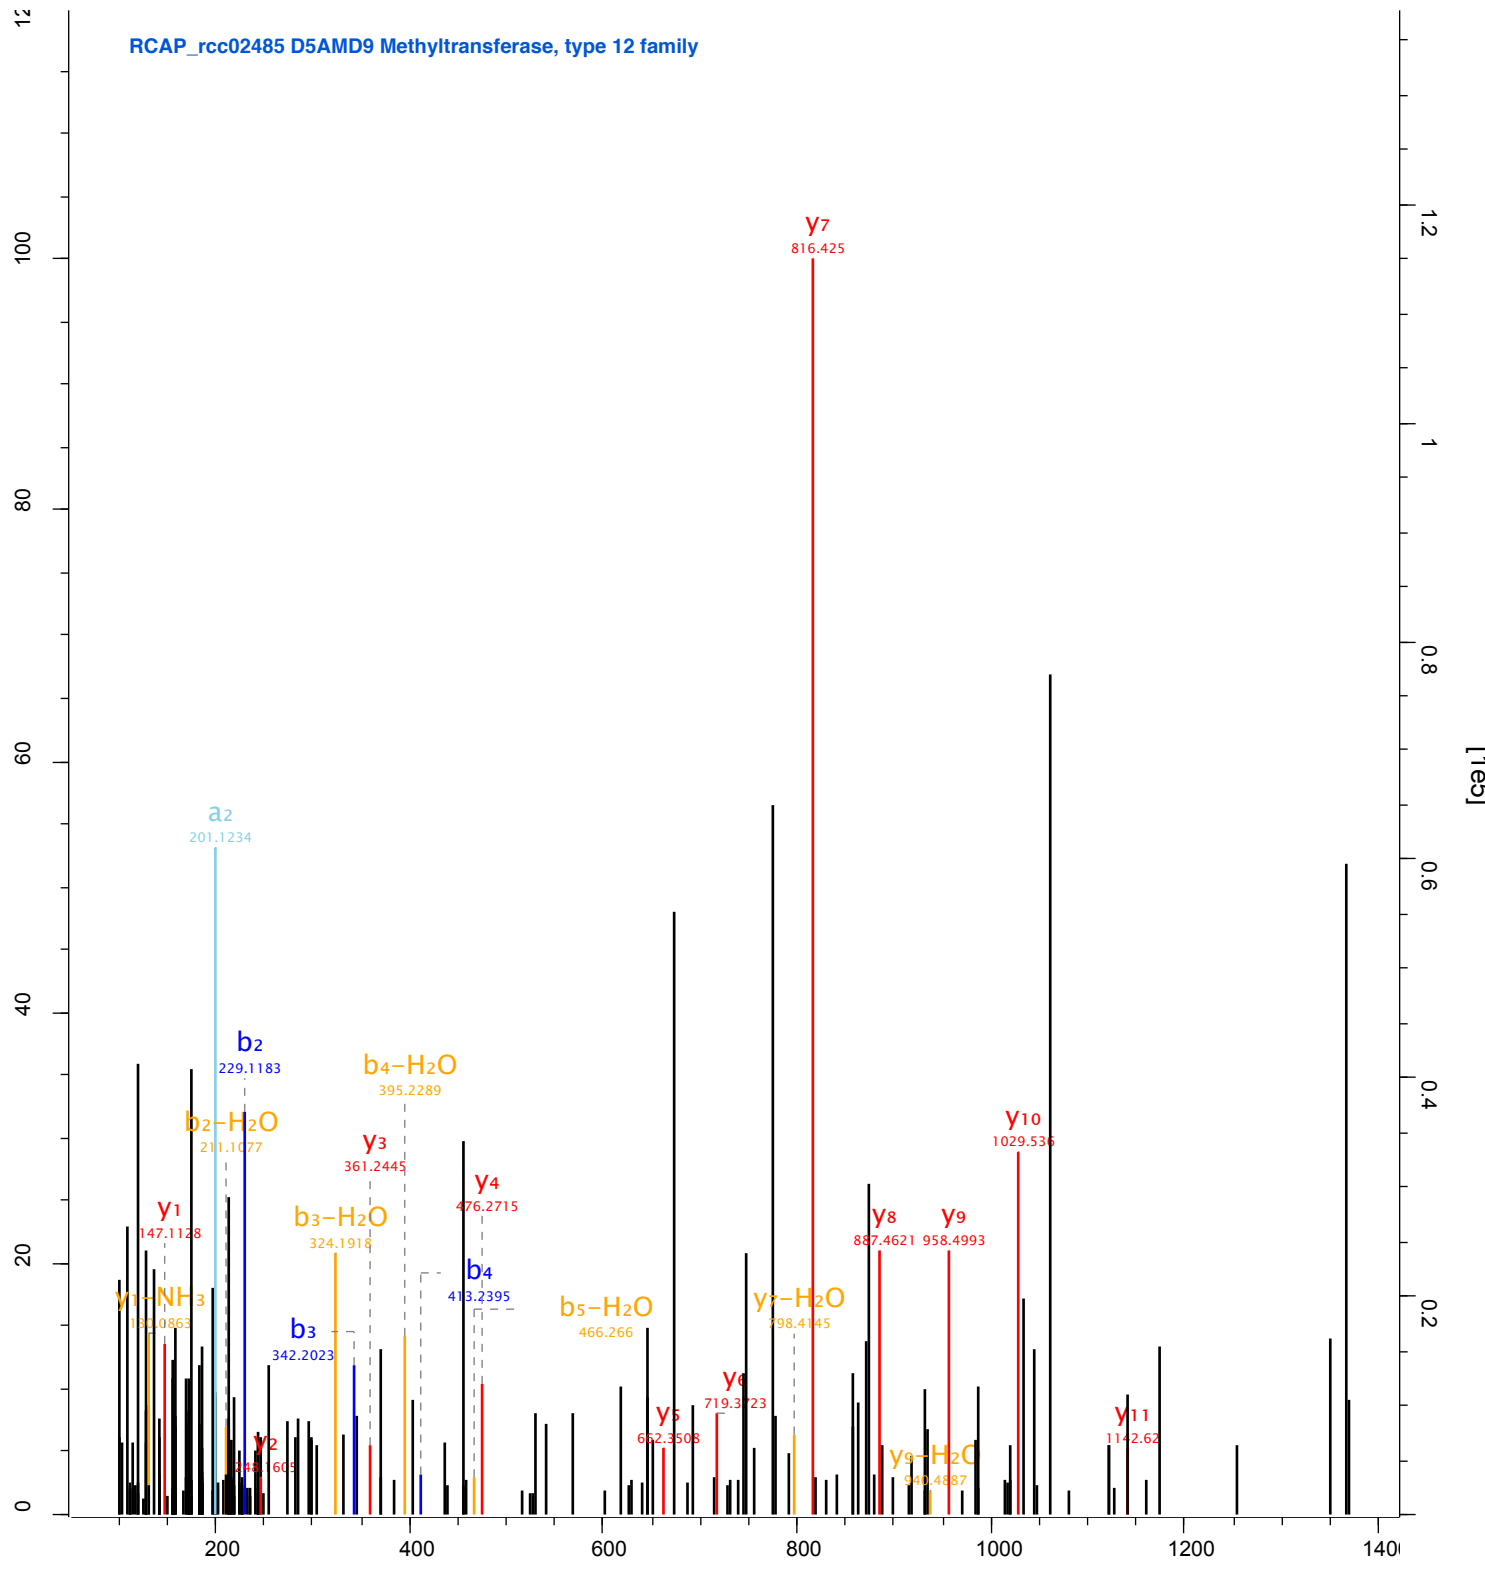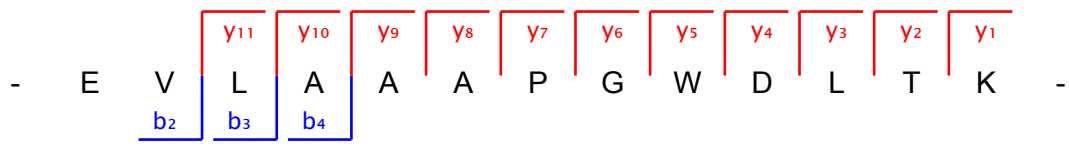

NCAP\_10002352 D3AM10  
 Protein PlusC\_2

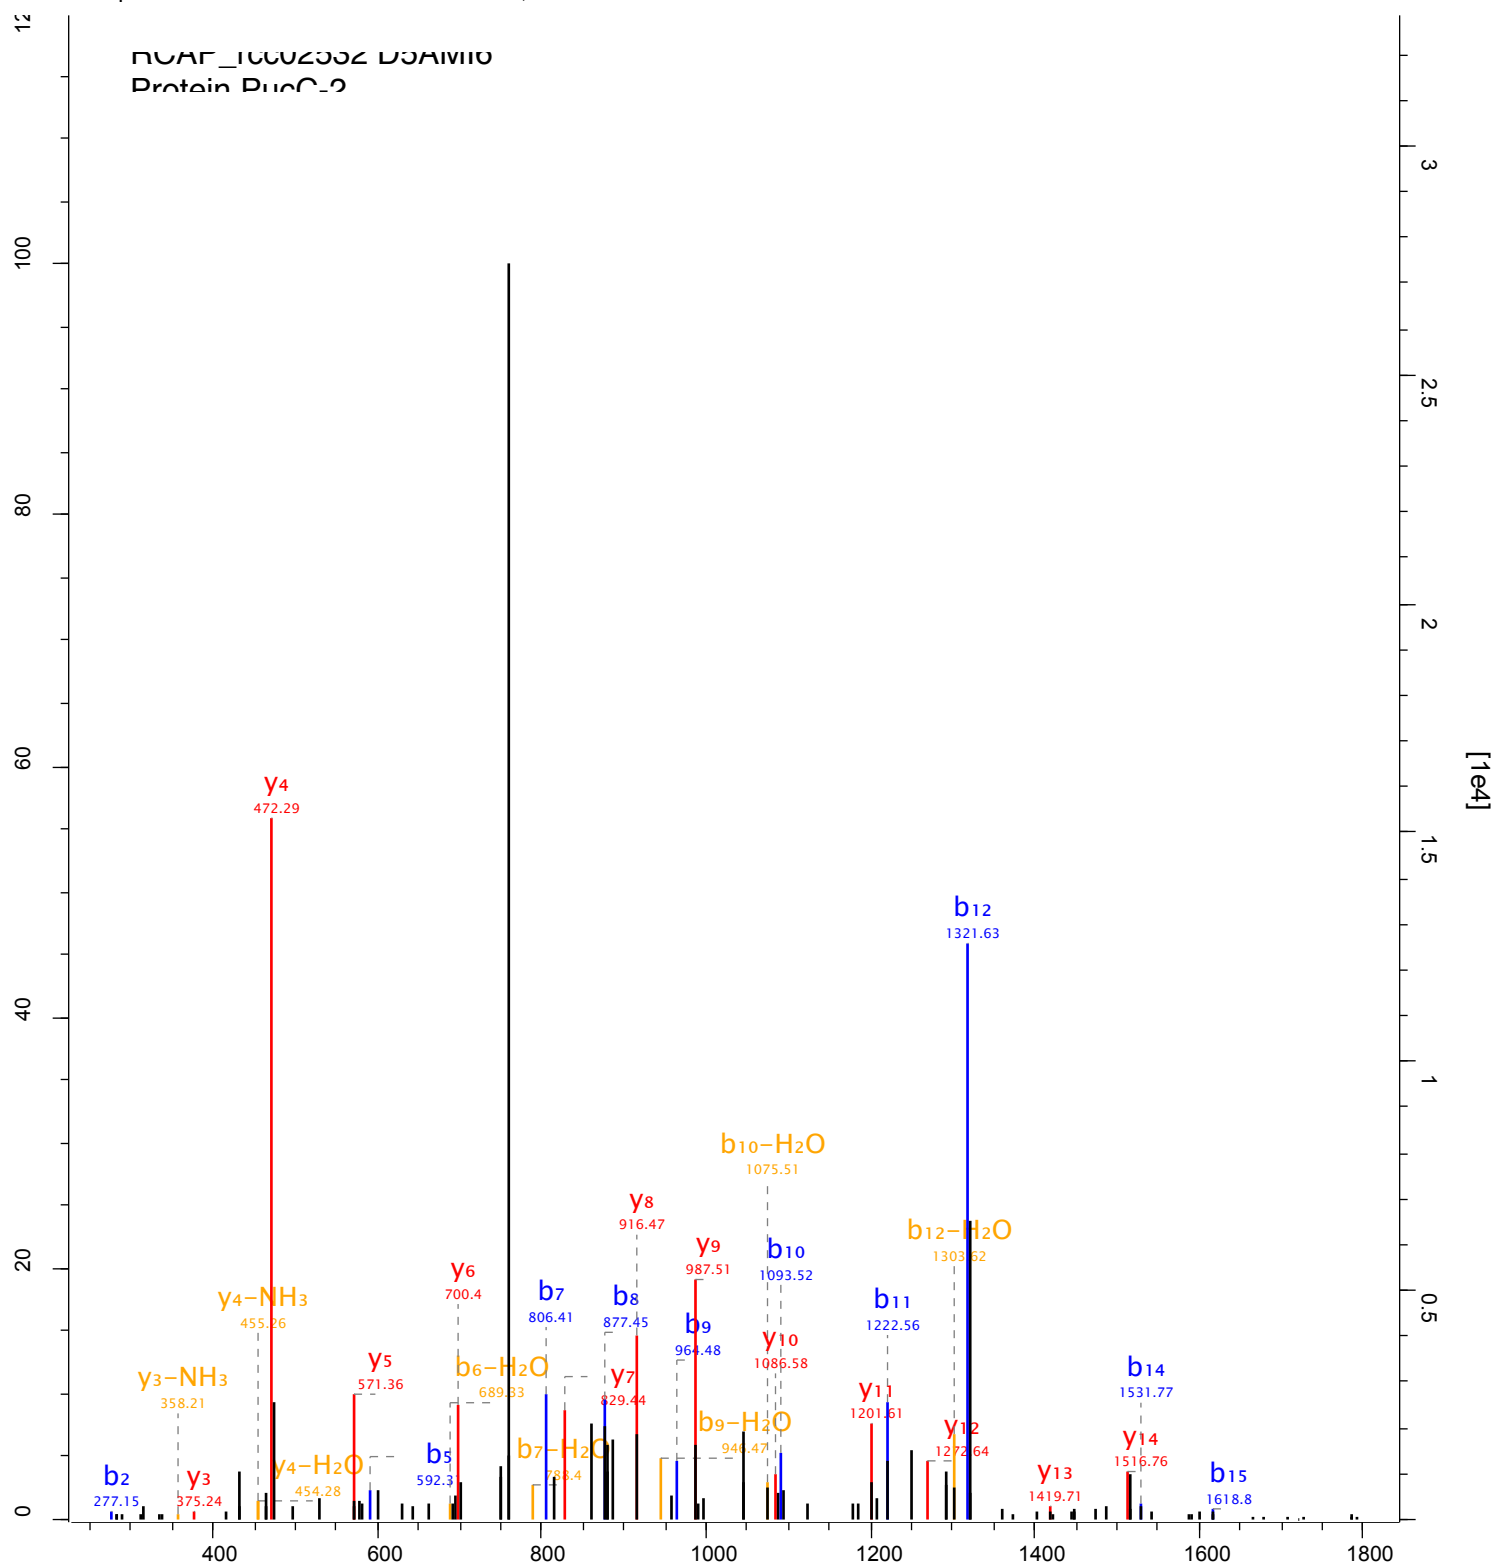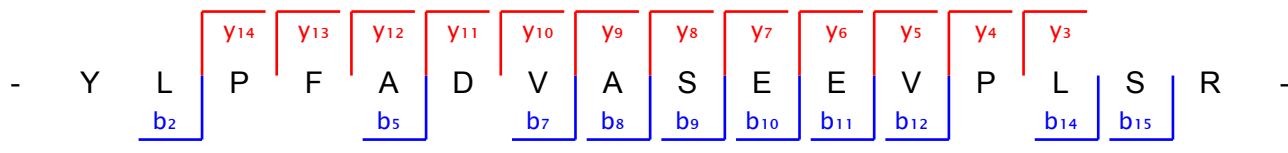

RCAP\_rcc02593 D5AN33 Uncharacterized protein

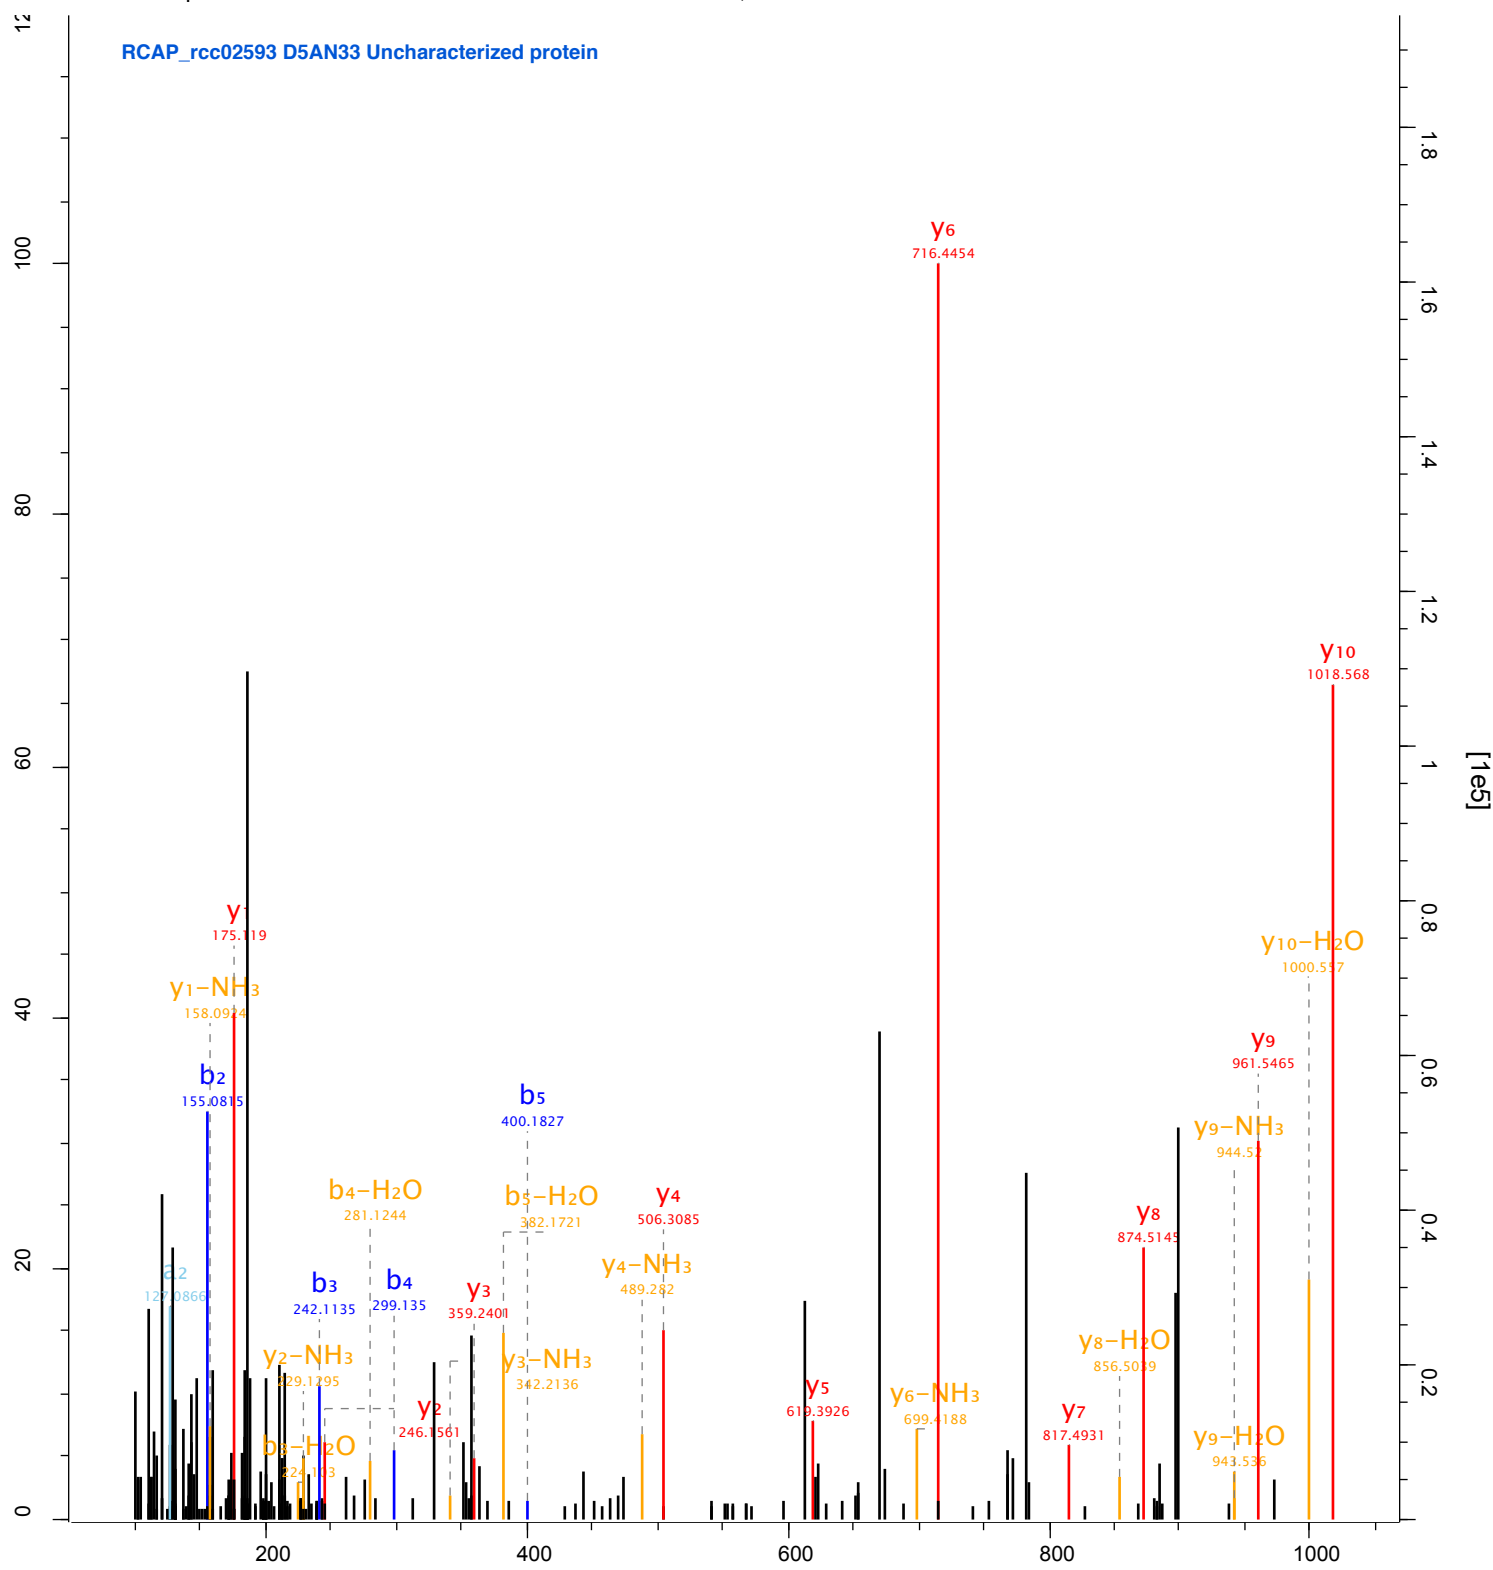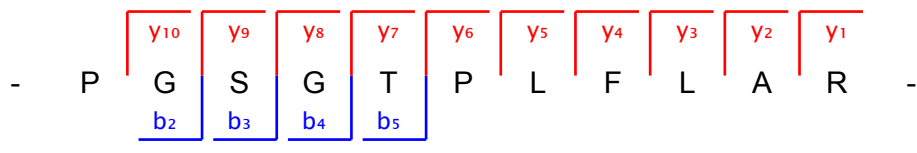



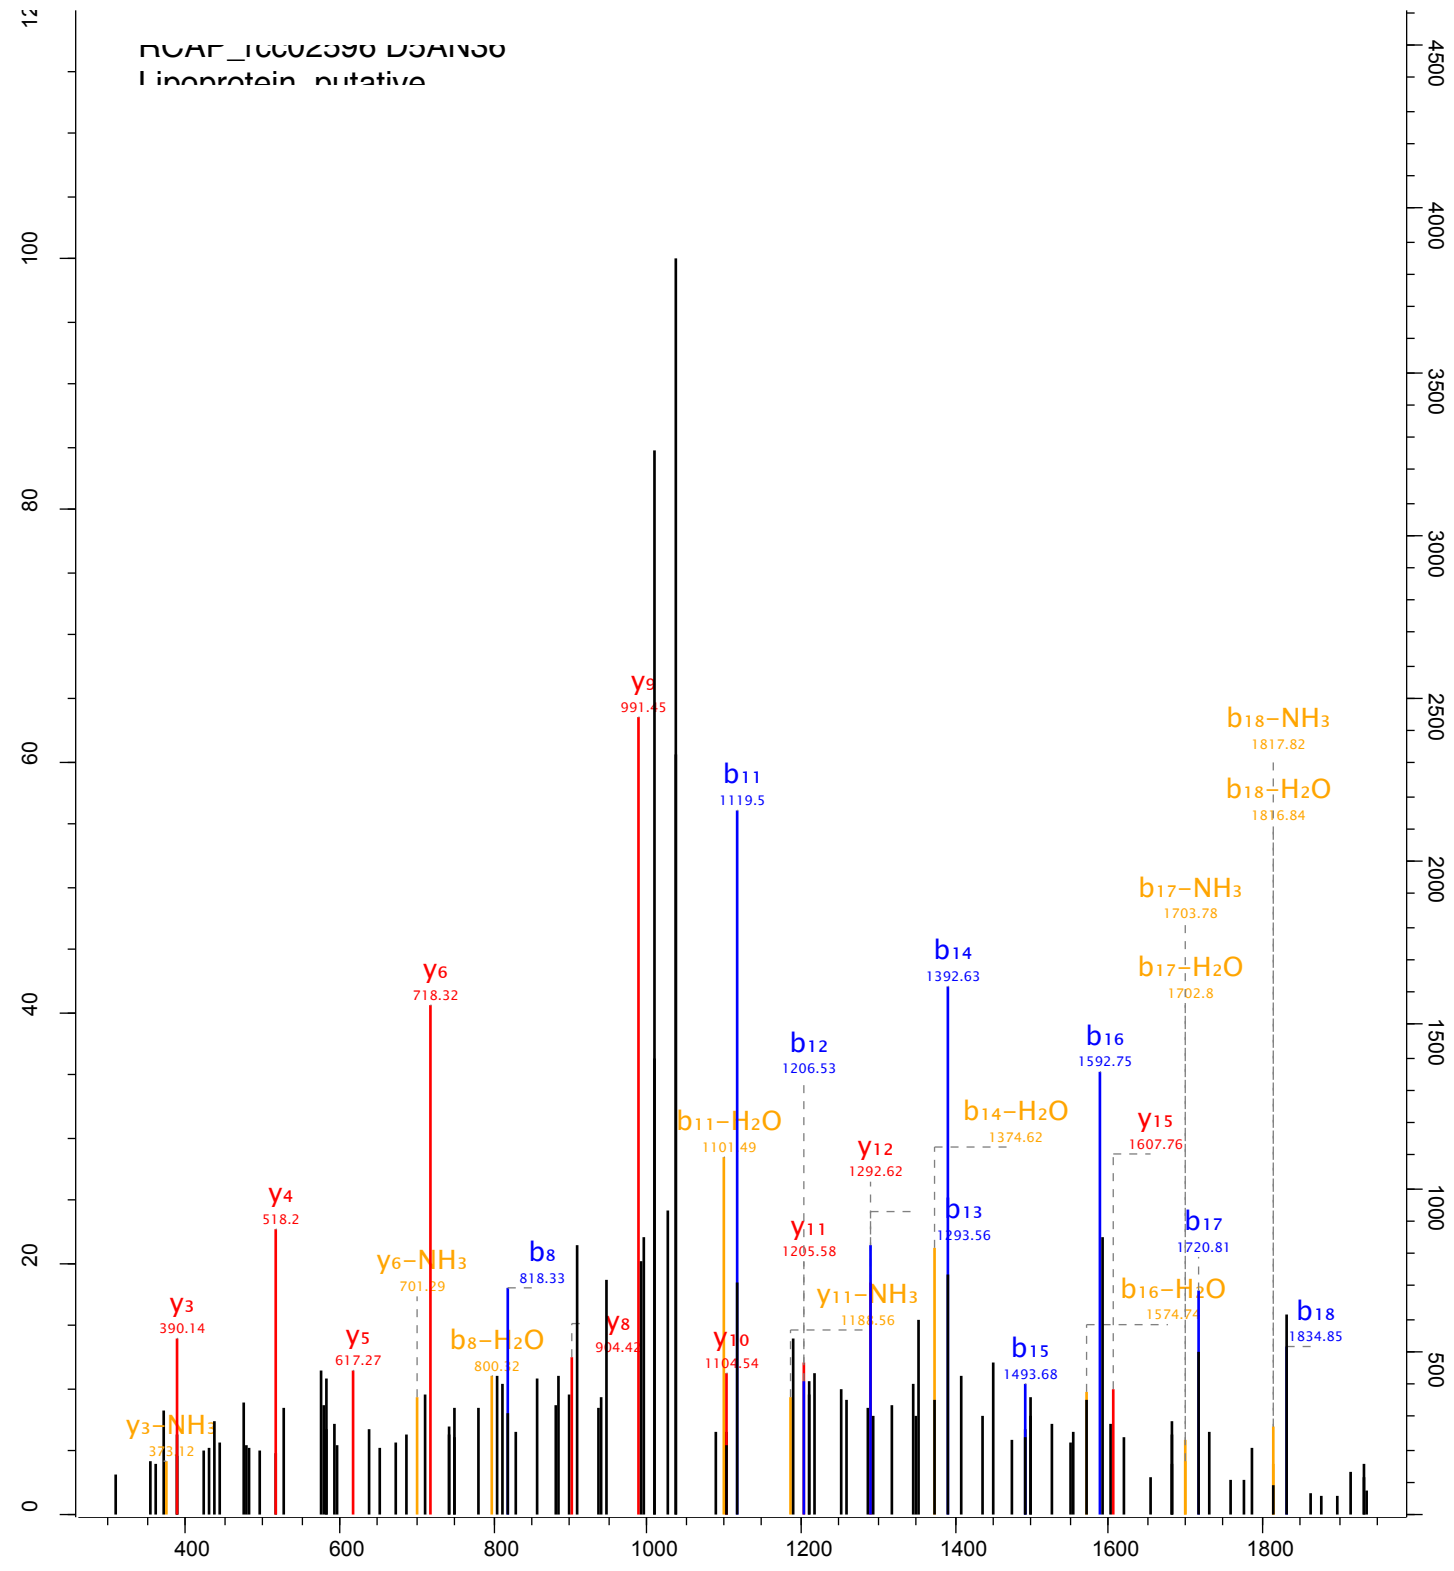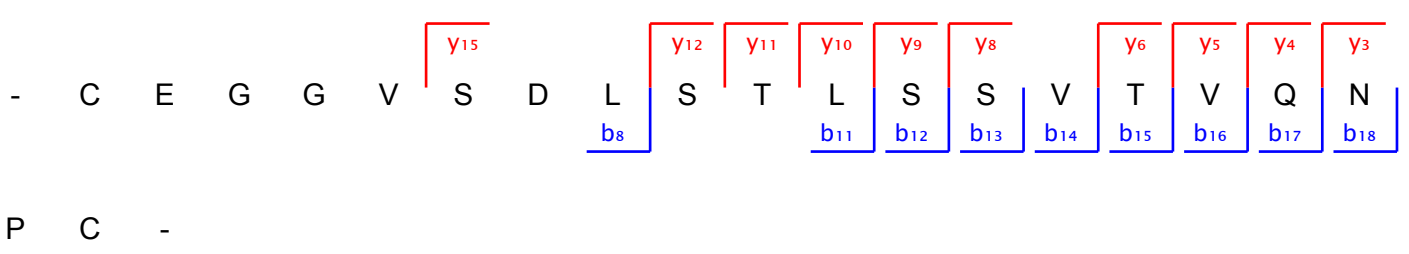

RCAP\_rcc02618 D5AN58 Uncharacterized protein

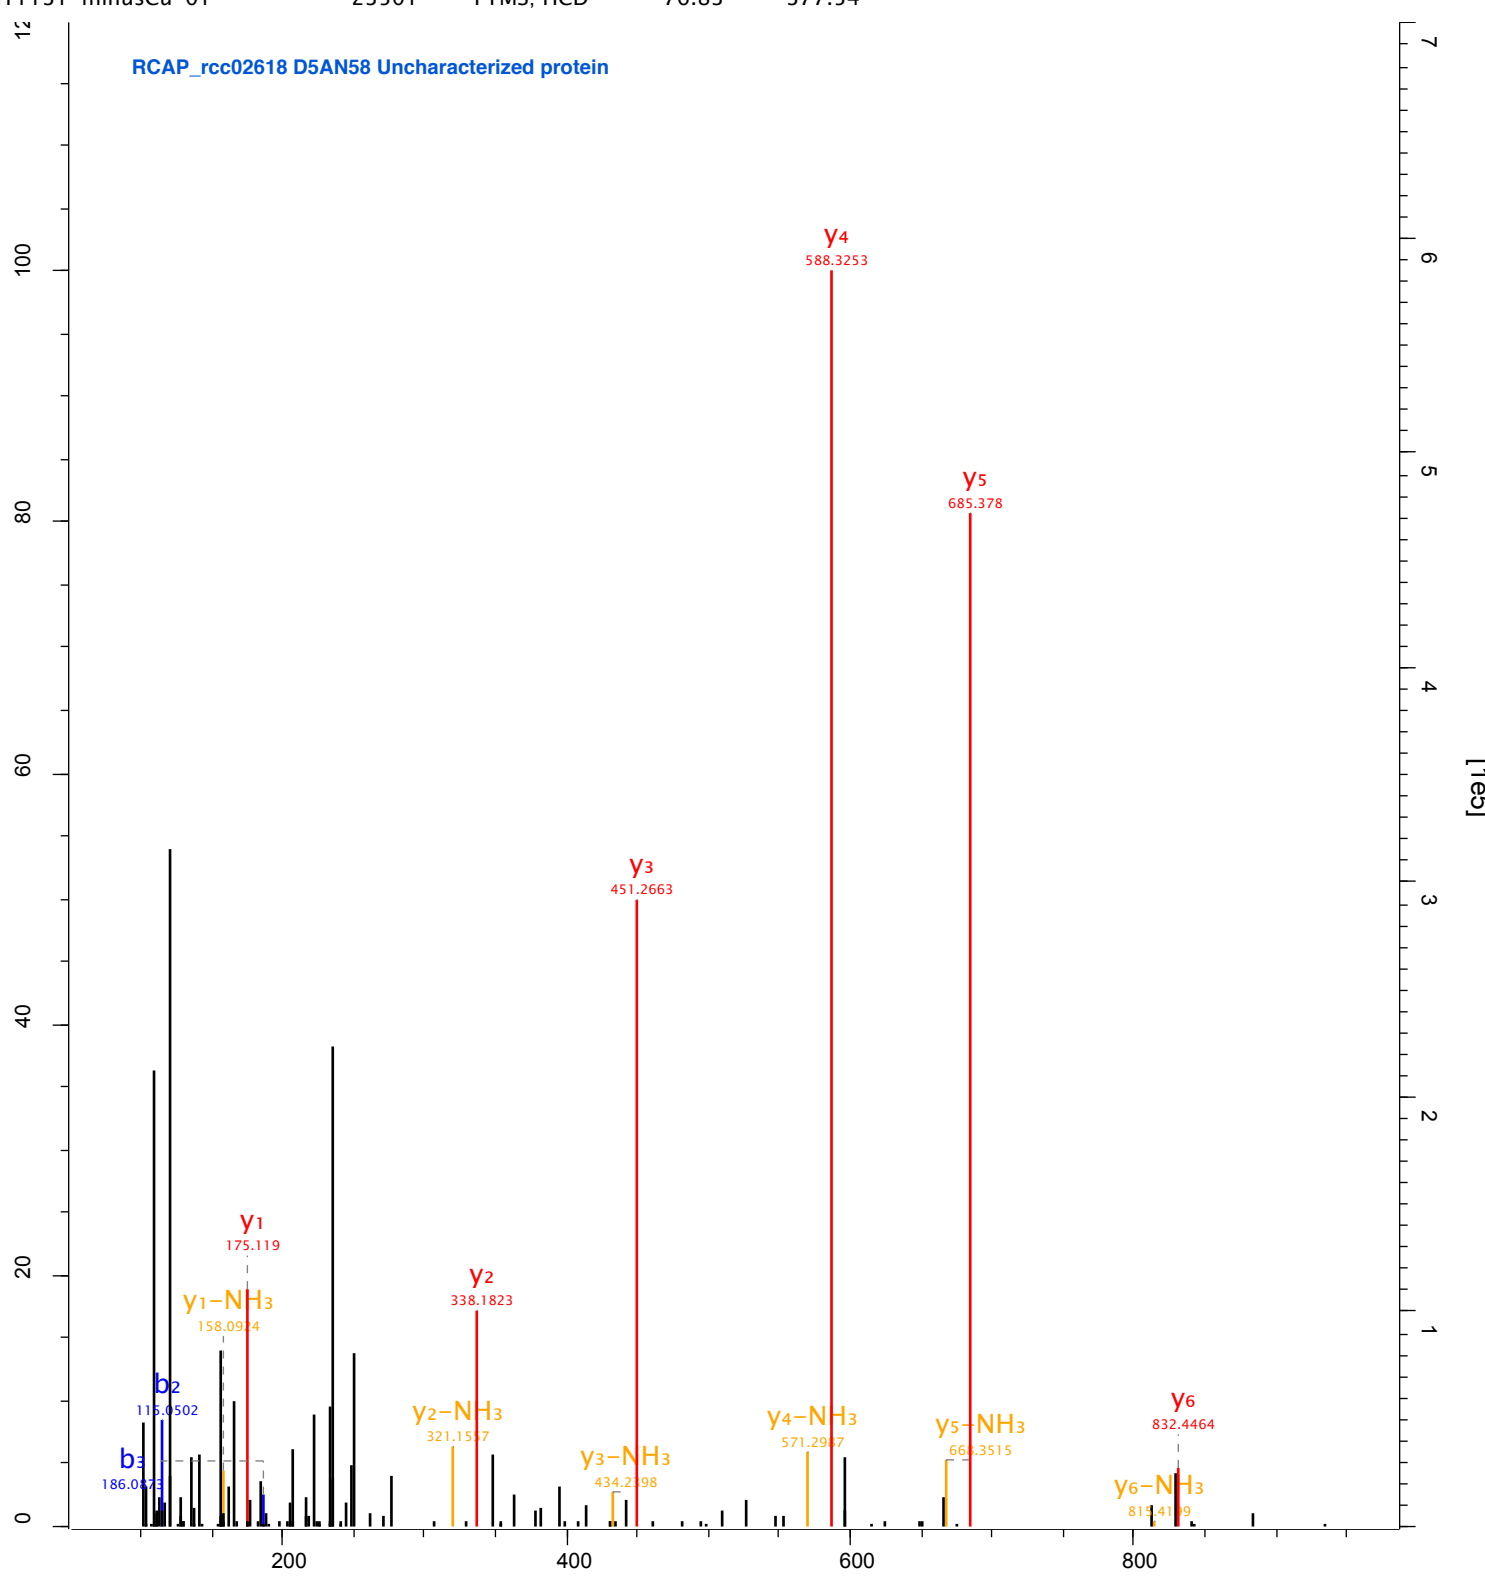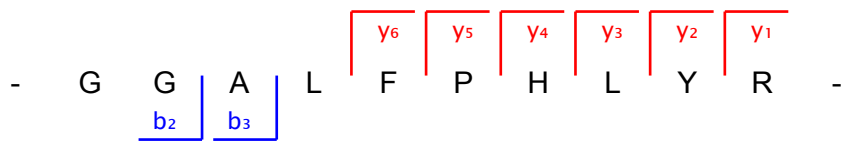

RCAP\_rcc02748 D5ANX2 Uncharacterized protein

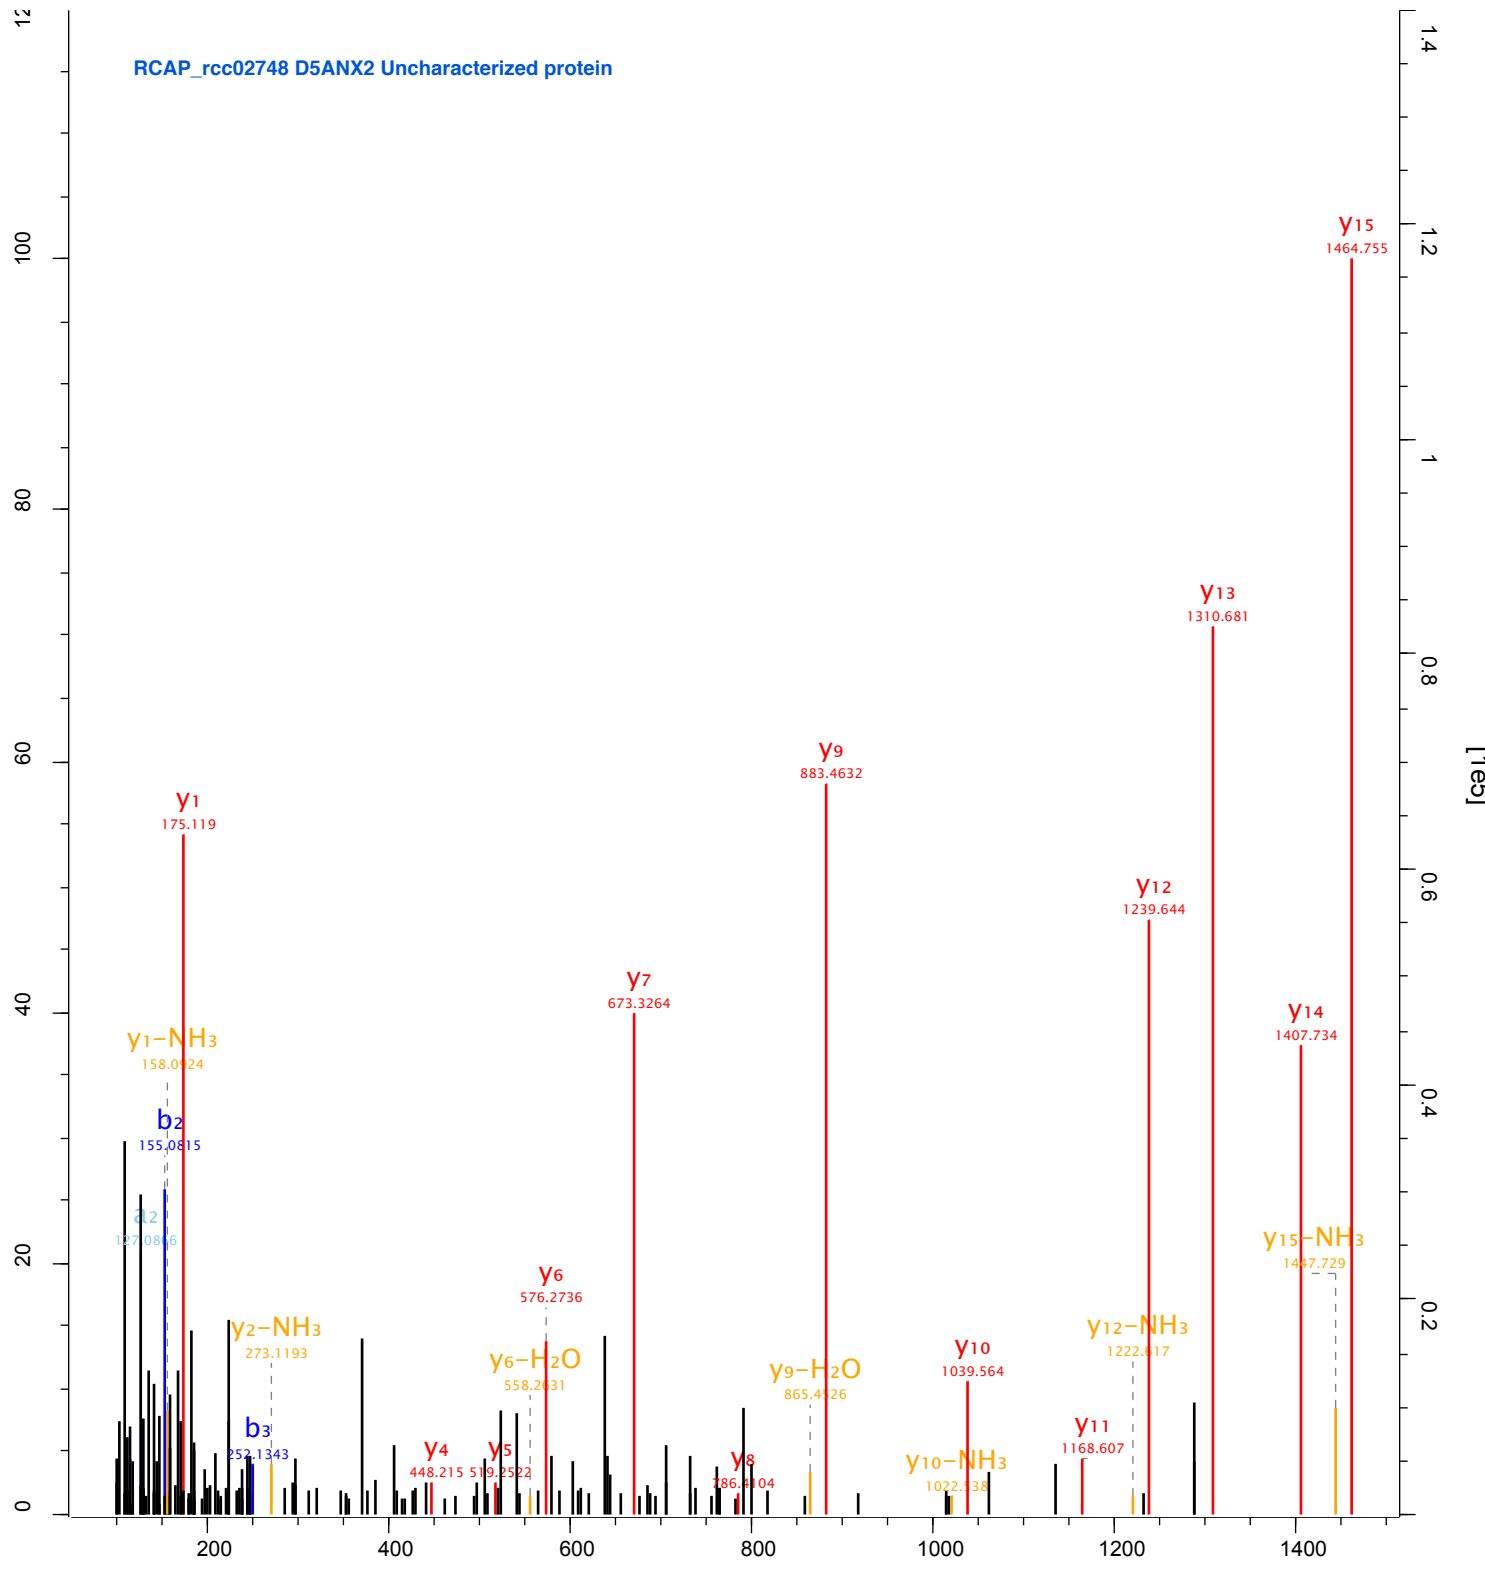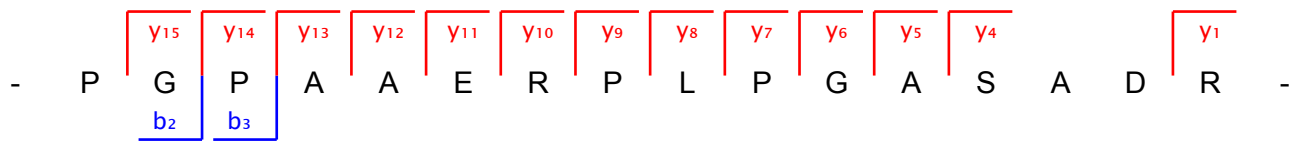

RCAP\_rcc02760 D5ANY4 TfoX N-terminal domain protein

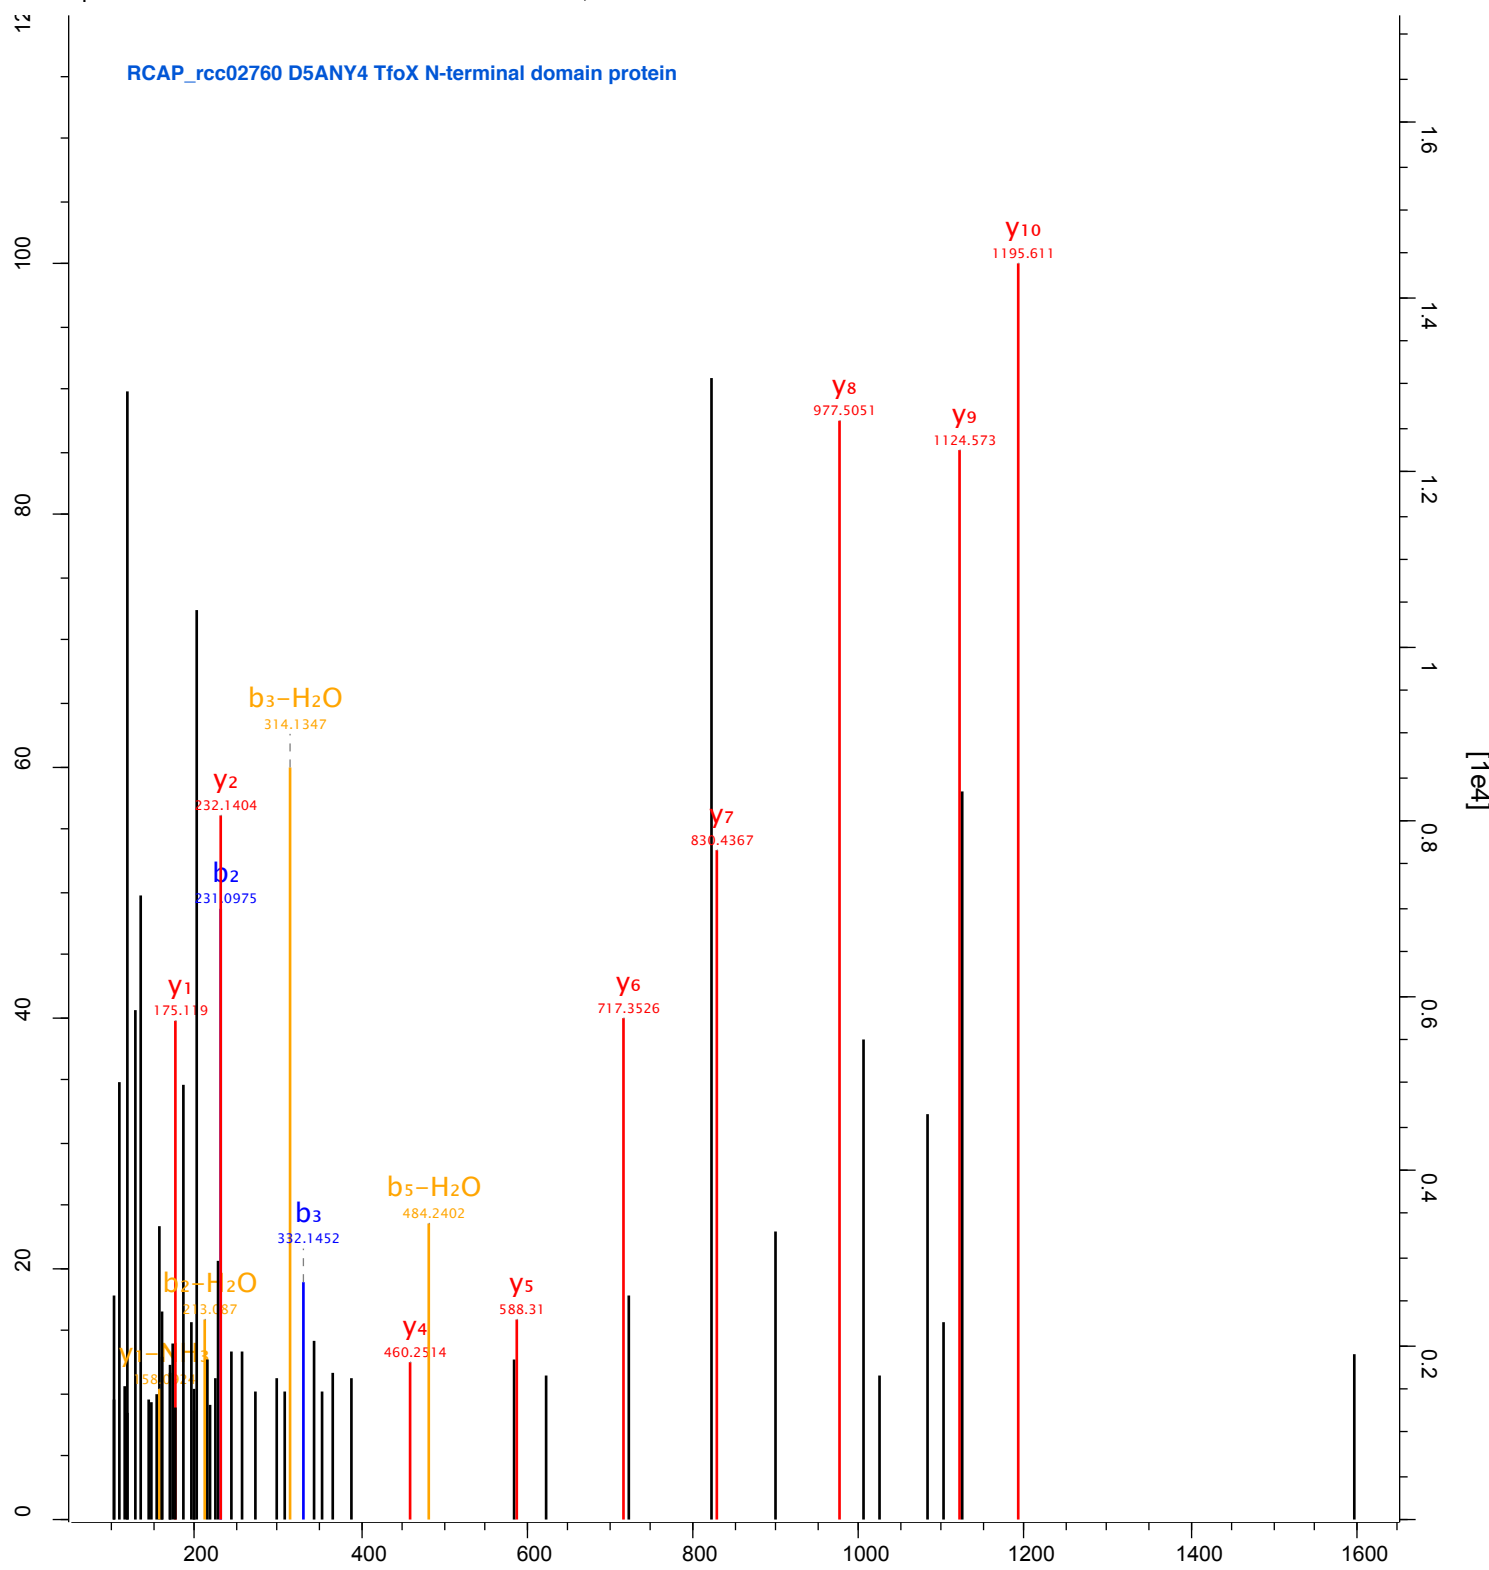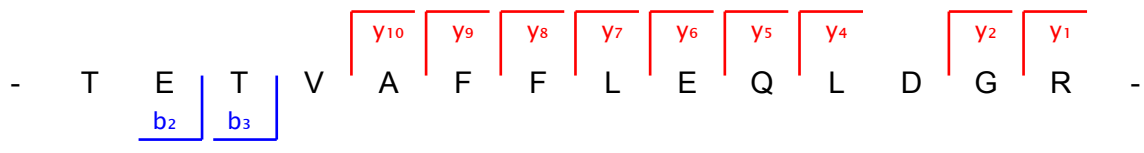

RCAP\_cc02775 D5ANZ9 Polar amino acid ABC transporter, permease protein HisQ

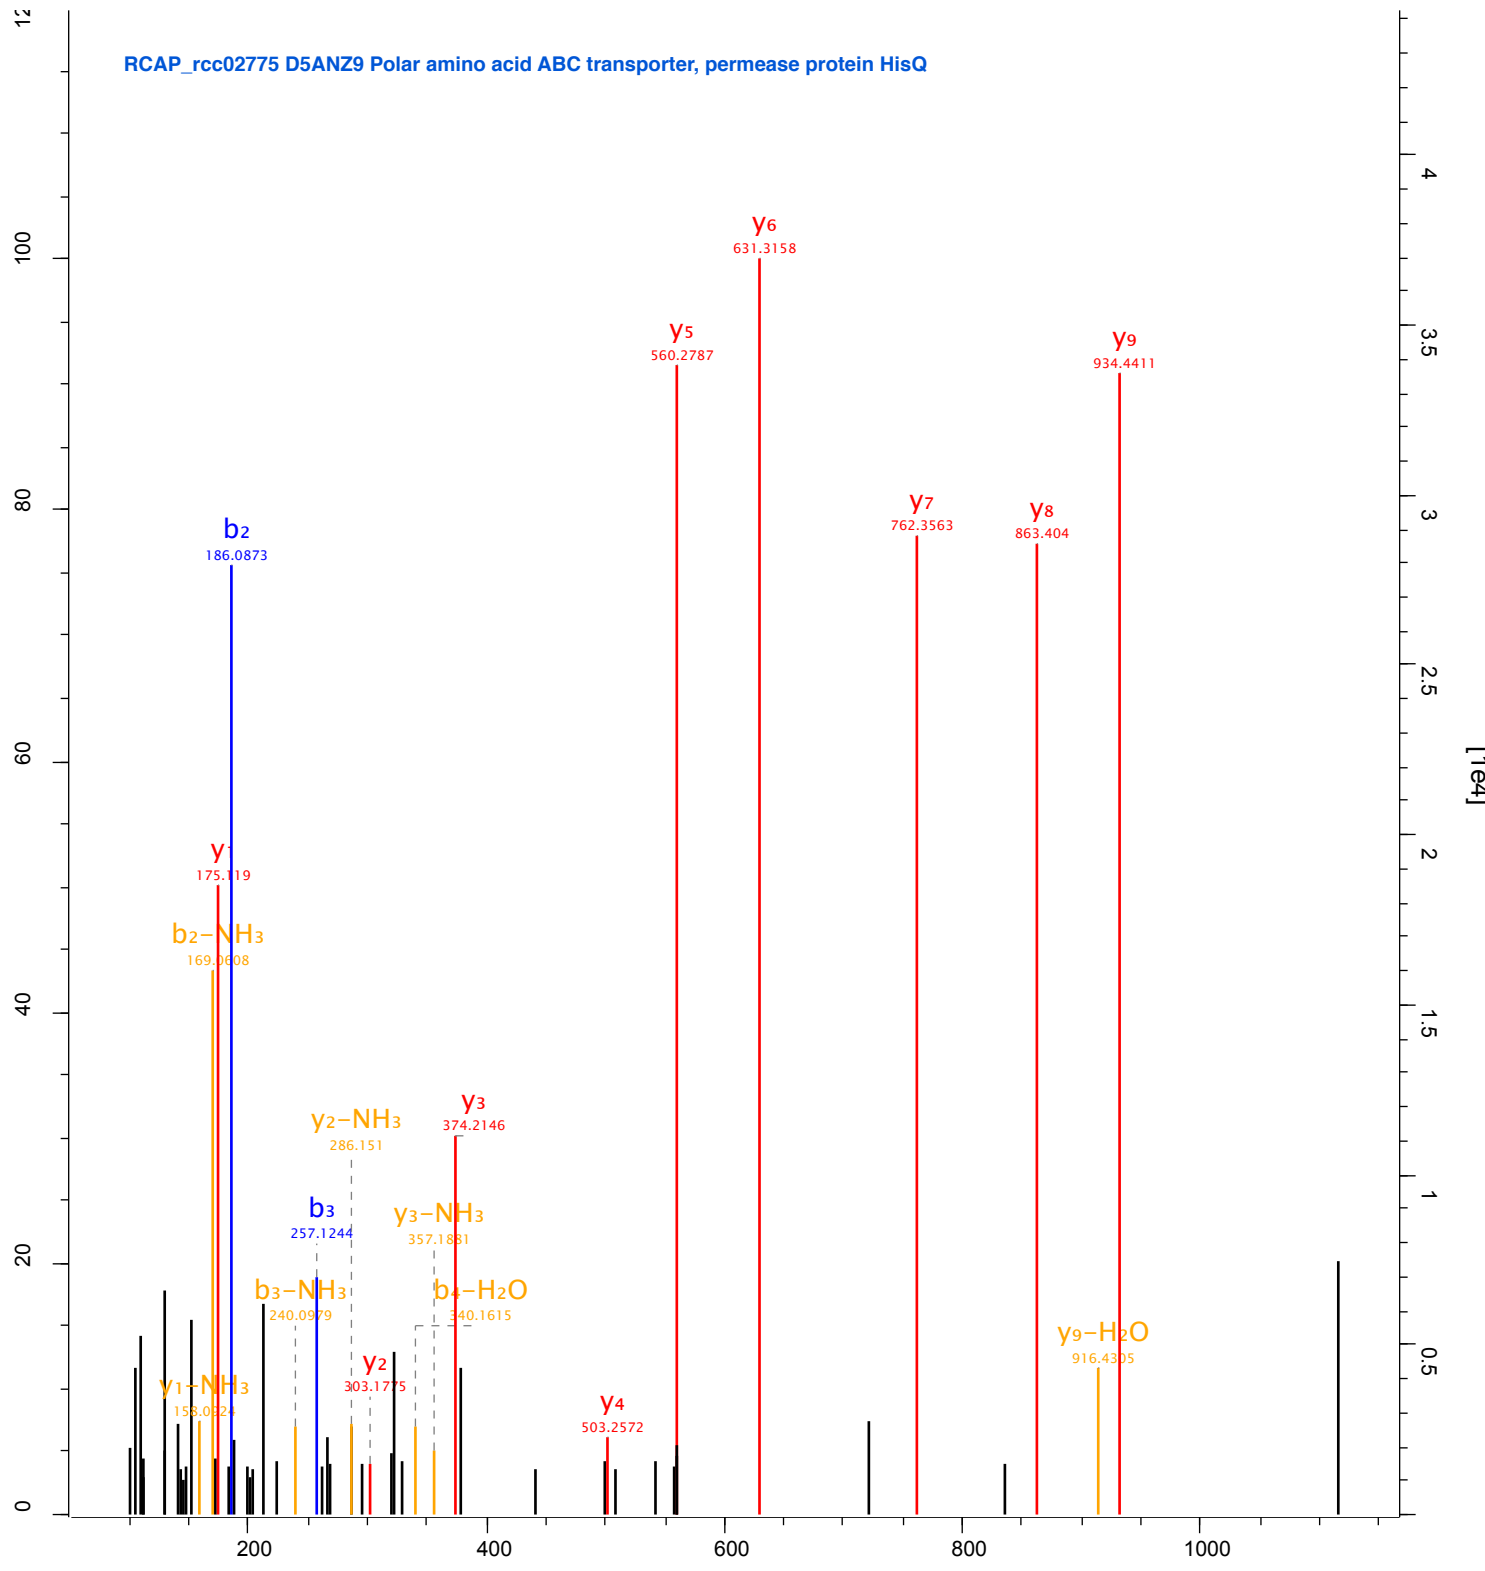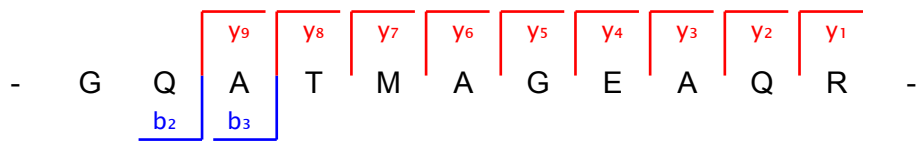

RCAP\_rcc02879 D5APN9 Monosaccharide ABC transporter, permease protein

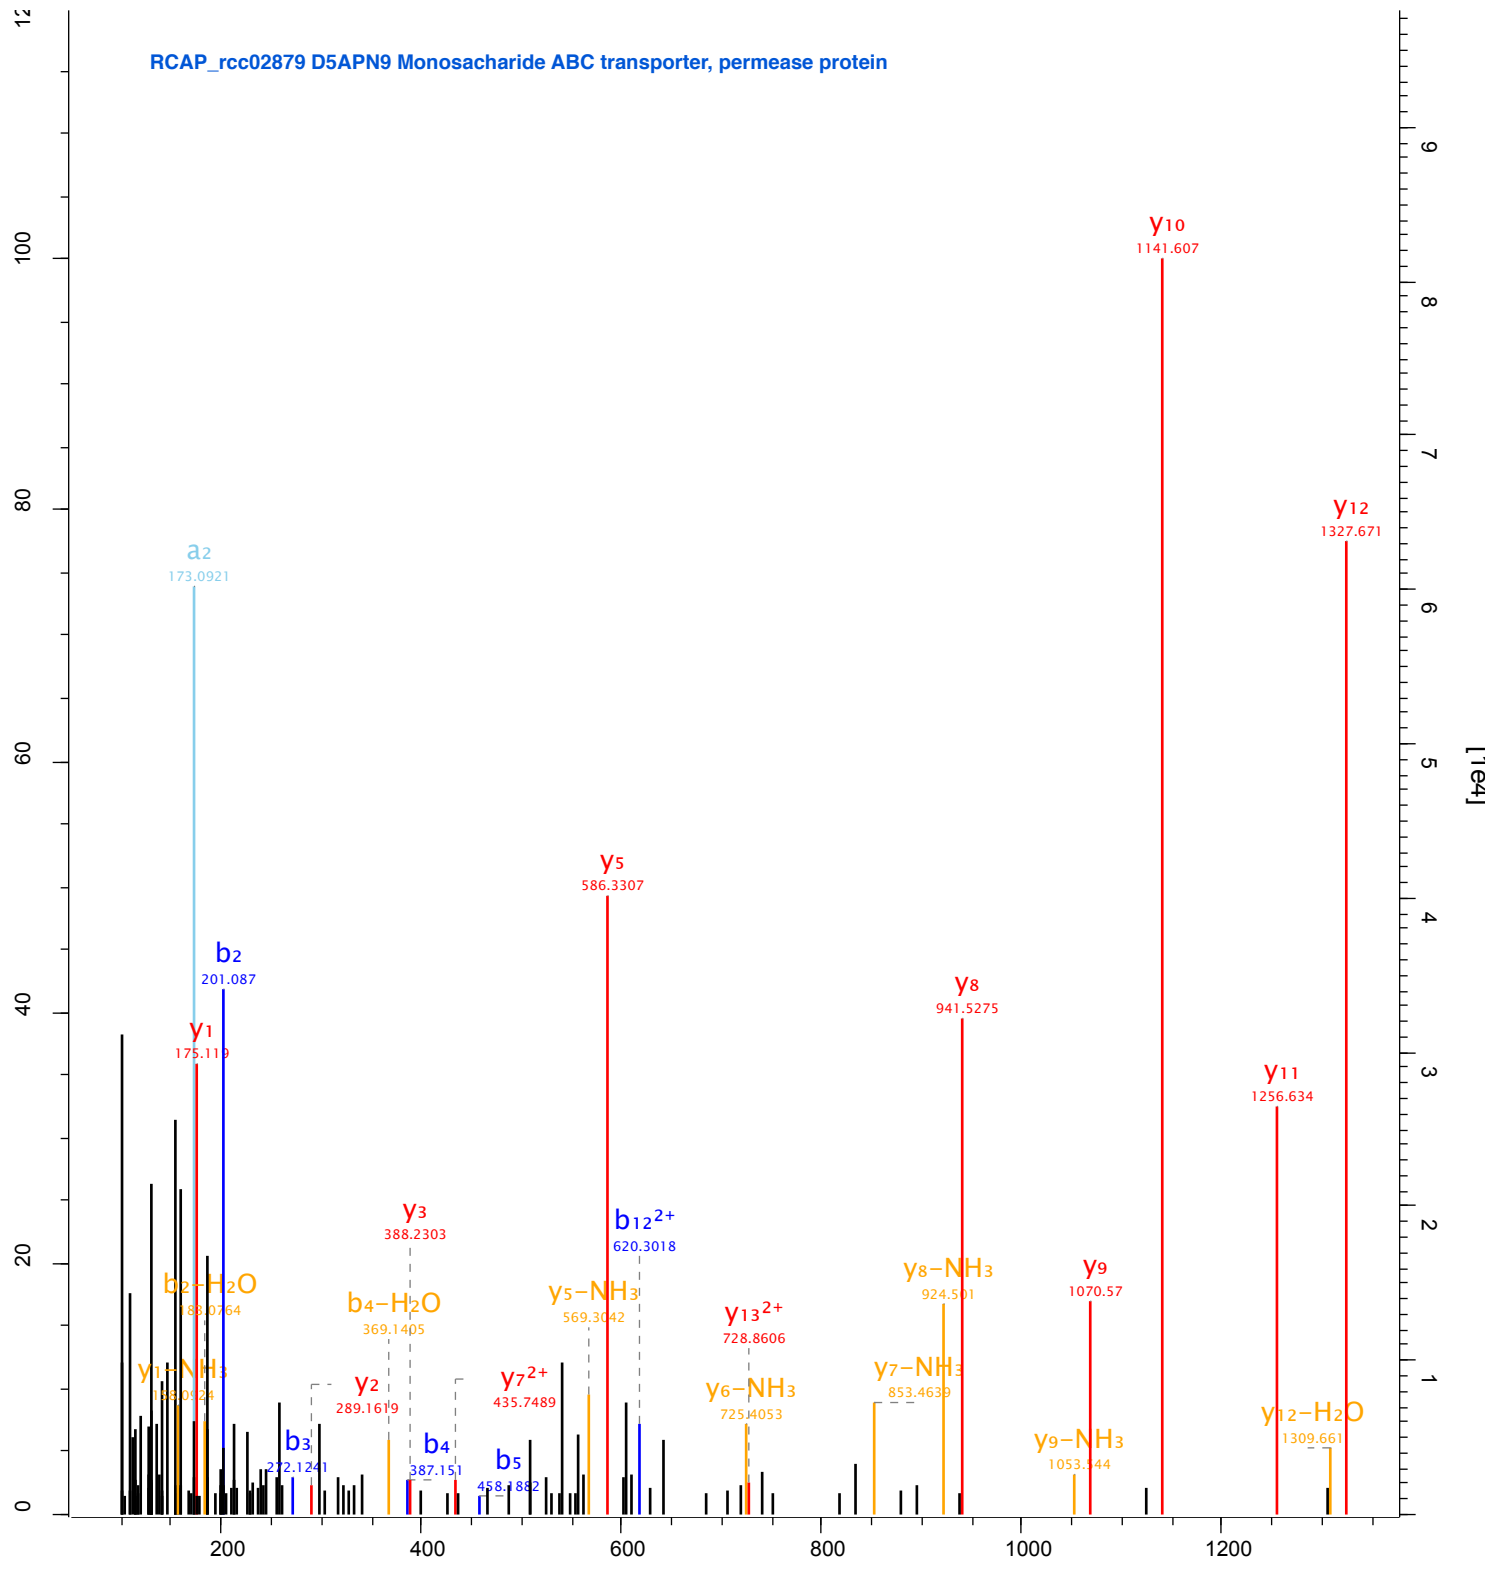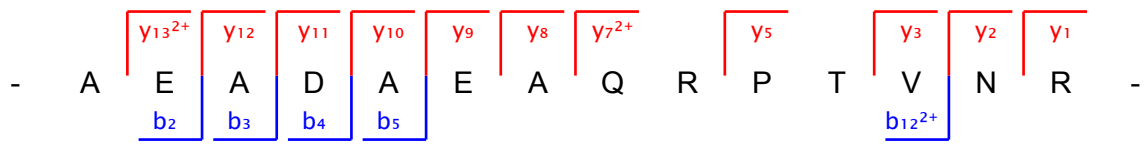

RCAP\_rcc03010 D5AQE8 Uncharacterized protein

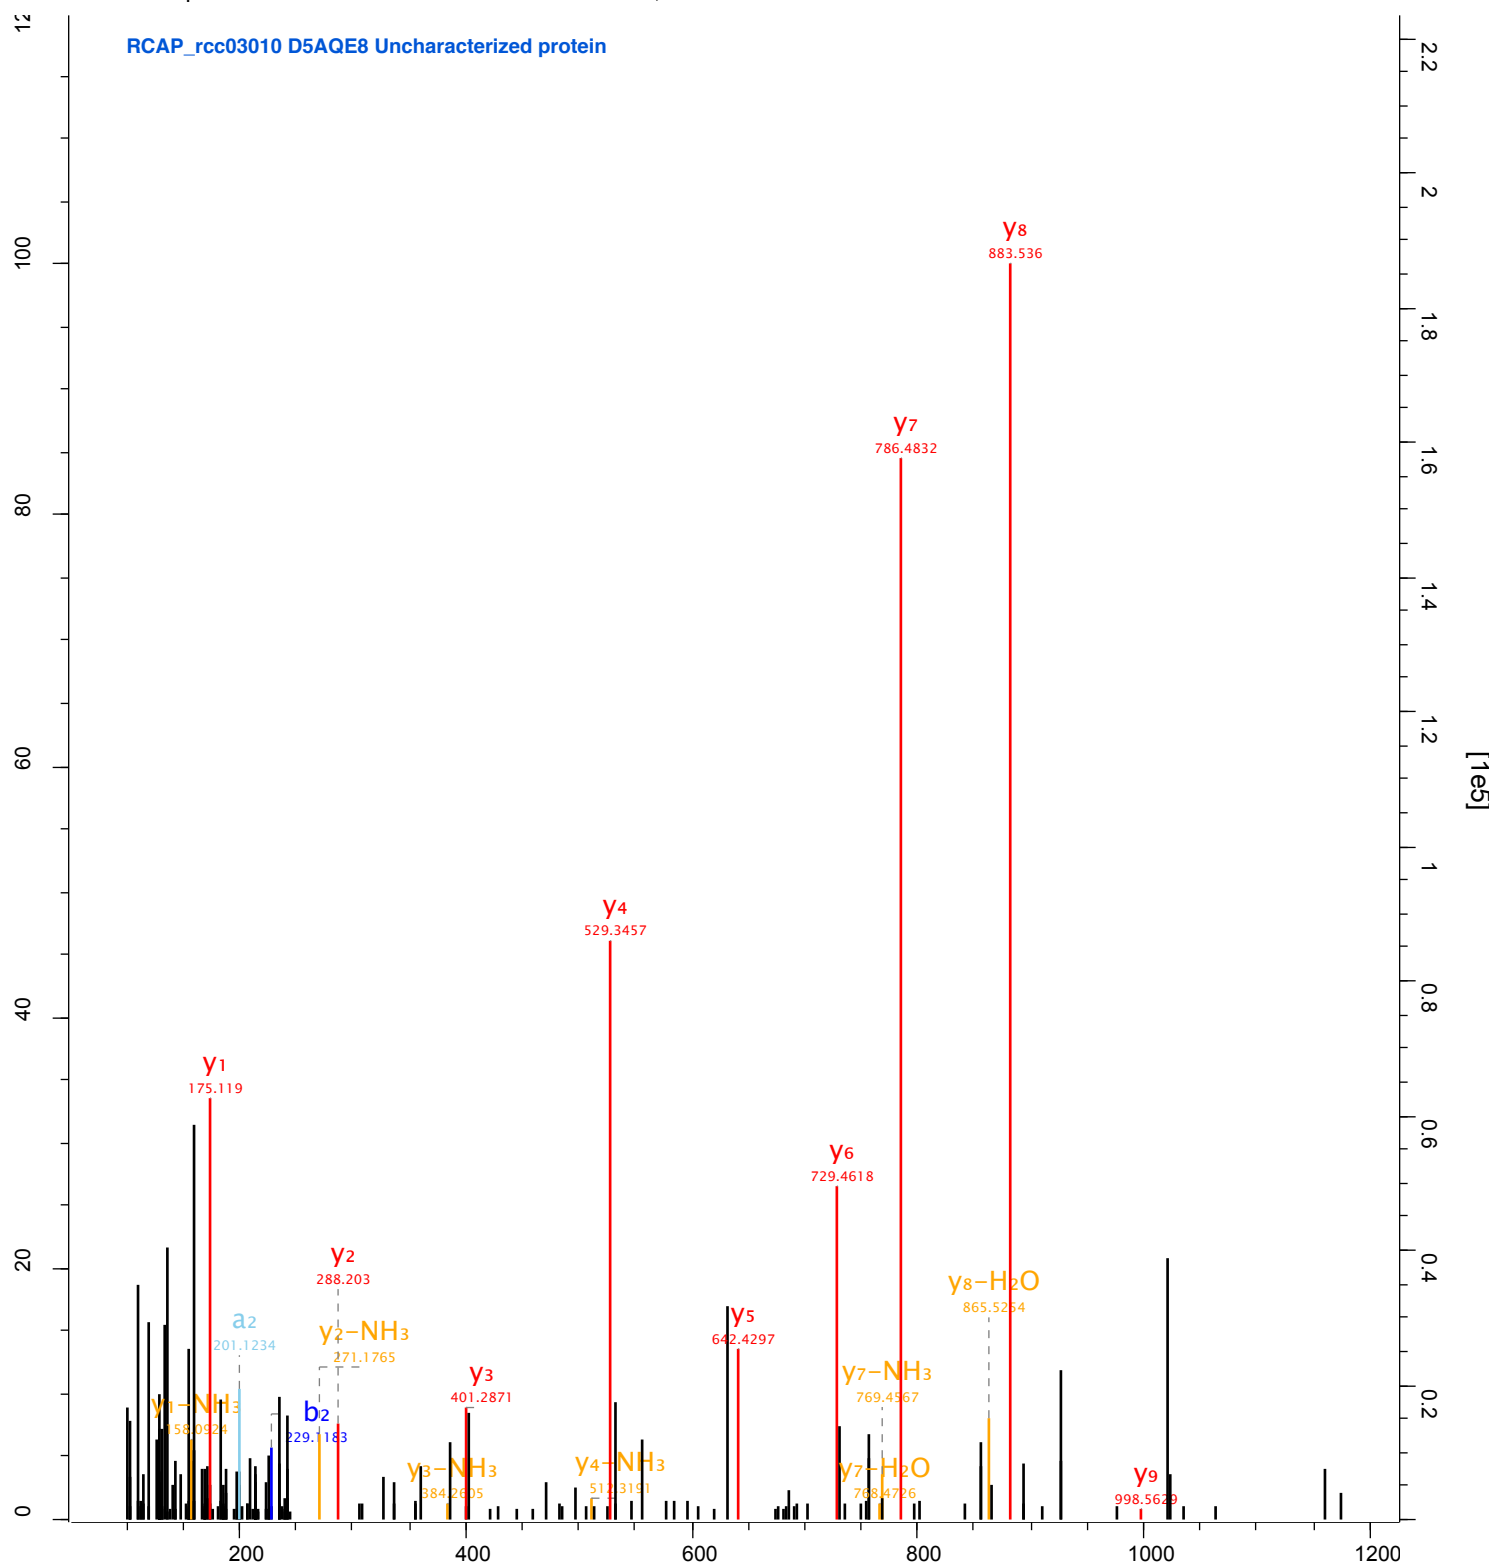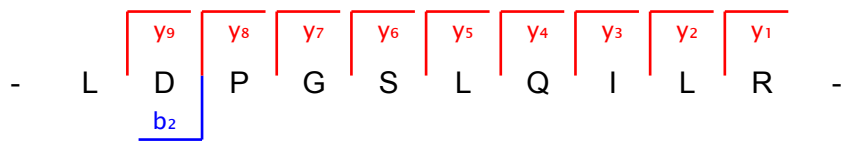

RCAP\_rcc03112 D5AQP7 Uncharacterized protein

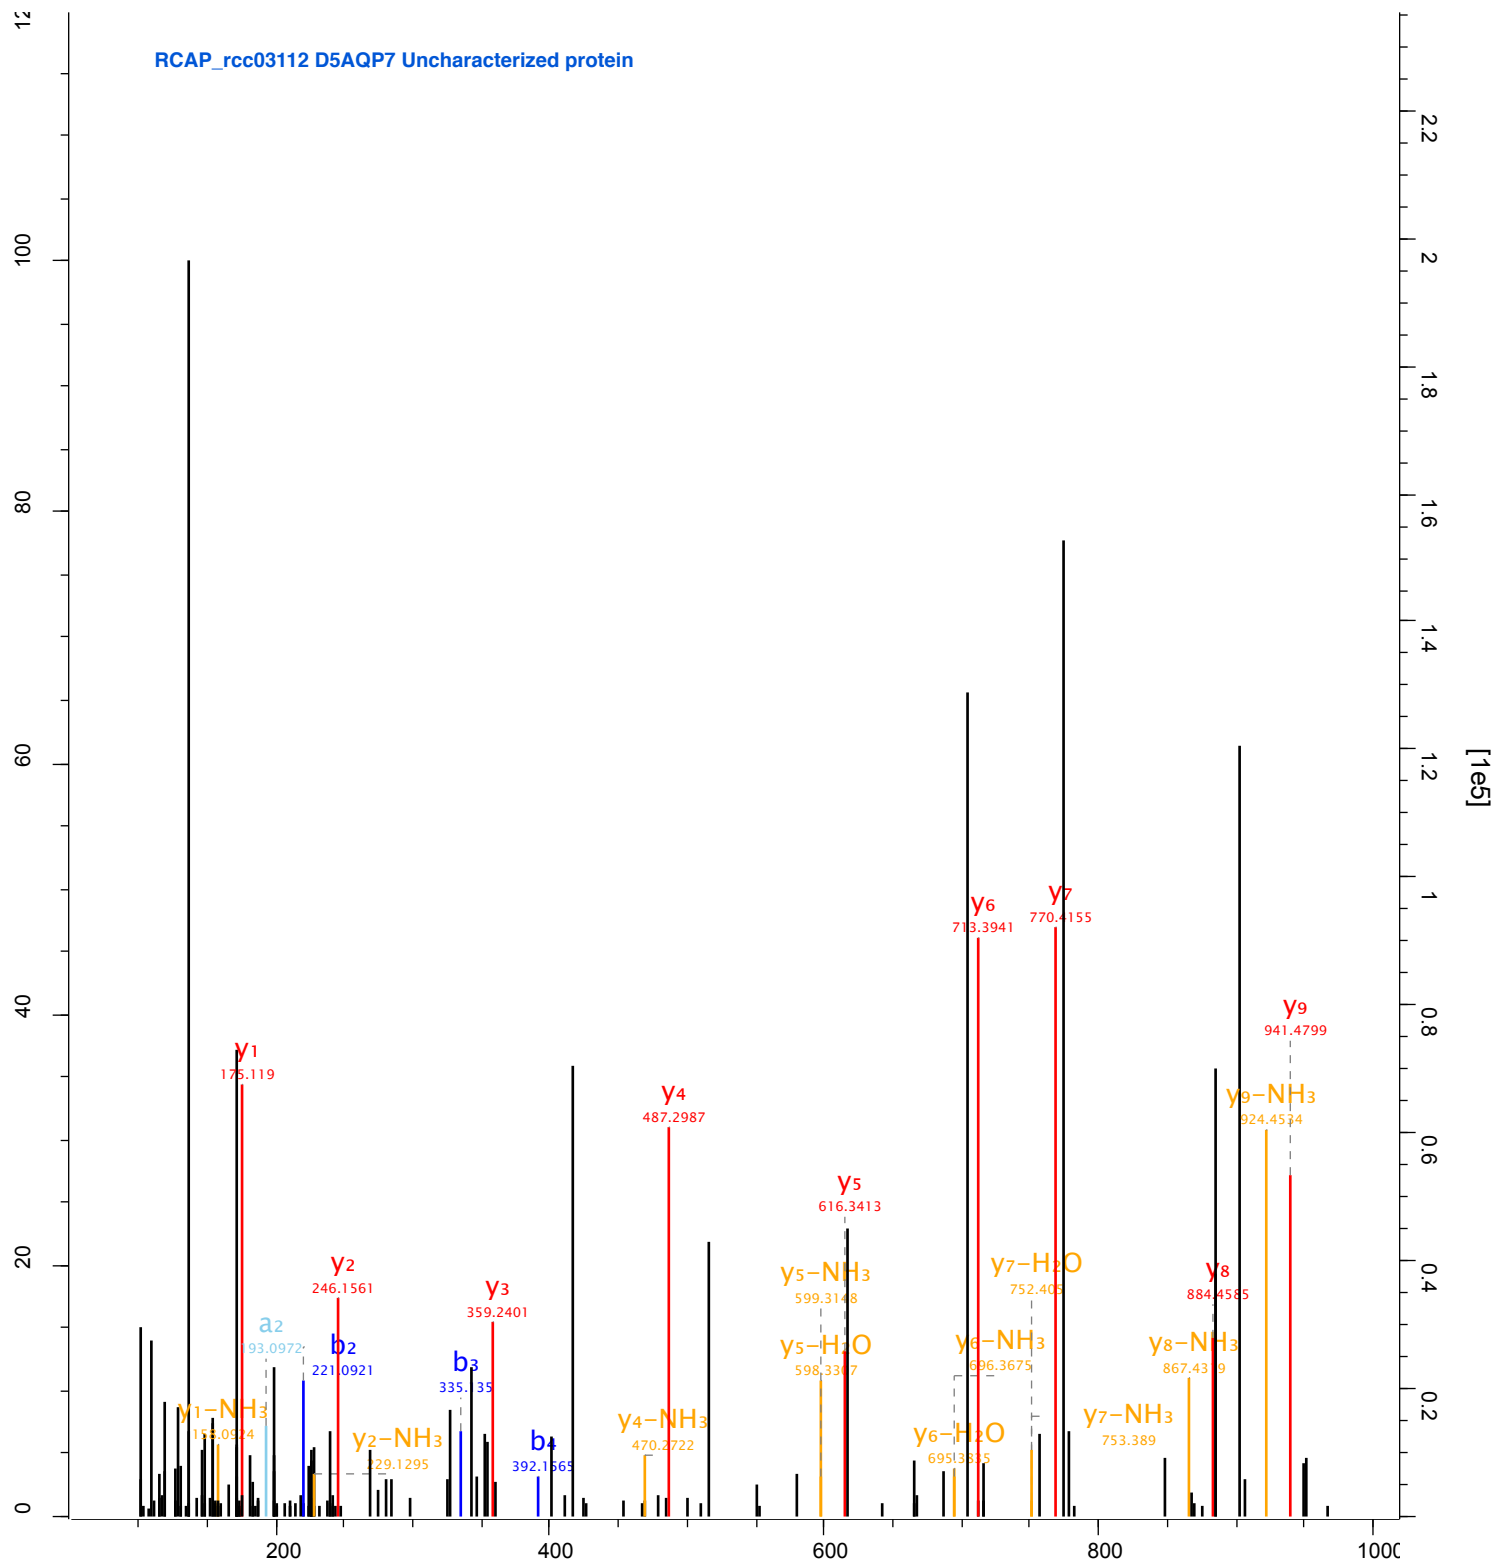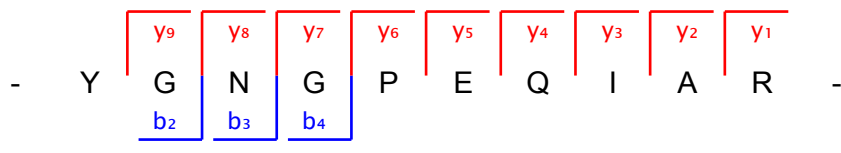



RCAP\_rcc03185 D5ARA4 Membrane protein, putative

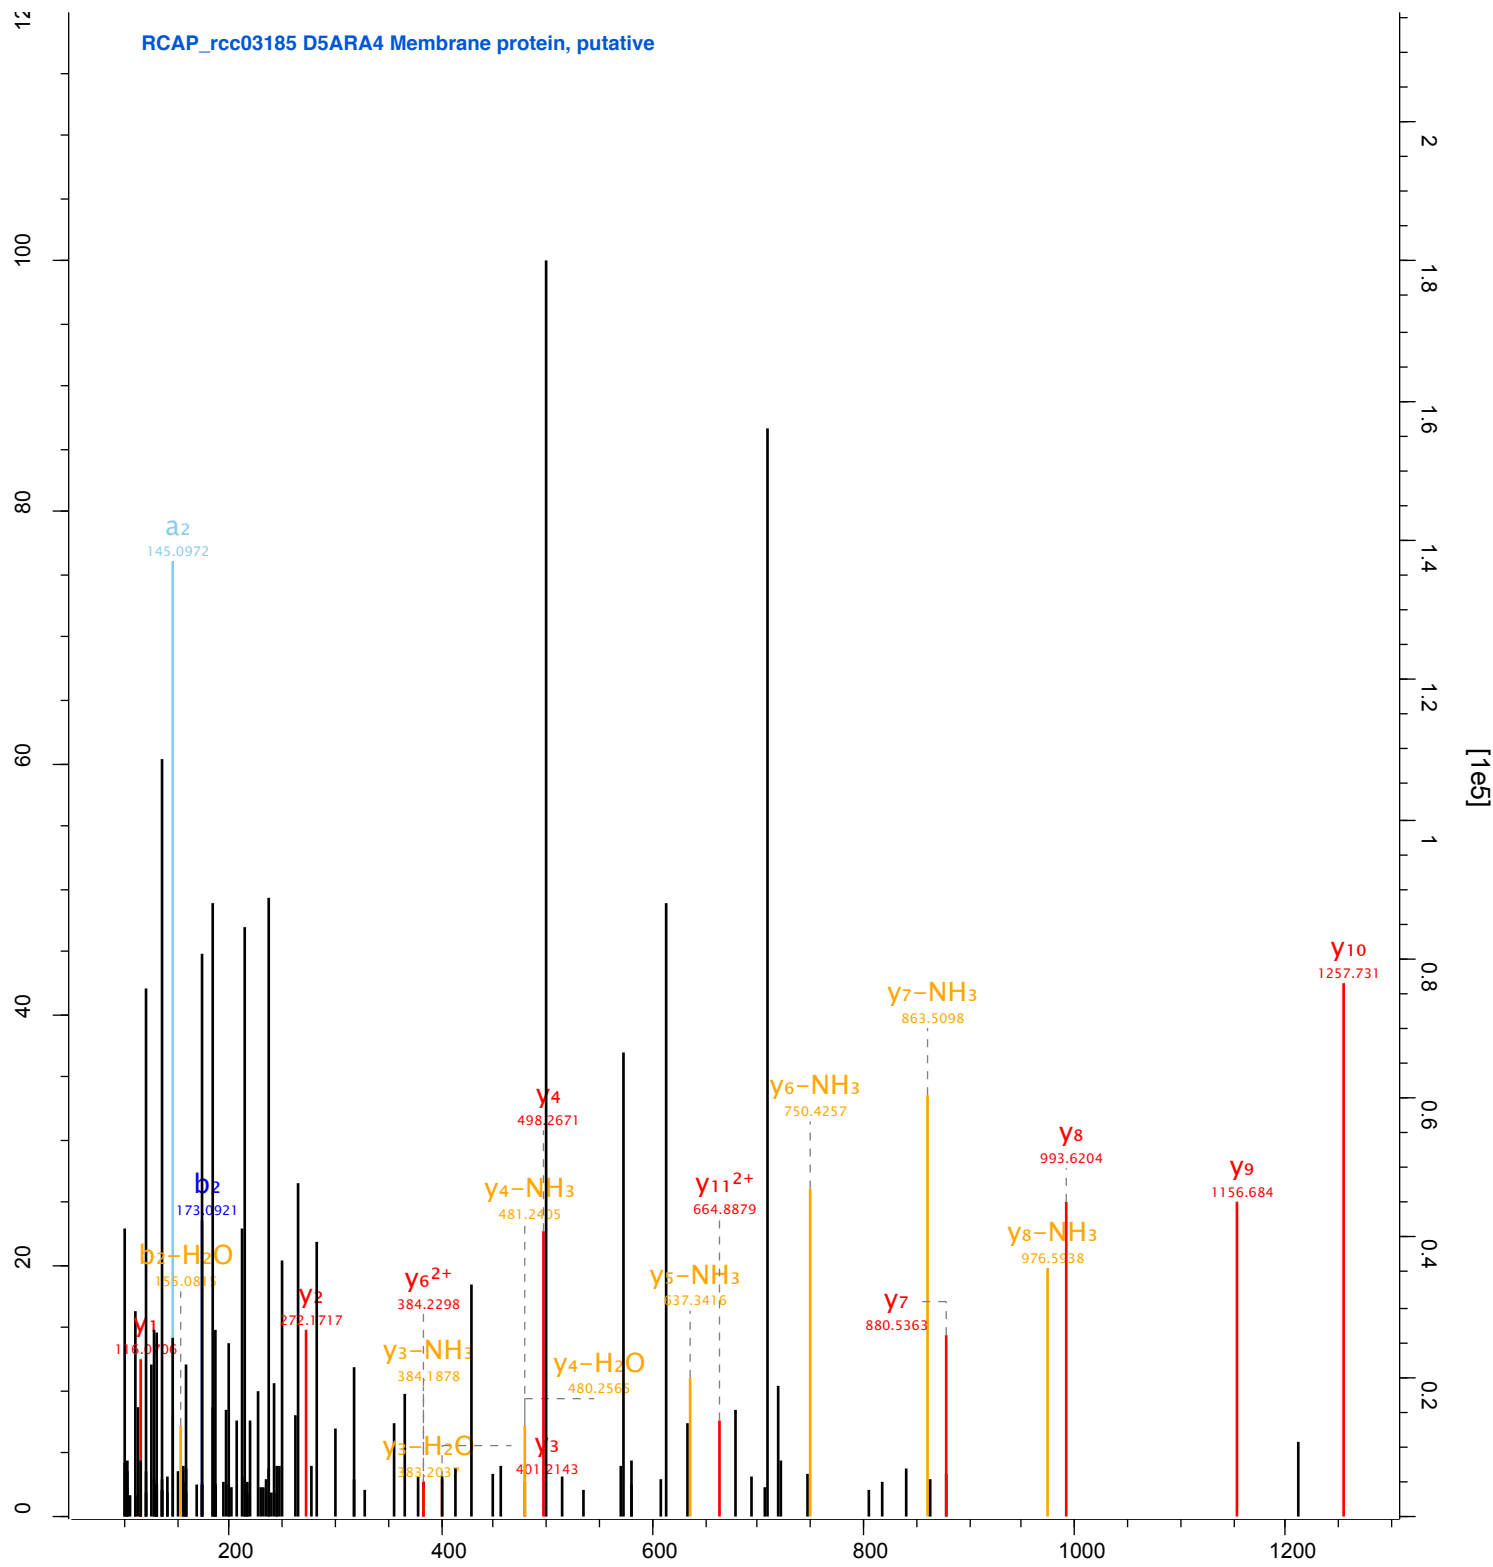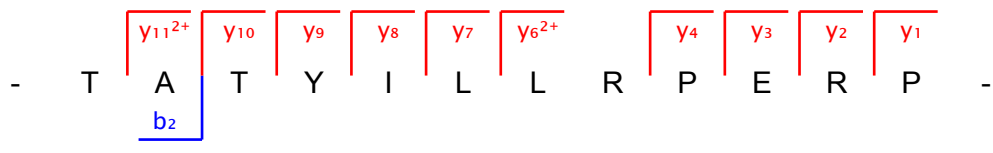

RCAP\_rcc03234 D5ARF3 Monosaccharide ABC transporter, permease protein

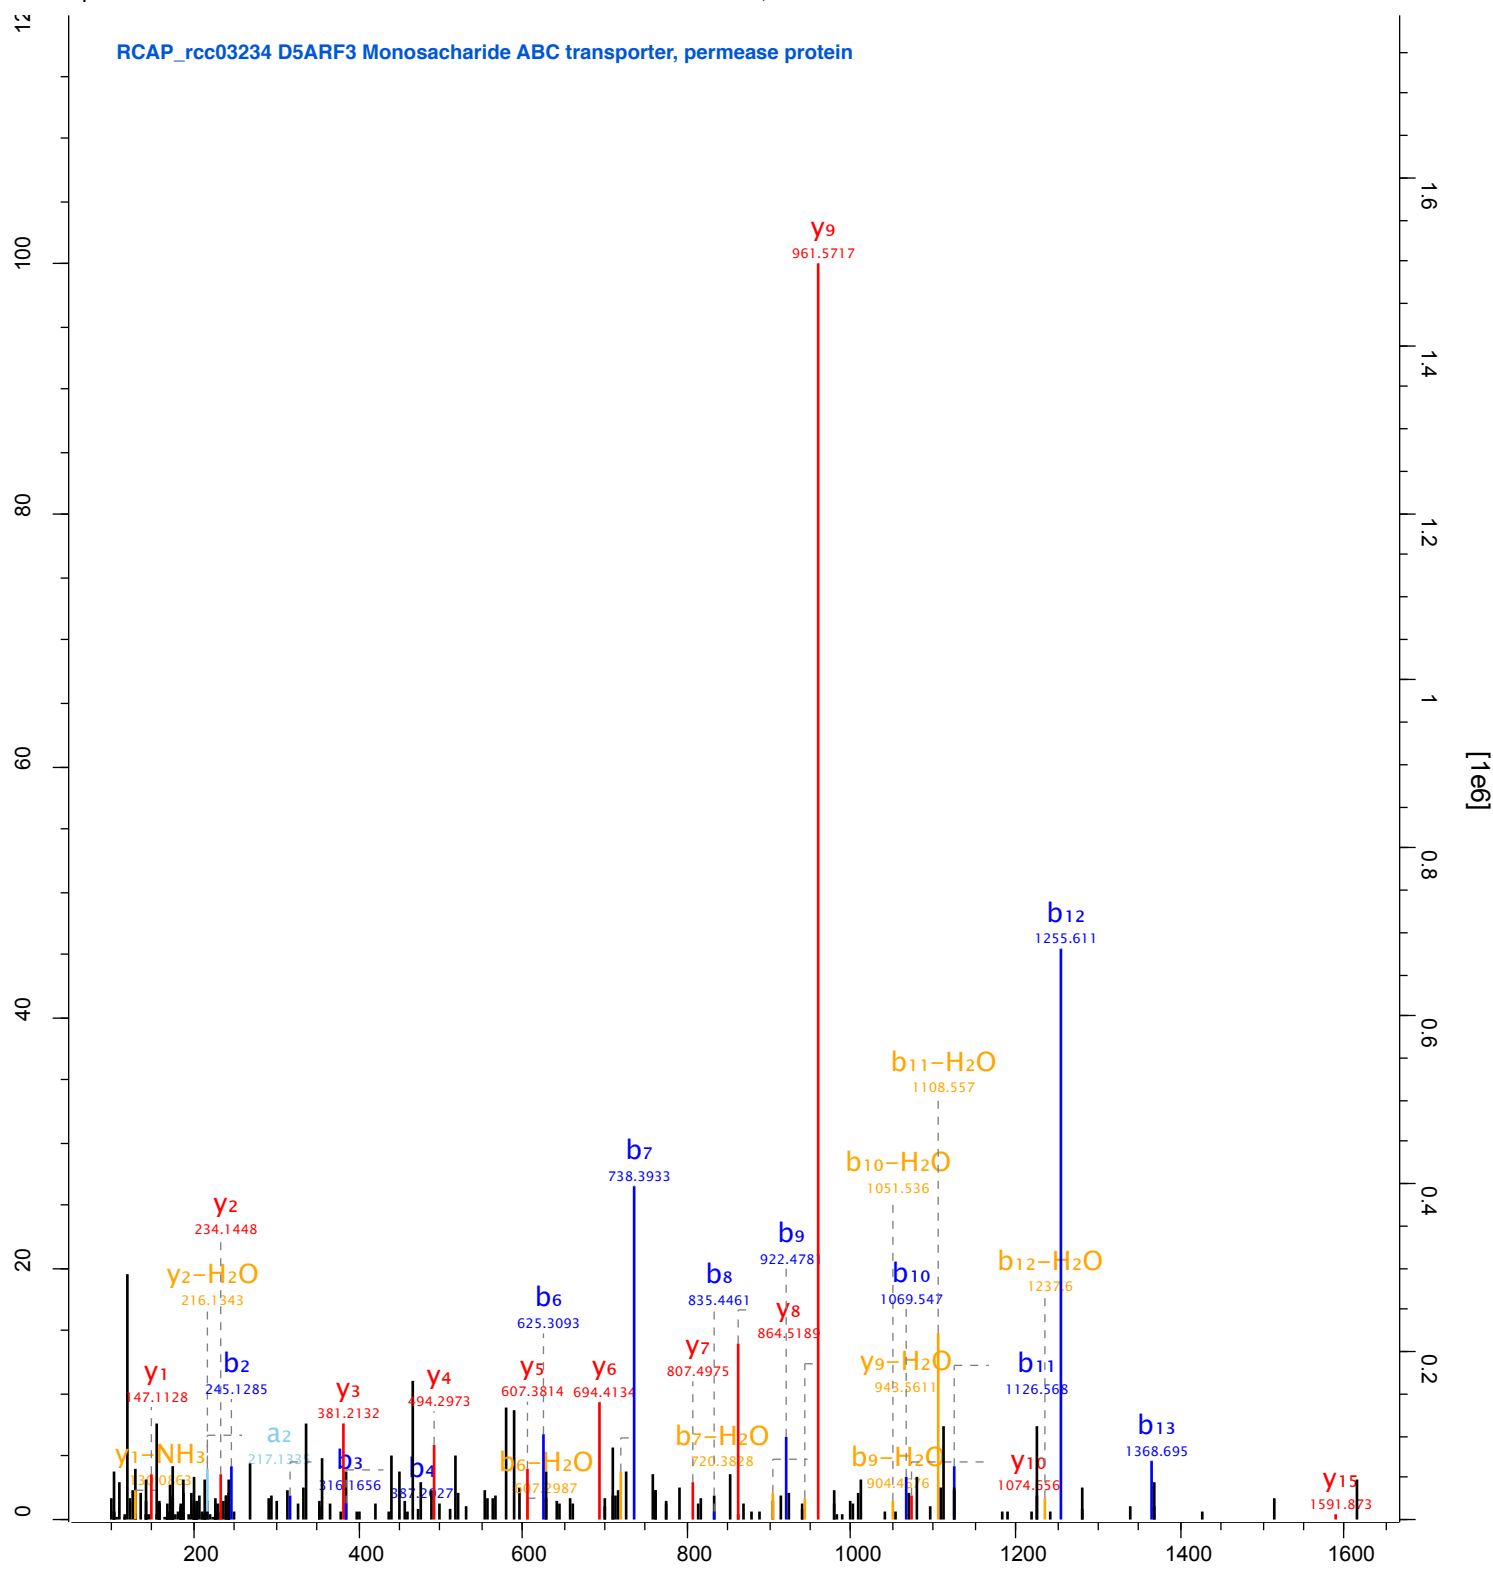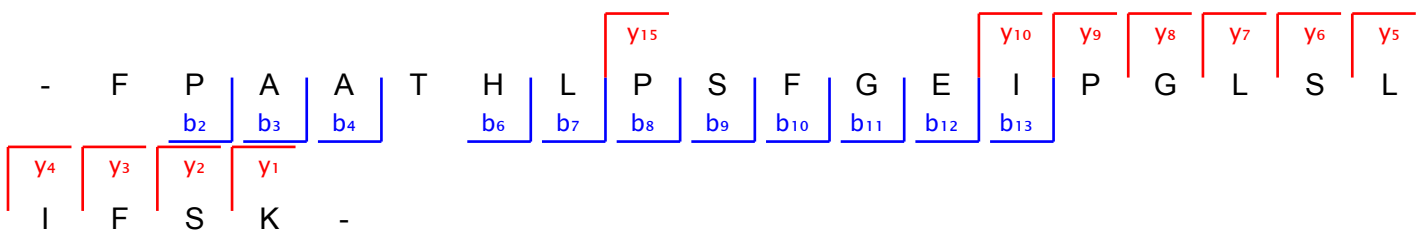

RCAP\_rcc03250 D5ARG9 Energy-coupling factor transporter transmembrane protein BioN

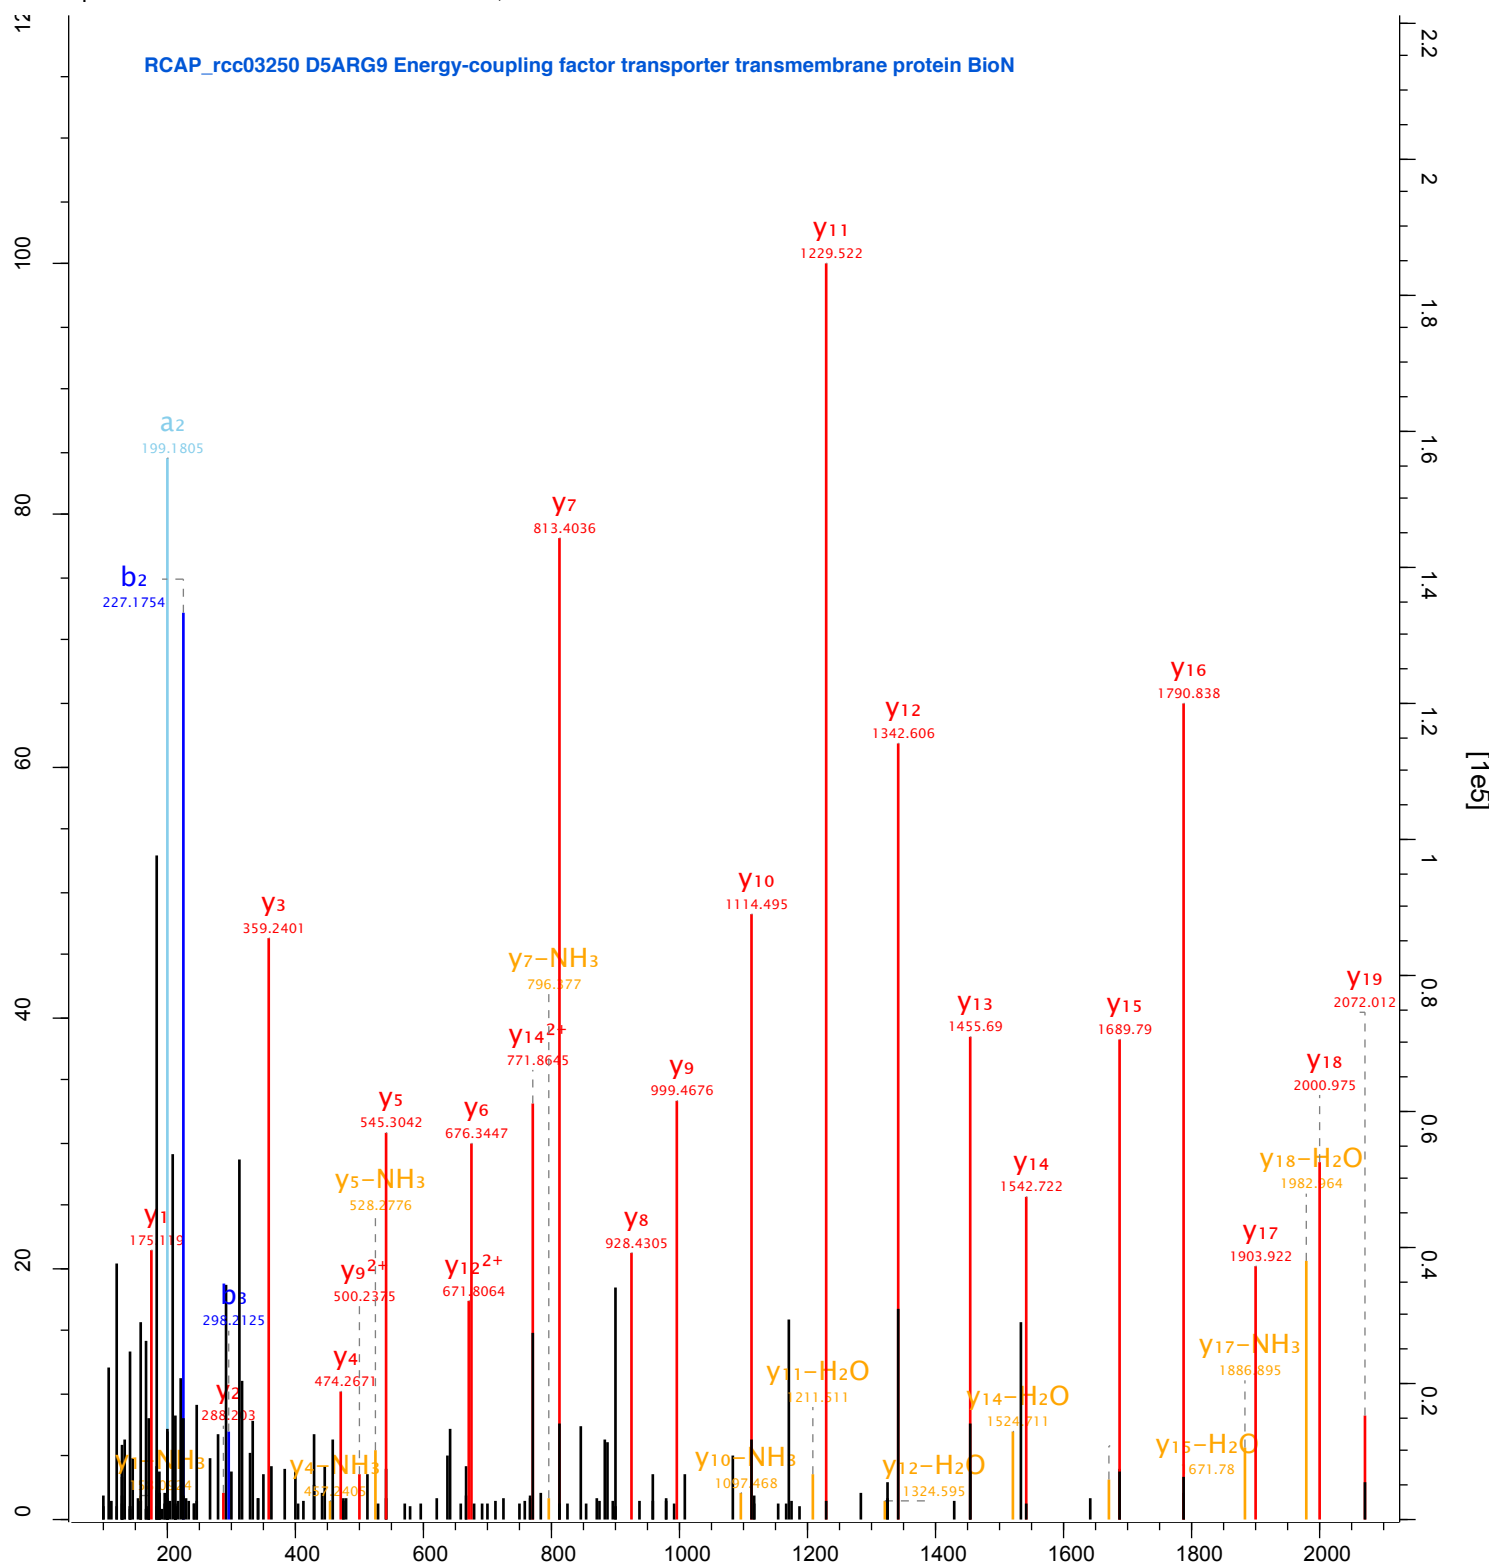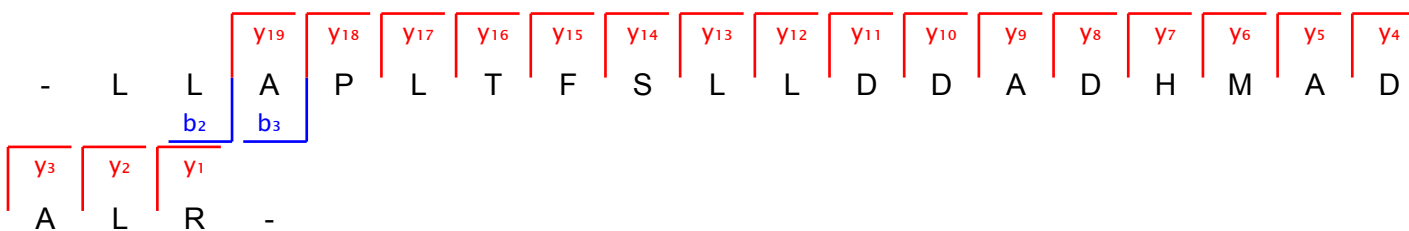

RCAP\_rcc03257 D5ARV9 Peptide methionine sulfoxide reductase MsrA

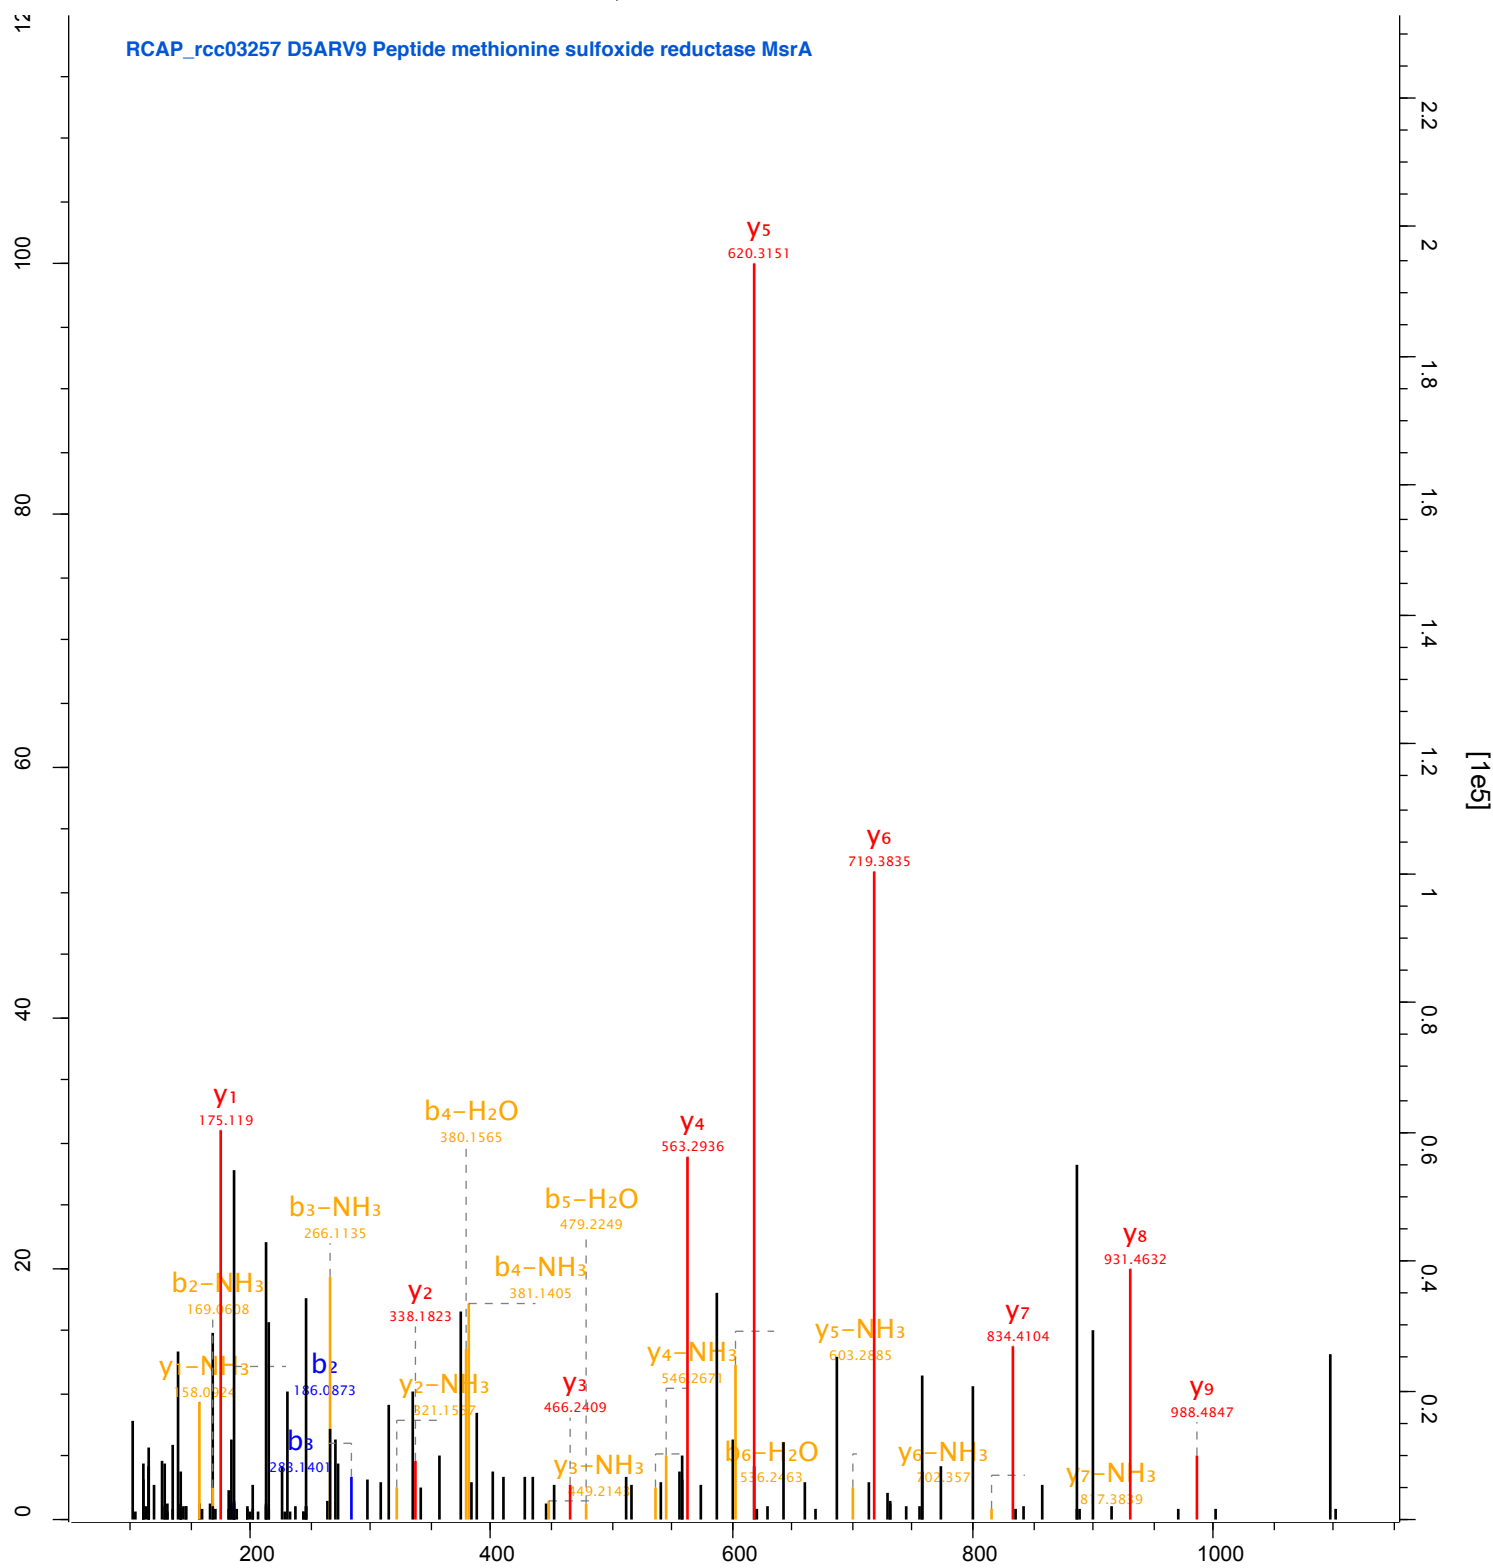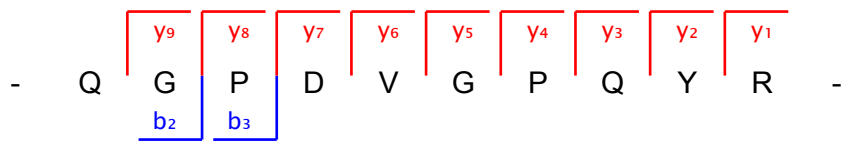

RCAP\_rcc03386 D5ASL9 Ammonium transporter

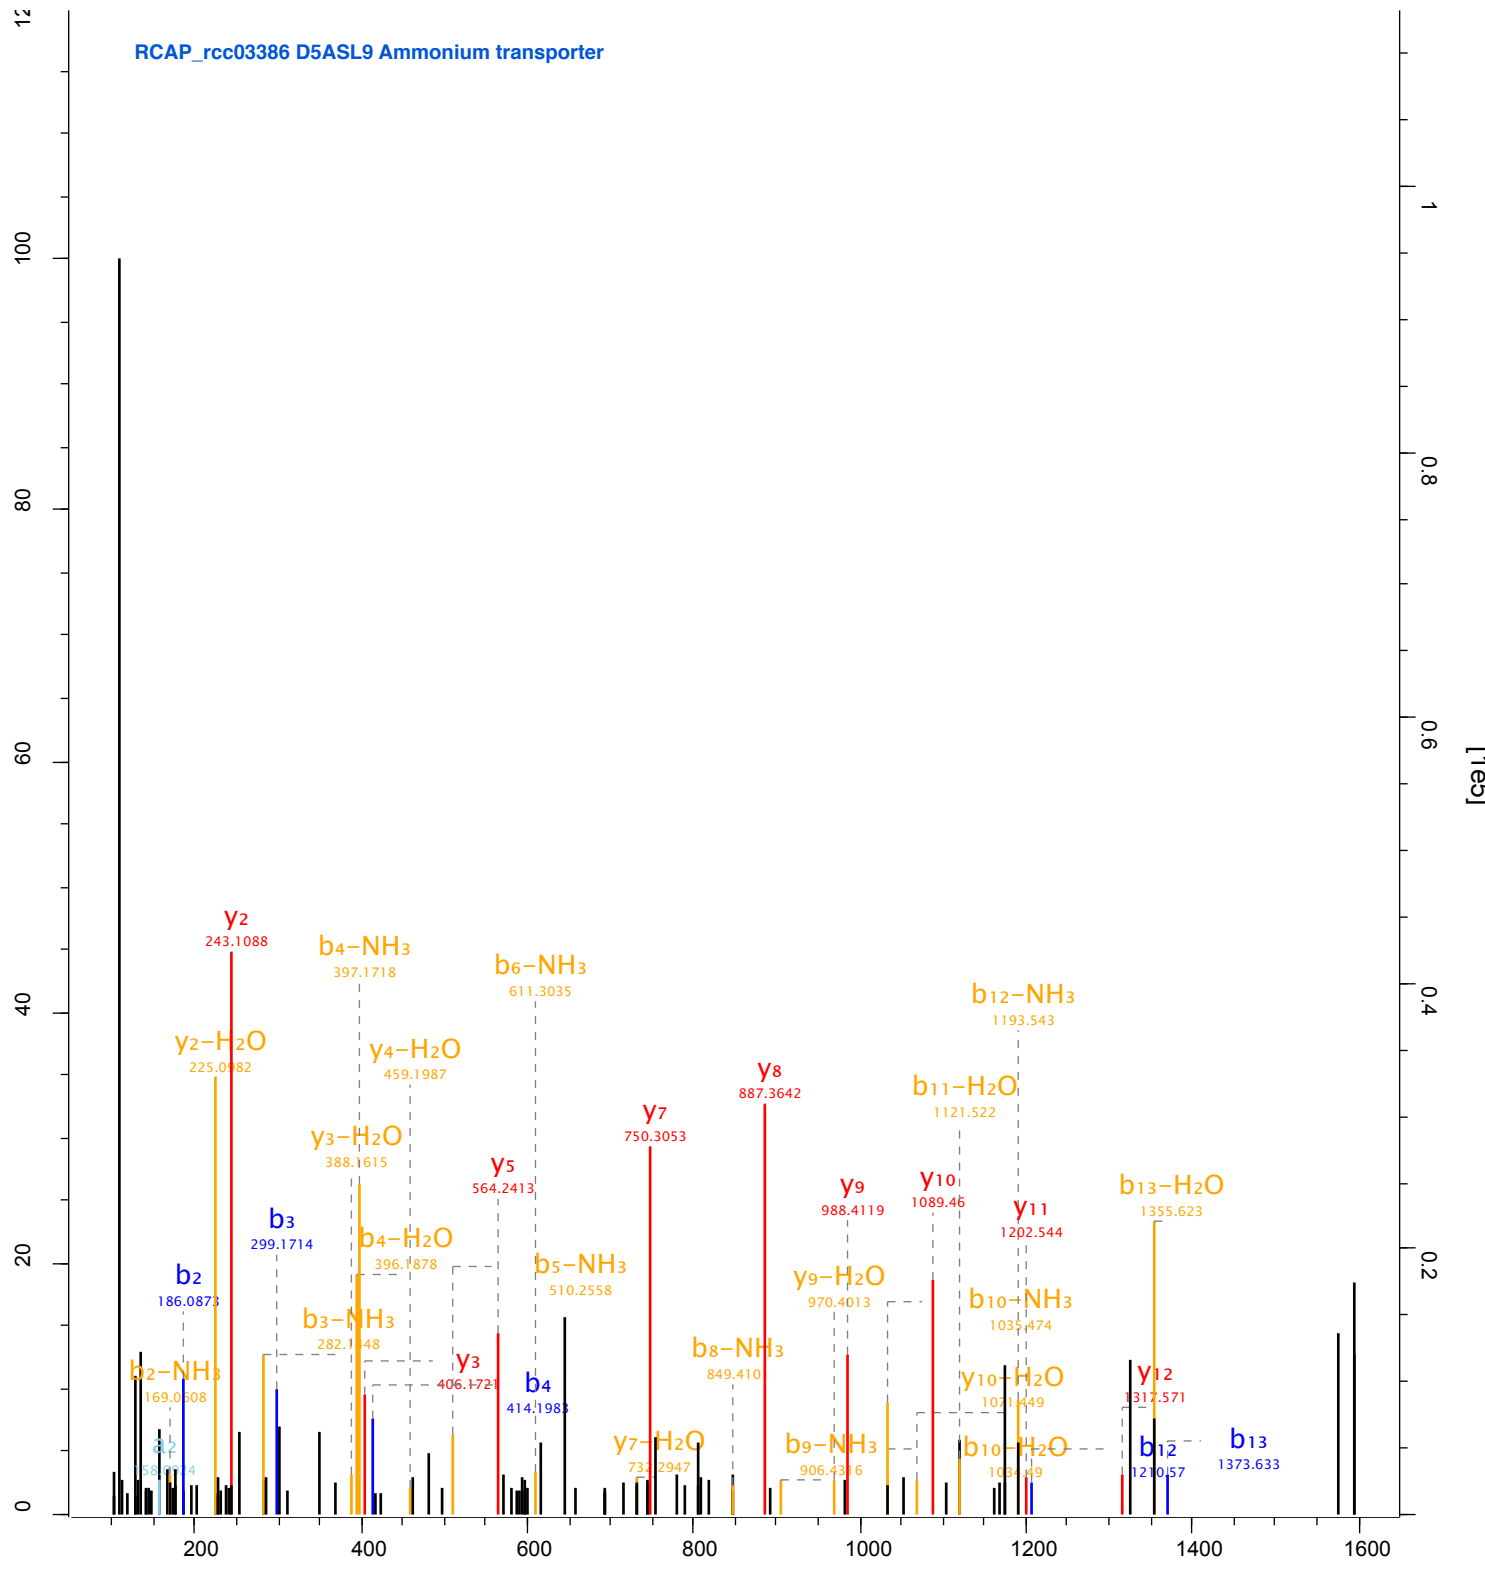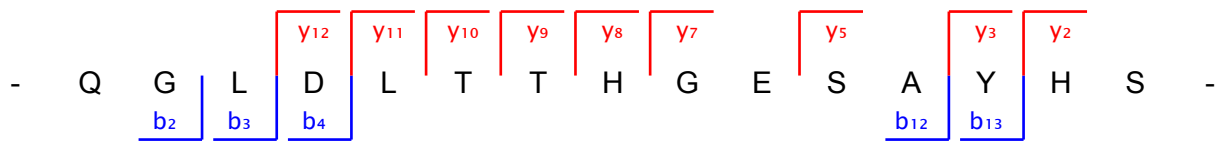

RCAP\_rcc03402 D5ASN5 Membrane protein, putative

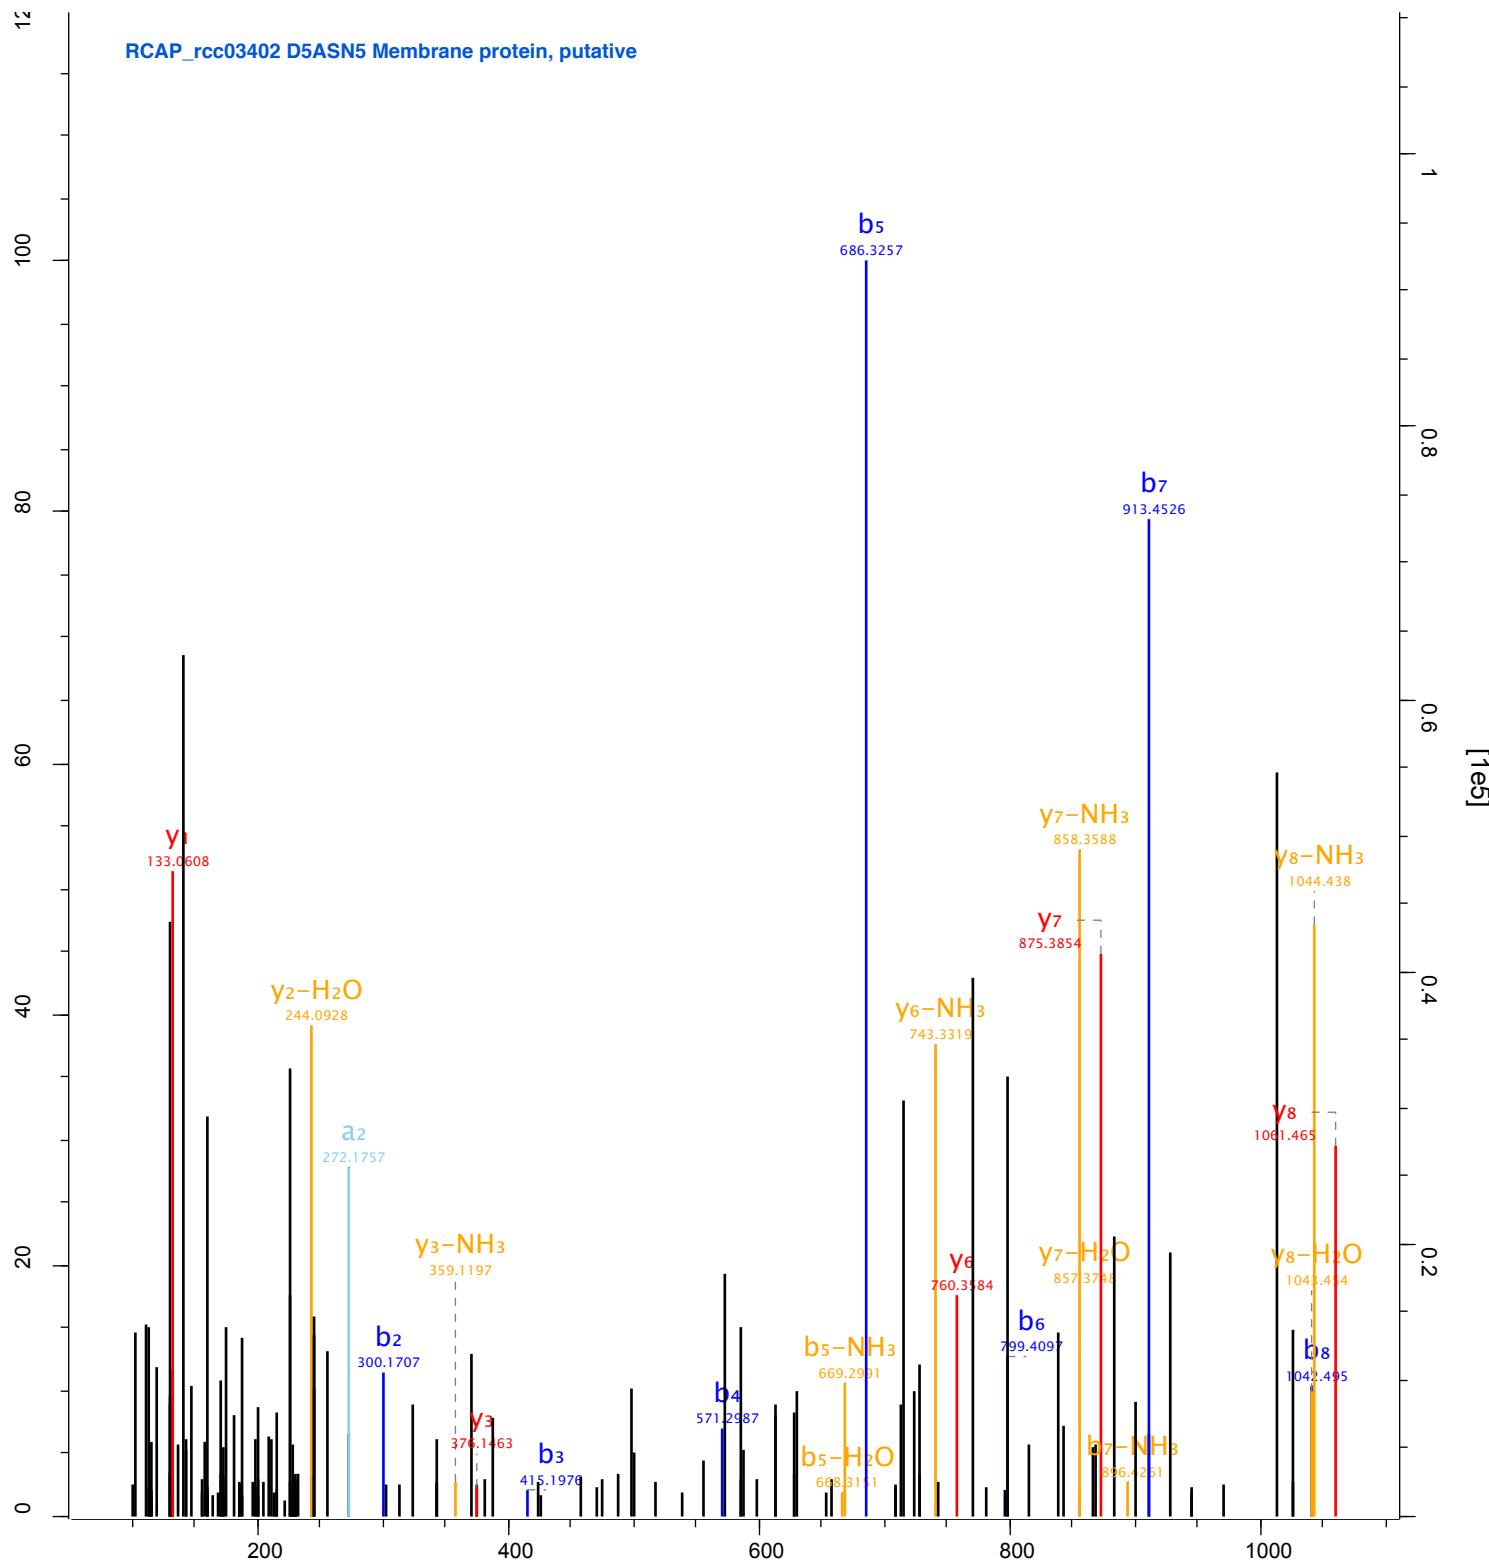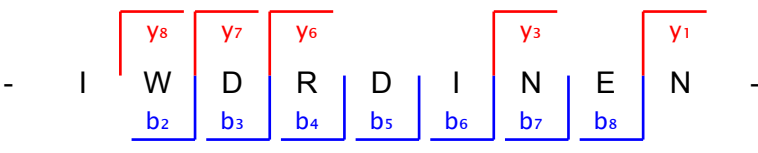

RCAP\_rcc03440 D5ASS3 Uncharacterized protein

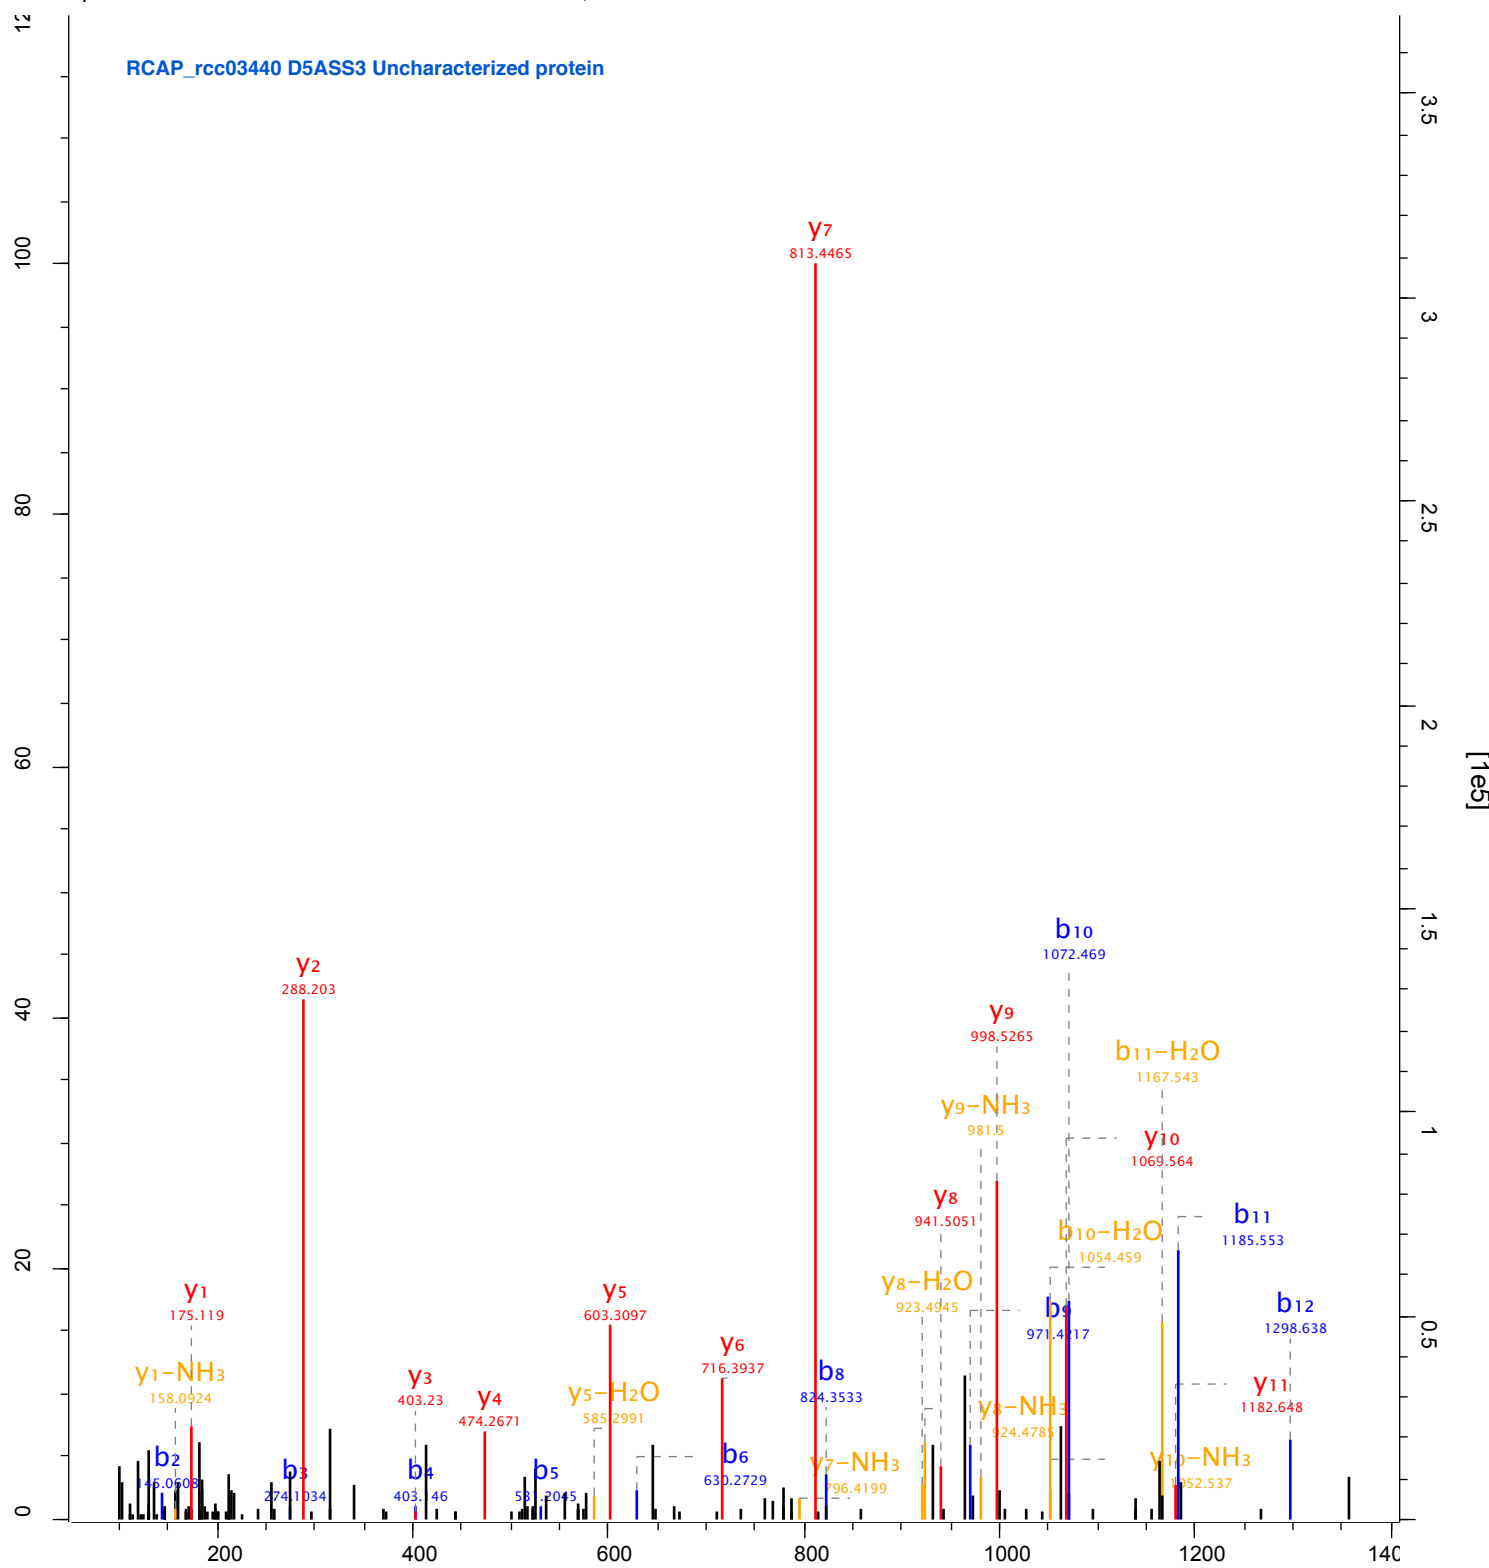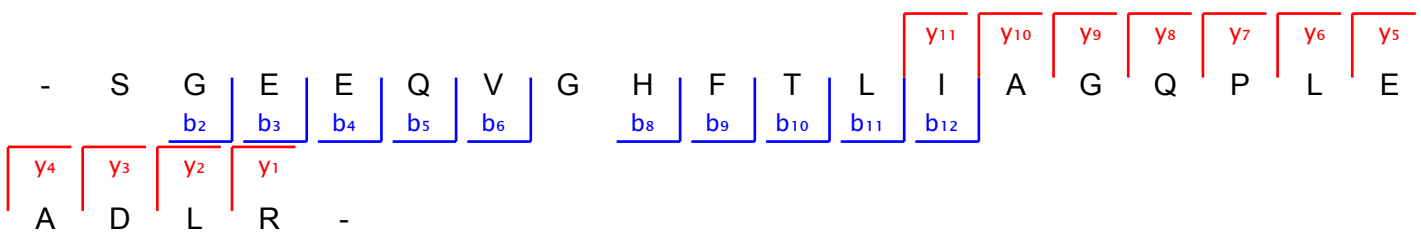

RCAP\_rcp00001 D5AVC4 Polar amino acid ABC transporter, permease protein

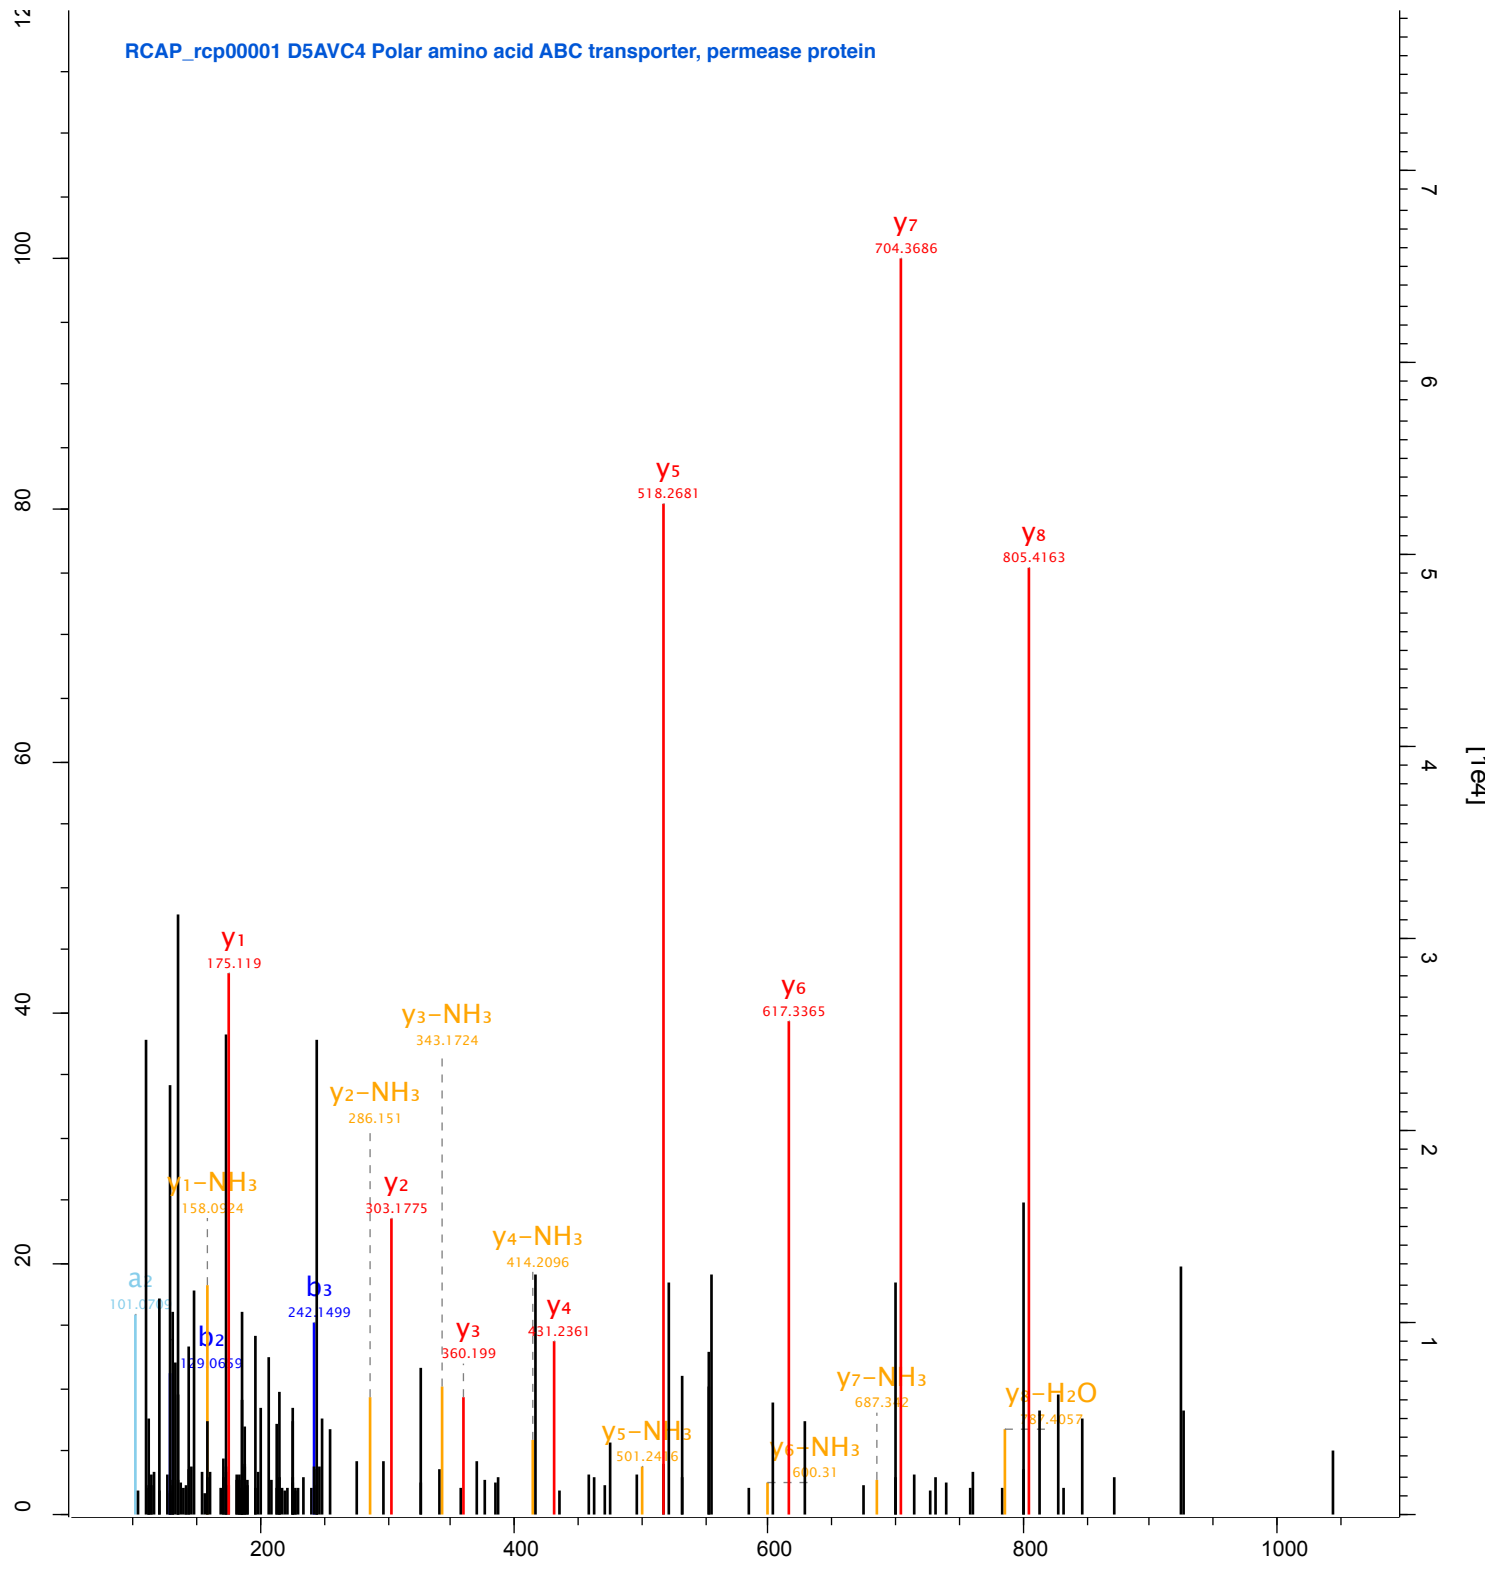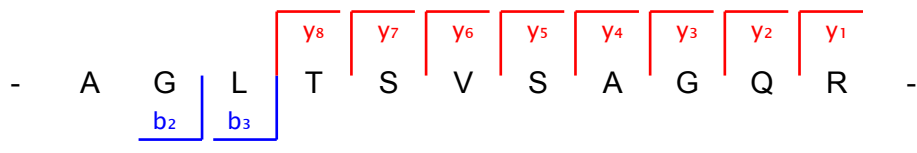



Raw File Scan Method Score m/z  
 MT1131-minusCu-03 44031 FTMS; HCD 86.13 928.79

RCAP\_rcp00141 D5AVR1 Uncharacterized protein

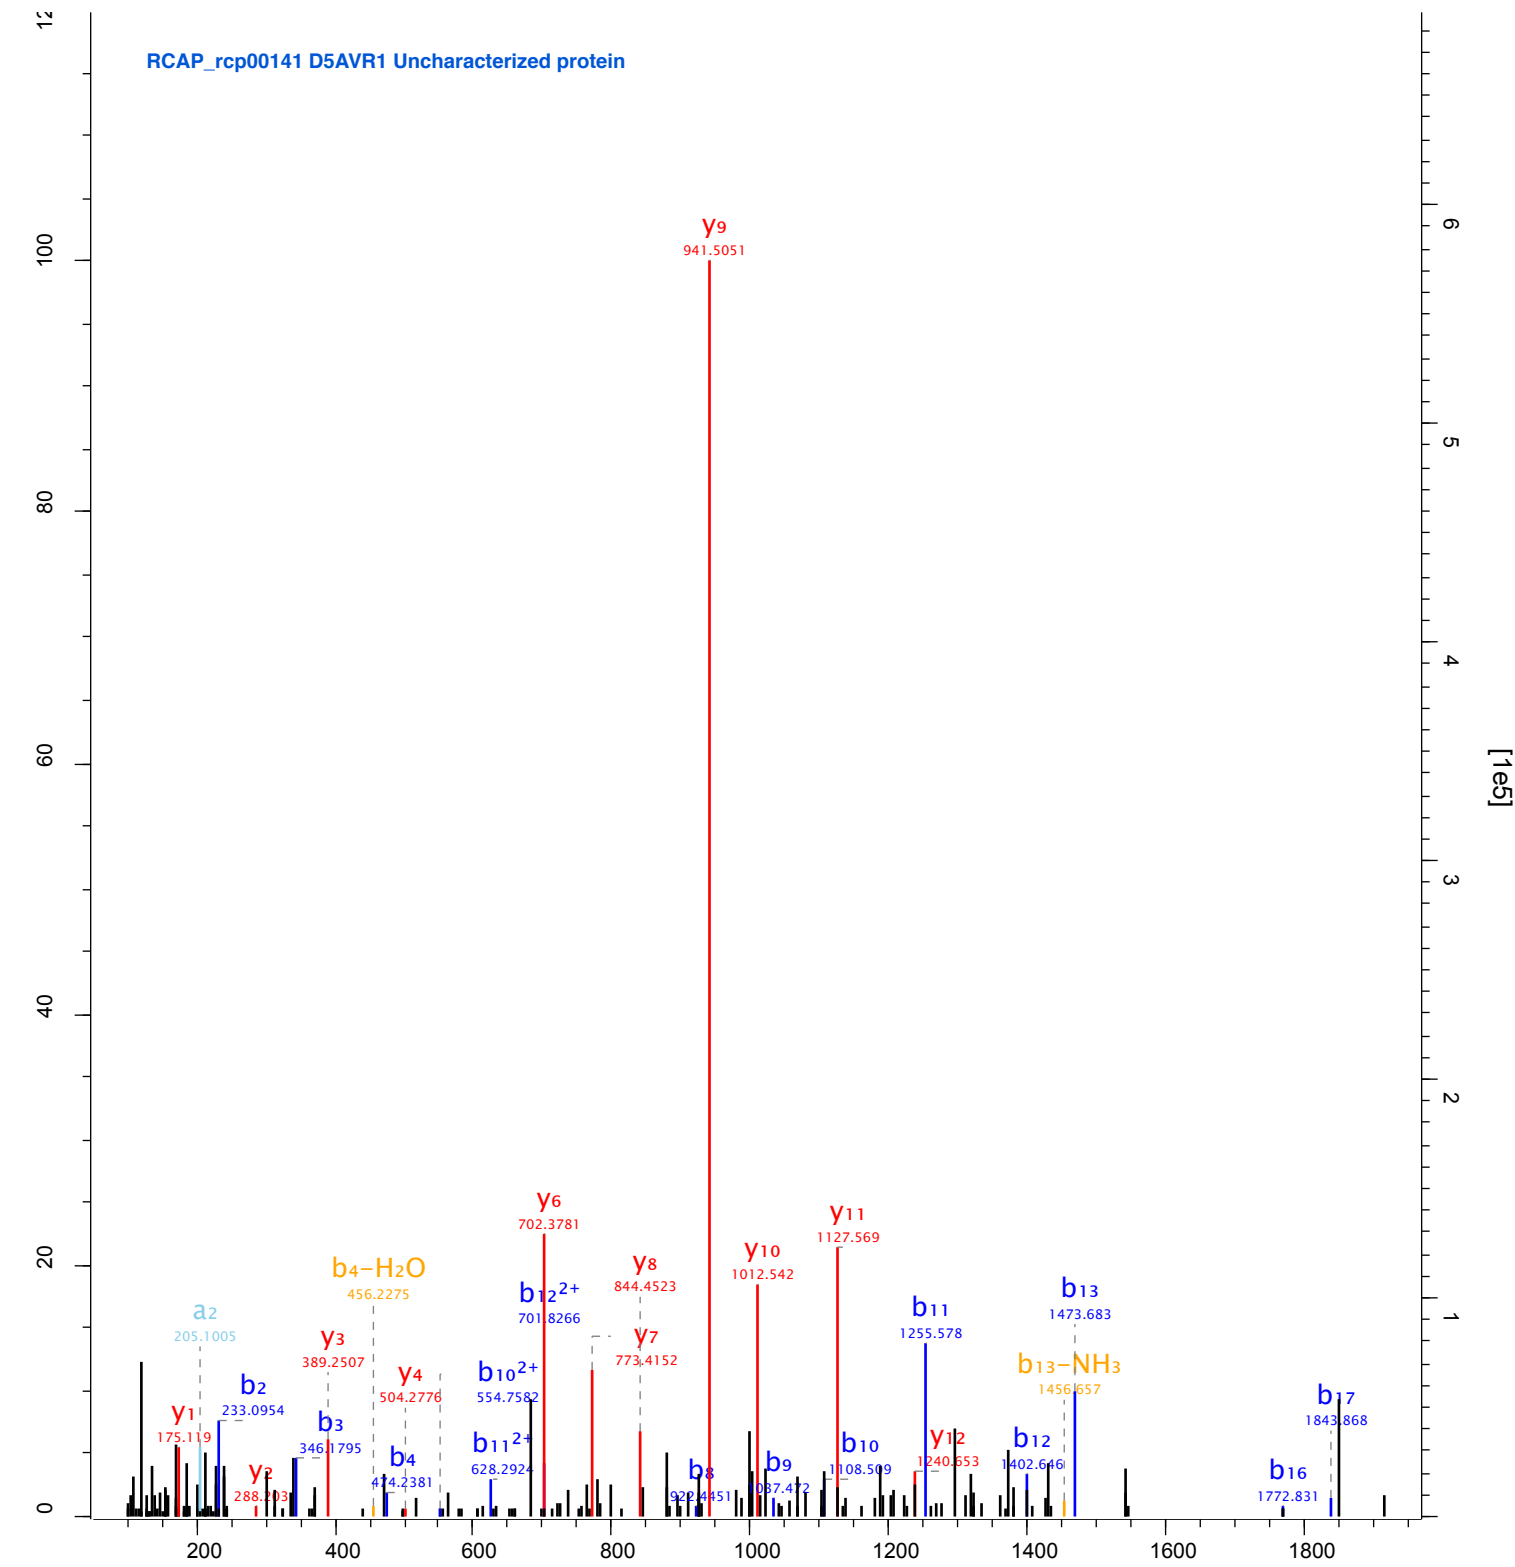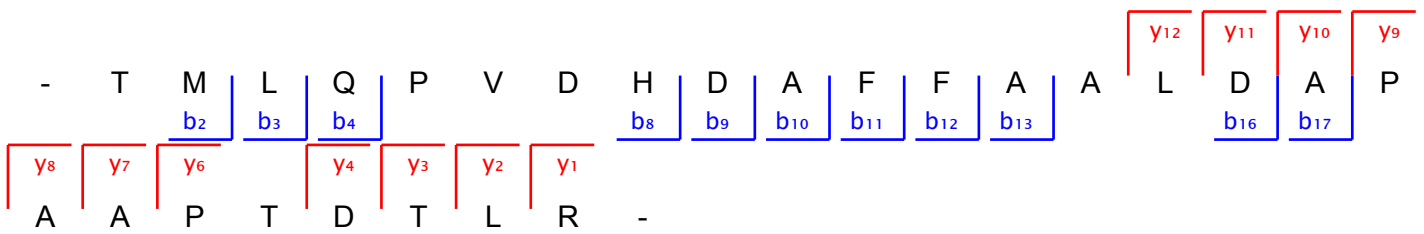

**Figure S5.** Total cellular metal contents of cells grown in Cu-sufficient control (-Cu), or + Cu (5  $\mu$ M), or +BCS (5 mM) medium, determined by ICP-MS as described earlier (8, 9) (note the logarithmic scale of y axis).

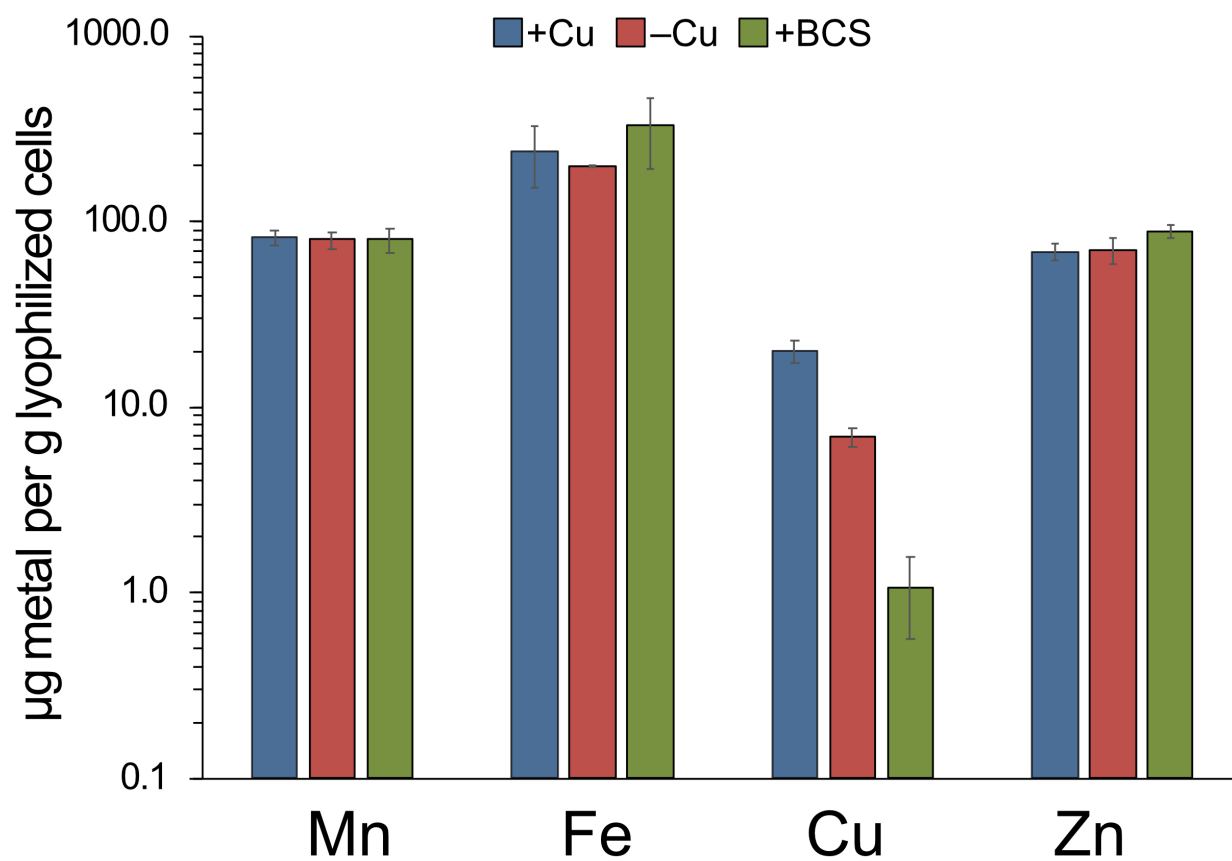

*Figure S5. Selamoglu et al.*
