# Supplementary material for: Comparative differential cuproproteomes of Rhodobacter capsulatus reveal novel copper homeostasis related proteins
Source: Royal Society of Chemistry journal article supplement (doi:10.1039/c9mt00314b), 2020-03-02
Supplement: c9mt00314b2.xlsx [file c9mt00314b2.xlsx]

## Sheet: R.capsulatus Proteins
Detected Proteins	Gene names (ordered locus )	Uniprot Entry	Uniprot Protein name	Gene name	Length	PsortB Database Final_Localization	TIGRFAM	TIGRFAM Role ID	TIGR Main Role	TIGR Sub Role	Gene ontology (biological process)	Gene ontology (molecular function)	Gene ontology (cellular component)	Interpro	Interpro descriptions	KEGG Classification
*	RCAP_rcc00001	D5AUY7	Chromosomal replication initiator protein DnaA	dnaA	457	Cytoplasmic	TIGR00362;	132	DNA metabolism	DNA replication, recombination, and repair	DNA replication initiation [GO:0006270]; regulation of DNA replication [GO:0006275]	ATP binding [GO:0005524]; DNA replication origin binding [GO:0003688]	cytoplasm [GO:0005737]	IPR003593;IPR001957;IPR020591;IPR018312;IPR013159;IPR013317;IPR024633;IPR027417;IPR010921	AAA+_ATPase;Chromosome_initiator_DnaA;Chromosome_initiator_DnaA-like;Chromosome_initiator_DnaA_CS;DnaA_C;DnaA_Hda;DnaA_N_dom;P-loop_NTPase;Trp_repressor/repl_initiator	ko02020;ko04112
*	RCAP_rcc00002	D5AUY8	Beta sliding clamp	dnaN	372	Cytoplasmic	TIGR00663;	132	DNA metabolism	DNA replication, recombination, and repair	DNA replication [GO:0006260]	3'-5' exonuclease activity [GO:0008408]; DNA binding [GO:0003677]; DNA-directed DNA polymerase activity [GO:0003887]	cytoplasm [GO:0005737]; DNA polymerase III complex [GO:0009360]	IPR001001;IPR022635;IPR022637;IPR022634	DNA_polIII_beta;DNA_polIII_beta_C;DNA_polIII_beta_cen;DNA_polIII_beta_N	ko00230;ko00240;ko03030;ko03430;ko03440
*	RCAP_rcc00003	D5AUY9	DNA replication and repair protein RecF	recF	352	Cytoplasmic					DNA repair [GO:0006281]; DNA replication [GO:0006260]; SOS response [GO:0009432]	ATP binding [GO:0005524]; single-stranded DNA binding [GO:0003697]	cytoplasm [GO:0005737]	IPR003593;IPR001238;IPR018078;IPR027417;IPR003395	AAA+_ATPase;DNA-binding_RecF;DNA-binding_RecF_CS;P-loop_NTPase;RecF/RecN/SMC_N	ko03440
*	RCAP_rcc00004	D5AUZ0	DNA gyrase subunit B (EC 5.99.1.3)	gyrB	816	Cytoplasmic	TIGR01059;	132	DNA metabolism	DNA replication, recombination, and repair	DNA-dependent DNA replication [GO:0006261]; DNA topological change [GO:0006265]	ATP binding [GO:0005524]; DNA binding [GO:0003677]; DNA topoisomerase type II (ATP-hydrolyzing) activity [GO:0003918]; metal ion binding [GO:0046872]	chromosome [GO:0005694]; cytoplasm [GO:0005737]	IPR002288;IPR011557;IPR003594;IPR020568;IPR014721;IPR001241;IPR013506;IPR013759;IPR013760;IPR018522;IPR006171	DNA_gyrase_B_C;GyrB;HATPase_C;Ribosomal_S5_D2-typ_fold;Ribosomal_S5_D2-typ_fold_subgr;Topo_IIA;Topo_IIA_bsu_dom2;Topo_IIA_cen_dom;Topo_IIA_like_dom;TopoIIA_CS;Toprim_domain
*	RCAP_rcc00005	D5AUZ1	Nitrilotriacetate monooxygenase, component B (EC 1.14.13.-)	ntaB	180	Unknown						FMN binding [GO:0010181]; monooxygenase activity [GO:0004497]		IPR002563;IPR012349	Flavin_Rdtase_FMN-bd;Split_barrel_FMN-bd
*	RCAP_rcc00006	D5AUZ2	Chemotaxis protein MotB	motB	283	Cytoplasmic Membrane							integral component of membrane [GO:0016021]	IPR025713;IPR006665	MotB_N_dom;OmpA/MotB_C	ko02030;ko02040
*	RCAP_rcc00007	D5AUZ3	Flagellar hook protein FlgE	flgE	452	Extracellular	TIGR03506;	188	Cellular processes	Chemotaxis and motility	bacterial-type flagellum-dependent cell motility [GO:0071973]		bacterial-type flagellum basal body [GO:0009425]	IPR011491;IPR001444;IPR020013;IPR010930	Falgellar_basal_body_FlaE;Flag_bb_rod_N;Flagellar_FlgE/F/G;Flg_bb/hook_C_dom	ko02040
*	RCAP_rcc00008	D5AKD1	Flagellar hook-associated protein FlgK	flgK	484	Extracellular	TIGR02492;	188	Cellular processes	Chemotaxis and motility	bacterial-type flagellum assembly [GO:0044780]; bacterial-type flagellum-dependent cell motility [GO:0071973]	structural molecule activity [GO:0005198]	bacterial-type flagellum hook [GO:0009424]	IPR001444;IPR002371;IPR010930	Flag_bb_rod_N;Flagellar_hook-assoc_FlgK;Flg_bb/hook_C_dom	ko02040
*	RCAP_rcc00009	D5AKD2	Flagellar hook-associated protein FlgL	flgL	338	Unknown					bacterial-type flagellum-dependent cell motility [GO:0071973]	structural molecule activity [GO:0005198]		IPR001029	Flagellin_D0/D1	ko02040
*	RCAP_rcc00010	D5AKD3	Flagellar P-ring protein (Basal body P-ring protein)	flgI	365	Periplasmic					bacterial-type flagellum-dependent cell motility [GO:0071973]	structural molecule activity [GO:0005198]	bacterial-type flagellum basal body, distal rod, P ring [GO:0009428]; outer membrane-bounded periplasmic space [GO:0030288]	IPR001782	Flag_FlgI	ko02040
*	RCAP_rcc00011	D5AKD4	Secretion protein, HlyD family	RCAP_rcc00011	315	Cytoplasmic Membrane								IPR006143	RND_pump_MFP
	RCAP_rcc00012	D5AKD5	ABC transporter, ATP-binding protein (EC 3.6.3.-)	RCAP_rcc00012	305	Cytoplasmic Membrane						ATPase activity [GO:0016887]; ATP binding [GO:0005524]		IPR003593;IPR003439;IPR017871;IPR027417	AAA+_ATPase;ABC_transporter-like;ABC_transporter_CS;P-loop_NTPase
*	RCAP_rcc00013	D5AKD6	Inner membrane transport permease	RCAP_rcc00013	378	Cytoplasmic Membrane					transmembrane transport [GO:0055085]		ATP-binding cassette (ABC) transporter complex [GO:0043190]	IPR000412	ABC_2_transport	ko02010
*	RCAP_rcc00014	D5AKD7	Xylose isomerase (EC 5.3.1.5)	xylA	433	Cytoplasmic	TIGR02630;	119	Energy metabolism	Sugars	D-xylose metabolic process [GO:0042732]	magnesium ion binding [GO:0000287]; xylose isomerase activity [GO:0009045]	cytoplasm [GO:0005737]	IPR013022;IPR013452;IPR001998	Xyl_isomerase-like_TIM-brl;Xylose_isom_bac;Xylose_isomerase	ko00040;ko00051
*	RCAP_rcc00015	D5AKD8	Xylulose kinase (Xylulokinase) (EC 2.7.1.17)	xylB	478	Cytoplasmic	TIGR01312;	119	Energy metabolism	Sugars	D-xylose metabolic process [GO:0042732]; xylulose metabolic process [GO:0005997]	ATP binding [GO:0005524]; xylulokinase activity [GO:0004856]		IPR000577;IPR018485;IPR018483;IPR018484;IPR006000	Carb_kinase_FGGY;Carb_kinase_FGGY_C;Carb_kinase_FGGY_CS;Carb_kinase_FGGY_N;Xylulokinase	ko00040
*	RCAP_rcc00016	D5AKD9	Xylose ABC transporter, ATP-binding protein XylG (EC 3.6.3.17)	xylG	253	Cytoplasmic Membrane						ATP binding [GO:0005524]; monosaccharide-transporting ATPase activity [GO:0015407]		IPR003593;IPR003439;IPR027417	AAA+_ATPase;ABC_transporter-like;P-loop_NTPase	ko02010
*	RCAP_rcc00017	D5AKE0	Xylose ABC transporter, permease protein XylH	xylH	429	Cytoplasmic Membrane						transmembrane transporter activity [GO:0022857]	integral component of membrane [GO:0016021]; plasma membrane [GO:0005886]	IPR001851	ABC_transp_permease	ko02010
*	RCAP_rcc00018	D5AKE1	Xylose ABC transporter, xylose-binding protein XylF	xylF	339	Periplasmic	TIGR02634;	144	Transport and binding proteins	Carbohydrates, organic alcohols, and acids	D-xylose transmembrane transport [GO:0015753]	monosaccharide binding [GO:0048029]		IPR028082;IPR025997;IPR013456	Peripla_BP_I;SBP_2_dom;XylF	ko02010
*	RCAP_rcc00019	D5AKE2	Xylose operon repressor (EC 2.7.1.-)	xylR	422	Cytoplasmic						transferase activity [GO:0016740]		IPR000600;IPR011991	ROK;WHTH_DNA-bd_dom
*	RCAP_rcc00020	D5AKE3	FG-GAP repeat domain protein	RCAP_rcc00020	495	Unknown								IPR027039;IPR011519	Crtac1;UnbV_ASPIC
*	RCAP_rcc00021	D5AKE4	Cytochrome c peroxidase (EC 1.11.1.5)	RCAP_rcc00021	445	Periplasmic						cytochrome-c peroxidase activity [GO:0004130]; electron transfer activity [GO:0009055]; heme binding [GO:0020037]; metal ion binding [GO:0046872]		IPR009056;IPR004852	Cyt_c-like_dom;Di-haem_cyt_c_peroxidsae
*	RCAP_rcc00022	D5AKE5	Oxidoreductase, aldo/keto reductase family	RCAP_rcc00022	342	Cytoplasmic								IPR001395;IPR023210	Aldo/ket_red;NADP_OxRdtase_dom
	RCAP_rcc00023	D5AKE6	Ribonuclease BN	RCAP_rcc00023	269	Cytoplasmic Membrane	TIGR00765;	157	Unknown function	General			integral component of membrane [GO:0016021]; plasma membrane [GO:0005886]	IPR017039	Virul_fac_BrkB
*	RCAP_rcc00024	D5AKE7	Glutaryl-CoA dehydrogenase (EC 1.3.8.6)	gcdH	402	Cytoplasmic						acyl-CoA dehydrogenase activity [GO:0003995]; flavin adenine dinucleotide binding [GO:0050660]; glutaryl-CoA hydrolase activity [GO:0044466]		IPR006089;IPR006091;IPR009075;IPR013786;IPR009100	Acyl-CoA_DH_CS;Acyl-CoA_Oxase/DH_cen-dom;AcylCo_DH/oxidase_C;AcylCoA_DH/ox_N;AcylCoA_DH/oxidase_NM_dom	ko00071;ko00310;ko00362;ko00380
*	RCAP_rcc00025	D5AKE8	Transcriptional regulator, LysR family	RCAP_rcc00025	296	Unknown						DNA binding [GO:0003677]; DNA-binding transcription factor activity [GO:0003700]		IPR005119;IPR000847;IPR011991	LysR_subst-bd;Tscrpt_reg_HTH_LysR;WHTH_DNA-bd_dom
*	RCAP_rcc00026	D5AKE9	Uncharacterized protein	RCAP_rcc00026	1166	Unknown								IPR007452	DUF490
*	RCAP_rcc00027	D5AKF0	Surface antigen	RCAP_rcc00027	604	Outer Membrane							outer membrane [GO:0019867]	IPR000184	Bac_surfAg_D15
*	RCAP_rcc00028	D5AKF1	Isopentenyl-diphosphate Delta-isomerase (IPP isomerase) (EC 5.3.3.2) (IPP:DMAPP isomerase) (Isopentenyl pyrophosphate isomerase)	idi	176	Cytoplasmic					chlorophyll biosynthetic process [GO:0015995]; dimethylallyl diphosphate biosynthetic process [GO:0050992]; isoprenoid biosynthetic process [GO:0008299]; photosynthesis [GO:0015979]	hydrolase activity [GO:0016787]; isopentenyl-diphosphate delta-isomerase activity [GO:0004452]; metal ion binding [GO:0046872]	cytoplasm [GO:0005737]	IPR011876;IPR000086;IPR015797	IsopentenylPP_isomerase_typ1;NUDIX_hydrolase_dom;NUDIX_hydrolase_dom-like	ko00900
*	RCAP_rcc00029	D5AKF2	Protein-export protein SecB	secB	164	Cytoplasmic	TIGR00809;	97	Protein fate	Protein and peptide secretion and trafficking	protein folding [GO:0006457]; protein tetramerization [GO:0051262]; protein transport [GO:0015031]	unfolded protein binding [GO:0051082]	cytoplasm [GO:0005737]	IPR003708	SecB	ko03060;ko03070
*	RCAP_rcc00030	D5AKF3	FxsA cytoplasmic membrane protein	fxsA	163	Cytoplasmic Membrane							integral component of membrane [GO:0016021]	IPR007313	FxsA
*	RCAP_rcc00031	D5AKF4	Import inner membrane translocase, subunit Tim44	RCAP_rcc00031	219	Unknown								IPR007379;IPR016985	Tim44-like_dom;UCP031890_Tim44-rel
*	RCAP_rcc00032	D5AKF5	Smr protein/MutS2	RCAP_rcc00032	199	Cytoplasmic								IPR002625	Smr/MutS2_C
*	RCAP_rcc00033	D5AKF6	Uncharacterized protein	RCAP_rcc00033	367	Unknown								IPR029058;IPR010297;IPR014586	AB_hydrolase;DUF900_hydrolase;UCP033909
*	RCAP_rcc00034	D5AKF7	ATP-dependent protease ATPase subunit HslU (Unfoldase HslU)	hslU	433	Cytoplasmic	TIGR00390;	95	Protein fate	Protein folding and stabilization	protein unfolding [GO:0043335]	ATPase activity [GO:0016887]; ATP binding [GO:0005524]; peptidase activity, acting on L-amino acid peptides [GO:0070011]	HslUV protease complex [GO:0009376]	IPR003593;IPR003959;IPR019489;IPR004491;IPR027417	AAA+_ATPase;ATPase_AAA_core;Clp_ATPase_C;HslU;P-loop_NTPase
*	RCAP_rcc00035	D5AKF8	ATP-dependent protease subunit HslV (EC 3.4.25.2)	hslV	185	Cytoplasmic	TIGR03692;	138	Protein fate	Degradation of proteins, peptides, and glycopeptides	proteolysis involved in cellular protein catabolic process [GO:0051603]	metal ion binding [GO:0046872]; threonine-type endopeptidase activity [GO:0004298]	HslUV protease complex [GO:0009376]; proteasome core complex [GO:0005839]	IPR022281;IPR029055;IPR001353;IPR023333	ATP-dep_Prtase_HsIV_su;Ntn_hydrolases_N;Proteasome_sua/b;Proteasome_suB-type
*	RCAP_rcc00036	D5AKF9	Thioredoxin	trxA1	106	Cytoplasmic	TIGR01068;	112	Energy metabolism	Electron transport	cell redox homeostasis [GO:0045454]; glycerol ether metabolic process [GO:0006662]	protein disulfide oxidoreductase activity [GO:0015035]	cell [GO:0005623]	IPR005746;IPR012336;IPR017937;IPR013766	Thioredoxin;Thioredoxin-like_fold;Thioredoxin_CS;Thioredoxin_domain
*	RCAP_rcc00037	D5AKG0	UvrD/REP helicase family protein (EC 3.6.1.-)	RCAP_rcc00037	1121	Unknown	TIGR02784;	132	DNA metabolism	DNA replication, recombination, and repair	DNA repair [GO:0006281]	ATP binding [GO:0005524]; ATP-dependent DNA helicase activity [GO:0004003]; DNA binding [GO:0003677]; exonuclease activity [GO:0004527]		IPR014151;IPR014017;IPR000212;IPR027417;IPR011335;IPR014016	DNA_helicas_ds-brk/repair_AddA;DNA_helicase_UvrD-like_C;DNA_helicase_UvrD/REP;P-loop_NTPase;Restrct_endonuc-II-like;UvrD-like_ATP-bd
*	RCAP_rcc00038	D5AKG1	Double-strand break repair protein AddB	addB	977	Cytoplasmic Membrane	TIGR02786;	132	DNA metabolism	DNA replication, recombination, and repair	DNA repair [GO:0006281]	ATP binding [GO:0005524]; exonuclease activity [GO:0004527]		IPR014153;IPR027417	Ds_break_AddB;P-loop_NTPase
*	RCAP_rcc00039	D5AKG2	Nucleotidyltransferase family protein (EC 2.7.7.-)	RCAP_rcc00039	230	Cytoplasmic						nucleotidyltransferase activity [GO:0016779]		IPR025877;IPR029044	MobA-like_NTP_Trfase_dom;Nucleotide-diphossugar_trans
*	RCAP_rcc00040	D5AKG3	Aminoglycoside phosphotransferase	RCAP_rcc00040	333	Cytoplasmic						transferase activity [GO:0016740]		IPR002575;IPR011009	Aminoglycoside_PTrfase;Kinase-like_dom
*	RCAP_rcc00041	D5AKG4	Uncharacterized protein	RCAP_rcc00041	158	Cytoplasmic	TIGR00150;	168	Protein synthesis	tRNA and rRNA base modification	tRNA threonylcarbamoyladenosine modification [GO:0002949]			IPR027417;IPR003442	P-loop_NTPase;T6A_TsaE
*	RCAP_rcc00042	D5AKG5	PAS/PAC sensor domain protein	RCAP_rcc00042	535	Cytoplasmic Membrane							integral component of membrane [GO:0016021]	IPR000014	PAS
*	RCAP_rcc00043	D5AKG6	Sensor histidine kinase RegB (EC 2.7.13.3)	regB	464	Cytoplasmic Membrane						ATP binding [GO:0005524]; phosphorelay sensor kinase activity [GO:0000155]	integral component of membrane [GO:0016021]	IPR003661;IPR003594;IPR004358;IPR005467;IPR009082	EnvZ-like_dim/P;HATPase_C;Sig_transdc_His_kin-like_C;Sig_transdc_His_kinase_core;Sig_transdc_His_kinase_dimeric
*	RCAP_rcc00044	Q52720	Protein SenC	senC	221	Unknown					cell redox homeostasis [GO:0045454]; photosynthesis [GO:0015979]	metal ion binding [GO:0046872]	cell [GO:0005623]	IPR003782;IPR012336	SCO1/SenC;Thioredoxin-like_fold
*	RCAP_rcc00045	D5AKG8	Photosynthetic apparatus regulatory protein RegA-1	regA1	184	Cytoplasmic					phosphorelay signal transduction system [GO:0000160]	DNA-binding transcription repressor activity [GO:0001217]; transcription regulatory region sequence-specific DNA binding [GO:0000976]	protein-DNA complex [GO:0032993]	IPR011006;IPR009057;IPR001789	CheY-like_superfamily;Homeodomain-like;Sig_transdc_resp-reg_receiver
*	RCAP_rcc00046	D5AKG9	Trans-acting regulatory protein HvrA	hvrA	102	Cytoplasmic					regulation of transcription, DNA-templated [GO:0006355]	DNA binding [GO:0003677]		IPR027444;IPR001801	H-NS_C_dom;Histone_HNS
*	RCAP_rcc00047	P42507	AhcY transcriptional activator HvrB	hvrB	292	Cytoplasmic						DNA binding [GO:0003677]; DNA-binding transcription factor activity [GO:0003700]		IPR005119;IPR000847;IPR011991	LysR_subst-bd;Tscrpt_reg_HTH_LysR;WHTH_DNA-bd_dom
*	RCAP_rcc00048	P42506	Uncharacterized protein RCAP_rcc00048 (ORF5)	RCAP_rcc00048	196	Cytoplasmic								IPR003607;IPR006674	HD/PDEase_dom;HD_domain
*	RCAP_rcc00049	P28183	Adenosylhomocysteinase (EC 3.3.1.1) (S-adenosyl-L-homocysteine hydrolase) (AdoHcyase)	ahcY	463	Cytoplasmic	TIGR00936;	109	Energy metabolism	Amino acids and amines	one-carbon metabolic process [GO:0006730]; S-adenosylhomocysteine catabolic process [GO:0019510]	adenosylhomocysteinase activity [GO:0004013]; NAD binding [GO:0051287]	cytoplasm [GO:0005737]	IPR000043;IPR015878;IPR016040;IPR020082	Adenosylhomocysteinase;Ado_hCys_hydrolase_NAD-bd;NAD(P)-bd_dom;S-Ado-L-homoCys_hydrolase_CS	ko00270
*	RCAP_rcc00050	D5AKH3	Uncharacterized protein	RCAP_rcc00050	113	Cytoplasmic								IPR021274;IPR023154	DUF2853;Jann4075-like_domain
*	RCAP_rcc00051	D5AKH4	Enoyl-CoA hydratase/isomerase family protein	RCAP_rcc00051	203	Cytoplasmic						isomerase activity [GO:0016853]		IPR029045;IPR001753;IPR018376	ClpP/crotonase-like_dom;Crotonase_core_superfam;Enoyl-CoA_hyd/isom_CS	ko00071;ko00280;ko00281;ko00310;ko00362;ko00380;ko00410;ko00627;ko00640;ko00650;ko00903;ko00930
*	RCAP_rcc00052	D5AKH5	Uncharacterized protein	RCAP_rcc00052	502	Unknown								IPR018666	DUF2125
*	RCAP_rcc00053	D5AKH6	Peptidase, U62 family, modulator of DNA gyrase (EC 3.4.-.-)	RCAP_rcc00053	448	Cytoplasmic						metallopeptidase activity [GO:0008237]		IPR002510	TldD/PmbA
*	RCAP_rcc00054	D5AKH7	Inositol monophosphatase family protein (EC 3.1.3.-)	RCAP_rcc00054	269	Cytoplasmic					phosphatidylinositol phosphorylation [GO:0046854]	hydrolase activity [GO:0016787]		IPR020583;IPR000760;IPR020550	Inositol_monoP_metal-BS;Inositol_monophosphatase;Inositol_monophosphatase_CS	ko00521;ko00562;ko04070
	RCAP_rcc00055	D5AKH8	Transglycosylase, Slt family	RCAP_rcc00055	262	Periplasmic								IPR023346;IPR008258	Lysozyme-like_dom;TGlycosylase-like_SLT
	RCAP_rcc00056	D5AKH9	Flagellar biosynthesis protein FlhA	flhA	695	Cytoplasmic Membrane	TIGR01398;	188	Cellular processes	Chemotaxis and motility	bacterial-type flagellum assembly [GO:0044780]; protein secretion [GO:0009306]		integral component of membrane [GO:0016021]; plasma membrane [GO:0005886]	IPR006301;IPR001712	FlhA;T3SS_FHIPEP	ko02040
	RCAP_rcc00057	D5AKI0	Flagellar biosynthetic protein FliR	fliR	258	Cytoplasmic Membrane					bacterial-type flagellum assembly [GO:0044780]; protein targeting [GO:0006605]		integral component of membrane [GO:0016021]	IPR002010	T3SS_IM_R	ko02040
	RCAP_rcc00058	D5AKI1	Flagellar biosynthetic protein FlhB	flhB	362	Cytoplasmic Membrane					protein secretion [GO:0009306]		integral component of membrane [GO:0016021]	IPR006135;IPR029025	T3SS_substrate_exporter;T3SS_substrate_exporter_C	ko02040
	RCAP_rcc00059	D5AKI2	Uncharacterized protein	RCAP_rcc00059	123	Unknown
*	RCAP_rcc00060	D5AKI3	Chromosome-partitioning protein ParB	parB	300	Cytoplasmic	TIGR00180;	89	Cell envelope	Biosynthesis and degradation of murein sacculus and peptidoglycan		DNA binding [GO:0003677]		IPR013741;IPR004437;IPR003115	KorB_domain;ParB/RepB/Spo0J;ParB/Sulfiredoxin_dom
*	RCAP_rcc00061	D5AKI4	Chromosome-partitioning protein ParA	parA	273	Cytoplasmic Membrane								IPR002586;IPR027417	CobQ/CobB/MinD/ParA_Nub-bd_dom;P-loop_NTPase
*	RCAP_rcc00062	D5AKI5	Ribosomal RNA small subunit methyltransferase G (EC 2.1.1.170) (16S rRNA 7-methylguanosine methyltransferase) (16S rRNA m7G methyltransferase)	gidB	196	Unknown	TIGR00138;	168	Protein synthesis	tRNA and rRNA base modification		rRNA (guanine-N7-)-methyltransferase activity [GO:0070043]	cytoplasm [GO:0005737]	IPR003682;IPR029063	rRNA_ssu_MeTfrase_G;SAM-dependent_MTases
*	RCAP_rcc00063	D5AKI6	tRNA uridine 5-carboxymethylaminomethyl modification enzyme MnmG (Glucose-inhibited division protein A)	mnmG	620	Cytoplasmic	TIGR00136;	168	Protein synthesis	tRNA and rRNA base modification	tRNA wobble uridine modification [GO:0002098]	flavin adenine dinucleotide binding [GO:0050660]	cytoplasm [GO:0005737]	IPR004416;IPR026904;IPR002218;IPR020595	GidA;GidA-assoc_3;GIDA-rel;GIDA-rel_CS
*	RCAP_rcc00064	D5AKI7	tRNA modification GTPase MnmE (EC 3.6.-.-)	mnmE	427	Cytoplasmic	TIGR00231;	157	Unknown function	General	tRNA modification [GO:0006400]	GTPase activity [GO:0003924]; GTP binding [GO:0005525]; metal ion binding [GO:0046872]	cytoplasm [GO:0005737]	IPR018948;IPR006073;IPR004520;IPR025867;IPR027368;IPR027417;IPR005225;IPR027266	GTP-bd_TrmE_N;GTP_binding_domain;GTPase_MnmE;GTPase_MnmE_C_dom;MnmE_dom2;P-loop_NTPase;Small_GTP-bd_dom;TrmE/GcvT_dom1
*	RCAP_rcc00065	D5AKI8	Transcription termination factor Rho (EC 3.6.4.-) (ATP-dependent helicase Rho)	rho	422	Cytoplasmic	TIGR00767;	165	Transcription	Transcription factors	DNA-templated transcription, termination [GO:0006353]	ATP binding [GO:0005524]; helicase activity [GO:0004386]; RNA binding [GO:0003723]; RNA-dependent ATPase activity [GO:0008186]		IPR003593;IPR000194;IPR011129;IPR012340;IPR027417;IPR011112;IPR011113;IPR004665	AAA+_ATPase;ATPase_F1/V1/A1_a/bsu_nucl-bd;Cold_shock_prot;NA-bd_OB-fold;P-loop_NTPase;Rho_N;Rho_RNA-bd;Term_rho	ko03018
*	RCAP_rcc00066	D5AKI9	UPF0093 family protein, transmembrane	RCAP_rcc00066	158	Cytoplasmic Membrane							integral component of membrane [GO:0016021]	IPR005265	UPF0093
*	RCAP_rcc00067	D5AKJ0	Maf-like protein RCAP_rcc00067	RCAP_rcc00067	199	Cytoplasmic						nucleoside-triphosphate diphosphatase activity [GO:0047429]	cytoplasm [GO:0005737]	IPR029001;IPR003697	ITPase-like_fam;Maf
*	RCAP_rcc00068	D5AKJ1	Shikimate dehydrogenase (NADP(+)) (SDH) (EC 1.1.1.25)	aroE	276	Cytoplasmic	TIGR00507;	70	Amino acid biosynthesis	Aromatic amino acid family	aromatic amino acid family biosynthetic process [GO:0009073]; chorismate biosynthetic process [GO:0009423]; shikimate metabolic process [GO:0019632]	NADP binding [GO:0050661]; shikimate 3-dehydrogenase (NADP+) activity [GO:0004764]		IPR016040;IPR011342;IPR013708;IPR022893;IPR006151	NAD(P)-bd_dom;Shikimate_DH;Shikimate_DH-bd_N;Shikimate_DH_fam;Shikm_DH/Glu-tRNA_Rdtase	ko00400
*	RCAP_rcc00069	D5AKJ2	Dephospho-CoA kinase (EC 2.7.1.24) (Dephosphocoenzyme A kinase)	coaE	198	Cytoplasmic	TIGR00152;	83	Biosynthesis of cofactors, prosthetic groups, and carriers	Pantothenate and coenzyme A	coenzyme A biosynthetic process [GO:0015937]	ATP binding [GO:0005524]; dephospho-CoA kinase activity [GO:0004140]	cytoplasm [GO:0005737]	IPR003593;IPR001977;IPR027417	AAA+_ATPase;Depp_CoAkinase;P-loop_NTPase	ko00770
*	RCAP_rcc00070	D5AKJ3	DNA polymerase III subunit epsilon (EC 2.7.7.7)	dnaQ	231	Cytoplasmic	TIGR00573;TIGR01406;	131	DNA metabolism	Degradation of DNA	DNA replication [GO:0006260]	DNA binding [GO:0003677]; DNA-directed DNA polymerase activity [GO:0003887]; exonuclease activity [GO:0004527]; metal ion binding [GO:0046872]		IPR006054;IPR006309;IPR006055;IPR013520;IPR012337	DnaQ;DnaQ_proteo;Exonuclease;Exonuclease_RNaseT/DNA_pol3;RNaseH-like_dom	ko00230;ko00240;ko03030;ko03430;ko03440
*	RCAP_rcc00071	D5AKJ4	Quinolinate synthase A (EC 2.5.1.72)	nadA	350	Cytoplasmic	TIGR00550;	163	Biosynthesis of cofactors, prosthetic groups, and carriers	Pyridine nucleotides	NAD biosynthetic process [GO:0009435]	4 iron, 4 sulfur cluster binding [GO:0051539]; lyase activity [GO:0016829]; metal ion binding [GO:0046872]; quinolinate synthetase A activity [GO:0008987]	cytoplasm [GO:0005737]	IPR003473;IPR023066	NadA;Quinolinate_synth_type2	ko00760
*	RCAP_rcc00072	D5AKJ5	L-aspartate oxidase (EC 1.4.3.16)	nadB	516	Cytoplasmic	TIGR00551;	163	Biosynthesis of cofactors, prosthetic groups, and carriers	Pyridine nucleotides	NAD biosynthetic process [GO:0009435]	L-aspartate:fumarate oxidoreductase activity [GO:0044318]; L-aspartate oxidase activity [GO:0008734]	cytoplasm [GO:0005737]	IPR003953;IPR015939;IPR005288;IPR027477	FAD_bind_dom;Fum_Rdtase/Succ_DH_flav-like_C;NadB;Succ_DH/fumarate_Rdtase_cat	ko00250;ko00760
*	RCAP_rcc00073	D5AKJ6	Nicotinate-nucleotide diphosphorylase (Carboxylating) (EC 2.4.2.19)	nadC	280	Cytoplasmic	TIGR00078;	163	Biosynthesis of cofactors, prosthetic groups, and carriers	Pyridine nucleotides	NAD biosynthetic process [GO:0009435]	nicotinate-nucleotide diphosphorylase (carboxylating) activity [GO:0004514]		IPR013785;IPR004393;IPR027277;IPR002638;IPR022412	Aldolase_TIM;NadC;NadC/ModD;Quinolinate_PRibosylTrfase_C;Quinolinate_PRibosylTrfase_N	ko00760
*	RCAP_rcc00074	D5AKJ7	RNA pyrophosphohydrolase (EC 3.6.1.-) ((Di)nucleoside polyphosphate hydrolase)	rppH	162	Cytoplasmic						hydrolase activity, acting on acid anhydrides, in phosphorus-containing anhydrides [GO:0016818]		IPR020476;IPR020084;IPR000086;IPR015797;IPR022927	Nudix_hydrolase;NUDIX_hydrolase_CS;NUDIX_hydrolase_dom;NUDIX_hydrolase_dom-like;RppH	ko03018
*	RCAP_rcc00075	D5AKJ8	C-terminal processing peptidase (EC 3.4.21.102)	ctpA	454	Cytoplasmic Membrane	TIGR00225;	138	Protein fate	Degradation of proteins, peptides, and glycopeptides		serine-type peptidase activity [GO:0008236]		IPR029045;IPR001478;IPR004447;IPR005151	ClpP/crotonase-like_dom;PDZ;Peptidase_S41A;Tail-specific_protease
*	RCAP_rcc00076	D5AKJ9	Peptidase, M23B subfamily (EC 3.4.24.-)	RCAP_rcc00076	381	Unknown						hydrolase activity [GO:0016787]		IPR011055;IPR016047	Dup_hybrid_motif;Peptidase_M23
*	RCAP_rcc00077	D5AKK0	2,3-bisphosphoglycerate-independent phosphoglycerate mutase (BPG-independent PGAM) (Phosphoglyceromutase) (iPGM) (EC 5.4.2.12)	gpmI	506	Cytoplasmic	TIGR01307;	116	Energy metabolism	Glycolysis/gluconeogenesis	glucose catabolic process [GO:0006007]; glycolytic process [GO:0006096]	2,3-bisphosphoglycerate-independent phosphoglycerate mutase activity [GO:0046537]; manganese ion binding [GO:0030145]	cytoplasm [GO:0005737]	IPR017849;IPR017850;IPR011258;IPR006124;IPR005995	Alkaline_Pase-like_a/b/a;Alkaline_phosphatase_core;BPG-indep_PGM_N;Metalloenzyme;Pgm_bpd_ind	ko00010;ko00680
*	RCAP_rcc00078	D5AKK1	Ribosomal RNA large subunit methyltransferase H (EC 2.1.1.177) (23S rRNA (pseudouridine1915-N3)-methyltransferase) (23S rRNA m3Psi1915 methyltransferase) (rRNA (pseudouridine-N3-)-methyltransferase RlmH)	rlmH	155	Cytoplasmic						rRNA (pseudouridine-N3-)-methyltransferase activity [GO:0070038]	cytoplasm [GO:0005737]	IPR029028;IPR003742;IPR029026	Alpha/beta_knot_MTases;SPOUT_MeTrfase;tRNA_m1G_MTases_N
*	RCAP_rcc00079	D5AKK2	Ribosomal silencing factor RsfS	rsfS	158	Cytoplasmic	TIGR00090;	169	Protein synthesis	Translation factors	mature ribosome assembly [GO:0042256]; negative regulation of ribosome biogenesis [GO:0090071]; negative regulation of translation [GO:0017148]		cytoplasm [GO:0005737]	IPR004394;IPR025656	Iojap/RsfS/C7orf30;Oligomer_dom
	RCAP_rcc00080	D5AKK3	Uncharacterized protein	RCAP_rcc00080	34	Unknown
*	RCAP_rcc00081	D5AKK4	3-isopropylmalate dehydratase large subunit (EC 4.2.1.33) (Alpha-IPM isomerase) (IPMI) (Isopropylmalate isomerase)	leuC	468	Cytoplasmic	TIGR00170;	74	Amino acid biosynthesis	Pyruvate family	leucine biosynthetic process [GO:0009098]	3-isopropylmalate dehydratase activity [GO:0003861]; 4 iron, 4 sulfur cluster binding [GO:0051539]; metal ion binding [GO:0046872]		IPR004430;IPR015931;IPR015937;IPR001030;IPR015932;IPR018136	3-IsopropMal_deHydase_lsu;Acnase/IPM_dHydase_lsu_aba_1/3;Acoase/IPM_deHydtase;Acoase/IPM_deHydtase_lsu_aba;Aconitase/IPMdHydase_lsu_aba_2;Aconitase_4Fe-4S_BS	ko00290;ko00660
*	RCAP_rcc00082	D5AKK5	3-isopropylmalate dehydratase small subunit (EC 4.2.1.33) (Alpha-IPM isomerase) (IPMI) (Isopropylmalate isomerase)	leuD	201	Cytoplasmic	TIGR00171;	74	Amino acid biosynthesis	Pyruvate family	leucine biosynthetic process [GO:0009098]	3-isopropylmalate dehydratase activity [GO:0003861]	3-isopropylmalate dehydratase complex [GO:0009316]	IPR004431;IPR015937;IPR015928;IPR000573	3-IsopropMal_deHydase_ssu;Acoase/IPM_deHydtase;Aconitase/3IPM_dehydase_swvl;AconitaseA/IPMdHydase_ssu_swvl	ko00290;ko00660
	RCAP_rcc00083	D5AKK6	Membrane protein, putative	RCAP_rcc00083	275	Cytoplasmic Membrane							integral component of membrane [GO:0016021]
	RCAP_rcc00084	D5AKK7	Uncharacterized protein	RCAP_rcc00084	327	Unknown								IPR005135	Endo/exonuclease/phosphatase
*	RCAP_rcc00085	D5AKK8	3-isopropylmalate dehydrogenase (EC 1.1.1.85) (3-IPM-DH) (Beta-IPM dehydrogenase) (IMDH)	leuB	369	Cytoplasmic	TIGR00169;	74	Amino acid biosynthesis	Pyruvate family	leucine biosynthetic process [GO:0009098]	3-isopropylmalate dehydrogenase activity [GO:0003862]; magnesium ion binding [GO:0000287]; NAD binding [GO:0051287]	cytoplasm [GO:0005737]	IPR019818;IPR001804;IPR024084;IPR004429	IsoCit/isopropylmalate_DH_CS;Isocitrate/isopropylmalate_DH;IsoPropMal-DH-like_dom;Isopropylmalate_DH	ko00290
	RCAP_rcc00086	D5AKK9	Uncharacterized protein	RCAP_rcc00086	322	Cytoplasmic Membrane							integral component of membrane [GO:0016021]	IPR000620	EamA_dom
	RCAP_rcc00087	D5AKL0	Uncharacterized protein	RCAP_rcc00087	153	Unknown
*	RCAP_rcc00088	D5AKL1	Uncharacterized protein	RCAP_rcc00088	92	Cytoplasmic					regulation of transcription, DNA-templated [GO:0006355]	DNA binding [GO:0003677]; metal ion binding [GO:0046872]		IPR003735	Metal_Tscrpt_repr
*	RCAP_rcc00089	D5AKL2	Cation diffusion facilitator family transporter	RCAP_rcc00089	318	Cytoplasmic Membrane	TIGR01297;	145	Transport and binding proteins	Cations and iron carrying compounds		cation transmembrane transporter activity [GO:0008324]	integral component of membrane [GO:0016021]	IPR002524;IPR027469	Cation_efflux;Cation_efflux_TMD
	RCAP_rcc00090	D5AKL3	Ferrous iron transport protein A-1	feoA1	89	Unknown						transition metal ion binding [GO:0046914]		IPR007167;IPR008988	Fe-transptr_FeoA;Transcriptional_repressor_C
*	RCAP_rcc00091	D5AKL4	Ferrous iron transport protein A-2	feoA2	82	Unknown						transition metal ion binding [GO:0046914]		IPR007167;IPR008988	Fe-transptr_FeoA;Transcriptional_repressor_C
*	RCAP_rcc00092	D5AKL5	Ferrous iron transport protein B	feoB1	779	Cytoplasmic Membrane	TIGR00437;TIGR00231;	145	Transport and binding proteins	Cations and iron carrying compounds	iron ion homeostasis [GO:0055072]	ferrous iron transmembrane transporter activity [GO:0015093]; GTP binding [GO:0005525]	integral component of membrane [GO:0016021]; plasma membrane [GO:0005886]	IPR003373;IPR011640;IPR011619;IPR030389;IPR006073;IPR011642;IPR027417;IPR005225	Fe2_transport_prot-B;Fe2_transport_prot_B_C;Fe2_transport_prot_B_N;G_FEOB_dom;GTP_binding_domain;Nucleoside_recog_Gate;P-loop_NTPase;Small_GTP-bd_dom
	RCAP_rcc00093	D5AKL6	Uncharacterized protein	RCAP_rcc00093	78	Unknown								IPR015102	Tscrpt_reg_HTH_FeoC
	RCAP_rcc00094	D5AKL7	Hemin import ATP-binding protein HmuV (EC 3.6.3.-)	hmuV	259	Cytoplasmic Membrane						ATP binding [GO:0005524]; heme-transporting ATPase activity [GO:0015439]	plasma membrane [GO:0005886]	IPR003593;IPR003439;IPR015863;IPR027417	AAA+_ATPase;ABC_transporter-like;ABC_transpr_HmuV;P-loop_NTPase	ko02010
	RCAP_rcc00095	D5AKL8	Hemin ABC transporter, permease protein	hmuU	354	Cytoplasmic Membrane						transporter activity [GO:0005215]	integral component of membrane [GO:0016021]; plasma membrane [GO:0005886]	IPR029022;IPR000522	ABC_BtuC-like;ABC_transptr_permAse	ko02010
*	RCAP_rcc00096	D5AKL9	Hemin ABC transporter, periplasmic hemin-binding protein	hmuT	281	Periplasmic								IPR002491	ABC_transptr_periplasmic_BD	ko02010
	RCAP_rcc00097	D5AKM0	Hemin transport protein HmuS	hmuS	354	Cytoplasmic					iron ion transport [GO:0006826]			IPR007845	HemS/ChuX_dom
*	RCAP_rcc00098	D5AKM1	TonB-dependent hemin receptor	hmuR	667	Outer Membrane	TIGR01785;	145	Transport and binding proteins	Cations and iron carrying compounds		heme transporter activity [GO:0015232]	outer membrane [GO:0019867]	IPR012910;IPR000531;IPR011276;IPR010917	Plug;TonB-dep_rcpt_b-brl;TonB_haem/Hb_rcpt;TonB_rcpt_CS
*	RCAP_rcc00099	D5AKM2	ABC transporter, ATP-binding protein (EC 3.6.3.-)	RCAP_rcc00099	202	Cytoplasmic Membrane						ATPase activity [GO:0016887]; ATP binding [GO:0005524]		IPR003593;IPR003439;IPR017871;IPR027417	AAA+_ATPase;ABC_transporter-like;ABC_transporter_CS;P-loop_NTPase	ko02010
*	RCAP_rcc00100	D5AKM3	ABC transporter, ATP-binding protein (EC 3.6.3.-)	RCAP_rcc00100	245	Cytoplasmic Membrane						ATPase activity [GO:0016887]; ATP binding [GO:0005524]		IPR003593;IPR003439;IPR017871;IPR027417	AAA+_ATPase;ABC_transporter-like;ABC_transporter_CS;P-loop_NTPase	ko02010
	RCAP_rcc00101	D5AKM4	ABC transporter, permease protein	RCAP_rcc00101	284	Cytoplasmic Membrane					transmembrane transport [GO:0055085]		integral component of membrane [GO:0016021]; plasma membrane [GO:0005886]	IPR000515	MetI-like	ko02010
	RCAP_rcc00102	D5AKM5	ABC transporter, permease protein	RCAP_rcc00102	333	Cytoplasmic Membrane					transmembrane transport [GO:0055085]		integral component of membrane [GO:0016021]; plasma membrane [GO:0005886]	IPR000515	MetI-like	ko02010
*	RCAP_rcc00103	D5AKM6	ABC transporter, periplasmic substrate-binding protein	RCAP_rcc00103	526	Periplasmic					transmembrane transport [GO:0055085]		ATP-binding cassette (ABC) transporter complex [GO:0043190]	IPR000914	SBP_5_dom	ko02010
	RCAP_rcc00104	D5AKM7	Uncharacterized protein	RCAP_rcc00104	128	Cytoplasmic Membrane							integral component of membrane [GO:0016021]	IPR007401	DUF454
	RCAP_rcc00105	D5AKM8	Ferrichrome ABC transporter, ATP-binding protein FhuC-1 (EC 3.6.3.34)	fhuC1	254	Cytoplasmic Membrane						ATP binding [GO:0005524]; ferric dicitrate transporter activity [GO:0102026]; iron-chelate-transporting ATPase activity [GO:0015623]	cell [GO:0005623]	IPR003593;IPR003439;IPR027417	AAA+_ATPase;ABC_transporter-like;P-loop_NTPase	ko02010
	RCAP_rcc00106	D5AKM9	Ferrichrome ABC transporter, permease protein FhuB-1	fhuB1	315	Cytoplasmic Membrane						transporter activity [GO:0005215]	integral component of membrane [GO:0016021]; plasma membrane [GO:0005886]	IPR029022;IPR000522	ABC_BtuC-like;ABC_transptr_permAse	ko02010
	RCAP_rcc00107	D5AKN0	Ferrichrome ABC transporter, permease protein FhuB-2	fhuB2	312	Cytoplasmic Membrane						transporter activity [GO:0005215]	integral component of membrane [GO:0016021]; plasma membrane [GO:0005886]	IPR029022;IPR000522	ABC_BtuC-like;ABC_transptr_permAse	ko02010
*	RCAP_rcc00108	D5AKN1	Ferrichrome ABC transporter, periplasmic ferrichrome-binding protein FhuD-1	fhuD1	294	Periplasmic					iron ion transport [GO:0006826]			IPR002491	ABC_transptr_periplasmic_BD	ko02010
*	RCAP_rcc00109	D5AKN2	Uncharacterized protein	RCAP_rcc00109	102	Unknown								IPR014543	UCP028291
	RCAP_rcc00110	D5AKN3	Putative esterase	RCAP_rcc00110	273	Unknown								IPR029058;IPR000801	AB_hydrolase;Esterase_put
*	RCAP_rcc00111	D5AKN4	Outer membrane ferric siderophore receptor	fhuE	702	Outer Membrane	TIGR01783;	145	Transport and binding proteins	Cations and iron carrying compounds	siderophore transport [GO:0015891]	iron ion binding [GO:0005506]; signaling receptor activity [GO:0038023]	cell outer membrane [GO:0009279]	IPR012910;IPR000531;IPR010105	Plug;TonB-dep_rcpt_b-brl;TonB_sidphr_rcpt
	RCAP_rcc00112	D5AKN5	Transcriptional regulator, AraC family	RCAP_rcc00112	308	Cytoplasmic						DNA-binding transcription factor activity [GO:0003700]; sequence-specific DNA binding [GO:0043565]		IPR009057;IPR018060;IPR018062	Homeodomain-like;HTH_AraC;HTH_AraC-typ_CS
*	RCAP_rcc00113	D5AKN6	Ribonuclease D-1 (EC 3.1.13.5)	rnd1	204	Cytoplasmic						3'-5' exonuclease activity [GO:0008408]; nucleic acid binding [GO:0003676]; ribonuclease D activity [GO:0033890]		IPR002562;IPR012337	3'-5'_exonuclease_dom;RNaseH-like_dom
*	RCAP_rcc00114	D5AKN7	Arabinose 5-phosphate isomerase (EC 5.3.1.13)	kdsD	318	Cytoplasmic	TIGR00393;	119	Energy metabolism	Sugars	carbohydrate derivative metabolic process [GO:1901135]; carbohydrate metabolic process [GO:0005975]	arabinose-5-phosphate isomerase activity [GO:0019146]; carbohydrate derivative binding [GO:0097367]; metal ion binding [GO:0046872]		IPR000644;IPR004800;IPR001347	CBS_dom;KdsD/KpsF-type;SIS
*	RCAP_rcc00115	D5AKN8	Uncharacterized protein	RCAP_rcc00115	199	Unknown							integral component of membrane [GO:0016021]
*	RCAP_rcc00116	D5AKN9	OstA family protein	RCAP_rcc00116	161	Unknown	TIGR03002;	90	Cell envelope	Biosynthesis and degradation of surface polysaccharides and lipopolysaccharides	lipopolysaccharide transport [GO:0015920]	lipopolysaccharide binding [GO:0001530]	periplasmic space [GO:0042597]	IPR014340;IPR005653	LptA;OstA-like_N
*	RCAP_rcc00117	D5AKP0	ABC transporter, ATP-binding protein (EC 3.6.3.-)	RCAP_rcc00117	252	Cytoplasmic	TIGR04406;	90	Cell envelope	Biosynthesis and degradation of surface polysaccharides and lipopolysaccharides	transmembrane transport [GO:0055085]	ATPase activity [GO:0016887]; ATP binding [GO:0005524]	ATP-binding cassette (ABC) transporter complex [GO:0043190]	IPR003593;IPR003439;IPR017871;IPR030921;IPR027417	AAA+_ATPase;ABC_transporter-like;ABC_transporter_CS;LPS_export_lptB;P-loop_NTPase	ko02010
*	RCAP_rcc00118	D5AKP1	Ribosome hibernation promoting factor (HPF)	RCAP_rcc00118	191	Cytoplasmic	TIGR00741;	169	Protein synthesis	Translation factors	primary metabolic process [GO:0044238]; regulation of translation [GO:0006417]		ribosome [GO:0005840]	IPR003489	Ribosomal_S30Ae/sigma54_mod
*	RCAP_rcc00119	D5AKP2	Nitrogen regulatory protein (EC 2.7.1.69)	ptsN	155	Cytoplasmic						D-glucosamine PTS permease activity [GO:0103111]; kinase activity [GO:0016301]; protein-N(PI)-phosphohistidine-sugar phosphotransferase activity [GO:0008982]		IPR016152;IPR002178	PTrfase/Anion_transptr;PTS_EIIA_type-2_dom	ko02060
*	RCAP_rcc00120	D5AKP3	Uncharacterized protein	RCAP_rcc00120	467	Periplasmic								IPR027417	P-loop_NTPase
*	RCAP_rcc00121	D5AKP4	Glycosyl transferase, family 14 (EC 2.4.1.-)	RCAP_rcc00121	562	Cytoplasmic Membrane						acetylglucosaminyltransferase activity [GO:0008375]	membrane [GO:0016020]	IPR003406	Glyco_trans_14
*	RCAP_rcc00122	D5AKP5	Uncharacterized protein	RCAP_rcc00122	336	Cytoplasmic
*	RCAP_rcc00123	D5AKP6	Uncharacterized protein	RCAP_rcc00123	340	Unknown								IPR029044	Nucleotide-diphossugar_trans
*	RCAP_rcc00124	D5AKP7	UDP-glucose 4-epimerase (EC 5.1.3.2)	galE	328	Cytoplasmic	TIGR01179;	119	Energy metabolism	Sugars	galactose metabolic process [GO:0006012]	coenzyme binding [GO:0050662]; UDP-glucose 4-epimerase activity [GO:0003978]		IPR025308;IPR001509;IPR005886;IPR016040	Epimerase_C;Epimerase_deHydtase_N;GalE;NAD(P)-bd_dom	ko00052;ko00520
*	RCAP_rcc00125	D5AKP8	UTP--glucose-1-phosphate uridylyltransferase (EC 2.7.7.9) (UDP-glucose pyrophosphorylase)	galU	297	Cytoplasmic	TIGR01099;	90	Cell envelope	Biosynthesis and degradation of surface polysaccharides and lipopolysaccharides	biosynthetic process [GO:0009058]; UDP-glucose metabolic process [GO:0006011]	UTP:glucose-1-phosphate uridylyltransferase activity [GO:0003983]		IPR005771;IPR005835;IPR029044	GalU_uridylyltTrfase_bac/arc;NTP_transferase;Nucleotide-diphossugar_trans	ko00040;ko00052;ko00500;ko00520
*	RCAP_rcc00126	D5AKP9	3-deoxy-manno-octulosonate cytidylyltransferase (EC 2.7.7.38)	kdsB	266	Cytoplasmic						3-deoxy-manno-octulosonate cytidylyltransferase activity [GO:0008690]		IPR003329;IPR004528;IPR029044	Cytidylyl_trans;KdsB;Nucleotide-diphossugar_trans	ko00540
*	RCAP_rcc00127	D5AKQ0	3'(2'),5'-bisphosphate nucleotidase CysQ (EC 3.1.3.7) (3'(2'),5-bisphosphonucleoside 3'(2')-phosphohydrolase) (3'-phosphoadenosine 5'-phosphate phosphatase) (PAP phosphatase)	cysQ	264	Cytoplasmic	TIGR01331;	106	Central intermediary metabolism	Sulfur metabolism	phosphatidylinositol phosphorylation [GO:0046854]; sulfur compound metabolic process [GO:0006790]	3'(2'),5'-bisphosphate nucleotidase activity [GO:0008441]; magnesium ion binding [GO:0000287]	plasma membrane [GO:0005886]	IPR006240;IPR000760;IPR020550	Bisphos_bac;Inositol_monophosphatase;Inositol_monophosphatase_CS
	RCAP_rcc00128	D5AKQ1	ABC transporter, permease protein	RCAP_rcc00128	273	Cytoplasmic Membrane							integral component of membrane [GO:0016021]
*	RCAP_rcc00129	D5AKQ2	Transcriptional regulator, LacI family	RCAP_rcc00129	343	Cytoplasmic					regulation of transcription, DNA-templated [GO:0006355]	DNA binding [GO:0003677]		IPR010982;IPR001761;IPR028082;IPR000843	Lambda_DNA-bd_dom;Peripla_BP/Lac1_sug-bd_dom;Peripla_BP_I;Tscrpt_reg_HTH_LacI
*	RCAP_rcc00130	D5AKQ3	UPF0313 protein RCAP_rcc00130	RCAP_rcc00130	687	Cytoplasmic	TIGR03904;	703	Unknown function	Enzymes of unknown specificity		4 iron, 4 sulfur cluster binding [GO:0051539]; catalytic activity [GO:0003824]; iron ion binding [GO:0005506]		IPR006638;IPR020612;IPR007197;IPR023404;IPR022946;IPR024560;IPR013704	Elp3/MiaB/NifB;Methylthiotransferase_CS;rSAM;rSAM_horseshoe;UPF0313;UPF0313_C;UPF0313_N
*	RCAP_rcc00131	D5AKQ4	tRNA/rRNA cytosine-C5-methylase (EC 2.1.1.-)	RCAP_rcc00131	442	Cytoplasmic						methyltransferase activity [GO:0008168]; RNA binding [GO:0003723]		IPR018314;IPR001678;IPR023267;IPR029063	Fmu/NOL1/Nop2p_CS;MeTrfase_RsmB/NOP2;RCMT;SAM-dependent_MTases
	RCAP_rcc00132	D5AKQ5	Uncharacterized protein	RCAP_rcc00132	311	Cytoplasmic Membrane							integral component of membrane [GO:0016021]
*	RCAP_rcc00133	D5AKQ6	Uncharacterized protein	RCAP_rcc00133	164	Unknown								IPR018648	DUF2076
	RCAP_rcc00134	D5AKQ7	Uncharacterized protein	RCAP_rcc00134	436	Cytoplasmic Membrane							integral component of membrane [GO:0016021]	IPR025857	MacB_PCD
	RCAP_rcc00135	D5AKQ8	Lipoprotein-releasing system ATP-binding protein LolD-1 (EC 3.6.3.-)	lolD1	245	Cytoplasmic Membrane						ATPase activity [GO:0016887]; ATP binding [GO:0005524]		IPR003593;IPR003439;IPR017871;IPR027417	AAA+_ATPase;ABC_transporter-like;ABC_transporter_CS;P-loop_NTPase
	RCAP_rcc00136	D5AKQ9	Alkaline phosphatase (EC 3.1.3.1)	phoA	497	Periplasmic						alkaline phosphatase activity [GO:0004035]		IPR017849;IPR001952;IPR017850	Alkaline_Pase-like_a/b/a;Alkaline_phosphatase;Alkaline_phosphatase_core	ko00627;ko00790;ko02020
	RCAP_rcc00137	D5AKR0	Uncharacterized protein	RCAP_rcc00137	141	Unknown
	RCAP_rcc00138	D5AKR1	Error-prone DNA polymerase (EC 2.7.7.7)	dnaE2	1116	Cytoplasmic	TIGR00594;	132	DNA metabolism	DNA replication, recombination, and repair	DNA repair [GO:0006281]; DNA replication [GO:0006260]	3'-5' exonuclease activity [GO:0008408]; DNA-directed DNA polymerase activity [GO:0003887]; nucleic acid binding [GO:0003676]	cytoplasm [GO:0005737]	IPR011708;IPR023073;IPR029460;IPR004365;IPR004013;IPR003141;IPR016195;IPR004805	DNA_pol3_alpha;DNA_pol_error_prone;DNAPol_HHH;NA-bd_OB_tRNA;PHP_C;Pol/His_phosphatase_N;Pol/histidinol_Pase-like;PolC_alpha
	RCAP_rcc00139	D5AKR2	Nucleotidyltransferase/DNA polymerase involved in DNA repair (EC 2.7.7.7)	RCAP_rcc00139	487	Cytoplasmic					DNA repair [GO:0006281]	DNA-directed DNA polymerase activity [GO:0003887]		IPR017961;IPR001126	DNA_pol_Y-fam_little_finger;DNA_repair_prot_UmuC-like
	RCAP_rcc00140	D5AKR3	Lipoprotein, putative	RCAP_rcc00140	186	Unknown								IPR027417	P-loop_NTPase
*	RCAP_rcc00141	D5AKR4	3-hydroxybutyryl-CoA dehydrogenase (EC 1.1.1.157)	hbdA	291	Cytoplasmic					fatty acid metabolic process [GO:0006631]	3-hydroxyacyl-CoA dehydrogenase activity [GO:0003857]; 3-hydroxybutyryl-CoA dehydrogenase activity [GO:0008691]; NAD+ binding [GO:0070403]		IPR022694;IPR006180;IPR006176;IPR006108;IPR008927;IPR013328;IPR016040	3-OHacyl-CoA_DH;3-OHacyl-CoA_DH_CS;3-OHacyl-CoA_DH_NAD-bd;3HC_DH_C;6-PGluconate_DH_C-like;6PGD_dom_2;NAD(P)-bd_dom	ko00362;ko00650
*	RCAP_rcc00142	D5AKR5	Uncharacterized protein	RCAP_rcc00142	273	Unknown
*	RCAP_rcc00143	D5AL52	Electron transfer flavoprotein, alpha subunit	etfA	308	Unknown						electron transfer activity [GO:0009055]; flavin adenine dinucleotide binding [GO:0050660]		IPR029035;IPR001308;IPR014730;IPR014731;IPR018206;IPR014729	DHS-like_NAD/FAD-binding_dom;ETF_a;ETF_a/b_N;ETF_asu_C;ETF_asu_C_CS;Rossmann-like_a/b/a_fold
*	RCAP_rcc00144	D5AL53	Electron transfer flavoprotein, beta subunit	etfB	252	Cytoplasmic						electron transfer activity [GO:0009055]		IPR000049;IPR014730;IPR012255;IPR014729	ET-Flavoprotein_bsu_CS;ETF_a/b_N;ETF_b;Rossmann-like_a/b/a_fold
*	RCAP_rcc00145	D5AL54	Oxidoreductase, short-chain dehydrogenase/reductase family	RCAP_rcc00145	279	Cytoplasmic						oxidoreductase activity [GO:0016491]		IPR002198;IPR002347;IPR016040;IPR020904	DH_sc/Rdtase_SDR;Glc/ribitol_DH;NAD(P)-bd_dom;Sc_DH/Rdtase_CS
*	RCAP_rcc00146	D5AL55	DNA topoisomerase 4 subunit A (EC 5.99.1.3) (Topoisomerase IV subunit A)	parC	767	Cytoplasmic					chromosome segregation [GO:0007059]; DNA topological change [GO:0006265]	ATP binding [GO:0005524]; DNA binding [GO:0003677]; DNA topoisomerase type II (ATP-hydrolyzing) activity [GO:0003918]	chromosome [GO:0005694]; extrinsic component of plasma membrane [GO:0019897]	IPR024946;IPR006691;IPR002205;IPR013758;IPR013760;IPR005742	Arg_repress_C-like;GyrA/parC_pinwhl;Topo_IIA_A/C;Topo_IIA_A/C_ab;Topo_IIA_like_dom;TopoIV_A_Gneg
*	RCAP_rcc00147	D5AL56	Elongation factor Tu (EF-Tu)	tuf1	391	Cytoplasmic	TIGR00485;TIGR00231;	169	Protein synthesis	Translation factors		GTPase activity [GO:0003924]; GTP binding [GO:0005525]; translation elongation factor activity [GO:0003746]	cytoplasm [GO:0005737]	IPR000795;IPR027417;IPR005225;IPR009000;IPR009001;IPR004161;IPR004541;IPR004160	EF_GTP-bd_dom;P-loop_NTPase;Small_GTP-bd_dom;Transl_B-barrel;Transl_elong_EF1A/Init_IF2_C;Transl_elong_EFTu/EF1A_2;Transl_elong_EFTu/EF1A_bac/org;Transl_elong_EFTu/EF1A_C	ko04626
*	RCAP_rcc00148	D5AL57	CDA peptide synthetase III	RCAP_rcc00148	1288	Unknown	TIGR01733;	156	Hypothetical proteins	Conserved	biosynthetic process [GO:0009058]	ATP binding [GO:0005524]; ligase activity [GO:0016874]	integral component of membrane [GO:0016021]	IPR010071;IPR029058;IPR009081;IPR025110;IPR020845;IPR000873;IPR004101;IPR013221;IPR000713;IPR016040;IPR006162	AA_adenyl_domain;AB_hydrolase;Acyl_carrier_prot-like;AMP-bd_C;AMP-binding_CS;AMP-dep_Synth/Lig;Mur_ligase_C;Mur_ligase_cen;Mur_ligase_N;NAD(P)-bd_dom;Ppantetheine_attach_site
*	RCAP_rcc00149	D5AL58	Uncharacterized protein	RCAP_rcc00149	187	Unknown								IPR003848;IPR014729	DUF218;Rossmann-like_a/b/a_fold
*	RCAP_rcc00150	D5AL59	Uncharacterized protein	RCAP_rcc00150	165	Unknown	TIGR04108;	719	Signal transduction	Other				IPR010413	HutX_like
	RCAP_rcc00151	D5AL60	Oxygen-independent coproporphyrinogen-III oxidase-1 (EC 1.3.99.22)	hemN1	460	Cytoplasmic	TIGR04107;	719	Signal transduction	Other		coproporphyrinogen dehydrogenase activity [GO:0051989]; iron-sulfur cluster binding [GO:0051536]		IPR006638;IPR007197;IPR023404;IPR026332	Elp3/MiaB/NifB;rSAM;rSAM_horseshoe;rSAM_HutW	ko00860
	RCAP_rcc00152	D5AL61	Peptide ABC transporter, periplasmic peptide-binding protein	RCAP_rcc00152	500	Periplasmic					transmembrane transport [GO:0055085]		ATP-binding cassette (ABC) transporter complex [GO:0043190]	IPR030678;IPR000914	Peptide/Ni-bd;SBP_5_dom	ko02010
	RCAP_rcc00153	D5AL62	Peptide ABC transporter, permease protein	RCAP_rcc00153	314	Cytoplasmic Membrane					transmembrane transport [GO:0055085]		integral component of membrane [GO:0016021]; plasma membrane [GO:0005886]	IPR000515	MetI-like	ko02010
	RCAP_rcc00154	D5AL63	Peptide ABC transporter, permease protein	RCAP_rcc00154	257	Cytoplasmic Membrane					transmembrane transport [GO:0055085]		integral component of membrane [GO:0016021]; plasma membrane [GO:0005886]	IPR000515	MetI-like	ko02010
	RCAP_rcc00155	D5AL64	Peptide ABC transporter, ATP-binding protein	RCAP_rcc00155	461	Cytoplasmic Membrane						ATPase activity [GO:0016887]; ATP binding [GO:0005524]		IPR003593;IPR003439;IPR017871;IPR013563;IPR027417	AAA+_ATPase;ABC_transporter-like;ABC_transporter_CS;Oligopep_ABC_C;P-loop_NTPase
*	RCAP_rcc00156	D5AL65	Sodium/amino acid symporter	alsT	452	Cytoplasmic Membrane	TIGR00835;	143	Transport and binding proteins	Anions		alanine:sodium symporter activity [GO:0015655]	integral component of membrane [GO:0016021]; plasma membrane [GO:0005886]	IPR001463	Na/Ala_symport
*	RCAP_rcc00157	D5AL66	Uncharacterized protein	RCAP_rcc00157	326	Cytoplasmic
*	RCAP_rcc00158	D5AL67	Peptidase, M10 family (EC 3.4.24.-)	RCAP_rcc00158	586	Extracellular						calcium ion binding [GO:0005509]; metalloendopeptidase activity [GO:0004222]; zinc ion binding [GO:0008270]	extracellular matrix [GO:0031012]; extracellular space [GO:0005615]	IPR018511;IPR001343;IPR024079;IPR001818;IPR007280;IPR013858;IPR006026;IPR011049	Hemolysin-typ_Ca-bd_CS;Hemolysn_Ca-bd;MetalloPept_cat_dom;Pept_M10_metallopeptidase;Peptidase_C_arc/bac;Peptidase_M10B_C;Peptidase_Metallo;Serralysin-like_metalloprot_C
*	RCAP_rcc00159	D5AL68	Uncharacterized protein	RCAP_rcc00159	123	Unknown
*	RCAP_rcc00160	D5AL69	Biosynthetic peptidoglycan transglycosylase (EC 2.4.1.129) (Glycan polymerase) (Peptidoglycan glycosyltransferase MtgA) (PGT)	mtgA	249	Cytoplasmic Membrane	TIGR02070;	89	Cell envelope	Biosynthesis and degradation of murein sacculus and peptidoglycan	cell wall organization [GO:0071555]; peptidoglycan biosynthetic process [GO:0009252]; regulation of cell shape [GO:0008360]	peptidoglycan glycosyltransferase activity [GO:0008955]; transferase activity, transferring pentosyl groups [GO:0016763]	integral component of membrane [GO:0016021]; peptidoglycan-based cell wall [GO:0009274]; plasma membrane [GO:0005886]	IPR001264;IPR023346;IPR011812	Glyco_trans_51;Lysozyme-like_dom;Mono_pep_trsgly	ko00550
*	RCAP_rcc00161	D5AL70	Glutamate synthase (NADPH), alpha subunit (EC 1.4.1.13)	gltB	1512	Unknown					glutamate biosynthetic process [GO:0006537]	glutamate synthase (NADPH) activity [GO:0004355]		IPR013785;IPR017932;IPR000583;IPR002489;IPR006982;IPR002932;IPR029055	Aldolase_TIM;GATase_2_dom;GATase_dom;Glu_synth_asu_C;Glu_synth_centr_N;Glu_synthdom;Ntn_hydrolases_N	ko00250;ko00910
	RCAP_rcc00162	D5AL71	Uncharacterized protein	RCAP_rcc00162	245	Unknown
*	RCAP_rcc00163	D5AL72	Glutamate synthase (NADPH), beta subunit (EC 1.4.1.13)	gltD	477	Cytoplasmic	TIGR01318;	73	Amino acid biosynthesis	Glutamate family	glutamate biosynthetic process [GO:0006537]	glutamate synthase (NADPH) activity [GO:0004355]; iron-sulfur cluster binding [GO:0051536]		IPR028261;IPR006006;IPR009051;IPR016040;IPR023753	DPD_II;Glut_synth_ssu2;Helical_ferredxn;NAD(P)-bd_dom;Pyr_nucl-diS_OxRdtase_FAD/NAD	ko00250;ko00910
	RCAP_rcc00164	D5AL73	Undecaprenyl-diphosphatase (EC 3.6.1.27) (Bacitracin resistance protein) (Undecaprenyl pyrophosphate phosphatase)	uppP	264	Cytoplasmic Membrane					cell wall organization [GO:0071555]; dephosphorylation [GO:0016311]; peptidoglycan biosynthetic process [GO:0009252]; regulation of cell shape [GO:0008360]; response to antibiotic [GO:0046677]	undecaprenyl-diphosphatase activity [GO:0050380]	integral component of membrane [GO:0016021]; plasma membrane [GO:0005886]	IPR003824	UppP	ko00550
*	RCAP_rcc00165	D5AL74	NAD-dependent epimerase/dehydratase family protein	RCAP_rcc00165	325	Cytoplasmic								IPR016040	NAD(P)-bd_dom
*	RCAP_rcc00166	D5AL75	Sulfotransferase family protein	RCAP_rcc00166	256	Cytoplasmic						sulfotransferase activity [GO:0008146]		IPR027417;IPR000863	P-loop_NTPase;Sulfotransferase_dom
*	RCAP_rcc00167	D5AL76	Glycosyl transferase, family 2/group 1 (EC 2.4.1.-)	RCAP_rcc00167	1993	Cytoplasmic						transferase activity, transferring glycosyl groups [GO:0016757]		IPR001296;IPR001173;IPR029044;IPR027417	Glyco_trans_1;Glyco_trans_2-like;Nucleotide-diphossugar_trans;P-loop_NTPase
	RCAP_rcc00168	D5AL77	Transport permease protein	RCAP_rcc00168	267	Cytoplasmic Membrane					transmembrane transport [GO:0055085]		ATP-binding cassette (ABC) transporter complex [GO:0043190]	IPR013525;IPR000412	ABC_2_trans;ABC_2_transport	ko02010
*	RCAP_rcc00169	D5AL78	Capsule polysaccharide export inner-membrane protein KpsE-1	kpsE1	409	Cytoplasmic Membrane							integral component of membrane [GO:0016021]	IPR003856	LipoPS_biosynth	ko02010
*	RCAP_rcc00170	D5AL79	Capsule polysaccharide export ATP-binding protein KpsT-1 (EC 3.6.3.38)	kpsT1	227	Cytoplasmic Membrane						ATP binding [GO:0005524]; capsular-polysaccharide-transporting ATPase activity [GO:0015436]		IPR003593;IPR003439;IPR017871;IPR027417	AAA+_ATPase;ABC_transporter-like;ABC_transporter_CS;P-loop_NTPase	ko02010
*	RCAP_rcc00171	D5AL80	Uncharacterized protein	RCAP_rcc00171	371	Unknown								IPR021251	DUF2793
*	RCAP_rcc00172	D5AL81	Glycosyl transferase family protein (EC 2.4.1.-)	RCAP_rcc00172	306	Unknown						transferase activity, transferring glycosyl groups [GO:0016757]		IPR001173;IPR029044	Glyco_trans_2-like;Nucleotide-diphossugar_trans
*	RCAP_rcc00173	D5AL82	Glucose-1-phosphate thymidylyltransferase (EC 2.7.7.24)	rfbA	291	Cytoplasmic	TIGR01207;	90	Cell envelope	Biosynthesis and degradation of surface polysaccharides and lipopolysaccharides	extracellular polysaccharide biosynthetic process [GO:0045226]	glucose-1-phosphate thymidylyltransferase activity [GO:0008879]; metal ion binding [GO:0046872]		IPR005907;IPR005835;IPR029044	G1P_thy_trans_s;NTP_transferase;Nucleotide-diphossugar_trans	ko00521;ko00523
*	RCAP_rcc00174	D5AL83	dTDP-4-dehydrorhamnose reductase (EC 1.1.1.133)	rfbD	282	Cytoplasmic	TIGR01214;	90	Cell envelope	Biosynthesis and degradation of surface polysaccharides and lipopolysaccharides	dTDP-rhamnose biosynthetic process [GO:0019305]	dTDP-4-dehydrorhamnose reductase activity [GO:0008831]		IPR005913;IPR016040;IPR029900;IPR029903	dTDP_dehydrorham_reduct;NAD(P)-bd_dom;RmlD;RmlD-like-bd	ko00521;ko00523
*	RCAP_rcc00175	D5AL84	Conserved domain protein	RCAP_rcc00175	225	Unknown								IPR027417	P-loop_NTPase
*	RCAP_rcc00176	D5AL85	dTDP-glucose 4,6-dehydratase (EC 4.2.1.46)	rfbB	353	Cytoplasmic	TIGR01181;	90	Cell envelope	Biosynthesis and degradation of surface polysaccharides and lipopolysaccharides	nucleotide-sugar metabolic process [GO:0009225]	dTDP-glucose 4,6-dehydratase activity [GO:0008460]; oxidoreductase activity [GO:0016491]		IPR005888;IPR001509;IPR016040;IPR020904	dTDP_Gluc_deHydtase;Epimerase_deHydtase_N;NAD(P)-bd_dom;Sc_DH/Rdtase_CS	ko00521;ko00523;ko01055
*	RCAP_rcc00177	D5AL86	dTDP-4-dehydrorhamnose 3,5-epimerase (EC 5.1.3.13) (Thymidine diphospho-4-keto-rhamnose 3,5-epimerase)	rfbC	187	Cytoplasmic	TIGR01221;	90	Cell envelope	Biosynthesis and degradation of surface polysaccharides and lipopolysaccharides	dTDP-rhamnose biosynthetic process [GO:0019305]	dTDP-4-dehydrorhamnose 3,5-epimerase activity [GO:0008830]		IPR000888;IPR014710;IPR011051	dTDP_sugar_isom;RmlC-like_jellyroll;RmlC_Cupin	ko00521;ko00523
	RCAP_rcc00178	D5AL87	Hemolysin-type calcium-binding repeat family protein	RCAP_rcc00178	879	Extracellular					pathogenesis [GO:0009405]	calcium ion binding [GO:0005509]	extracellular region [GO:0005576]	IPR018511;IPR001343;IPR003995;IPR011049	Hemolysin-typ_Ca-bd_CS;Hemolysn_Ca-bd;RTX_toxin_determinant-A;Serralysin-like_metalloprot_C
*	RCAP_rcc00179	D5AL88	L-threonine dehydratase (EC 4.3.1.19) (Threonine deaminase)	ilvA	415	Cytoplasmic	TIGR02079;	74	Amino acid biosynthesis	Pyruvate family	isoleucine biosynthetic process [GO:0009097]	L-threonine ammonia-lyase activity [GO:0004794]; pyridoxal phosphate binding [GO:0030170]		IPR001721;IPR011820;IPR000634;IPR001926	ACT-like_dom;IlvA;Ser/Thr_deHydtase_PyrdxlP-BS;TrpB-like_PLP-dep	ko00260;ko00290
*	RCAP_rcc00180	D5AL89	Hpt domain protein	RCAP_rcc00180	109	Unknown					phosphorelay signal transduction system [GO:0000160]			IPR008207	Sig_transdc_His_kin_Hpt_dom
*	RCAP_rcc00181	D5AL90	Response regulator receiver domain/protein phosphatase 2C domain protein	RCAP_rcc00181	409	Cytoplasmic					phosphorelay signal transduction system [GO:0000160]	catalytic activity [GO:0003824]		IPR011006;IPR001932;IPR001789	CheY-like_superfamily;PP2C-like_dom;Sig_transdc_resp-reg_receiver
	RCAP_rcc00182	D5AL91	Membrane fusion protein (MFP) family protein	RCAP_rcc00182	390	Cytoplasmic Membrane	TIGR01843;	97	Protein fate	Protein and peptide secretion and trafficking	protein secretion [GO:0009306]	protein transporter activity [GO:0008565]	integral component of membrane [GO:0016021]	IPR003997;IPR006144;IPR010129	Rtx_secretion_protD_GmN_bac;Secretion_HlyD_CS;T1SS_HlyD
	RCAP_rcc00183	D5AL92	ABC transporter, ATP-binding/permease protein (EC 3.6.3.-)	RCAP_rcc00183	750	Cytoplasmic Membrane						ATPase activity, coupled to transmembrane movement of substances [GO:0042626]; ATP binding [GO:0005524]	integral component of membrane [GO:0016021]	IPR003593;IPR011527;IPR003439;IPR027417	AAA+_ATPase;ABC1_TM_dom;ABC_transporter-like;P-loop_NTPase
*	RCAP_rcc00184	D5AL93	Outer membrane efflux protein	RCAP_rcc00184	446	Outer Membrane						efflux transmembrane transporter activity [GO:0015562]		IPR003423	OMP_efflux
*	RCAP_rcc00185	D5AL94	Uncharacterized protein	RCAP_rcc00185	915	Unknown								IPR028059	SWM_rpt
*	RCAP_rcc00186	D5AL95	Hydrolase, NUDIX family (EC 3.6.1.-)	RCAP_rcc00186	147	Unknown						hydrolase activity [GO:0016787]		IPR020084;IPR000086;IPR015797	NUDIX_hydrolase_CS;NUDIX_hydrolase_dom;NUDIX_hydrolase_dom-like
*	RCAP_rcc00187	D5AL96	33 kDa chaperonin	hslO	337	Cytoplasmic					protein folding [GO:0006457]	hydrolase activity [GO:0016787]; unfolded protein binding [GO:0051082]	cytoplasm [GO:0005737]	IPR000397;IPR016154;IPR016153;IPR023212	Heat_shock_Hsp33;Heat_shock_Hsp33_C;Heat_shock_Hsp33_N;Hsp33_helix_hairpin_bin_dom
*	RCAP_rcc00188	D5AL97	Hydrolase, NUDIX family (EC 3.6.1.-)	RCAP_rcc00188	197	Cytoplasmic						hydrolase activity [GO:0016787]		IPR000086;IPR015797	NUDIX_hydrolase_dom;NUDIX_hydrolase_dom-like
*	RCAP_rcc00189	D5AL98	CCA-adding enzyme (EC 2.7.7.72)	cca	384	Cytoplasmic					RNA processing [GO:0006396]	ATP:3'-cytidine-cytidine-tRNA adenylyltransferase activity [GO:0052929]; ATP binding [GO:0005524]; CTP:3'-cytidine-tRNA cytidylyltransferase activity [GO:0052928]; CTP:tRNA cytidylyltransferase activity [GO:0052927]; RNA binding [GO:0003723]		IPR002646	PolA_pol_head_dom
*	RCAP_rcc00190	D5AL99	ABC transporter, ATP-binding/permease protein (EC 3.6.3.-)	RCAP_rcc00190	616	Cytoplasmic Membrane						ATPase activity, coupled to transmembrane movement of substances [GO:0042626]; ATP binding [GO:0005524]	integral component of membrane [GO:0016021]	IPR003593;IPR011527;IPR003439;IPR017871;IPR027417	AAA+_ATPase;ABC1_TM_dom;ABC_transporter-like;ABC_transporter_CS;P-loop_NTPase
*	RCAP_rcc00191	D5ALA0	tRNA (Uracil-5-)-methyltransferase family protein (EC 2.1.1.35)	RCAP_rcc00191	407	Cytoplasmic						S-adenosylmethionine-dependent tRNA (m5U54) methyltransferase activity [GO:0030697]		IPR030390;IPR012340;IPR029063;IPR010280	MeTrfase_TrmA_AS;NA-bd_OB-fold;SAM-dependent_MTases;U5_MeTrfase_fam
*	RCAP_rcc00192	D5ALA1	ErfK/YbiS/YcfS/YnhG family protein	RCAP_rcc00192	167	Unknown						transferase activity [GO:0016740]		IPR005490	LD_TPept_cat_dom
*	RCAP_rcc00193	D5ALA2	SCP-like extracellular protein	RCAP_rcc00193	169	Cytoplasmic Membrane								IPR014044	CAP_domain
*	RCAP_rcc00194	D5ALA3	ErfK/YbiS/YcfS/YnhG family protein/Tat domain protein	RCAP_rcc00194	203	Unknown						transferase activity [GO:0016740]		IPR005490;IPR006311	LD_TPept_cat_dom;TAT_signal
*	RCAP_rcc00195	D5ALA4	Ferrochelatase (EC 4.99.1.1) (Heme synthase) (Protoheme ferro-lyase)	hemH	351	Cytoplasmic	TIGR00109;	79	Biosynthesis of cofactors, prosthetic groups, and carriers	Heme, porphyrin, and cobalamin	heme biosynthetic process [GO:0006783]	ferrochelatase activity [GO:0004325]; metal ion binding [GO:0046872]	cytoplasm [GO:0005737]	IPR001015;IPR019772	Ferrochelatase;Ferrochelatase_AS	ko00860
*	RCAP_rcc00196	D5ALA5	Uncharacterized protein	RCAP_rcc00196	271	Unknown						methyltransferase activity [GO:0008168]		IPR013216;IPR029063	Methyltransf_11;SAM-dependent_MTases
*	RCAP_rcc00197	D5ALA6	Competence protein F	comF	245	Cytoplasmic					nucleoside metabolic process [GO:0009116]			IPR000836;IPR029057	PRibTrfase_dom;PRTase-like
*	RCAP_rcc00198	D5ALA7	Glutaredoxin	grxC	85	Unknown	TIGR02181;	112	Energy metabolism	Electron transport	cell redox homeostasis [GO:0045454]	electron transfer activity [GO:0009055]; protein disulfide oxidoreductase activity [GO:0015035]	cytoplasm [GO:0005737]	IPR011767;IPR002109;IPR014025;IPR011900;IPR012336	GLR_AS;Glutaredoxin;Glutaredoxin_subgr;GRX_bact;Thioredoxin-like_fold
*	RCAP_rcc00199	D5ALA8	Hydrolase, carbon-nitrogen family (EC 3.5.-.-)	RCAP_rcc00199	276	Cytoplasmic					nitrogen compound metabolic process [GO:0006807]	hydrolase activity [GO:0016787]		IPR003010;IPR001110	C-N_Hydrolase;UPF0012_CS
*	RCAP_rcc00200	D5ALA9	Transcriptional regulator, MarR family	RCAP_rcc00200	146	Unknown						DNA-binding transcription factor activity [GO:0003700]		IPR000835;IPR011991	HTH_MarR-typ;WHTH_DNA-bd_dom
	RCAP_rcc00201	D5ALB0	Methyltransferase (EC 2.1.1.-)	RCAP_rcc00201	367	Cytoplasmic					DNA methylation [GO:0006306]	DNA binding [GO:0003677]; N-methyltransferase activity [GO:0008170]		IPR002941;IPR002052;IPR001091;IPR029063	DNA_methylase_N4/N6;DNA_methylase_N6_adenine_CS;RM_Methylase;SAM-dependent_MTases	ko04112
*	RCAP_rcc00202	D5ALB1	Ribonuclease HII (RNase HII) (EC 3.1.26.4)	rnhB	211	Cytoplasmic					RNA catabolic process [GO:0006401]	manganese ion binding [GO:0030145]; RNA binding [GO:0003723]; RNA-DNA hybrid ribonuclease activity [GO:0004523]	cytoplasm [GO:0005737]	IPR022898;IPR001352;IPR024567;IPR012337	RNase_HII;RNase_HII/HIII;RNase_HII/HIII_dom;RNaseH-like_dom	ko03030
	RCAP_rcc00203	D5ALB2	Conserved domain protein	RCAP_rcc00203	129	Unknown
	RCAP_rcc00204	D5ALB3	Uncharacterized protein	RCAP_rcc00204	93	Cytoplasmic Membrane
*	RCAP_rcc00205	D5ALB4	Uncharacterized protein	RCAP_rcc00205	232	Cytoplasmic Membrane							integral component of membrane [GO:0016021]	IPR011991	WHTH_DNA-bd_dom
*	RCAP_rcc00206	D5ALB5	Carboxynorspermidine decarboxylase (EC 4.1.1.-)	nspC	364	Cytoplasmic					nor-spermidine biosynthetic process [GO:0045312]	carboxy-lyase activity [GO:0016831]		IPR009006;IPR022643;IPR005730;IPR029066	Ala_racemase/Decarboxylase_C;De-COase2_C;Nsp_de-COase;PLP-binding_barrel	ko00330
*	RCAP_rcc00207	D5ALB6	Saccharopine dehydrogenase (NAD+, L-lysine-forming) (EC 1.5.1.7)	lys1	411	Cytoplasmic						saccharopine dehydrogenase (NAD+, L-lysine-forming) activity [GO:0004754]		IPR016040;IPR005097	NAD(P)-bd_dom;Saccharopine_DH/HSpermid_syn
*	RCAP_rcc00208	D5ALB7	Argininosuccinate synthase (EC 6.3.4.5) (Citrulline--aspartate ligase)	argG	409	Cytoplasmic	TIGR00032;	73	Amino acid biosynthesis	Glutamate family	arginine biosynthetic process [GO:0006526]	argininosuccinate synthase activity [GO:0004055]; ATP binding [GO:0005524]	cytoplasm [GO:0005737]	IPR001518;IPR018223;IPR023434;IPR024074;IPR014729	Arginosuc_synth;Arginosuc_synth_CS;Arginosuc_synth_type_1_subfam;AS_cat/multimer_dom_body;Rossmann-like_a/b/a_fold	ko00250;ko00330
*	RCAP_rcc00209	D5ALB8	Molybdopterin biosynthesis mog protein	mogA	175	Cytoplasmic	TIGR00177;	82	Biosynthesis of cofactors, prosthetic groups, and carriers	Molybdopterin				IPR001453	MoaB/Mog_dom	ko04122
*	RCAP_rcc00210	D5ALB9	Ubiquinone biosynthesis O-methyltransferase (2-polyprenyl-6-hydroxyphenol methylase) (EC 2.1.1.222) (3-demethylubiquinone 3-O-methyltransferase) (EC 2.1.1.64)	ubiG	247	Cytoplasmic	TIGR01983;	81	Biosynthesis of cofactors, prosthetic groups, and carriers	Menaquinone and ubiquinone	ubiquinone biosynthetic process [GO:0006744]	2-polyprenyl-6-methoxy-1,4-benzoquinone methyltransferase activity [GO:0008425]; 3-demethylubiquinone-9 3-O-methyltransferase activity [GO:0008689]		IPR029063;IPR010233	SAM-dependent_MTases;UbiG_MeTrfase	ko00130
*	RCAP_rcc00211	D5ALC0	Proline iminopeptidase (PIP) (EC 3.4.11.5) (Prolyl aminopeptidase)	pip1	323	Cytoplasmic	TIGR01249;	185	Unclassified	Role category not yet assigned		aminopeptidase activity [GO:0004177]	cytoplasm [GO:0005737]	IPR029058;IPR000073;IPR002410;IPR005944	AB_hydrolase;AB_hydrolase_1;Peptidase_S33;Pro_iminopeptidase	ko00330
*	RCAP_rcc00212	D5ALC1	Ribosome maturation factor RimP	rimP	199	Cytoplasmic					ribosomal small subunit biogenesis [GO:0042274]		cytoplasm [GO:0005737]	IPR003728;IPR028998;IPR028989	Ribosome_maturation_RimP;RimP_C;RimP_N
*	RCAP_rcc00213	D5ALC2	Transcription termination/antitermination protein NusA	nusA	536	Cytoplasmic	TIGR01953;TIGR01954;	165	Transcription	Transcription factors	DNA-templated transcription, termination [GO:0006353]; transcription antitermination [GO:0031564]	DNA-binding transcription factor activity [GO:0003700]; nucleotide binding [GO:0000166]; translation elongation factor activity [GO:0003746]	cytoplasm [GO:0005737]	IPR010995;IPR004087;IPR015946;IPR025249;IPR004088;IPR009019;IPR012340;IPR030842;IPR003029;IPR022967;IPR013735;IPR010214;IPR010213	DNA_repair_Rad51/TF_NusA_a-hlx;KH_dom;KH_dom-like_a/b;KH_dom_NusA-like;KH_dom_type_1;KH_prok-type;NA-bd_OB-fold;NusA_bac;Rbsml_prot_S1_RNA-bd_dom;S1_dom;TF_NusA_N;Tscrpt_termin_fac_NusA_C_rpt;Tscrpt_termination_fac_NusA
*	RCAP_rcc00214	D5ALC3	Uncharacterized protein	RCAP_rcc00214	209	Unknown								IPR007393;IPR029064	DUF448;L30e-like
*	RCAP_rcc00215	D5ALC4	Translation initiation factor IF-2	infB	841	Cytoplasmic	TIGR00487;TIGR00231;	169	Protein synthesis	Translation factors		GTPase activity [GO:0003924]; GTP binding [GO:0005525]; translation initiation factor activity [GO:0003743]	cytoplasm [GO:0005737]	IPR000795;IPR013575;IPR006847;IPR027417;IPR005225;IPR000178;IPR015760;IPR023115;IPR009000;IPR004161	EF_GTP-bd_dom;IF2_assoc_dom_bac;IF2_N;P-loop_NTPase;Small_GTP-bd_dom;TF_IF2_bacterial-like;TIF_IF2;TIF_IF2_dom3;Transl_B-barrel;Transl_elong_EFTu/EF1A_2
	RCAP_rcc00216	D5ALC5	Uncharacterized protein	RCAP_rcc00216	45	Unknown
*	RCAP_rcc00217	D5ALC6	CTP pyrophosphohydrolase (EC 3.6.1.-)	nudG	145	Unknown						hydrolase activity [GO:0016787]		IPR020476;IPR020084;IPR000086;IPR015797	Nudix_hydrolase;NUDIX_hydrolase_CS;NUDIX_hydrolase_dom;NUDIX_hydrolase_dom-like
*	RCAP_rcc00218	D5ALC7	Arginine biosynthesis bifunctional protein ArgJ [Cleaved into: Arginine biosynthesis bifunctional protein ArgJ beta chain; Arginine biosynthesis bifunctional protein ArgJ alpha chain] [Includes: Glutamate N-acetyltransferase (EC 2.3.1.35) (Ornithine acetyltransferase) (OATase) (Ornithine transacetylase); Amino-acid acetyltransferase (EC 2.3.1.1) (N-acetylglutamate synthase) (AGSase)]	argJ	494	Cytoplasmic	TIGR00120;	73	Amino acid biosynthesis	Glutamate family	arginine biosynthetic process [GO:0006526]	acetyl-CoA:L-glutamate N-acetyltransferase activity [GO:0004042]; glutamate N-acetyltransferase activity [GO:0004358]; methione N-acyltransferase activity [GO:0103045]	cytoplasm [GO:0005737]	IPR002813;IPR016117	Arg_biosynth_ArgJ;ArgJ-like_dom	ko00330
*	RCAP_rcc00219	D5ALC8	Peptidylprolyl isomerase (EC 5.2.1.8)	RCAP_rcc00219	289	Cytoplasmic Membrane						peptidyl-prolyl cis-trans isomerase activity [GO:0003755]		IPR000297;IPR027304	PPIase_PpiC;Trigger_fact/SurA_dom
*	RCAP_rcc00220	D5ALC9	Protein translocase subunit SecA	secA	904	Cytoplasmic	TIGR00963;	97	Protein fate	Protein and peptide secretion and trafficking	intracellular protein transmembrane transport [GO:0065002]; protein import [GO:0017038]; protein targeting [GO:0006605]	ATP binding [GO:0005524]; metal ion binding [GO:0046872]	cytoplasm [GO:0005737]; plasma membrane [GO:0005886]	IPR027417;IPR004027;IPR000185;IPR020937;IPR011115;IPR014018;IPR011130;IPR011116	P-loop_NTPase;SEC_C_motif;SecA;SecA_CS;SecA_DEAD;SecA_motor_DEAD;SecA_preprotein_X-link_dom;SecA_Wing/Scaffold	ko03060;ko03070
	RCAP_rcc00221	D5ALD0	Uncharacterized protein	RCAP_rcc00221	306	Periplasmic
*	RCAP_rcc00222	D5ALD1	DNA repair protein RadC	radC	254	Cytoplasmic	TIGR00608;	132	DNA metabolism	DNA replication, recombination, and repair		metal ion binding [GO:0046872]; metallopeptidase activity [GO:0008237]		IPR001405;IPR025657;IPR010994;IPR020891	RadC;RadC_JAB;RuvA_2-like;UPF0758_CS
*	RCAP_rcc00223	D5ALD2	Chaperone protein DnaJ	dnaJ	384	Cytoplasmic	TIGR02349;	95	Protein fate	Protein folding and stabilization	DNA replication [GO:0006260]; protein folding [GO:0006457]; response to heat [GO:0009408]	ATP binding [GO:0005524]; heat shock protein binding [GO:0031072]; unfolded protein binding [GO:0051082]; zinc ion binding [GO:0008270]	cytoplasm [GO:0005737]	IPR012724;IPR002939;IPR001623;IPR018253;IPR008971;IPR001305	DnaJ;DnaJ_C;DnaJ_domain;DnaJ_domain_CS;HSP40/DnaJ_pept-bd;HSP_DnaJ_Cys-rich_dom
*	RCAP_rcc00224	D5ALD3	Chaperone protein DnaK (HSP70) (Heat shock 70 kDa protein) (Heat shock protein 70)	dnaK	637	Cytoplasmic	TIGR02350;	95	Protein fate	Protein folding and stabilization	protein folding [GO:0006457]	ATP binding [GO:0005524]; unfolded protein binding [GO:0051082]		IPR012725;IPR018181;IPR029048;IPR029047;IPR013126	Chaperone_DnaK;Heat_shock_70_CS;HSP70_C;HSP70_peptide-bd;Hsp_70_fam	ko03018;ko05152
*	RCAP_rcc00225	D5ALD4	Alpha-ketoglutarate-dependent dioxygenase AlkB (EC 1.14.11.-)	alkB	211	Unknown						dioxygenase activity [GO:0051213]		IPR027450;IPR005123	AlkB-like;Oxoglu/Fe-dep_dioxygenase
	RCAP_rcc00226	D5ALD5	Adenine DNA glycosylase (EC 3.2.2.31)	mutY	359	Cytoplasmic	TIGR01084;	132	DNA metabolism	DNA replication, recombination, and repair	base-excision repair [GO:0006284]	4 iron, 4 sulfur cluster binding [GO:0051539]; DNA binding [GO:0003677]; DNA N-glycosylase activity [GO:0019104]		IPR005760;IPR011257;IPR004036;IPR004035;IPR003651;IPR003265;IPR000445;IPR023170;IPR029119;IPR015797	A/G_AdeGlyc_MutY;DNA_glycosylase;Endonuclease-III-like_CS2;Endouclease-III_FeS-bd_BS;Endouclease3_FeS-loop_motif;HhH-GPD_domain;HhH_motif;HTH_base_excis_C;MutY_C;NUDIX_hydrolase_dom-like	ko03410
	RCAP_rcc00227	D5ALD6	Uncharacterized protein	RCAP_rcc00227	192	Cytoplasmic								IPR010593;IPR007922	DUF1159;DUF721/UPF0232
*	RCAP_rcc00228	D5ALD7	Oxidoreductase, DSBA family	RCAP_rcc00228	220	Unknown					cell redox homeostasis [GO:0045454]		cell [GO:0005623]	IPR006311;IPR012336	TAT_signal;Thioredoxin-like_fold
*	RCAP_rcc00229	D5ALD8	Tetraacyldisaccharide 4'-kinase (EC 2.7.1.130) (Lipid A 4'-kinase)	lpxK	329	Cytoplasmic	TIGR00682;	90	Cell envelope	Biosynthesis and degradation of surface polysaccharides and lipopolysaccharides	lipid A biosynthetic process [GO:0009245]	ATP binding [GO:0005524]; tetraacyldisaccharide 4'-kinase activity [GO:0009029]		IPR027417;IPR003758	P-loop_NTPase;Tetraacyldisaccharide_4-kinase	ko00540
*	RCAP_rcc00230	D5ALD9	3-deoxy-D-manno-octulosonic acid transferase (Kdo transferase) (EC 2.4.99.12) (Lipid IV(A) 3-deoxy-D-manno-octulosonic acid transferase)	kdtA1	403	Cytoplasmic Membrane						transferase activity, transferring glycosyl groups [GO:0016757]		IPR007507	Glycos_transf_N	ko00540
*	RCAP_rcc00231	D5ALE0	Uncharacterized protein	RCAP_rcc00231	85	Unknown								IPR025226	DUF4170
*	RCAP_rcc00232	D5ALE1	Xylose isomerase-like TIM barrel family protein	RCAP_rcc00232	273	Cytoplasmic						isomerase activity [GO:0016853]		IPR013022	Xyl_isomerase-like_TIM-brl
*	RCAP_rcc00233	D5ALE2	AFG1-like ATPase family protein	RCAP_rcc00233	360	Cytoplasmic						ATP binding [GO:0005524]		IPR005654;IPR027417	ATPase_AFG1-like;P-loop_NTPase
	RCAP_rcc00234	D5ALE3	Luciferase family protein	RCAP_rcc00234	339	Cytoplasmic	TIGR03858;	703	Unknown function	Enzymes of unknown specificity		oxidoreductase activity, acting on paired donors, with incorporation or reduction of molecular oxygen [GO:0016705]		IPR022290;IPR011251	CHP03858_lucif-like_mOase_put;Luciferase-like_dom
*	RCAP_rcc00235	D5ALE4	Folylpolyglutamate synthase/dihydrofolate synthase (EC 6.3.2.12) (EC 6.3.2.17)	folC	424	Cytoplasmic	TIGR01499;	78	Biosynthesis of cofactors, prosthetic groups, and carriers	Folic acid		ATP binding [GO:0005524]; dihydrofolate synthase activity [GO:0008841]; tetrahydrofolylpolyglutamate synthase activity [GO:0004326]		IPR001645;IPR018109;IPR004101;IPR013221	Folylpolyglutamate_synth;Folylpolyglutamate_synth_CS;Mur_ligase_C;Mur_ligase_cen	ko00790
*	RCAP_rcc00236	D5ALE5	Acetyl-coenzyme A carboxylase carboxyl transferase subunit beta (ACCase subunit beta) (Acetyl-CoA carboxylase carboxyltransferase subunit beta) (EC 2.1.3.15)	accD	310	Cytoplasmic	TIGR00515;	176	Fatty acid and phospholipid metabolism	Biosynthesis	fatty acid biosynthetic process [GO:0006633]; malonyl-CoA biosynthetic process [GO:2001295]	acetyl-CoA carboxylase activity [GO:0003989]; ATP binding [GO:0005524]; carboxyl- or carbamoyltransferase activity [GO:0016743]; zinc ion binding [GO:0008270]	acetyl-CoA carboxylase complex [GO:0009317]	IPR000438;IPR000022;IPR029045;IPR011762	Acetyl_CoA_COase_Trfase_b_su;Carboxyl_trans;ClpP/crotonase-like_dom;COA_CT_N	ko00061;ko00253;ko00620;ko00640;ko00720
*	RCAP_rcc00237	D5ALE6	Abortive infection protein family	RCAP_rcc00237	292	Cytoplasmic Membrane							integral component of membrane [GO:0016021]	IPR003675	CAAX_protease
	RCAP_rcc00238	D5ALE7	Probable membrane transporter protein	RCAP_rcc00238	252	Cytoplasmic Membrane							integral component of membrane [GO:0016021]; plasma membrane [GO:0005886]	IPR002781	TM_pro_TauE_like
*	RCAP_rcc00239	D5ALE8	L-asparaginase II (EC 3.5.1.1)	ansA	329	Cytoplasmic						asparaginase activity [GO:0004067]		IPR010349	Asparaginase_II
*	RCAP_rcc00240	D5ALE9	Uncharacterized protein	RCAP_rcc00240	174	Unknown								IPR010642	Invasion_prot_B
*	RCAP_rcc00241	D5ALF0	Dual-specificity RNA methyltransferase RlmN (EC 2.1.1.192) (23S rRNA (adenine(2503)-C(2))-methyltransferase) (23S rRNA m2A2503 methyltransferase) (Ribosomal RNA large subunit methyltransferase N) (tRNA (adenine(37)-C(2))-methyltransferase) (tRNA m2A37 methyltransferase)	rlmN	393	Cytoplasmic	TIGR00048;	168	Protein synthesis	tRNA and rRNA base modification	rRNA base methylation [GO:0070475]	4 iron, 4 sulfur cluster binding [GO:0051539]; metal ion binding [GO:0046872]; rRNA (adenine-C2-)-methyltransferase activity [GO:0070040]; rRNA binding [GO:0019843]; tRNA (adenine-C2-)-methyltransferase activity [GO:0002935]; tRNA binding [GO:0000049]	cytoplasm [GO:0005737]	IPR013785;IPR006638;IPR027492;IPR004383;IPR007197	Aldolase_TIM;Elp3/MiaB/NifB;RNA_MTrfase_RlmN;rRNA_lsu_MTrfase_RlmN/Cfr;rSAM
*	RCAP_rcc00242	D5ALF1	Cytokinin riboside 5'-monophosphate phosphoribohydrolase (EC 3.2.2.n1)	RCAP_rcc00242	276	Cytoplasmic	TIGR00730;	156	Hypothetical proteins	Conserved	cytokinin biosynthetic process [GO:0009691]	hydrolase activity [GO:0016787]		IPR005269	LOG
*	RCAP_rcc00243	D5ALF2	2,3,4,5-tetrahydropyridine-2,6-dicarboxylate N-succinyltransferase (EC 2.3.1.117) (Tetrahydrodipicolinate N-succinyltransferase) (THDP succinyltransferase) (THP succinyltransferase) (Tetrahydropicolinate succinylase)	dapD	275	Cytoplasmic	TIGR00965;	71	Amino acid biosynthesis	Aspartate family	diaminopimelate biosynthetic process [GO:0019877]; lysine biosynthetic process via diaminopimelate [GO:0009089]	2,3,4,5-tetrahydropyridine-2,6-dicarboxylate N-succinyltransferase activity [GO:0008666]	cytoplasm [GO:0005737]	IPR005664;IPR001451;IPR018357;IPR023180;IPR011004	DapD_Trfase_Hexpep_rpt_fam;Hexapep_transf;Hexapep_transf_CS;THP_succinylTrfase_dom1;Trimer_LpxA-like	ko00300
	RCAP_rcc00244	D5ALF3	Membrane protein, putative	RCAP_rcc00244	84	Cytoplasmic Membrane							integral component of membrane [GO:0016021]
*	RCAP_rcc00245	D5ALF4	Uncharacterized protein	RCAP_rcc00245	117	Unknown
*	RCAP_rcc00246	D5ALF5	Membrane-bound lytic murein transglycosylase B (EC 3.2.1.-)	mltB	419	Cytoplasmic Membrane	TIGR02283;	89	Cell envelope	Biosynthesis and degradation of murein sacculus and peptidoglycan	metabolic process [GO:0008152]	hydrolase activity, acting on glycosyl bonds [GO:0016798]		IPR023346;IPR011757;IPR011970;IPR002477	Lysozyme-like_dom;Lytic_transglycosylase_MltB;MltB_2;Peptidoglycan-bd-like
	RCAP_rcc00247	D5ALF6	NnrU family protein	RCAP_rcc00247	227	Cytoplasmic Membrane							integral component of membrane [GO:0016021]	IPR009915	NnrU
	RCAP_rcc00248	D5ALF7	Uncharacterized protein	RCAP_rcc00248	287	Cytoplasmic Membrane							integral component of membrane [GO:0016021]	IPR000620	EamA_dom
*	RCAP_rcc00249	D5ALF8	DNA-binding protein HU-1	hup1	95	Cytoplasmic						DNA binding [GO:0003677]		IPR000119;IPR010992	Hist_DNA-bd_bac;IHF-like_DNA-bd_dom
*	RCAP_rcc00250	D5ALF9	AMP nucleosidase (EC 3.2.2.4)	amn	491	Cytoplasmic	TIGR01717;	261	Regulatory functions	DNA interactions	AMP salvage [GO:0044209]; nucleoside metabolic process [GO:0009116]	AMP nucleosidase activity [GO:0008714]		IPR011271;IPR018953;IPR018017;IPR000845	AMP_nucleosidase;AMP_nucleoside_Pase_N;Nucleoside_phosphorylase;Nucleoside_phosphorylase_d	ko00230
*	RCAP_rcc00251	D5ALG0	Adenine deaminase (Adenase) (Adenine aminase) (EC 3.5.4.2)	ade	600	Cytoplasmic	TIGR01178;	127	Purines, pyrimidines, nucleosides, and nucleotides	Salvage of nucleosides and nucleotides	adenine catabolic process [GO:0006146]	adenine deaminase activity [GO:0000034]		IPR006679;IPR026912;IPR006680;IPR011059	Adenine_deam;Adenine_deam_C;Amidohydro_1;Metal-dep_hydrolase_composite	ko00230
*	RCAP_rcc00252	D5ALG1	NAD-dependent epimerase/dehydratase family protein	RCAP_rcc00252	275	Unknown								IPR016040	NAD(P)-bd_dom
*	RCAP_rcc00253	D5ALG2	Major facilitator superfamily MFS_1	RCAP_rcc00253	411	Cytoplasmic Membrane					transmembrane transport [GO:0055085]		integral component of membrane [GO:0016021]	IPR011701;IPR020846	MFS;MFS_dom
*	RCAP_rcc00254	D5ALG3	HI0933-like protein	RCAP_rcc00254	393	Cytoplasmic	TIGR03862;TIGR00275;	144	Transport and binding proteins	Carbohydrates, organic alcohols, and acids				IPR004792;IPR022460	CHP00275_HI0933-like;CHP03862_flavoprotein_PP4765
	RCAP_rcc00255	D5ALG4	DNA polymerase II (EC 2.7.7.7)	polB	341	Cytoplasmic					DNA replication [GO:0006260]	DNA binding [GO:0003677]; DNA-directed DNA polymerase activity [GO:0003887]		IPR008921	DNA_pol3_clamp-load_cplx_C	ko00230;ko00240;ko03030;ko03430;ko03440
*	RCAP_rcc00256	D5ALG5	Lipoprotein, putative	RCAP_rcc00256	164	Unknown					Gram-negative-bacterium-type cell outer membrane assembly [GO:0043165]		outer membrane [GO:0019867]	IPR007485	LPS_assembly_LptE
*	RCAP_rcc00257	D5ALG6	Leucine--tRNA ligase (EC 6.1.1.4) (Leucyl-tRNA synthetase) (LeuRS)	leuS	851	Cytoplasmic	TIGR00396;	137	Protein synthesis	tRNA aminoacylation	leucyl-tRNA aminoacylation [GO:0006429]	aminoacyl-tRNA editing activity [GO:0002161]; ATP binding [GO:0005524]; leucine-tRNA ligase activity [GO:0004823]	cytoplasm [GO:0005737]	IPR001412;IPR002300;IPR002302;IPR025709;IPR013155;IPR015413;IPR014729;IPR009080;IPR009008	aa-tRNA-synth_I_CS;aa-tRNA-synth_Ia;Leu-tRNA-ligase;Leu_tRNA-synth_edit;M/V/L/I-tRNA-synth_anticd-bd;Methionyl/Leucyl_tRNA_Synth;Rossmann-like_a/b/a_fold;tRNAsynth_1a_anticodon-bd;Val/Leu/Ile-tRNA-synth_edit	ko00290;ko00970
*	RCAP_rcc00258	D5ALG7	Lipoprotein, putative	RCAP_rcc00258	169	Unknown								IPR021959	DUF3576
*	RCAP_rcc00259	D5ALG8	Porin family protein	RCAP_rcc00259	316	Outer Membrane								IPR023614	Porin_dom
*	RCAP_rcc00260	D5ALG9	Pyridoxal phosphate homeostasis protein (PLP homeostasis protein)	RCAP_rcc00260	220	Cytoplasmic	TIGR00044;	703	Unknown function	Enzymes of unknown specificity		isomerase activity [GO:0016853]; pyridoxal phosphate binding [GO:0030170]		IPR001608;IPR029066;IPR011078	Ala_racemase_N;PLP-binding_barrel;UPF0001
*	RCAP_rcc00261	D5ALH0	Uncharacterized protein	RCAP_rcc00261	184	Unknown						transferase activity [GO:0016740]		IPR005490	LD_TPept_cat_dom
*	RCAP_rcc00262	D5ALH1	GTP cyclohydrolase-2 (EC 3.5.4.25) (GTP cyclohydrolase II)	ribA	359	Cytoplasmic	TIGR00505;	85	Biosynthesis of cofactors, prosthetic groups, and carriers	Riboflavin, FMN, and FAD	riboflavin biosynthetic process [GO:0009231]	GTP binding [GO:0005525]; GTP cyclohydrolase II activity [GO:0003935]; zinc ion binding [GO:0008270]		IPR000926	GTP_CycHdrlaseII_RibA	ko00740
*	RCAP_rcc00263	D5ALH2	Two component transcriptional regulator, winged helix family	RCAP_rcc00263	228	Cytoplasmic					phosphorelay signal transduction system [GO:0000160]; regulation of transcription, DNA-templated [GO:0006355]	DNA binding [GO:0003677]		IPR011006;IPR001867;IPR016032;IPR001789;IPR011991	CheY-like_superfamily;Sig_transdc_resp-reg_C;Sig_transdc_resp-reg_C-effctor;Sig_transdc_resp-reg_receiver;WHTH_DNA-bd_dom
*	RCAP_rcc00264	D5ALH3	Uncharacterized protein	RCAP_rcc00264	114	Unknown								IPR022254	DUF3775
*	RCAP_rcc00265	D5ALH4	RmuC domain protein	RCAP_rcc00265	383	Unknown							integral component of membrane [GO:0016021]	IPR003798	DNA_recombination_RmuC
*	RCAP_rcc00266	D5ALH5	DNA mismatch repair protein MutL	mutL	617	Cytoplasmic	TIGR00585;	132	DNA metabolism	DNA replication, recombination, and repair	mismatch repair [GO:0006298]	ATPase activity [GO:0016887]; ATP binding [GO:0005524]; mismatched DNA binding [GO:0030983]	mismatch repair complex [GO:0032300]	IPR013507;IPR014762;IPR002099;IPR011186;IPR020667;IPR003594;IPR014790;IPR020568;IPR014721	DNA_mismatch_repair_C;DNA_mismatch_repair_CS;DNA_mismatch_repair_fam;DNA_mismatch_repair_MLH1/HexB;DNA_mismatch_repair_MutL;HATPase_C;MutL_C;Ribosomal_S5_D2-typ_fold;Ribosomal_S5_D2-typ_fold_subgr	ko03430
*	RCAP_rcc00267	D5ALH6	Peptidase, M16 family (EC 3.4.24.-)	RCAP_rcc00267	438	Unknown						hydrolase activity [GO:0016787]; metal ion binding [GO:0046872]		IPR011249;IPR011237;IPR011765;IPR007863	Metalloenz_LuxS/M16;Pept_M16_dom;Pept_M16_N;Peptidase_M16_C
*	RCAP_rcc00268	D5ALH7	Peptidase, M16 family (EC 3.4.24.-)	RCAP_rcc00268	461	Unknown						metal ion binding [GO:0046872]; metalloendopeptidase activity [GO:0004222]		IPR011249;IPR011237;IPR011765;IPR001431;IPR007863	Metalloenz_LuxS/M16;Pept_M16_dom;Pept_M16_N;Pept_M16_Zn_BS;Peptidase_M16_C
*	RCAP_rcc00269	D5ALH8	Lipoprotein, putative	RCAP_rcc00269	184	Unknown								IPR021395	DUF3035
*	RCAP_rcc00270	D5ALH9	Lipoprotein signal peptidase (EC 3.4.23.36) (Prolipoprotein signal peptidase) (Signal peptidase II) (SPase II)	lspA	158	Cytoplasmic Membrane	TIGR00077;	97	Protein fate	Protein and peptide secretion and trafficking		aspartic-type endopeptidase activity [GO:0004190]	integral component of membrane [GO:0016021]; plasma membrane [GO:0005886]	IPR001872	Peptidase_A8	ko03060
*	RCAP_rcc00271	D5ALI0	Bifunctional purine biosynthesis protein PurH [Includes: Phosphoribosylaminoimidazolecarboxamide formyltransferase (EC 2.1.2.3) (AICAR transformylase); IMP cyclohydrolase (EC 3.5.4.10) (Inosinicase) (IMP synthase) (ATIC)]	purH	528	Cytoplasmic	TIGR00355;	125	Purines, pyrimidines, nucleosides, and nucleotides	Purine ribonucleotide biosynthesis	'de novo' IMP biosynthetic process [GO:0006189]	IMP cyclohydrolase activity [GO:0003937]; phosphoribosylaminoimidazolecarboxamide formyltransferase activity [GO:0004643]		IPR024051;IPR002695;IPR016193;IPR011607	AICAR_Tfase_dom;AICARFT_IMPCHas;Cytidine_deaminase-like;MGS-like_dom	ko00230;ko00670
*	RCAP_rcc00272	D5ALW7	Heparinase II/III family protein	RCAP_rcc00272	586	Unknown						lyase activity [GO:0016829]		IPR012480	Hepar_II_III
*	RCAP_rcc00273	D5ALW8	Ribosomal RNA small subunit methyltransferase B-1 (EC 2.1.1.-)	rsmB1	421	Cytoplasmic					regulation of transcription, DNA-templated [GO:0006355]	methyltransferase activity [GO:0008168]; RNA binding [GO:0003723]		IPR018314;IPR001678;IPR006027;IPR023267;IPR029063	Fmu/NOL1/Nop2p_CS;MeTrfase_RsmB/NOP2;NusB_RsmB_TIM44;RCMT;SAM-dependent_MTases
	RCAP_rcc00274	D5ALW9	Uncharacterized protein	RCAP_rcc00274	59	Unknown								IPR012875	DUF1674
*	RCAP_rcc00275	D5ALX0	4-hydroxy-tetrahydrodipicolinate reductase (HTPA reductase) (EC 1.17.1.8)	dapB	273	Cytoplasmic	TIGR00036;	71	Amino acid biosynthesis	Aspartate family	diaminopimelate biosynthetic process [GO:0019877]; lysine biosynthetic process via diaminopimelate [GO:0009089]	4-hydroxy-tetrahydrodipicolinate reductase [GO:0008839]; NAD binding [GO:0051287]; NADP binding [GO:0050661]; oxidoreductase activity, acting on CH or CH2 groups, NAD or NADP as acceptor [GO:0016726]	cytoplasm [GO:0005737]	IPR022663;IPR000846;IPR022664;IPR023940;IPR016040	DapB_C;DapB_N;DapB_N_CS;DHDPR_bac;NAD(P)-bd_dom	ko00300
*	RCAP_rcc00276	D5ALX1	Ribosome-binding factor A	rbfA	144	Cytoplasmic	TIGR00082;	166	Transcription	RNA processing	maturation of SSU-rRNA [GO:0030490]		cytoplasm [GO:0005737]	IPR015946;IPR000238;IPR023799;IPR020053	KH_dom-like_a/b;Ribosome-bd_facA;Ribosome-bd_facA_dom;Ribosome-bd_factorA_CS
*	RCAP_rcc00277	D5ALX2	Uncharacterized protein	RCAP_rcc00277	247	Unknown								IPR018711	DUF2233
*	RCAP_rcc00278	D5ALX3	tRNA pseudouridine synthase B (EC 5.4.99.25) (tRNA pseudouridine(55) synthase) (Psi55 synthase) (tRNA pseudouridylate synthase) (tRNA-uridine isomerase)	truB	303	Cytoplasmic	TIGR00431;	168	Protein synthesis	tRNA and rRNA base modification	tRNA pseudouridine synthesis [GO:0031119]	RNA binding [GO:0003723]; tRNA pseudouridine synthase activity [GO:0106029]		IPR002501;IPR020103;IPR014780	PsdUridine_synth;PsdUridine_synth_cat_dom;tRNA_psdUridine_synth_TruB
*	RCAP_rcc00279	D5ALX4	Uncharacterized protein	RCAP_rcc00279	172	Unknown								IPR012441	DUF1643
	RCAP_rcc00280	D5ALX5	Hemolysin-type calcium-binding repeat family protein	RCAP_rcc00280	351	Extracellular						calcium ion binding [GO:0005509]		IPR018511;IPR001343;IPR011049	Hemolysin-typ_Ca-bd_CS;Hemolysn_Ca-bd;Serralysin-like_metalloprot_C
*	RCAP_rcc00281	D5ALX6	30S ribosomal protein S15	rpsO	89	Cytoplasmic	TIGR00952;	158	Protein synthesis	Ribosomal proteins: synthesis and modification	translation [GO:0006412]	rRNA binding [GO:0019843]; structural constituent of ribosome [GO:0003735]	ribosome [GO:0005840]	IPR000589;IPR005290;IPR009068	Ribosomal_S15;Ribosomal_S15_bac-type;S15_NS1_RNA-bd	ko03010
*	RCAP_rcc00282	D5ALX7	Aldehyde dehydrogenase family protein (EC 1.2.1.-)	RCAP_rcc00282	478	Cytoplasmic						oxidoreductase activity, acting on the aldehyde or oxo group of donors, NAD or NADP as acceptor [GO:0016620]		IPR016161;IPR016163;IPR016162;IPR015590	Ald_DH/histidinol_DH;Ald_DH_C;Ald_DH_N;Aldehyde_DH_dom	ko00010;ko00040;ko00053;ko00071;ko00280;ko00310;ko00330;ko00340;ko00380;ko00410;ko00561;ko00620;ko00625;ko00640;ko00903
	RCAP_rcc00283	D5ALX8	Uncharacterized protein	RCAP_rcc00283	72	Unknown
*	RCAP_rcc00284	D5ALX9	Polyribonucleotide nucleotidyltransferase (EC 2.7.7.8) (Polynucleotide phosphorylase) (PNPase)	pnp	717	Cytoplasmic	TIGR03591;	134	Transcription	Degradation of RNA	mRNA catabolic process [GO:0006402]; RNA processing [GO:0006396]	magnesium ion binding [GO:0000287]; polyribonucleotide nucleotidyltransferase activity [GO:0004654]; RNA binding [GO:0003723]	cytoplasm [GO:0005737]	IPR001247;IPR015847;IPR004087;IPR004088;IPR012340;IPR012162;IPR027408;IPR015848;IPR003029;IPR020568;IPR022967	ExoRNase_PH_dom1;ExoRNase_PH_dom2;KH_dom;KH_dom_type_1;NA-bd_OB-fold;PNPase;PNPase/RNase_PH_dom;PNPase_PH_RNA-bd_bac/org-type;Rbsml_prot_S1_RNA-bd_dom;Ribosomal_S5_D2-typ_fold;S1_dom	ko00230;ko00240;ko03018
*	RCAP_rcc00285	D5ALY0	Protein translocase subunit SecE	secE	60	Cytoplasmic Membrane	TIGR00964;	97	Protein fate	Protein and peptide secretion and trafficking	intracellular protein transmembrane transport [GO:0065002]; protein secretion [GO:0009306]; protein targeting [GO:0006605]; protein transport by the Sec complex [GO:0043952]	P-P-bond-hydrolysis-driven protein transmembrane transporter activity [GO:0015450]	integral component of membrane [GO:0016021]; plasma membrane [GO:0005886]	IPR022943;IPR005807;IPR001901	SecE;SecE_bac;Translocase_SecE/Sec61-g	ko03060;ko03070
*	RCAP_rcc00286	D5ALY1	Transcription termination/antitermination protein NusG	nusG	179	Cytoplasmic	TIGR00922;	165	Transcription	Transcription factors	DNA-templated transcription, elongation [GO:0006354]; DNA-templated transcription, termination [GO:0006353]; regulation of DNA-templated transcription, elongation [GO:0032784]; transcription antitermination [GO:0031564]			IPR005824;IPR006645;IPR014722;IPR001062;IPR015869;IPR008991	KOW;NGN_dom;Rib_L2_dom2;Transcrpt_antiterm_NusG;Transcrpt_antiterm_NusG_bac_CS;Translation_prot_SH3-like
*	RCAP_rcc00287	D5ALY2	50S ribosomal protein L11	rplK	150	Cytoplasmic	TIGR01632;	158	Protein synthesis	Ribosomal proteins: synthesis and modification	translation [GO:0006412]	large ribosomal subunit rRNA binding [GO:0070180]; structural constituent of ribosome [GO:0003735]	ribosome [GO:0005840]	IPR000911;IPR006519;IPR020783;IPR020785;IPR020784	Ribosomal_L11/L12;Ribosomal_L11_bac-typ;Ribosomal_L11_C;Ribosomal_L11_CS;Ribosomal_L11_N	ko03010
*	RCAP_rcc00288	D5ALY3	50S ribosomal protein L1	rplA	232	Cytoplasmic	TIGR01169;	158	Protein synthesis	Ribosomal proteins: synthesis and modification	regulation of translation [GO:0006417]; translation [GO:0006412]	rRNA binding [GO:0019843]; structural constituent of ribosome [GO:0003735]; tRNA binding [GO:0000049]	large ribosomal subunit [GO:0015934]	IPR005878;IPR002143;IPR023674;IPR028364;IPR016094;IPR016095;IPR023673	Ribosom_L1_bac-type;Ribosomal_L1;Ribosomal_L1-like;Ribosomal_L1/biogenesis;Ribosomal_L1_2-a/b-sand;Ribosomal_L1_3-a/b-sand;Ribosomal_L1_CS	ko03010
*	RCAP_rcc00289	D5ALY4	50S ribosomal protein L10	rplJ	171	Cytoplasmic					ribosome biogenesis [GO:0042254]; translation [GO:0006412]	large ribosomal subunit rRNA binding [GO:0070180]; structural constituent of ribosome [GO:0003735]	ribosome [GO:0005840]	IPR022973;IPR002363;IPR001790	Ribosomal_L10;Ribosomal_L10_eubac_CS;Ribosomal_L10P	ko03010
*	RCAP_rcc00290	D5ALY5	50S ribosomal protein L7/L12	rplL	124	Unknown	TIGR00855;	158	Protein synthesis	Ribosomal proteins: synthesis and modification	translation [GO:0006412]	structural constituent of ribosome [GO:0003735]	ribosome [GO:0005840]	IPR000206;IPR014719;IPR013823;IPR008932	Ribosomal_L7/12;Ribosomal_L7/12_C/ClpS-like;Ribosomal_L7/L12_C;Ribosomal_L7/L12_oligo	ko03010
*	RCAP_rcc00291	D5ALY6	DNA-directed RNA polymerase subunit beta (RNAP subunit beta) (EC 2.7.7.6) (RNA polymerase subunit beta) (Transcriptase subunit beta)	rpoB	1379	Cytoplasmic	TIGR02013;	135	Transcription	DNA-dependent RNA polymerase	transcription, DNA-templated [GO:0006351]	DNA binding [GO:0003677]; DNA-directed 5'-3' RNA polymerase activity [GO:0003899]; ribonucleoside binding [GO:0032549]		IPR010243;IPR019462;IPR015712;IPR007120;IPR007121;IPR007644;IPR007642;IPR007645;IPR007641;IPR014724	DNA-dir_RNA_pol_bsu;DNA-dir_RNA_pol_bsu_external_1;DNA-dir_RNA_pol_su2;DNA-dir_RNA_pol_su2_6;RNA_pol_bsu_CS;RNA_pol_bsu_protrusion;RNA_pol_Rpb2_2;RNA_pol_Rpb2_3;RNA_pol_Rpb2_7;RNA_pol_RPB2_OB-fold	ko00230;ko00240;ko03020
*	RCAP_rcc00292	D5ALY7	DNA-directed RNA polymerase subunit beta' (RNAP subunit beta') (EC 2.7.7.6) (RNA polymerase subunit beta') (Transcriptase subunit beta')	rpoC	1412	Cytoplasmic	TIGR02386;	135	Transcription	DNA-dependent RNA polymerase	transcription, DNA-templated [GO:0006351]	DNA binding [GO:0003677]; DNA-directed 5'-3' RNA polymerase activity [GO:0003899]		IPR012754;IPR000722;IPR006592;IPR007080;IPR007066;IPR007083;IPR007081	DNA-dir_RpoC_beta_prime;RNA_pol_asu;RNA_pol_N;RNA_pol_Rpb1_1;RNA_pol_Rpb1_3;RNA_pol_Rpb1_4;RNA_pol_Rpb1_5	ko00230;ko00240;ko03020
*	RCAP_rcc00293	D5ALY8	Uncharacterized protein	RCAP_rcc00293	274	Unknown								IPR021466	Put_rhamnosyl_transferase
*	RCAP_rcc00294	D5ALY9	30S ribosomal protein S12	rpsL	123	Cytoplasmic	TIGR00981;	158	Protein synthesis	Ribosomal proteins: synthesis and modification	translation [GO:0006412]	rRNA binding [GO:0019843]; structural constituent of ribosome [GO:0003735]; tRNA binding [GO:0000049]	small ribosomal subunit [GO:0015935]	IPR012340;IPR006032;IPR005679	NA-bd_OB-fold;Ribosomal_S12/S23;Ribosomal_S12_bac	ko03010
*	RCAP_rcc00295	D5ALZ0	30S ribosomal protein S7	rpsG	156	Cytoplasmic	TIGR01029;	158	Protein synthesis	Ribosomal proteins: synthesis and modification	translation [GO:0006412]	rRNA binding [GO:0019843]; structural constituent of ribosome [GO:0003735]; tRNA binding [GO:0000049]	small ribosomal subunit [GO:0015935]	IPR000235;IPR005717;IPR020606;IPR023798	Ribosomal_S5/S7;Ribosomal_S7_bac/org-type;Ribosomal_S7_CS;Ribosomal_S7_dom	ko03010
*	RCAP_rcc00296	D5ALZ1	Elongation factor G (EF-G)	fusA1	708	Cytoplasmic	TIGR00484;TIGR00231;	169	Protein synthesis	Translation factors		GTPase activity [GO:0003924]; GTP binding [GO:0005525]; translation elongation factor activity [GO:0003746]	cytoplasm [GO:0005737]	IPR000795;IPR009022;IPR000640;IPR027417;IPR020568;IPR014721;IPR005225;IPR009000;IPR004540;IPR005517;IPR004161	EF_GTP-bd_dom;EFG_III-V;EFG_V;P-loop_NTPase;Ribosomal_S5_D2-typ_fold;Ribosomal_S5_D2-typ_fold_subgr;Small_GTP-bd_dom;Transl_B-barrel;Transl_elong_EFG/EF2;Transl_elong_EFG/EF2_IV;Transl_elong_EFTu/EF1A_2
*	RCAP_rcc00298	D5ALZ3	30S ribosomal protein S10	rpsJ	102	Cytoplasmic	TIGR01049;	158	Protein synthesis	Ribosomal proteins: synthesis and modification	translation [GO:0006412]	structural constituent of ribosome [GO:0003735]; tRNA binding [GO:0000049]	ribosome [GO:0005840]	IPR001848;IPR027486	Ribosomal_S10;Ribosomal_S10_dom	ko03010
*	RCAP_rcc00299	D5ALZ4	50S ribosomal protein L3	rplC	238	Cytoplasmic	TIGR03625;	157	Unknown function	General	translation [GO:0006412]	rRNA binding [GO:0019843]; structural constituent of ribosome [GO:0003735]	ribosome [GO:0005840]	IPR000597;IPR019927;IPR009000	Ribosomal_L3;Ribosomal_L3_bac/org-type;Transl_B-barrel	ko03010
*	RCAP_rcc00300	D5ALZ5	50S ribosomal protein L4	rplD	206	Cytoplasmic	TIGR03953;	158	Protein synthesis	Ribosomal proteins: synthesis and modification	translation [GO:0006412]	rRNA binding [GO:0019843]; structural constituent of ribosome [GO:0003735]	ribosome [GO:0005840]	IPR002136;IPR023574;IPR013005	Ribosomal_L4/L1e;Ribosomal_L4_dom;Ribosomal_uL4/L1e	ko03010
*	RCAP_rcc00301	D5ALZ6	50S ribosomal protein L23	rplW	98	Cytoplasmic					translation [GO:0006412]	rRNA binding [GO:0019843]; structural constituent of ribosome [GO:0003735]	ribosome [GO:0005840]	IPR012677;IPR012678;IPR013025	Nucleotide-bd_a/b_plait;Ribosomal_L23/L15e_core_dom;Ribosomal_L25/23	ko03010
*	RCAP_rcc00302	D5ALZ7	50S ribosomal protein L2	rplB	278	Cytoplasmic	TIGR01171;	158	Protein synthesis	Ribosomal proteins: synthesis and modification	translation [GO:0006412]	rRNA binding [GO:0019843]; structural constituent of ribosome [GO:0003735]; transferase activity [GO:0016740]	large ribosomal subunit [GO:0015934]	IPR012340;IPR022666;IPR014722;IPR002171;IPR005880;IPR022669;IPR022671;IPR014726;IPR008991	NA-bd_OB-fold;Rbsml_prot_L2_RNA-bd_dom;Rib_L2_dom2;Ribosomal_L2;Ribosomal_L2_bac/org-type;Ribosomal_L2_C;Ribosomal_L2_CS;Ribosomal_L2_dom3;Translation_prot_SH3-like	ko03010
*	RCAP_rcc00303	D5ALZ8	30S ribosomal protein S19	rpsS	92	Cytoplasmic	TIGR01050;	158	Protein synthesis	Ribosomal proteins: synthesis and modification	translation [GO:0006412]	rRNA binding [GO:0019843]; structural constituent of ribosome [GO:0003735]	small ribosomal subunit [GO:0015935]	IPR002222;IPR005732;IPR020934;IPR023575	Ribosomal_S19;Ribosomal_S19_bac-type;Ribosomal_S19_CS;Ribosomal_S19_SF	ko03010
*	RCAP_rcc00304	D5ALZ9	50S ribosomal protein L22	rplV	126	Cytoplasmic	TIGR01044;	158	Protein synthesis	Ribosomal proteins: synthesis and modification	translation [GO:0006412]	rRNA binding [GO:0019843]; structural constituent of ribosome [GO:0003735]	large ribosomal subunit [GO:0015934]	IPR001063;IPR005727	Ribosomal_L22;Ribosomal_L22_bac/chlpt-type	ko03010
*	RCAP_rcc00305	D5AM00	30S ribosomal protein S3	rpsC	238	Cytoplasmic	TIGR01009;	158	Protein synthesis	Ribosomal proteins: synthesis and modification	translation [GO:0006412]	mRNA binding [GO:0003729]; rRNA binding [GO:0019843]; structural constituent of ribosome [GO:0003735]	small ribosomal subunit [GO:0015935]	IPR004087;IPR015946;IPR004044;IPR009019;IPR005704;IPR001351;IPR018280	KH_dom;KH_dom-like_a/b;KH_dom_type_2;KH_prok-type;Ribosomal_S3_bac;Ribosomal_S3_C;Ribosomal_S3_CS	ko03010
*	RCAP_rcc00306	D5AM01	50S ribosomal protein L16	rplP	137	Cytoplasmic	TIGR01164;	158	Protein synthesis	Ribosomal proteins: synthesis and modification	translation [GO:0006412]	rRNA binding [GO:0019843]; structural constituent of ribosome [GO:0003735]; tRNA binding [GO:0000049]	ribosome [GO:0005840]	IPR016180;IPR000114;IPR020798	Ribosomal_L10e/L16;Ribosomal_L16;Ribosomal_L16_CS	ko03010
*	RCAP_rcc00307	D5AM02	Uncharacterized protein	RCAP_rcc00307	226	Unknown								IPR011009	Kinase-like_dom
*	RCAP_rcc00308	D5AM03	50S ribosomal protein L29	rpmC	66	Cytoplasmic	TIGR00012;	158	Protein synthesis	Ribosomal proteins: synthesis and modification	translation [GO:0006412]	structural constituent of ribosome [GO:0003735]	ribosome [GO:0005840]	IPR001854;IPR018254	Ribosomal_L29;Ribosomal_L29_CS	ko03010
*	RCAP_rcc00309	D5AM04	30S ribosomal protein S17	rpsQ	77	Cytoplasmic	TIGR03635;	158	Protein synthesis	Ribosomal proteins: synthesis and modification	translation [GO:0006412]	rRNA binding [GO:0019843]; structural constituent of ribosome [GO:0003735]	ribosome [GO:0005840]	IPR012340;IPR000266;IPR019984	NA-bd_OB-fold;Ribosomal_S17;Ribosomal_S17_bac-type	ko03010
*	RCAP_rcc00310	D5AM05	50S ribosomal protein L14	rplN	122	Cytoplasmic	TIGR01067;	158	Protein synthesis	Ribosomal proteins: synthesis and modification	translation [GO:0006412]	rRNA binding [GO:0019843]; structural constituent of ribosome [GO:0003735]	large ribosomal subunit [GO:0015934]	IPR005745;IPR019972;IPR023571;IPR000218	Ribosomal_L14_bac-type;Ribosomal_L14_CS;Ribosomal_L14_dom;Ribosomal_L14b/L23e	ko03010
*	RCAP_rcc00311	D5AM06	50S ribosomal protein L24	rplX	102	Cytoplasmic	TIGR01079;	158	Protein synthesis	Ribosomal proteins: synthesis and modification	translation [GO:0006412]	rRNA binding [GO:0019843]; structural constituent of ribosome [GO:0003735]	ribosome [GO:0005840]	IPR005824;IPR014722;IPR003256;IPR005825;IPR008991	KOW;Rib_L2_dom2;Ribosomal_L24;Ribosomal_L24/26_CS;Translation_prot_SH3-like	ko03010
*	RCAP_rcc00312	D5AM07	50S ribosomal protein L5	rplE	185	Cytoplasmic					translation [GO:0006412]	rRNA binding [GO:0019843]; structural constituent of ribosome [GO:0003735]; tRNA binding [GO:0000049]	ribosome [GO:0005840]	IPR002132;IPR020930;IPR020929;IPR022803	Ribosomal_L5;Ribosomal_L5_bac-type;Ribosomal_L5_CS;Ribosomal_L5_domain	ko03010
*	RCAP_rcc00313	D5AM08	30S ribosomal protein S14	rpsN	101	Cytoplasmic					translation [GO:0006412]	rRNA binding [GO:0019843]; structural constituent of ribosome [GO:0003735]	ribosome [GO:0005840]	IPR001209;IPR023036;IPR018271	Ribosomal_S14;Ribosomal_S14_bac/plaastid;Ribosomal_S14_CS	ko03010
*	RCAP_rcc00314	D5AM09	30S ribosomal protein S8	rpsH	132	Cytoplasmic					translation [GO:0006412]	rRNA binding [GO:0019843]; structural constituent of ribosome [GO:0003735]	ribosome [GO:0005840]	IPR000630	Ribosomal_S8	ko03010
*	RCAP_rcc00315	D5AM10	50S ribosomal protein L6	rplF	177	Cytoplasmic	TIGR03654;	158	Protein synthesis	Ribosomal proteins: synthesis and modification	translation [GO:0006412]	rRNA binding [GO:0019843]; structural constituent of ribosome [GO:0003735]	ribosome [GO:0005840]	IPR000702;IPR020040;IPR019906;IPR002358	Ribosomal_L6;Ribosomal_L6_a/b-dom;Ribosomal_L6_bac-type;Ribosomal_L6_CS	ko03010
*	RCAP_rcc00316	D5AM11	50S ribosomal protein L18	rplR	119	Cytoplasmic	TIGR00060;	158	Protein synthesis	Ribosomal proteins: synthesis and modification	translation [GO:0006412]	rRNA binding [GO:0019843]; structural constituent of ribosome [GO:0003735]	ribosome [GO:0005840]	IPR005484;IPR004389	Ribosomal_L18/L5;Ribosomal_L18_bac-type	ko03010
*	RCAP_rcc00317	D5AM12	30S ribosomal protein S5	rpsE	186	Cytoplasmic	TIGR01021;	158	Protein synthesis	Ribosomal proteins: synthesis and modification	translation [GO:0006412]	rRNA binding [GO:0019843]; structural constituent of ribosome [GO:0003735]	small ribosomal subunit [GO:0015935]	IPR014720;IPR000851;IPR005712;IPR005324;IPR020568;IPR014721;IPR013810;IPR018192	dsRNA-bd_dom;Ribosomal_S5;Ribosomal_S5_bac-type;Ribosomal_S5_C;Ribosomal_S5_D2-typ_fold;Ribosomal_S5_D2-typ_fold_subgr;Ribosomal_S5_N;Ribosomal_S5_N_CS	ko03010
*	RCAP_rcc00318	D5AM13	50S ribosomal protein L30	rpmD	63	Unknown	TIGR01308;	158	Protein synthesis	Ribosomal proteins: synthesis and modification	translation [GO:0006412]	structural constituent of ribosome [GO:0003735]	large ribosomal subunit [GO:0015934]	IPR005996;IPR016082	Ribosomal_L30_bac-type;Ribosomal_L30_ferredoxin-like	ko03010
*	RCAP_rcc00319	D5AM14	Uncharacterized protein	RCAP_rcc00319	111	Unknown								IPR009671	RraB_dom
	RCAP_rcc00320	D5AM15	Uncharacterized protein	RCAP_rcc00320	70	Cytoplasmic Membrane							integral component of membrane [GO:0016021]
*	RCAP_rcc00321	D5AM16	50S ribosomal protein L15	rplO	156	Cytoplasmic	TIGR01071;	158	Protein synthesis	Ribosomal proteins: synthesis and modification	translation [GO:0006412]	rRNA binding [GO:0019843]; structural constituent of ribosome [GO:0003735]	large ribosomal subunit [GO:0015934]	IPR030878;IPR005749;IPR001196;IPR021131	Ribosomal_L15;Ribosomal_L15_bac-type;Ribosomal_L15_CS;Ribosomal_L18e/L15P	ko03010
*	RCAP_rcc00322	D5AM17	Protein translocase subunit SecY	secY	456	Cytoplasmic Membrane	TIGR00967;	97	Protein fate	Protein and peptide secretion and trafficking	intracellular protein transmembrane transport [GO:0065002]; protein targeting [GO:0006605]; protein transport by the Sec complex [GO:0043952]		integral component of membrane [GO:0016021]; plasma membrane [GO:0005886]	IPR026593;IPR002208;IPR030659;IPR023201	SecY;SecY/SEC61-alpha;SecY_CS;SecY_su_dom	ko03060;ko03070
*	RCAP_rcc00323	D5AM18	Adenylate kinase (AK) (EC 2.7.4.3) (ATP-AMP transphosphorylase) (ATP:AMP phosphotransferase) (Adenylate monophosphate kinase)	adk	217	Cytoplasmic	TIGR01351;	124	Purines, pyrimidines, nucleosides, and nucleotides	Nucleotide and nucleoside interconversions	AMP salvage [GO:0044209]	adenylate kinase activity [GO:0004017]; ATP binding [GO:0005524]; zinc ion binding [GO:0008270]	cytoplasm [GO:0005737]	IPR006259;IPR000850;IPR007862;IPR027417	Adenyl_kin_sub;Adenylat/UMP-CMP_kin;Adenylate_kinase_lid-dom;P-loop_NTPase	ko00230
*	RCAP_rcc00324	D5AM19	30S ribosomal protein S13	rpsM	122	Cytoplasmic	TIGR03631;	158	Protein synthesis	Ribosomal proteins: synthesis and modification	translation [GO:0006412]	rRNA binding [GO:0019843]; structural constituent of ribosome [GO:0003735]; tRNA binding [GO:0000049]	ribosome [GO:0005840]	IPR027437;IPR001892;IPR010979;IPR019980;IPR018269	30s_Rbsml_prot_S13_C;Ribosomal_S13;Ribosomal_S13-like_H2TH;Ribosomal_S13_bac-type;Ribosomal_S13_CS	ko03010
*	RCAP_rcc00325	D5AM20	30S ribosomal protein S11	rpsK	129	Cytoplasmic	TIGR03632;	158	Protein synthesis	Ribosomal proteins: synthesis and modification	translation [GO:0006412]	rRNA binding [GO:0019843]; structural constituent of ribosome [GO:0003735]	ribosome [GO:0005840]	IPR001971;IPR019981;IPR018102	Ribosomal_S11;Ribosomal_S11_bac-type;Ribosomal_S11_CS	ko03010
*	RCAP_rcc00326	D5AM21	DNA-directed RNA polymerase subunit alpha (RNAP subunit alpha) (EC 2.7.7.6) (RNA polymerase subunit alpha) (Transcriptase subunit alpha)	rpoA	338	Cytoplasmic	TIGR02027;	135	Transcription	DNA-dependent RNA polymerase	transcription, DNA-templated [GO:0006351]	DNA binding [GO:0003677]; DNA-directed 5'-3' RNA polymerase activity [GO:0003899]; protein dimerization activity [GO:0046983]		IPR011262;IPR011263;IPR011773;IPR009025;IPR011260	DNA-dir_RNA_pol_insert;DNA-dir_RNA_pol_RpoA/D/Rpb3;DNA-dir_RpoA;RBP11-like_dimer;RNAP_asu_C	ko00230;ko00240;ko03020
*	RCAP_rcc00327	D5AM22	50S ribosomal protein L17	rplQ	139	Cytoplasmic	TIGR00059;	158	Protein synthesis	Ribosomal proteins: synthesis and modification	translation [GO:0006412]	structural constituent of ribosome [GO:0003735]	ribosome [GO:0005840]	IPR000456	Ribosomal_L17	ko03010
*	RCAP_rcc00328	D5AM23	Autoinducer-binding transcriptional regulator, LuxR family	RCAP_rcc00328	203	Unknown					regulation of transcription, DNA-templated [GO:0006355]	DNA binding [GO:0003677]		IPR016032;IPR005143;IPR000792;IPR011991	Sig_transdc_resp-reg_C-effctor;TF_LuxR_autoind-bd_dom;Tscrpt_reg_LuxR_C;WHTH_DNA-bd_dom	ko02020
	RCAP_rcc00329	D5AM24	Autoinducer synthesis protein	RCAP_rcc00329	196	Unknown					quorum sensing [GO:0009372]	transferase activity [GO:0016740]		IPR016181;IPR001690;IPR018311	Acyl_CoA_acyltransferase;Autoind_synth;Autoind_synth_CS
*	RCAP_rcc00330	D5AM25	ATPase, AAA family	RCAP_rcc00330	435	Cytoplasmic					DNA recombination [GO:0006310]; DNA repair [GO:0006281]; DNA replication [GO:0006260]	DNA binding [GO:0003677]; four-way junction helicase activity [GO:0009378]		IPR003593;IPR008824;IPR008921;IPR021886;IPR027417	AAA+_ATPase;DNA_helicase_Holl-junc_RuvB_N;DNA_pol3_clamp-load_cplx_C;MgsA_C;P-loop_NTPase
	RCAP_rcc00331	D5AM26	Putative fluoride ion transporter CrcB	crcB	125	Cytoplasmic Membrane	TIGR00494;	157	Unknown function	General		inorganic anion transmembrane transporter activity [GO:0015103]	integral component of plasma membrane [GO:0005887]	IPR003691	CrcB
*	RCAP_rcc00332	D5AM27	Pseudouridine synthase (EC 5.4.99.-)	rluC	355	Cytoplasmic	TIGR00005;	168	Protein synthesis	tRNA and rRNA base modification	pseudouridine synthesis [GO:0001522]	pseudouridine synthase activity [GO:0009982]; RNA binding [GO:0003723]		IPR020103;IPR006225;IPR006224;IPR006145;IPR002942	PsdUridine_synth_cat_dom;PsdUridine_synth_RluC/D;PsdUridine_synth_RluC/D_CS;PsdUridine_synth_RsuA/RluD;S4_RNA-bd
*	RCAP_rcc00333	D5AM28	Phosphoglycolate phosphatase-1 (EC 3.1.3.18)	gph1	218	Cytoplasmic	TIGR01549;TIGR01509;	703	Unknown function	Enzymes of unknown specificity		phosphoglycolate phosphatase activity [GO:0008967]		IPR023214;IPR006439;IPR023198	HAD-like_dom;HAD-SF_hydro_IA;PGP_dom2	ko00630
*	RCAP_rcc00334	D5AM29	ATP12 chaperone protein family	RCAP_rcc00334	237	Unknown					proton-transporting ATP synthase complex assembly [GO:0043461]			IPR011419;IPR023335	ATP12_ATPase-F1F0-assembly;ATPase_assmbl_ATP12_dom
*	RCAP_rcc00335	Q52663	Glutamate/glutamine/aspartate/asparagine-binding protein BztA	bztA	338	Periplasmic	TIGR01096;	142	Transport and binding proteins	Amino acids, peptides and amines	amino acid transport [GO:0006865]		outer membrane-bounded periplasmic space [GO:0030288]	IPR005768;IPR001638	Lys_Arg_Orn-bd;Solute-binding_3/MltF_N	ko02010
*	RCAP_rcc00336	Q52664	Glutamate/glutamine/aspartate/asparagine transport system permease protein BztB	bztB	426	Cytoplasmic Membrane	TIGR01726;	142	Transport and binding proteins	Amino acids, peptides and amines	amino acid transport [GO:0006865]	transmembrane transporter activity [GO:0022857]	ATP-binding cassette (ABC) transporter complex [GO:0043190]	IPR010065;IPR000515	AA_ABC_transptr_permease_3TM;MetI-like	ko02010
*	RCAP_rcc00337	Q52665	Glutamate/glutamine/aspartate/asparagine transport system permease protein BztC	bztC	434	Cytoplasmic Membrane	TIGR01726;	142	Transport and binding proteins	Amino acids, peptides and amines	amino acid transport [GO:0006865]	transmembrane transporter activity [GO:0022857]	ATP-binding cassette (ABC) transporter complex [GO:0043190]	IPR010065;IPR000515	AA_ABC_transptr_permease_3TM;MetI-like	ko02010
*	RCAP_rcc00338	Q52666	Glutamate/glutamine/aspartate/asparagine transport ATP-binding protein BztD	bztD	263	Cytoplasmic Membrane						amino acid-transporting ATPase activity [GO:0015424]; ATP binding [GO:0005524]	plasma membrane [GO:0005886]	IPR003593;IPR030679;IPR003439;IPR017871;IPR027417	AAA+_ATPase;ABC_ATPase_HisP-typ;ABC_transporter-like;ABC_transporter_CS;P-loop_NTPase	ko02010
*	RCAP_rcc00339	D5AM34	Phosphohistidine phosphatase (EC 3.1.3.-)	sixA	173	Unknown						hydrolase activity [GO:0016787]		IPR013078;IPR029033	His_Pase_superF_clade-1;His_PPase_superfam
	RCAP_rcc00340	D5AM35	Uncharacterized protein	RCAP_rcc00340	208	Periplasmic								IPR017896	4Fe4S_Fe-S-bd
*	RCAP_rcc00341	D5AM36	Acetylglutamate kinase (EC 2.7.2.8) (N-acetyl-L-glutamate 5-phosphotransferase) (NAG kinase) (NAGK)	argB	297	Cytoplasmic	TIGR00761;	73	Amino acid biosynthesis	Glutamate family	arginine biosynthetic process via ornithine [GO:0042450]	acetylglutamate kinase activity [GO:0003991]; ATP binding [GO:0005524]	cytoplasm [GO:0005737]	IPR004662;IPR001048;IPR001057	AcgluKinase;Asp/Glu/Uridylate_kinase;Glu/AcGlu_kinase	ko00300;ko00330
*	RCAP_rcc00342	D5AM37	Oxidoreductase, short-chain dehydrogenase/reductase family	RCAP_rcc00342	243	Cytoplasmic						oxidoreductase activity [GO:0016491]		IPR002198;IPR002347;IPR016040;IPR020904	DH_sc/Rdtase_SDR;Glc/ribitol_DH;NAD(P)-bd_dom;Sc_DH/Rdtase_CS
*	RCAP_rcc00343	D5AM38	Probable GTP-binding protein EngB	engB	216	Cytoplasmic	TIGR03598;	136	Protein synthesis	Other	division septum assembly [GO:0000917]	GTP binding [GO:0005525]; metal ion binding [GO:0046872]		IPR030393;IPR019987;IPR006073;IPR027417	G_ENGB_dom;GTP-bd_ribosome_bio_YsxC;GTP_binding_domain;P-loop_NTPase
*	RCAP_rcc00344	D5AM39	MOSC domain protein	RCAP_rcc00344	251	Cytoplasmic						catalytic activity [GO:0003824]; molybdenum ion binding [GO:0030151]; pyridoxal phosphate binding [GO:0030170]		IPR005302;IPR015808;IPR005303;IPR011037	MoCF_Sase_C;MoCF_Sase_C-like;MOSC_N;Pyrv_Knase-like_insert_dom
*	RCAP_rcc00345	D5AM40	Membrane protein insertase YidC (Foldase YidC) (Membrane integrase YidC) (Membrane protein YidC)	yidC	615	Cytoplasmic Membrane	TIGR03593;TIGR03592;	97	Protein fate	Protein and peptide secretion and trafficking		membrane insertase activity [GO:0032977]	integral component of membrane [GO:0016021]; plasma membrane [GO:0005886]	IPR019998;IPR028055;IPR028053;IPR001708	Membr_insert_YidC;Membr_insert_YidC/Oxa1_C;Membr_insert_YidC_N;Membrane_insert_OXA1/ALB3/YidC	ko03060;ko03070
*	RCAP_rcc00346	D5AM41	Diguanylate cyclase/phosphodiesterase family protein (EC 3.1.4.-)	RCAP_rcc00346	514	Cytoplasmic Membrane						hydrolase activity [GO:0016787]	integral component of membrane [GO:0016021]	IPR001633;IPR000160;IPR029787	EAL_dom;GGDEF_dom;Nucleotide_cyclase
*	RCAP_rcc00347	D5AM42	tRNA-cytidine(32) 2-sulfurtransferase (EC 2.8.1.-) (Two-thiocytidine biosynthesis protein A) (tRNA 2-thiocytidine biosynthesis protein TtcA)	ttcA	294	Cytoplasmic					tRNA thio-modification [GO:0034227]	4 iron, 4 sulfur cluster binding [GO:0051539]; ATP binding [GO:0005524]; magnesium ion binding [GO:0000287]; sulfurtransferase activity [GO:0016783]; tRNA binding [GO:0000049]	cytoplasm [GO:0005737]	IPR012089;IPR014729;IPR011063	2-thiocytidine_tRNA_synth_TtcA;Rossmann-like_a/b/a_fold;tRNA-lysidine/thiocyt_synth
*	RCAP_rcc00348	D5AM43	Putative membrane protein insertion efficiency factor	RCAP_rcc00348	89	Unknown	TIGR00278;	156	Hypothetical proteins	Conserved			plasma membrane [GO:0005886]	IPR002696	Membr_insert_effic_factor
*	RCAP_rcc00349	D5AM44	Ribonuclease P protein component (RNase P protein) (RNaseP protein) (EC 3.1.26.5) (Protein C5)	rnpA	162	Unknown	TIGR00188;	166	Transcription	RNA processing	tRNA 5'-leader removal [GO:0001682]	ribonuclease P activity [GO:0004526]; tRNA binding [GO:0000049]		IPR020568;IPR014721;IPR000100;IPR020539	Ribosomal_S5_D2-typ_fold;Ribosomal_S5_D2-typ_fold_subgr;RNase_P;RNase_P_CS
*	RCAP_rcc00350	D5AM45	50S ribosomal protein L34	rpmH	44	Cytoplasmic	TIGR01030;	158	Protein synthesis	Ribosomal proteins: synthesis and modification	translation [GO:0006412]	structural constituent of ribosome [GO:0003735]	ribosome [GO:0005840]	IPR000271;IPR020939	Ribosomal_L34;Ribosomal_L34_CS	ko03010
*	RCAP_rcc00351	D5AM46	Sensor histidine kinase (EC 2.7.13.3)	RCAP_rcc00351	467	Cytoplasmic Membrane						ATP binding [GO:0005524]; phosphorelay sensor kinase activity [GO:0000155]	integral component of membrane [GO:0016021]	IPR003661;IPR003660;IPR003594;IPR004358;IPR005467;IPR009082	EnvZ-like_dim/P;HAMP_linker_domain;HATPase_C;Sig_transdc_His_kin-like_C;Sig_transdc_His_kinase_core;Sig_transdc_His_kinase_dimeric
*	RCAP_rcc00352	D5AM47	Asparaginase (EC 3.5.1.1)	asnA	282	Cytoplasmic						asparaginase activity [GO:0004067]		IPR006034;IPR027473;IPR027474	Asparaginase/glutaminase;L-asparaginase_C;L-asparaginase_N	ko00250;ko00460;ko00910
*	RCAP_rcc00353	D5AM48	Membrane protein, putative	RCAP_rcc00353	168	Cytoplasmic Membrane							integral component of membrane [GO:0016021]
*	RCAP_rcc00354	D5AM49	Peptidase T (EC 3.4.11.4)	pepT	412	Cytoplasmic	TIGR01882;	138	Protein fate	Degradation of proteins, peptides, and glycopeptides	peptide metabolic process [GO:0006518]	metallopeptidase activity [GO:0008237]; tripeptide aminopeptidase activity [GO:0045148]; zinc ion binding [GO:0008270]	cytoplasm [GO:0005737]	IPR001261;IPR002933;IPR011650;IPR010161	ArgE/DapE_CS;Peptidase_M20;Peptidase_M20_dimer;Peptidase_M20B
*	RCAP_rcc00355	D5AM50	S1 RNA binding domain protein	RCAP_rcc00355	769	Cytoplasmic					nucleobase-containing compound metabolic process [GO:0006139]	nucleic acid binding [GO:0003676]		IPR003583;IPR012340;IPR003029;IPR012337;IPR010994;IPR022967;IPR023323;IPR023319;IPR018974;IPR023097;IPR006641	Hlx-hairpin-Hlx_DNA-bd_motif;NA-bd_OB-fold;Rbsml_prot_S1_RNA-bd_dom;RNaseH-like_dom;RuvA_2-like;S1_dom;Tex-like_dom;Tex-like_HTH_dom;Tex-like_N;Tex_RuvX-like_dom;YqgF/RNaseH-like_dom
*	RCAP_rcc00356	D5AM51	Uncharacterized protein	RCAP_rcc00356	608	Cytoplasmic						[protein-PII] uridylyltransferase activity [GO:0008773]		IPR000644;IPR018490;IPR000595;IPR018821;IPR005105;IPR014710	CBS_dom;cNMP-bd-like;cNMP-bd_dom;DUF294_put_nucleoTrafse_sb-bd;GlnD_Uridyltrans_N;RmlC-like_jellyroll
*	RCAP_rcc00357	D5AM52	Macrolide export ATP-binding/permease protein MacB (EC 3.6.3.-)	macB	648	Cytoplasmic Membrane					response to antibiotic [GO:0046677]	antibiotic transmembrane transporter activity [GO:0042895]; ATPase activity [GO:0016887]; ATP binding [GO:0005524]; efflux transmembrane transporter activity [GO:0015562]	integral component of membrane [GO:0016021]; plasma membrane [GO:0005886]	IPR003593;IPR003838;IPR003439;IPR017871;IPR017911;IPR025857;IPR027417	AAA+_ATPase;ABC_permease_dom;ABC_transporter-like;ABC_transporter_CS;ABC_transptr_macrolide_ATP-bd;MacB_PCD;P-loop_NTPase	ko02010
*	RCAP_rcc00358	D5AM53	Macrolide export ABC transporter, macrolide-specific efflux protein MacA	macA	390	Cytoplasmic Membrane	TIGR01730;	141	Transport and binding proteins	Unknown substrate	transmembrane transport [GO:0055085]	transporter activity [GO:0005215]	membrane [GO:0016020]	IPR030190;IPR006143	MacA;RND_pump_MFP
	RCAP_rcc00359	D5AM54	Uncharacterized protein	RCAP_rcc00359	52	Cytoplasmic Membrane
*	RCAP_rcc00360	D5AM55	Chromosome partitioning protein MipZ (EC 3.6.1.-)	mipZ	269	Cytoplasmic						hydrolase activity [GO:0016787]		IPR015223;IPR027417	ATPase_MipZ/NubP2/Cfd1;P-loop_NTPase
*	RCAP_rcc00361	D5AM56	50S ribosomal protein L31	rpmE	73	Unknown	TIGR00105;	158	Protein synthesis	Ribosomal proteins: synthesis and modification	translation [GO:0006412]	rRNA binding [GO:0019843]; structural constituent of ribosome [GO:0003735]	ribosome [GO:0005840]	IPR002150;IPR027491	Ribosomal_L31;Ribosomal_L31_A	ko03010
*	RCAP_rcc00362	D5AM57	50S ribosomal protein L19	rplS	124	Cytoplasmic	TIGR01024;	158	Protein synthesis	Ribosomal proteins: synthesis and modification	translation [GO:0006412]	structural constituent of ribosome [GO:0003735]	ribosome [GO:0005840]	IPR001857;IPR018257;IPR008991	Ribosomal_L19;Ribosomal_L19_CS;Translation_prot_SH3-like	ko03010
*	RCAP_rcc00363	D5AM58	Uncharacterized protein	RCAP_rcc00363	168	Unknown								IPR012550	DUF1706
*	RCAP_rcc00364	D5AM59	tRNA (guanine-N(1)-)-methyltransferase (EC 2.1.1.228) (M1G-methyltransferase) (tRNA [GM37] methyltransferase)	trmD	297	Cytoplasmic	TIGR00088;	168	Protein synthesis	tRNA and rRNA base modification		tRNA (guanine(37)-N(1))-methyltransferase activity [GO:0052906]	cytoplasm [GO:0005737]	IPR029028;IPR002649;IPR023148;IPR029026;IPR016009	Alpha/beta_knot_MTases;tRNA_m1G_MeTrfase_bac;tRNA_m1G_MeTrfase_C;tRNA_m1G_MTases_N;tRNA_MeTrfase_TRMD/TRM10
*	RCAP_rcc00365	D5AM60	Uncharacterized protein	RCAP_rcc00365	271	Cytoplasmic
*	RCAP_rcc00366	D5AM61	Ribosome maturation factor RimM	rimM	169	Cytoplasmic	TIGR02273;	166	Transcription	RNA processing	ribosomal small subunit biogenesis [GO:0042274]; rRNA processing [GO:0006364]	ribosome binding [GO:0043022]	ribosome [GO:0005840]	IPR011961;IPR027275;IPR011033;IPR002676;IPR009000	16S_RimM;PRC-brl_dom;PRC_barrel-like;RimM;Transl_B-barrel
*	RCAP_rcc00367	D5AM62	30S ribosomal protein S16	rpsP	116	Cytoplasmic	TIGR00002;	158	Protein synthesis	Ribosomal proteins: synthesis and modification	translation [GO:0006412]	structural constituent of ribosome [GO:0003735]	ribosome [GO:0005840]	IPR000307;IPR023803	Ribosomal_S16;Ribosomal_S16_dom	ko03010
*	RCAP_rcc00368	D5AM63	Hydroxyphenylpyruvate synthase (EC 5.4.99.5)	aroH	98	Unknown	TIGR01795;	70	Amino acid biosynthesis	Aromatic amino acid family	chorismate metabolic process [GO:0046417]	chorismate mutase activity [GO:0004106]		IPR002701;IPR020822;IPR010951	Chorismate_mutase;Chorismate_mutase_type_II;CM_bact	ko00400
*	RCAP_rcc00369	D5AM64	Acetyltransferase, GNAT family (EC 2.3.1.-)	RCAP_rcc00369	178	Unknown						transferase activity, transferring acyl groups [GO:0016746]		IPR016181;IPR000182	Acyl_CoA_acyltransferase;GNAT_dom
*	RCAP_rcc00370	D5AM65	Signal recognition particle protein (Fifty-four homolog)	ffh	502	Cytoplasmic Membrane	TIGR00959;	97	Protein fate	Protein and peptide secretion and trafficking	SRP-dependent cotranslational protein targeting to membrane [GO:0006614]	7S RNA binding [GO:0008312]; GTPase activity [GO:0003924]; GTP binding [GO:0005525]	signal recognition particle [GO:0048500]	IPR003593;IPR027417;IPR013822;IPR004125;IPR022941;IPR000897;IPR004780	AAA+_ATPase;P-loop_NTPase;Signal_recog_particl_SRP54_hlx;Signal_recog_particle_SRP54_M;SRP54;SRP54_GTPase_dom;SRP_Ffh	ko03060;ko03070
*	RCAP_rcc00371	D5AM66	Transcriptional regulator, LysR family	RCAP_rcc00371	296	Cytoplasmic						DNA binding [GO:0003677]; DNA-binding transcription factor activity [GO:0003700]		IPR005119;IPR000847;IPR011991	LysR_subst-bd;Tscrpt_reg_HTH_LysR;WHTH_DNA-bd_dom
*	RCAP_rcc00372	D5AM67	Membrane protein, putative	RCAP_rcc00372	385	Cytoplasmic Membrane							integral component of membrane [GO:0016021]	IPR014550	UCP028704_OpgC
*	RCAP_rcc00373	D5AM68	Glucans biosynthesis glucosyltransferase H (EC 2.4.1.-)	mdoH	601	Cytoplasmic Membrane						transferase activity, transferring glycosyl groups [GO:0016757]	integral component of membrane [GO:0016021]	IPR029044	Nucleotide-diphossugar_trans
	RCAP_rcc00374	D5AM69	Uncharacterized protein	RCAP_rcc00374	66	Unknown
*	RCAP_rcc00375	D5AM70	Glucans biosynthesis protein G-1	mdoG1	545	Periplasmic					carbohydrate biosynthetic process [GO:0016051]	carbohydrate binding [GO:0030246]; catalytic activity [GO:0003824]	periplasmic space [GO:0042597]	IPR011013;IPR007444;IPR014438;IPR014718;IPR013783;IPR014756;IPR006311	Gal_mutarotase_SF_dom;Glucan_biosyn_MdoG_C;Glucan_biosyn_MdoGD;Glyco_hydro-type_carb-bd_sub;Ig-like_fold;Ig_E-set;TAT_signal
	RCAP_rcc00376	D5AM71	Divalent ion symporter	RCAP_rcc00376	441	Cytoplasmic Membrane					transmembrane transport [GO:0055085]		integral component of membrane [GO:0016021]	IPR004680	Cit_transptr-like_dom
*	RCAP_rcc00377	D5AM72	Glutamate-1-semialdehyde 2,1-aminomutase (EC 5.4.3.8)	hemL	456	Cytoplasmic						glutamate-1-semialdehyde 2,1-aminomutase activity [GO:0042286]; pyridoxal phosphate binding [GO:0030170]; transaminase activity [GO:0008483]		IPR005814;IPR015424;IPR015421;IPR015422	Aminotrans_3;PyrdxlP-dep_Trfase;PyrdxlP-dep_Trfase_major_sub1;PyrdxlP-dep_Trfase_major_sub2	ko00860
*	RCAP_rcc00378	D5AM73	Glutamine synthetase-1 (EC 6.3.1.2)	glnA1	459	Cytoplasmic					nitrogen compound metabolic process [GO:0006807]	glutamate-ammonia ligase activity [GO:0004356]		IPR014746;IPR008146;IPR027303	Gln_synth/guanido_kin_cat_dom;Gln_synth_cat_dom;Gln_synth_gly_rich_site	ko00250;ko00330;ko00910;ko02020
*	RCAP_rcc00379	D5AM74	4-hydroxy-tetrahydrodipicolinate synthase (HTPA synthase) (EC 4.3.3.7)	dapA	290	Cytoplasmic	TIGR00674;	71	Amino acid biosynthesis	Aspartate family	diaminopimelate biosynthetic process [GO:0019877]; lysine biosynthetic process via diaminopimelate [GO:0009089]	4-hydroxy-tetrahydrodipicolinate synthase [GO:0008840]	cytoplasm [GO:0005737]	IPR013785;IPR005263;IPR002220;IPR020625;IPR020624	Aldolase_TIM;DapA;DapA-like;Schiff_base-form_aldolases_AS;Schiff_base-form_aldolases_CS	ko00300
*	RCAP_rcc00380	D5AM75	Transglycosylase, Slt family (EC 3.2.1.-)	RCAP_rcc00380	652	Periplasmic					peptidoglycan metabolic process [GO:0000270]	hydrolase activity, hydrolyzing O-glycosyl compounds [GO:0004553]; lytic transglycosylase activity [GO:0008933]	membrane [GO:0016020]; periplasmic space [GO:0042597]	IPR023346;IPR016026;IPR008939;IPR008258;IPR000189	Lysozyme-like_dom;Lytic_TGlyclase_suprhlx_U/L;Lytic_TGlycosylase_superhlx_U;TGlycosylase-like_SLT;Transglyc_AS
	RCAP_rcc00381	D5AM76	Uncharacterized protein	RCAP_rcc00381	292	Cytoplasmic Membrane							integral component of membrane [GO:0016021]	IPR000620	EamA_dom
*	RCAP_rcc00382	D5AM77	Uncharacterized protein	RCAP_rcc00382	221	Cytoplasmic						oxidoreductase activity, acting on the CH-NH group of donors [GO:0016645]		IPR008471;IPR029063	MnmC-like_methylTransf;SAM-dependent_MTases
*	RCAP_rcc00383	D5AM78	FAD dependent oxidoreductase	RCAP_rcc00383	348	Cytoplasmic						oxidoreductase activity [GO:0016491]		IPR006076	FAD-dep_OxRdtase
*	RCAP_rcc00384	D5AM79	Glutamate--cysteine ligase (EC 6.3.2.2)	gshA	456	Cytoplasmic	TIGR01436;	86	Biosynthesis of cofactors, prosthetic groups, and carriers	Glutathione and analogs	glutathione biosynthetic process [GO:0006750]	ATP binding [GO:0005524]; glutamate-cysteine ligase activity [GO:0004357]		IPR006336;IPR011556	GCS2;Glut_cys_lig_pln	ko00480
	RCAP_rcc00385	D5AM80	Uncharacterized protein	RCAP_rcc00385	166	Cytoplasmic Membrane							integral component of membrane [GO:0016021]
*	RCAP_rcc00386	D5AM81	Ribosomal RNA small subunit methyltransferase E (EC 2.1.1.193)	RCAP_rcc00386	241	Unknown	TIGR00046;	168	Protein synthesis	tRNA and rRNA base modification	rRNA processing [GO:0006364]	methyltransferase activity [GO:0008168]	cytoplasm [GO:0005737]	IPR029028;IPR015947;IPR006700;IPR029026	Alpha/beta_knot_MTases;PUA-like_domain;rRNA_ssu_MeTrfase-E;tRNA_m1G_MTases_N
*	RCAP_rcc00387	D5AM82	4-hydroxybenzoate octaprenyltransferase (EC 2.5.1.-) (4-HB polyprenyltransferase)	ubiA	323	Cytoplasmic Membrane	TIGR01474;	81	Biosynthesis of cofactors, prosthetic groups, and carriers	Menaquinone and ubiquinone	ubiquinone biosynthetic process [GO:0006744]	4-hydroxybenzoate octaprenyltransferase activity [GO:0008412]	integral component of membrane [GO:0016021]; plasma membrane [GO:0005886]	IPR006370;IPR000537;IPR030470	HB_polyprenyl-transferase;UbiA_prenyltransferase;UbiA_prenylTrfase_CS	ko00130
*	RCAP_rcc00388	D5AM83	OmpA/MotB domain protein	RCAP_rcc00388	739	Outer Membrane							cell outer membrane [GO:0009279]; integral component of membrane [GO:0016021]	IPR007055;IPR006664;IPR006665	BON_dom;OMP_bac;OmpA/MotB_C	ko02030;ko02040
*	RCAP_rcc00389	D5AM84	Uncharacterized protein	RCAP_rcc00389	109	Cytoplasmic Membrane							integral component of membrane [GO:0016021]
*	RCAP_rcc00390	D5AM85	Peptidase, S49 family (EC 3.4.21.-)	RCAP_rcc00390	275	Cytoplasmic Membrane						peptidase activity [GO:0008233]		IPR029045;IPR002142	ClpP/crotonase-like_dom;Peptidase_S49
	RCAP_rcc00391	D5AM86	Uncharacterized protein	RCAP_rcc00391	55	Cytoplasmic Membrane							integral component of membrane [GO:0016021]
*	RCAP_rcc00392	D5AM87	Conserved domain protein	RCAP_rcc00392	160	Unknown
*	RCAP_rcc00393	D5AM88	UvrABC system protein C (Protein UvrC) (Excinuclease ABC subunit C)	uvrC	631	Cytoplasmic	TIGR00194;	132	DNA metabolism	DNA replication, recombination, and repair	nucleotide-excision repair [GO:0006289]; SOS response [GO:0009432]	DNA binding [GO:0003677]; excinuclease ABC activity [GO:0009381]	cytoplasm [GO:0005737]; excinuclease repair complex [GO:0009380]	IPR027299;IPR000305;IPR003583;IPR010994;IPR001943;IPR004791;IPR001162	GIY-YIG_dom;GIY-YIG_SF;Hlx-hairpin-Hlx_DNA-bd_motif;RuvA_2-like;UVR_dom;UvrC;UvrC_homol_region	ko03420
	RCAP_rcc00394	D5AM89	L-lysine 2,3-aminomutase (EC 5.4.3.2)	kamA	350	Cytoplasmic	TIGR03822;TIGR00238;	140	Protein fate	Protein modification and repair		4 iron, 4 sulfur cluster binding [GO:0051539]; lysine 2,3-aminomutase activity [GO:0050066]; metal ion binding [GO:0046872]		IPR013785;IPR022447;IPR003739;IPR007197	Aldolase_TIM;Lys_aminomutase-rel;Lys_aminomutase/Glu_NH3_mut;rSAM	ko00310
*	RCAP_rcc00395	D5AM90	CDP-diacylglycerol--glycerol-3-phosphate 3-phosphatidyltransferase (EC 2.7.8.5)	pgsA	209	Cytoplasmic Membrane	TIGR00560;	176	Fatty acid and phospholipid metabolism	Biosynthesis	phospholipid biosynthetic process [GO:0008654]	CDP-diacylglycerol-glycerol-3-phosphate 3-phosphatidyltransferase activity [GO:0008444]	integral component of membrane [GO:0016021]	IPR000462;IPR004570	CDP-OH_P_trans;Phosphatidylglycerol_P_synth	ko00564
*	RCAP_rcc00396	D5AM91	Glycerol-3-phosphate acyltransferase (Acyl-PO4 G3P acyltransferase) (Acyl-phosphate--glycerol-3-phosphate acyltransferase) (G3P acyltransferase) (GPAT) (EC 2.3.1.275) (Lysophosphatidic acid synthase) (LPA synthase)	plsY	204	Cytoplasmic Membrane	TIGR00023;	176	Fatty acid and phospholipid metabolism	Biosynthesis	phospholipid biosynthetic process [GO:0008654]	acyl-phosphate glycerol-3-phosphate acyltransferase activity [GO:0043772]	integral component of membrane [GO:0016021]; plasma membrane [GO:0005886]	IPR003811	G3P_acylTferase_PlsY	ko00561;ko00564
*	RCAP_rcc00397	D5AM92	Dihydroorotase-1 (EC 3.5.2.3)	pyrC1	423	Cytoplasmic					pyrimidine nucleotide biosynthetic process [GO:0006221]	dihydroorotase activity [GO:0004151]; metal ion binding [GO:0046872]		IPR004722;IPR011059	DHOase;Metal-dep_hydrolase_composite	ko00240
*	RCAP_rcc00398	D5AM93	Uncharacterized protein	RCAP_rcc00398	189	Cytoplasmic Membrane							integral component of membrane [GO:0016021]
*	RCAP_rcc00399	D5AM94	Uncharacterized protein	RCAP_rcc00399	161	Unknown							integral component of membrane [GO:0016021]
*	RCAP_rcc00400	D5AM95	Aspartate carbamoyltransferase (EC 2.1.3.2) (Aspartate transcarbamylase) (ATCase)	pyrB	321	Cytoplasmic	TIGR00670;	126	Purines, pyrimidines, nucleosides, and nucleotides	Pyrimidine ribonucleotide biosynthesis	'de novo' pyrimidine nucleobase biosynthetic process [GO:0006207]; 'de novo' UMP biosynthetic process [GO:0044205]; cellular amino acid metabolic process [GO:0006520]	amino acid binding [GO:0016597]; aspartate carbamoyltransferase activity [GO:0004070]		IPR006132;IPR006130;IPR002082;IPR006131	Asp/Orn_carbamoyltranf_P-bd;Asp/Orn_carbamoylTrfase;Asp_carbamoyltransf;Asp_carbamoyltransf_Asp/Orn-bd	ko00240;ko00250
*	RCAP_rcc00401	D5AM96	Uracil-DNA glycosylase (EC 3.2.2.-)	udgA	270	Cytoplasmic	TIGR00758;	132	DNA metabolism	DNA replication, recombination, and repair	metabolic process [GO:0008152]	hydrolase activity, acting on glycosyl bonds [GO:0016798]		IPR005273;IPR005122	Ura-DNA_glyco_family4_dom;Uracil-DNA_glycosylase-like
*	RCAP_rcc00402	D5AM97	Uncharacterized protein	RCAP_rcc00402	265	Unknown								IPR028250	DsbDN
*	RCAP_rcc00403	D5AM98	UPF0301 protein RCAP_rcc00403	RCAP_rcc00403	183	Unknown								IPR003774	UPF0301
*	RCAP_rcc00404	D5AM99	Threonylcarbamoyl-AMP synthase (TC-AMP synthase) (EC 2.7.7.87) (L-threonylcarbamoyladenylate synthase)	RCAP_rcc00404	319	Cytoplasmic	TIGR00057;	168	Protein synthesis	tRNA and rRNA base modification	tRNA processing [GO:0008033]	ATP binding [GO:0005524]; double-stranded RNA binding [GO:0003725]; L-threonylcarbamoyladenylate synthase [GO:0061710]	cytoplasm [GO:0005737]	IPR017945;IPR005145;IPR010923;IPR006070	DHBP_synth_RibB-like_a/b_dom;SUA5;t(6)A37_SUA5;YrdC-like_dom
*	RCAP_rcc00405	D5AMA0	Acyl-CoA dehydrogenase domain protein	RCAP_rcc00405	560	Cytoplasmic						flavin adenine dinucleotide binding [GO:0050660]; oxidoreductase activity, acting on the CH-CH group of donors [GO:0016627]		IPR025878;IPR006091;IPR009075;IPR013786;IPR009100	Acyl-CoA_dh_like_C_dom;Acyl-CoA_Oxase/DH_cen-dom;AcylCo_DH/oxidase_C;AcylCoA_DH/ox_N;AcylCoA_DH/oxidase_NM_dom
*	RCAP_rcc00406	D5AMA1	Metallo-beta-lactamase family protein	RCAP_rcc00406	343	Cytoplasmic								IPR001279	Beta-lactamas-like
*	RCAP_rcc00407	D5AMN3	Lipoprotein, putative	RCAP_rcc00407	209	Unknown
	RCAP_rcc00408	D5AMN4	Branched-chain amino acid transport family protein	RCAP_rcc00408	113	Cytoplasmic Membrane							integral component of membrane [GO:0016021]	IPR008407	Brnchd-chn_aa_trnsp_AzlD
	RCAP_rcc00409	D5AMN5	AzlC family protein	RCAP_rcc00409	239	Cytoplasmic Membrane							integral component of membrane [GO:0016021]	IPR011606	Brnchd-chn_aa_trnsp_permease
	RCAP_rcc00410	D5AMN6	Acetyltransferase, GNAT family (EC 2.3.1.-)	RCAP_rcc00410	194	Unknown						transferase activity, transferring acyl groups [GO:0016746]		IPR016181;IPR000182	Acyl_CoA_acyltransferase;GNAT_dom
*	RCAP_rcc00411	D5AMN7	Peptidase, S58 family (EC 3.4.11.-)	RCAP_rcc00411	328	Cytoplasmic Membrane						aminopeptidase activity [GO:0004177]		IPR016117;IPR005321	ArgJ-like_dom;Peptidase_S58_DmpA
*	RCAP_rcc00412	D5AMN8	Arylformamidase (EC 3.5.1.9)	RCAP_rcc00412	257	Cytoplasmic						arylformamidase activity [GO:0004061]		IPR029058;IPR013094	AB_hydrolase;AB_hydrolase_3
*	RCAP_rcc00413	D5AMN9	Succinate-semialdehyde dehydrogenase (NAD(P)(+)) (EC 1.2.1.16)	gabD	492	Cytoplasmic	TIGR01780;	102	Central intermediary metabolism	Other	gamma-aminobutyric acid catabolic process [GO:0009450]	succinate-semialdehyde dehydrogenase [NAD(P)+] activity [GO:0009013]		IPR016161;IPR016163;IPR016160;IPR029510;IPR016162;IPR015590;IPR010102	Ald_DH/histidinol_DH;Ald_DH_C;Ald_DH_CS_CYS;Ald_DH_CS_GLU;Ald_DH_N;Aldehyde_DH_dom;Succ_semiAld_DH	ko00250;ko00350;ko00650
*	RCAP_rcc00414	D5AMP0	Uncharacterized protein	RCAP_rcc00414	145	Unknown								IPR009562	DUF1178
*	RCAP_rcc00415	D5AMP1	Oxidoreductase, short-chain dehydrogenase/reductase family	RCAP_rcc00415	214	Extracellular								IPR002198;IPR002347;IPR016040	DH_sc/Rdtase_SDR;Glc/ribitol_DH;NAD(P)-bd_dom
*	RCAP_rcc00416	D5AMP2	Transcriptional regulator, LysR family	RCAP_rcc00416	296	Cytoplasmic						DNA binding [GO:0003677]; DNA-binding transcription factor activity [GO:0003700]		IPR005119;IPR000847;IPR011991	LysR_subst-bd;Tscrpt_reg_HTH_LysR;WHTH_DNA-bd_dom
	RCAP_rcc00417	D5AMP3	Uncharacterized protein	RCAP_rcc00417	294	Cytoplasmic Membrane							integral component of membrane [GO:0016021]	IPR000620	EamA_dom
*	RCAP_rcc00418	D5AMP4	Transcriptional regulator, TetR family	RCAP_rcc00418	206	Unknown						DNA binding [GO:0003677]		IPR009057;IPR001647;IPR015893	Homeodomain-like;HTH_TetR;Tet_transcr_reg_TetR-like_C
*	RCAP_rcc00419	D5AMP5	NADH:flavin oxidoreductase/NADH oxidase	RCAP_rcc00419	678	Cytoplasmic						FMN binding [GO:0010181]; oxidoreductase activity [GO:0016491]		IPR013785;IPR001155	Aldolase_TIM;OxRdtase_FMN_N
*	RCAP_rcc00420	D5AMP6	Pyruvate kinase (EC 2.7.1.40)	pykA1	502	Cytoplasmic						kinase activity [GO:0016301]; magnesium ion binding [GO:0000287]; potassium ion binding [GO:0030955]; pyruvate kinase activity [GO:0004743]		IPR001697;IPR015813;IPR011037;IPR015793;IPR015806	Pyr_Knase;Pyrv/PenolPyrv_Kinase-like_dom;Pyrv_Knase-like_insert_dom;Pyrv_Knase_brl;Pyrv_Knase_insert_dom	ko00010;ko00230;ko00620;ko00710;ko04930
*	RCAP_rcc00421	D5AMP7	Aspartokinase (EC 2.7.2.4)	lysC	419	Cytoplasmic	TIGR00657;	71	Amino acid biosynthesis	Aspartate family	lysine biosynthetic process via diaminopimelate [GO:0009089]; threonine biosynthetic process [GO:0009088]	aspartate kinase activity [GO:0004072]; ATP binding [GO:0005524]		IPR002912;IPR001048;IPR005260;IPR001341;IPR018042;IPR027795	ACT_dom;Asp/Glu/Uridylate_kinase;Asp_kin_monofn;Asp_kinase_dom;Aspartate_kinase_CS;GATS-like_ACT_dom	ko00260;ko00270;ko00300
*	RCAP_rcc00422	D5AMP8	Phosphoenolpyruvate-protein phosphotransferase PtsP (EC 2.7.3.9)	ptsP	748	Cytoplasmic	TIGR01417;	112	Energy metabolism	Electron transport	phosphoenolpyruvate-dependent sugar phosphotransferase system [GO:0009401]; phosphorylation [GO:0016310]	phosphoenolpyruvate-protein phosphotransferase activity [GO:0008965]		IPR003018;IPR029016;IPR008279;IPR000121;IPR006318;IPR008731;IPR015813	GAF;GAF_dom_like;PEP-util_enz_mobile_dom;PEP_util_C;PEP_util_enz;PTS_EIN;Pyrv/PenolPyrv_Kinase-like_dom	ko02060
*	RCAP_rcc00423	D5AMP9	Uncharacterized protein	RCAP_rcc00423	87	Unknown
*	RCAP_rcc00424	D5AMQ0	Uncharacterized protein	RCAP_rcc00424	105	Unknown
*	RCAP_rcc00425	D5AMQ1	Peptidase, M48 family (EC 3.4.24.-)	RCAP_rcc00425	250	Unknown						metalloendopeptidase activity [GO:0004222]		IPR001915	Peptidase_M48
*	RCAP_rcc00426	D5AMQ2	Uncharacterized protein	RCAP_rcc00426	83	Cytoplasmic
*	RCAP_rcc00427	D5AMQ3	Pantothenate synthetase (PS) (EC 6.3.2.1) (Pantoate--beta-alanine ligase) (Pantoate-activating enzyme)	panC	279	Cytoplasmic	TIGR00125;TIGR00018;	114	Energy metabolism	Fermentation	pantothenate biosynthetic process [GO:0015940]	ATP binding [GO:0005524]; pantoate-beta-alanine ligase activity [GO:0004592]	cytoplasm [GO:0005737]	IPR004821;IPR003721;IPR014729	Cyt_trans-like;Pantoate_ligase;Rossmann-like_a/b/a_fold	ko00410;ko00770
*	RCAP_rcc00428	D5AMQ4	3-methyl-2-oxobutanoate hydroxymethyltransferase (EC 2.1.2.11) (Ketopantoate hydroxymethyltransferase) (KPHMT)	panB	274	Unknown	TIGR00222;	83	Biosynthesis of cofactors, prosthetic groups, and carriers	Pantothenate and coenzyme A	pantothenate biosynthetic process [GO:0015940]	3-methyl-2-oxobutanoate hydroxymethyltransferase activity [GO:0003864]; metal ion binding [GO:0046872]; methyltransferase activity [GO:0008168]	cytoplasm [GO:0005737]	IPR003700;IPR015813	Pantoate_hydroxy_MeTrfase;Pyrv/PenolPyrv_Kinase-like_dom	ko00770
*	RCAP_rcc00429	D5AMQ5	Uncharacterized protein	RCAP_rcc00429	112	Unknown								IPR008579;IPR014710;IPR011051	DUF861_Cupin_3;RmlC-like_jellyroll;RmlC_Cupin
*	RCAP_rcc00430	D5AMQ6	ErfK/YbiS/YcfS/YnhG family protein	RCAP_rcc00430	282	Unknown						transferase activity [GO:0016740]		IPR005490	LD_TPept_cat_dom
*	RCAP_rcc00431	D5AMQ7	Creatinase (EC 3.5.3.3)	creA	401	Cytoplasmic						creatinase activity [GO:0016980]		IPR029149;IPR028980;IPR000587;IPR000994	Creatin/AminoP/Spt16_NTD;Creatinase/Aminopeptidase_P_N;Creatinase_N;Pept_M24_structural-domain
*	RCAP_rcc00432	D5AMQ8	Multidrug resistance protein MdtB (EC 3.6.3.44)	mdtB	1022	Cytoplasmic Membrane						xenobiotic transmembrane transporting ATPase activity [GO:0008559]	integral component of membrane [GO:0016021]	IPR027463;IPR001036	AcrB_DN_DC_subdom;Acrflvin-R
*	RCAP_rcc00433	D5AMQ9	Efflux transporter, RND family, MFP subunit	RCAP_rcc00433	370	Cytoplasmic Membrane	TIGR01730;	141	Transport and binding proteins	Unknown substrate	transmembrane transport [GO:0055085]	transporter activity [GO:0005215]	membrane [GO:0016020]	IPR006143	RND_pump_MFP
*	RCAP_rcc00434	D5AMR0	Uncharacterized protein	RCAP_rcc00434	127	Unknown
	RCAP_rcc00435	D5AMR1	Membrane protein, putative	RCAP_rcc00435	60	Cytoplasmic Membrane							integral component of membrane [GO:0016021]
*	RCAP_rcc00436	D5AMR2	Cytochrome B561	cytB	162	Cytoplasmic Membrane					respiratory electron transport chain [GO:0022904]	electron transfer activity [GO:0009055]	integral component of membrane [GO:0016021]	IPR016174	Di-haem_cyt_TM
*	RCAP_rcc00437	D5AMR3	Hydrolase, alpha/beta fold family	RCAP_rcc00437	260	Unknown						hydrolase activity [GO:0016787]		IPR029058;IPR000073;IPR000639	AB_hydrolase;AB_hydrolase_1;Epox_hydrolase-like
*	RCAP_rcc00438	D5AMR4	Serine hydroxymethyltransferase (SHMT) (Serine methylase) (EC 2.1.2.1)	glyA	430	Cytoplasmic					glycine biosynthetic process from serine [GO:0019264]; tetrahydrofolate interconversion [GO:0035999]	glycine hydroxymethyltransferase activity [GO:0004372]; methyltransferase activity [GO:0008168]; pyridoxal phosphate binding [GO:0030170]	cytoplasm [GO:0005737]	IPR015424;IPR015421;IPR015422;IPR001085;IPR019798	PyrdxlP-dep_Trfase;PyrdxlP-dep_Trfase_major_sub1;PyrdxlP-dep_Trfase_major_sub2;Ser_HO-MeTrfase;Ser_HO-MeTrfase_PLP_BS	ko00260;ko00460;ko00670;ko00680
*	RCAP_rcc00439	D5AMR5	NAD kinase (EC 2.7.1.23) (ATP-dependent NAD kinase)	ppnk	253	Cytoplasmic					NAD metabolic process [GO:0019674]; NADP biosynthetic process [GO:0006741]	ATP binding [GO:0005524]; metal ion binding [GO:0046872]; NAD+ kinase activity [GO:0003951]	cytoplasm [GO:0005737]	IPR017438;IPR017437;IPR016064;IPR002504	ATP-NAD_kinase_dom_1;ATP-NAD_kinase_PpnK-typ_all-b;NAD/diacylglycerol_kinase;NADK	ko00760
*	RCAP_rcc00440	D5AMR6	Transcriptional regulatory protein ZraR	zraR	458	Cytoplasmic					phosphorelay signal transduction system [GO:0000160]; regulation of transcription, DNA-templated [GO:0006355]	ATP binding [GO:0005524]; sequence-specific DNA binding [GO:0043565]; transcription factor binding [GO:0008134]		IPR003593;IPR011006;IPR009057;IPR002197;IPR027417;IPR001789;IPR002078;IPR025944	AAA+_ATPase;CheY-like_superfamily;Homeodomain-like;HTH_Fis;P-loop_NTPase;Sig_transdc_resp-reg_receiver;Sigma_54_int;Sigma_54_int_dom_CS
	RCAP_rcc00441	D5AMR7	Sensor histidine kinase/response regulator receiver protein (EC 2.7.13.3)	RCAP_rcc00441	506	Cytoplasmic Membrane					phosphorelay signal transduction system [GO:0000160]	protein histidine kinase activity [GO:0004673]		IPR011006;IPR003661;IPR003594;IPR004358;IPR008207;IPR005467;IPR001789	CheY-like_superfamily;EnvZ-like_dim/P;HATPase_C;Sig_transdc_His_kin-like_C;Sig_transdc_His_kin_Hpt_dom;Sig_transdc_His_kinase_core;Sig_transdc_resp-reg_receiver
*	RCAP_rcc00442	D5AMR8	Propionate--CoA ligase (EC 6.2.1.17)	prpE	631	Cytoplasmic						propionate-CoA ligase activity [GO:0050218]		IPR025110;IPR020845;IPR000873	AMP-bd_C;AMP-binding_CS;AMP-dep_Synth/Lig	ko00640
*	RCAP_rcc00443	D5AMR9	Malate dehydrogenase-1 (Oxaloacetate-decarboxylating) (NADP(+)) (EC 1.1.1.40)	maeB1	759	Cytoplasmic					malate metabolic process [GO:0006108]	malate dehydrogenase (decarboxylating) (NAD+) activity [GO:0004471]; malate dehydrogenase (decarboxylating) (NADP+) activity [GO:0004473]; metal ion binding [GO:0046872]; NAD binding [GO:0051287]; oxaloacetate decarboxylase activity [GO:0008948]; transferase activity, transferring acyl groups [GO:0016746]		IPR012301;IPR012302;IPR012188;IPR016040;IPR002505	Malic_N_dom;Malic_NAD-bd;ME_PTA;NAD(P)-bd_dom;PTA_PTB	ko00620;ko00710
*	RCAP_rcc00444	D5AMS0	Cytidine deaminase (EC 3.5.4.5) (Cytidine aminohydrolase)	cdd	130	Unknown	TIGR01354;	127	Purines, pyrimidines, nucleosides, and nucleotides	Salvage of nucleosides and nucleotides		cytidine deaminase activity [GO:0004126]; zinc ion binding [GO:0008270]		IPR016192;IPR002125;IPR006262;IPR016193	APOBEC/CMP_deaminase_Zn-bd;CMP_dCMP_Zn-bd;Cyt_deam_tetra;Cytidine_deaminase-like	ko00240;ko00983
*	RCAP_rcc00445	D5AMS1	Thymidine phosphorylase (EC 2.4.2.4) (TdRPase)	deoA	439	Cytoplasmic	TIGR02643;TIGR02644;	122	Purines, pyrimidines, nucleosides, and nucleotides	Other	pyrimidine nucleobase metabolic process [GO:0006206]; thymidine metabolic process [GO:0046104]	phosphorylase activity [GO:0004645]; pyrimidine-nucleoside phosphorylase activity [GO:0016154]; thymidine phosphorylase activity [GO:0009032]		IPR000312;IPR017459;IPR013102;IPR018090;IPR017872;IPR000053;IPR013465	Glycosyl_Trfase_fam3;Glycosyl_Trfase_fam3_N_dom;PYNP_C;Pyrmidine_PPas_bac/euk;Pyrmidine_PPase_CS;Thymidine/pyrmidine_PPase;Thymidine_Pase	ko00240;ko00983;ko05219
*	RCAP_rcc00446	D5AMS2	Phosphopentomutase (EC 5.4.2.7) (Phosphodeoxyribomutase)	deoB	403	Cytoplasmic	TIGR01696;	122	Purines, pyrimidines, nucleosides, and nucleotides	Other	5-phosphoribose 1-diphosphate biosynthetic process [GO:0006015]; cellular metabolic compound salvage [GO:0043094]; deoxyribonucleotide catabolic process [GO:0009264]	magnesium ion binding [GO:0000287]; manganese ion binding [GO:0030145]; phosphopentomutase activity [GO:0008973]	cytoplasm [GO:0005737]	IPR017849;IPR017850;IPR010045;IPR006124;IPR024052	Alkaline_Pase-like_a/b/a;Alkaline_phosphatase_core;DeoB;Metalloenzyme;Phosphopentomutase_DeoB_cap	ko00030;ko00230
*	RCAP_rcc00447	D5AMS3	Uracil phosphoribosyltransferase (EC 2.4.2.9) (UMP pyrophosphorylase) (UPRTase)	upp	210	Cytoplasmic	TIGR01091;	127	Purines, pyrimidines, nucleosides, and nucleotides	Salvage of nucleosides and nucleotides	nucleoside metabolic process [GO:0009116]; UMP salvage [GO:0044206]; uracil salvage [GO:0006223]	GTP binding [GO:0005525]; magnesium ion binding [GO:0000287]; uracil phosphoribosyltransferase activity [GO:0004845]		IPR029057;IPR005765	PRTase-like;Ura_phspho_trans	ko00240
*	RCAP_rcc00448	D5AMS4	Sporulation domain protein	RCAP_rcc00448	522	Unknown						peptidoglycan binding [GO:0042834]		IPR007730	Sporulation-related_dom
*	RCAP_rcc00449	D5AMS5	Uncharacterized protein	RCAP_rcc00449	341	Cytoplasmic							integral component of membrane [GO:0016021]
	RCAP_rcc00450	D5AMS6	Uncharacterized protein	RCAP_rcc00450	299	Cytoplasmic Membrane							integral component of membrane [GO:0016021]	IPR000620	EamA_dom
	RCAP_rcc00451	D5AMS7	Uncharacterized protein	RCAP_rcc00451	215	Unknown						sulfotransferase activity [GO:0008146]	integral component of membrane [GO:0016021]	IPR027417;IPR005331	P-loop_NTPase;Sulfotransferase
*	RCAP_rcc00452	D5AMS8	Amino acid ABC transporter, permease protein	RCAP_rcc00452	262	Cytoplasmic Membrane	TIGR01726;	142	Transport and binding proteins	Amino acids, peptides and amines	nitrogen compound transport [GO:0071705]	transmembrane transporter activity [GO:0022857]	ATP-binding cassette (ABC) transporter complex [GO:0043190]	IPR010065;IPR000515	AA_ABC_transptr_permease_3TM;MetI-like
*	RCAP_rcc00453	D5AMS9	Amino acid ABC transporter, periplasmic amino acid-binding protein	RCAP_rcc00453	258	Periplasmic						ionotropic glutamate receptor activity [GO:0004970]	membrane [GO:0016020]	IPR001638	Solute-binding_3/MltF_N
*	RCAP_rcc00454	D5AMT0	Molybdenum cofactor biosynthesis protein B-1	moeB1	342	Cytoplasmic Membrane						ubiquitin-like modifier activating enzyme activity [GO:0008641]	integral component of membrane [GO:0016021]	IPR007901;IPR009036;IPR016040;IPR000594	MoeZ_MoeB;Molybdenum_cofac_synth_MoeB;NAD(P)-bd_dom;ThiF_NAD_FAD-bd
*	RCAP_rcc00455	D5AMT1	Deoxyuridine 5'-triphosphate nucleotidohydrolase (dUTPase) (EC 3.6.1.23) (dUTP pyrophosphatase)	dut	155	Unknown	TIGR00576;	123	Purines, pyrimidines, nucleosides, and nucleotides	2'-Deoxyribonucleotide metabolism	dUMP biosynthetic process [GO:0006226]; dUTP metabolic process [GO:0046080]	dUTP diphosphatase activity [GO:0004170]; magnesium ion binding [GO:0000287]		IPR029054;IPR008180;IPR008181	dUTPase-like;dUTPase/dCTP_deaminase;dUTPase_1	ko00240
*	RCAP_rcc00456	D5AMT2	Coenzyme A biosynthesis bifunctional protein CoaBC (EC 4.1.1.36) (EC 6.3.2.5) (DNA/pantothenate metabolism flavoprotein)	coaBC	398	Cytoplasmic	TIGR00521;	83	Biosynthesis of cofactors, prosthetic groups, and carriers	Pantothenate and coenzyme A	coenzyme A biosynthetic process [GO:0015937]; pantothenate catabolic process [GO:0015941]	FMN binding [GO:0010181]; phosphopantothenate--cysteine ligase activity [GO:0004632]; phosphopantothenoylcysteine decarboxylase activity [GO:0004633]		IPR005252;IPR007085;IPR003382	CoaBC;DNA/pantothenate-metab_flavo_C;Flavoprotein	ko00770
*	RCAP_rcc00457	D5AMT3	Uncharacterized protein	RCAP_rcc00457	269	Unknown								IPR007314	DUF399
*	RCAP_rcc00458	D5AMT4	RNA polymerase sigma-32 factor-1	rpoH1	292	Cytoplasmic	TIGR02937;	179	Central intermediary metabolism	Nitrogen fixation	DNA-templated transcription, initiation [GO:0006352]	DNA binding [GO:0003677]; DNA-binding transcription factor activity [GO:0003700]; sigma factor activity [GO:0016987]		IPR014284;IPR000943;IPR007627;IPR007630;IPR016263;IPR013325;IPR013324;IPR011991	RNA_pol_sigma-70_dom;RNA_pol_sigma70;RNA_pol_sigma70_r2;RNA_pol_sigma70_r4;RNA_pol_sigma_factor;RNA_pol_sigma_r2;RNA_pol_sigma_r3_r4;WHTH_DNA-bd_dom	ko03020
*	RCAP_rcc00459	D5AMT5	Glutathione S-transferase family protein	RCAP_rcc00459	228	Unknown						transferase activity [GO:0016740]		IPR010987;IPR004045;IPR012336	Glutathione-S-Trfase_C-like;Glutathione_S-Trfase_N;Thioredoxin-like_fold	ko00480
*	RCAP_rcc00460	D5AMT6	Competence protein ComM	comM	504	Cytoplasmic	TIGR00368;	157	Unknown function	General	DNA replication initiation [GO:0006270]	ATP binding [GO:0005524]; DNA binding [GO:0003677]		IPR003593;IPR001208;IPR004482;IPR025158;IPR000523;IPR027417;IPR020568;IPR014721	AAA+_ATPase;MCM_DNA-dep_ATPase;Mg_chelat-rel;Mg_chelat-rel_C;Mg_chelatse_chII;P-loop_NTPase;Ribosomal_S5_D2-typ_fold;Ribosomal_S5_D2-typ_fold_subgr
*	RCAP_rcc00461	D5AMT7	Esterase (EC 3.1.1.-)	est	307	Cytoplasmic						hydrolase activity [GO:0016787]		IPR029058;IPR013094;IPR002168	AB_hydrolase;AB_hydrolase_3;Lipase_GDXG_AS
*	RCAP_rcc00462	D5AMT8	Glutathione synthetase (EC 6.3.2.3) (GSH synthetase) (GSH-S) (GSHase) (Glutathione synthase)	gshB	314	Cytoplasmic	TIGR01380;	86	Biosynthesis of cofactors, prosthetic groups, and carriers	Glutathione and analogs		ATP binding [GO:0005524]; glutathione synthase activity [GO:0004363]; metal ion binding [GO:0046872]		IPR011761;IPR013815;IPR013816;IPR006284;IPR004218;IPR004215;IPR016185	ATP-grasp;ATP_grasp_subdomain_1;ATP_grasp_subdomain_2;Glut_synth_pro;GSHS_ATP-bd;GSHS_N;PreATP-grasp_dom	ko00480
	RCAP_rcc00463	D5AMT9	UPF0102 protein RCAP_rcc00463	RCAP_rcc00463	119	Cytoplasmic						nuclease activity [GO:0004518]; nucleic acid binding [GO:0003676]		IPR011335;IPR011856;IPR003509	Restrct_endonuc-II-like;tRNA_endonuc-like_dom;UPF0102
*	RCAP_rcc00464	D5AMU0	Ribosomal RNA small subunit methyltransferase I (EC 2.1.1.198) (16S rRNA 2'-O-ribose C1402 methyltransferase) (rRNA (cytidine-2'-O-)-methyltransferase RsmI)	rsmI	302	Cytoplasmic	TIGR00096;	168	Protein synthesis	tRNA and rRNA base modification	enzyme-directed rRNA 2'-O-methylation [GO:0000453]	rRNA (cytosine-2'-O-)-methyltransferase activity [GO:0070677]	cytoplasm [GO:0005737]	IPR000878;IPR014777;IPR014776;IPR008189	4pyrrol_Mease;4pyrrole_Mease_sub1;4pyrrole_Mease_sub2;rRNA_ssu_MeTfrase_I
*	RCAP_rcc00465	D5AMU1	Extracellular ligand-binding receptor family protein	RCAP_rcc00465	391	Unknown								IPR028081;IPR028082	Leu-bd;Peripla_BP_I
*	RCAP_rcc00466	D5AMU2	Bifunctional uridylyltransferase/uridylyl-removing enzyme (UTase/UR) (Bifunctional [protein-PII] modification enzyme) (Bifunctional nitrogen sensor protein) [Includes: [Protein-PII] uridylyltransferase (PII uridylyltransferase) (UTase) (EC 2.7.7.59); [Protein-PII]-UMP uridylyl-removing enzyme (UR) (EC 3.1.4.-)]	glnD	920	Cytoplasmic	TIGR01693;	160	Central intermediary metabolism	Nitrogen metabolism	nitrogen fixation [GO:0009399]; regulation of nitrogen utilization [GO:0006808]	[protein-PII] uridylyltransferase activity [GO:0008773]; phosphoric diester hydrolase activity [GO:0008081]		IPR002912;IPR003607;IPR006674;IPR013546;IPR010043	ACT_dom;HD/PDEase_dom;HD_domain;PII_UdlTrfase/GS_AdlTrfase;UTase/UR	ko02020
*	RCAP_rcc00467	D5AMU3	Probable lipid II flippase MurJ	mviN	515	Cytoplasmic Membrane	TIGR01695;	89	Cell envelope	Biosynthesis and degradation of murein sacculus and peptidoglycan	cell wall organization [GO:0071555]; peptidoglycan biosynthetic process [GO:0009252]; regulation of cell shape [GO:0008360]	lipid-linked peptidoglycan transporter activity [GO:0015648]	integral component of plasma membrane [GO:0005887]	IPR004268	MurJ	ko00550
*	RCAP_rcc00468	D5AMU4	Rhomboid family protein	RCAP_rcc00468	227	Cytoplasmic Membrane						serine-type endopeptidase activity [GO:0004252]	integral component of membrane [GO:0016021]	IPR022764	Peptidase_S54_rhomboid_dom
*	RCAP_rcc00469	D5AMU5	Tryptophan--tRNA ligase (EC 6.1.1.2) (Tryptophanyl-tRNA synthetase) (TrpRS)	trpS	350	Cytoplasmic	TIGR00233;	137	Protein synthesis	tRNA aminoacylation	tryptophanyl-tRNA aminoacylation [GO:0006436]	ATP binding [GO:0005524]; tryptophan-tRNA ligase activity [GO:0004830]	cytoplasm [GO:0005737]	IPR001412;IPR002305;IPR014729;IPR002306;IPR024109	aa-tRNA-synth_I_CS;aa-tRNA-synth_Ic;Rossmann-like_a/b/a_fold;Trp-tRNA-ligase;Trp-tRNA-ligase_bac-type	ko00380;ko00970
	RCAP_rcc00470	D5AMU6	MATE efflux family protein	RCAP_rcc00470	441	Cytoplasmic Membrane	TIGR00797;	147	Transport and binding proteins	Other		antiporter activity [GO:0015297]; drug transmembrane transporter activity [GO:0015238]	integral component of membrane [GO:0016021]	IPR002528	MATE
*	RCAP_rcc00471	D5AMU7	Thioesterase superfamily protein	RCAP_rcc00471	168	Unknown								IPR029069;IPR006683	HotDog_dom;Thioestr_supf
*	RCAP_rcc00472	D5AMU8	Thioesterase superfamily protein	RCAP_rcc00472	145	Cytoplasmic	TIGR00369;	157	Unknown function	General				IPR029069;IPR003736;IPR006683	HotDog_dom;PAAI_dom;Thioestr_supf
*	RCAP_rcc00473	D5AMU9	Transcriptional regulator, MerR family	RCAP_rcc00473	122	Cytoplasmic					regulation of transcription, DNA-templated [GO:0006355]	DNA binding [GO:0003677]		IPR009061;IPR000551;IPR015358	DNA-bd_dom_put;MerR-type_HTH_dom;Tscrpt_reg_MerR_DNA-bd
*	RCAP_rcc00474	D5AMV0	Transcriptional regulator, MerR family	RCAP_rcc00474	127	Cytoplasmic					regulation of transcription, DNA-templated [GO:0006355]	DNA binding [GO:0003677]		IPR009061;IPR000551	DNA-bd_dom_put;MerR-type_HTH_dom
*	RCAP_rcc00475	D5AMV1	Acyl-CoA dehydrogenase domain protein	RCAP_rcc00475	591	Cytoplasmic						flavin adenine dinucleotide binding [GO:0050660]; oxidoreductase activity, acting on the CH-CH group of donors [GO:0016627]		IPR025878;IPR020953;IPR006091;IPR009075;IPR013786;IPR009100	Acyl-CoA_dh_like_C_dom;Acyl-CoA_DH_N_bac;Acyl-CoA_Oxase/DH_cen-dom;AcylCo_DH/oxidase_C;AcylCoA_DH/ox_N;AcylCoA_DH/oxidase_NM_dom
*	RCAP_rcc00476	D5AMV2	Uncharacterized protein	RCAP_rcc00476	278	Cytoplasmic								IPR010421	DUF1013
	RCAP_rcc00477	D5AMV3	Ribonuclease T2 family protein (EC 3.1.27.1)	RCAP_rcc00477	211	Periplasmic						ribonuclease T2 activity [GO:0033897]; RNA binding [GO:0003723]		IPR001568;IPR018188	RNase_T2-like;RNase_T2_AS
*	RCAP_rcc00478	D5AMV4	Alcohol dehydrogenase, zinc-binding domain protein (EC 1.1.1.-)	RCAP_rcc00478	329	Cytoplasmic Membrane	TIGR02824;	703	Unknown function	Enzymes of unknown specificity		oxidoreductase activity [GO:0016491]		IPR013149;IPR013154;IPR002085;IPR011032;IPR016040;IPR014189	ADH_C;ADH_GroES-like;ADH_SF_Zn-type;GroES-like;NAD(P)-bd_dom;Quinone_OxRdtase_PIG3
*	RCAP_rcc00479	D5AMV5	Ubiquinone biosynthesis protein, COQ9 family	RCAP_rcc00479	226	Unknown	TIGR02396;	157	Unknown function	General	ubiquinone biosynthetic process [GO:0006744]			IPR013718;IPR012762	COQ9;Ubiq_biosynth_COQ9
*	RCAP_rcc00480	D5AMV6	30S ribosomal protein S21	rpsU	68	Unknown	TIGR00030;	158	Protein synthesis	Ribosomal proteins: synthesis and modification	translation [GO:0006412]	structural constituent of ribosome [GO:0003735]	ribosome [GO:0005840]	IPR001911;IPR018278	Ribosomal_S21;Ribosomal_S21_CS	ko03010
*	RCAP_rcc00481	D5AMV7	Methyl-accepting chemotaxis protein McpI	mcpI	642	Cytoplasmic Membrane					chemotaxis [GO:0006935]; signal transduction [GO:0007165]	transmembrane signaling receptor activity [GO:0004888]	integral component of membrane [GO:0016021]	IPR004090;IPR003660;IPR004089	Chemotax_Me-accpt_rcpt;HAMP_linker_domain;MCPsignal_dom	ko02020;ko02030
	RCAP_rcc00482	D5AMV8	Uncharacterized protein	RCAP_rcc00482	96	Unknown
*	RCAP_rcc00483	D5AMV9	Transcriptional regulator, AsnC/Lrp family	RCAP_rcc00483	152	Cytoplasmic						DNA-binding transcription factor activity [GO:0003700]; sequence-specific DNA binding [GO:0043565]		IPR000485;IPR011008;IPR019888;IPR019887;IPR019885;IPR011991	AsnC-type_HTH_dom;Dimeric_a/b-barrel;Tscrpt_reg_AsnC-typ;Tscrpt_reg_AsnC-typ_C;Tscrpt_reg_HTH_AsnC-type_CS;WHTH_DNA-bd_dom
*	RCAP_rcc00484	D5AMW0	Alanine dehydrogenase (EC 1.4.1.1)	ald	372	Unknown	TIGR00518;	109	Energy metabolism	Amino acids and amines	L-alanine catabolic process [GO:0042853]	alanine dehydrogenase activity [GO:0000286]; nucleotide binding [GO:0000166]		IPR008141;IPR008143;IPR007886;IPR007698;IPR016040	Ala_DH;Ala_DH/PNT_CS2;AlaDH/PNT_N;AlaDH/PNT_NAD(H)-bd;NAD(P)-bd_dom	ko00250;ko00430
*	RCAP_rcc00485	D5AMW1	Glutathione S-transferase (EC 2.5.1.18)	gst	233	Cytoplasmic						glutathione transferase activity [GO:0004364]		IPR010987;IPR004045;IPR004046;IPR012336	Glutathione-S-Trfase_C-like;Glutathione_S-Trfase_N;GST_C;Thioredoxin-like_fold	ko00480;ko00980;ko00982
	RCAP_rcc00486	D5AMW2	Conserved domain protein	RCAP_rcc00486	217	Cytoplasmic
*	RCAP_rcc00487	D5AMW3	Inositol-1-monophosphatase (EC 3.1.3.25)	suhB	263	Cytoplasmic					inositol phosphate dephosphorylation [GO:0046855]; phosphatidylinositol phosphorylation [GO:0046854]	inositol monophosphate 1-phosphatase activity [GO:0008934]; inositol monophosphate 3-phosphatase activity [GO:0052832]; inositol monophosphate 4-phosphatase activity [GO:0052833]; metal ion binding [GO:0046872]		IPR020583;IPR000760;IPR020550;IPR022337	Inositol_monoP_metal-BS;Inositol_monophosphatase;Inositol_monophosphatase_CS;Inositol_monophosphatase_SuhB	ko00521;ko00562;ko04070
	RCAP_rcc00488	D5AMW4	Fosmidomycin resistance protein	fsr	398	Cytoplasmic Membrane					transmembrane transport [GO:0055085]		integral component of membrane [GO:0016021]	IPR011701;IPR020846	MFS;MFS_dom
	RCAP_rcc00489	D5AMW5	Transcriptional regulator, LysR family	RCAP_rcc00489	301	Cytoplasmic						DNA binding [GO:0003677]; DNA-binding transcription factor activity [GO:0003700]		IPR005119;IPR000847;IPR011991	LysR_subst-bd;Tscrpt_reg_HTH_LysR;WHTH_DNA-bd_dom
*	RCAP_rcc00490	D5AMW6	Methylenetetrahydrofolate reductase (EC 1.5.1.20)	metF	288	Cytoplasmic	TIGR00676;	71	Amino acid biosynthesis	Aspartate family	methionine biosynthetic process [GO:0009086]; tetrahydrofolate interconversion [GO:0035999]	methylenetetrahydrofolate reductase (NAD(P)H) activity [GO:0004489]	cytosol [GO:0005829]	IPR029041;IPR003171;IPR004620	FAD-linked_oxidoreductase-like;Mehydrof_redctse;MTHF_reductase_bac	ko00670;ko00680;ko00720
*	RCAP_rcc00491	D5AMW7	Thioesterase superfamily protein	RCAP_rcc00491	164	Cytoplasmic	TIGR00369;	157	Unknown function	General				IPR029069;IPR003736;IPR006683	HotDog_dom;PAAI_dom;Thioestr_supf
	RCAP_rcc00492	D5AMW8	Uncharacterized protein	RCAP_rcc00492	382	Unknown								IPR029058;IPR018712	AB_hydrolase;DUF2235
	RCAP_rcc00493	D5AMW9	Lysine/ornithine decarboxylase (EC 4.1.1.17) (EC 4.1.1.18)	ldc	381	Cytoplasmic					polyamine biosynthetic process [GO:0006596]	lysine decarboxylase activity [GO:0008923]; ornithine decarboxylase activity [GO:0004586]		IPR009006;IPR022643;IPR022644;IPR022653;IPR000183;IPR002433;IPR029066	Ala_racemase/Decarboxylase_C;De-COase2_C;De-COase2_N;De-COase2_pyr-phos_BS;Orn/DAP/Arg_de-COase;Orn_de-COase;PLP-binding_barrel	ko00330;ko00480
*	RCAP_rcc00494	D5AMX0	Transcriptional regulator, AsnC/Lrp family	RCAP_rcc00494	143	Cytoplasmic						DNA-binding transcription factor activity [GO:0003700]; sequence-specific DNA binding [GO:0043565]		IPR000485;IPR011008;IPR019888;IPR019887;IPR011991	AsnC-type_HTH_dom;Dimeric_a/b-barrel;Tscrpt_reg_AsnC-typ;Tscrpt_reg_AsnC-typ_C;WHTH_DNA-bd_dom
*	RCAP_rcc00495	D5AMX1	Glyoxalase/bleomycin resistance protein/dioxygenase	RCAP_rcc00495	256	Unknown						dioxygenase activity [GO:0051213]		IPR029068;IPR025870	Glyas_Bleomycin-R_OHBP_Dase;Glyoxalase-like_dom
*	RCAP_rcc00496	D5AMX2	Valine--tRNA ligase (EC 6.1.1.9) (Valyl-tRNA synthetase) (ValRS)	valS	1017	Cytoplasmic	TIGR00422;	137	Protein synthesis	tRNA aminoacylation	valyl-tRNA aminoacylation [GO:0006438]	aminoacyl-tRNA editing activity [GO:0002161]; ATP binding [GO:0005524]; valine-tRNA ligase activity [GO:0004832]	cytoplasm [GO:0005737]	IPR001412;IPR002300;IPR013155;IPR014729;IPR010978;IPR009080;IPR019499;IPR009008;IPR002303	aa-tRNA-synth_I_CS;aa-tRNA-synth_Ia;M/V/L/I-tRNA-synth_anticd-bd;Rossmann-like_a/b/a_fold;tRNA-bd_arm;tRNAsynth_1a_anticodon-bd;Val-tRNA_synth_tRNA-bd;Val/Leu/Ile-tRNA-synth_edit;Valyl-tRNA_ligase	ko00290;ko00970
*	RCAP_rcc00497	D5AMX3	UbiA prenyltransferase family protein (EC 2.5.1.-)	RCAP_rcc00497	479	Cytoplasmic Membrane						transferase activity, transferring alkyl or aryl (other than methyl) groups [GO:0016765]	integral component of membrane [GO:0016021]	IPR023214;IPR000537	HAD-like_dom;UbiA_prenyltransferase
	RCAP_rcc00498	D5AMX4	Transglycosylase, Slt family (EC 3.2.1.-)	RCAP_rcc00498	291	Unknown					peptidoglycan metabolic process [GO:0000270]	hydrolase activity, acting on glycosyl bonds [GO:0016798]; lytic transglycosylase activity [GO:0008933]	membrane [GO:0016020]	IPR023346;IPR008258;IPR000189	Lysozyme-like_dom;TGlycosylase-like_SLT;Transglyc_AS
*	RCAP_rcc00499	D5AMX5	Uncharacterized protein	RCAP_rcc00499	64	Unknown							integral component of membrane [GO:0016021]
	RCAP_rcc00500	D5AMX6	Uncharacterized protein	RCAP_rcc00500	67	Cytoplasmic Membrane							integral component of membrane [GO:0016021]
*	RCAP_rcc00501	D5AMX7	Flp pilus assembly protein CpaB	cpaB	291	Unknown	TIGR03177;	160	Central intermediary metabolism	Nitrogen metabolism				IPR017592;IPR013974	Pilus_assmbl_Flp-typ_CpaB;SAF
*	RCAP_rcc00502	D5AMX8	Type II and III secretion system protein	RCAP_rcc00502	469	Outer Membrane					protein secretion [GO:0009306]			IPR007055;IPR001775;IPR004846	BON_dom;GspD/PilQ;T2SS/T3SS
*	RCAP_rcc00503	D5AMX9	OmpA/MotB domain protein	RCAP_rcc00503	223	Outer Membrane							cell outer membrane [GO:0009279]; integral component of membrane [GO:0016021]	IPR006664;IPR006665	OMP_bac;OmpA/MotB_C
*	RCAP_rcc00504	D5AMY0	ATPase, PP-loop family	RCAP_rcc00504	421	Cytoplasmic Membrane								IPR025669;IPR027417	AAA_dom;P-loop_NTPase
*	RCAP_rcc00505	D5AMY1	Type II secretion system protein E	RCAP_rcc00505	486	Unknown								IPR027417;IPR001482	P-loop_NTPase;T2SS_protein-E
	RCAP_rcc00506	D5AMY2	Type II secretion system protein	RCAP_rcc00506	322	Cytoplasmic Membrane							integral component of membrane [GO:0016021]	IPR018076	T2SS_F
*	RCAP_rcc00507	D5AMY3	Type II secretion system protein	RCAP_rcc00507	337	Cytoplasmic Membrane							integral component of membrane [GO:0016021]	IPR018076	T2SS_F
*	RCAP_rcc00508	D5AMY4	TPR repeat domain protein	RCAP_rcc00508	187	Unknown								IPR013026;IPR011990;IPR019734	TPR-contain_dom;TPR-like_helical_dom;TPR_repeat
*	RCAP_rcc00509	D5AMY5	TPR repeat domain protein	RCAP_rcc00509	286	Unknown								IPR013026;IPR011990	TPR-contain_dom;TPR-like_helical_dom
	RCAP_rcc00510	D5AMY6	Peptidase, subfamily A24A, prepilin type IV (EC 3.4.23.-)	RCAP_rcc00510	167	Cytoplasmic Membrane						aspartic-type endopeptidase activity [GO:0004190]	integral component of membrane [GO:0016021]	IPR000045	Prepilin_IV_endopep_pep
*	RCAP_rcc00511	D5AMY7	4-diphosphocytidyl-2-C-methyl-D-erythritol kinase (CMK) (EC 2.7.1.148) (4-(cytidine-5'-diphospho)-2-C-methyl-D-erythritol kinase)	ispE	286	Unknown					isopentenyl diphosphate biosynthetic process, methylerythritol 4-phosphate pathway [GO:0019288]; terpenoid biosynthetic process [GO:0016114]	4-(cytidine 5'-diphospho)-2-C-methyl-D-erythritol kinase activity [GO:0050515]; ATP binding [GO:0005524]		IPR013750;IPR006204;IPR004424;IPR020568;IPR014721	GHMP_kinase_C_dom;GHMP_kinase_N_dom;IspE;Ribosomal_S5_D2-typ_fold;Ribosomal_S5_D2-typ_fold_subgr	ko00900
*	RCAP_rcc00512	D5AMY8	TPR repeat domain protein	RCAP_rcc00512	572	Unknown								IPR013026;IPR011990;IPR019734	TPR-contain_dom;TPR-like_helical_dom;TPR_repeat
*	RCAP_rcc00513	D5AMY9	Electron transfer flavoprotein-ubiquinone oxidoreductase (EC 1.5.5.1)	etfD	553	Unknown						electron-transferring-flavoprotein dehydrogenase activity [GO:0004174]		IPR007859;IPR003042	ETFD_OxRdtase;Rng_hydrolase-like
*	RCAP_rcc00514	D5AMZ0	Transcription elongation factor GreA (Transcript cleavage factor GreA)	greA	156	Cytoplasmic	TIGR01462;	165	Transcription	Transcription factors	regulation of DNA-templated transcription, elongation [GO:0032784]	DNA binding [GO:0003677]; RNA polymerase binding [GO:0070063]; translation elongation factor activity [GO:0003746]		IPR018151;IPR006359;IPR028624;IPR001437;IPR023459;IPR022691	TF_GreA/GreB_CS;Tscrpt_elong_fac_GreA;Tscrpt_elong_fac_GreA/B;Tscrpt_elong_fac_GreA/B_C;Tscrpt_elong_fac_GreA/B_fam;Tscrpt_elong_fac_GreA/B_N
*	RCAP_rcc00515	D5AMZ1	Uncharacterized protein	RCAP_rcc00515	345	Cytoplasmic Membrane							integral component of membrane [GO:0016021]
*	RCAP_rcc00516	D5AMZ2	Tyrosine phenol-lyase (EC 4.1.99.2)	tpl	481	Cytoplasmic					aromatic amino acid family metabolic process [GO:0009072]	tyrosine phenol-lyase activity [GO:0050371]		IPR001597;IPR011166;IPR015424;IPR015421;IPR015422	ArAA_b-elim_lyase/Thr_aldolase;Beta-eliminating_lyase;PyrdxlP-dep_Trfase;PyrdxlP-dep_Trfase_major_sub1;PyrdxlP-dep_Trfase_major_sub2	ko00380;ko00910
*	RCAP_rcc00517	D5AMZ3	Uncharacterized protein	RCAP_rcc00517	70	Unknown
*	RCAP_rcc00518	D5AMZ4	Fatty acid oxidation complex, beta subunit (EC 2.3.1.16)	fadA	403	Cytoplasmic	TIGR01930;	121	Fatty acid and phospholipid metabolism	Other		acetyl-CoA C-acyltransferase activity [GO:0003988]		IPR002155;IPR016039;IPR016038;IPR020615;IPR020610;IPR020617;IPR020613;IPR020616	Thiolase;Thiolase-like;Thiolase-like_subgr;Thiolase_acyl_enz_int_AS;Thiolase_AS;Thiolase_C;Thiolase_CS;Thiolase_N	ko00071;ko00072;ko00280;ko00310;ko00362;ko00380;ko00620;ko00630;ko00640;ko00650;ko00720;ko00900;ko02020
	RCAP_rcc00519	D5AMZ5	Cupin domain protein	RCAP_rcc00519	165	Cytoplasmic								IPR013096;IPR014710;IPR011051	Cupin_2;RmlC-like_jellyroll;RmlC_Cupin
*	RCAP_rcc00520	D5AMZ6	Fatty acid oxidation complex, alpha subunit (EC 1.1.1.35) (EC 4.2.1.17) (EC 5.1.2.3)	fadB	728	Cytoplasmic					fatty acid beta-oxidation [GO:0006635]	3-hydroxyacyl-CoA dehydrogenase activity [GO:0003857]; 3-hydroxybutyryl-CoA epimerase activity [GO:0008692]; enoyl-CoA hydratase activity [GO:0004300]		IPR006176;IPR006108;IPR008927;IPR013328;IPR029045;IPR001753;IPR016040	3-OHacyl-CoA_DH_NAD-bd;3HC_DH_C;6-PGluconate_DH_C-like;6PGD_dom_2;ClpP/crotonase-like_dom;Crotonase_core_superfam;NAD(P)-bd_dom	ko00071;ko00280;ko00281;ko00310;ko00380;ko00410;ko00640;ko00650;ko00720;ko00903;ko00930;ko01040
*	RCAP_rcc00521	D5AMZ7	Peptidyl-dipeptidase Dcp (EC 3.4.15.5)	dcp	671	Cytoplasmic						carboxypeptidase activity [GO:0004180]; metal ion binding [GO:0046872]; metalloendopeptidase activity [GO:0004222]		IPR024079;IPR024077;IPR024080;IPR001567	MetalloPept_cat_dom;Neurolysin/TOP_dom2;Neurolysin/TOP_N;Pept_M3A_M3B
*	RCAP_rcc00522	D5AMZ8	Ferrous-iron efflux pump FieF	fieF	293	Cytoplasmic Membrane	TIGR01297;	145	Transport and binding proteins	Cations and iron carrying compounds		cation transmembrane transporter activity [GO:0008324]	integral component of membrane [GO:0016021]; plasma membrane [GO:0005886]	IPR002524;IPR027470;IPR027469	Cation_efflux;Cation_efflux_CTD;Cation_efflux_TMD
*	RCAP_rcc00523	D5AMZ9	Uncharacterized protein	RCAP_rcc00523	206	Unknown								IPR010466	DUF1058
*	RCAP_rcc00524	D5AN00	Glyoxylate reductase-1 (EC 1.1.1.26)	gyaR1	328	Cytoplasmic						glyoxylate reductase activity [GO:0047964]; NAD binding [GO:0051287]		IPR006139;IPR029753;IPR029752;IPR006140;IPR016040	D-isomer_2_OHA_DH_cat_dom;D-isomer_DH_CS;D-isomer_DH_CS1;D-isomer_DH_NAD-bd;NAD(P)-bd_dom	ko00630
*	RCAP_rcc00525	D5AN01	Uncharacterized protein	RCAP_rcc00525	212	Unknown
*	RCAP_rcc00526	D5AN02	Dimethylglycine dehydrogenase (EC 1.5.8.4)	RCAP_rcc00526	832	Cytoplasmic						dimethylglycine dehydrogenase activity [GO:0047865]		IPR006076;IPR013977;IPR006222;IPR029043;IPR027266	FAD-dep_OxRdtase;GCV_T_C;GCV_T_N;GcvT/YgfZ_C;TrmE/GcvT_dom1	ko00260
*	RCAP_rcc00527	D5AN03	Glycosyl hydrolase, family 25	RCAP_rcc00527	279	Unknown					cell wall macromolecule catabolic process [GO:0016998]; peptidoglycan catabolic process [GO:0009253]	lysozyme activity [GO:0003796]		IPR002053;IPR013781;IPR018077;IPR017853	Glyco_hydro_25;Glyco_hydro_catalytic_dom;Glyco_hydro_fam25_subgr;Glycoside_hydrolase_SF
*	RCAP_rcc00528	D5AN04	Alkyl hydroperoxide reductase AhpD (EC 1.11.1.15)	RCAP_rcc00528	120	Unknown	TIGR00778;	157	Unknown function	General		lyase activity [GO:0016829]; peroxidase activity [GO:0004601]; peroxiredoxin activity [GO:0051920]		IPR029032;IPR004675;IPR003779	AhpD-like;AhpD_core;CMD-like
*	RCAP_rcc00529	D5AN05	FAD dependent oxidoreductase	RCAP_rcc00529	357	Unknown						oxidoreductase activity [GO:0016491]		IPR006076	FAD-dep_OxRdtase
*	RCAP_rcc00530	D5AN06	Uncharacterized protein	RCAP_rcc00530	235	Unknown								IPR027385;IPR023614	OMP_b-brl;Porin_dom
*	RCAP_rcc00531	D5AN07	Carbamoyl-phosphate synthase large chain (EC 6.3.5.5) (Carbamoyl-phosphate synthetase ammonia chain)	carB	1110	Unknown	TIGR01369;	126	Purines, pyrimidines, nucleosides, and nucleotides	Pyrimidine ribonucleotide biosynthesis	'de novo' UMP biosynthetic process [GO:0044205]; arginine biosynthetic process [GO:0006526]	ATP binding [GO:0005524]; carbamoyl-phosphate synthase (glutamine-hydrolyzing) activity [GO:0004088]; metal ion binding [GO:0046872]		IPR011761;IPR013815;IPR013816;IPR006275;IPR005481;IPR005480;IPR005479;IPR005483;IPR011607;IPR016185	ATP-grasp;ATP_grasp_subdomain_1;ATP_grasp_subdomain_2;CarbamoylP_synth_lsu;CarbamoylP_synth_lsu_N;CarbamoylP_synth_lsu_oligo;CbamoylP_synth_lsu-like_ATP-bd;CbamoylP_synth_lsu_CPSase_dom;MGS-like_dom;PreATP-grasp_dom	ko00240;ko00250
*	RCAP_rcc00532	D5AN08	Aspartate--tRNA(Asp/Asn) ligase (EC 6.1.1.23) (Aspartyl-tRNA synthetase) (AspRS) (Non-discriminating aspartyl-tRNA synthetase) (ND-AspRS)	aspS	593	Cytoplasmic	TIGR00459;	137	Protein synthesis	tRNA aminoacylation	aspartyl-tRNA aminoacylation [GO:0006422]	aspartate-tRNA(Asn) ligase activity [GO:0050560]; aspartate-tRNA ligase activity [GO:0004815]; ATP binding [GO:0005524]; nucleic acid binding [GO:0003676]	cytoplasm [GO:0005737]	IPR004364;IPR018150;IPR006195;IPR004524;IPR002312;IPR004115;IPR029351;IPR012340;IPR004365	aa-tRNA-synt_II;aa-tRNA-synt_II-like;aa-tRNA-synth_II;Asp-tRNA-ligase_bac/mit;Asp/Asn-tRNA-synth_IIb;GAD-like;GAD_dom;NA-bd_OB-fold;NA-bd_OB_tRNA	ko00970
*	RCAP_rcc00533	D5AN09	Uncharacterized protein	RCAP_rcc00533	457	Unknown								IPR014917	DUF1800
*	RCAP_rcc00534	D5AN10	Uncharacterized protein	RCAP_rcc00534	406	Periplasmic								IPR010869;IPR006311	DUF1501;TAT_signal
	RCAP_rcc00535	D5AN11	Membrane protein, putative	RCAP_rcc00535	44	Unknown							integral component of membrane [GO:0016021]
*	RCAP_rcc00536	D5AN12	Acetyltransferase, GNAT family (EC 2.3.1.-)	RCAP_rcc00536	236	Cytoplasmic						transferase activity, transferring acyl groups [GO:0016746]		IPR016181;IPR000182	Acyl_CoA_acyltransferase;GNAT_dom
*	RCAP_rcc00537	D5AN13	Response regulator receiver protein	RCAP_rcc00537	236	Cytoplasmic					phosphorelay signal transduction system [GO:0000160]			IPR011006;IPR001789	CheY-like_superfamily;Sig_transdc_resp-reg_receiver
*	RCAP_rcc00538	D5AN14	Methylmalonyl-CoA epimerase (EC 5.1.99.1)	RCAP_rcc00538	134	Unknown	TIGR03081;	157	Unknown function	General		methylmalonyl-CoA epimerase activity [GO:0004493]		IPR029068;IPR017515	Glyas_Bleomycin-R_OHBP_Dase;MeMalonyl-CoA_epimerase	ko00280;ko00630;ko00640;ko00720
*	RCAP_rcc00539	D5AN15	Uncharacterized protein	RCAP_rcc00539	229	Cytoplasmic Membrane							integral component of membrane [GO:0016021]
*	RCAP_rcc00540	D5AN16	Nitroreductase family protein	RCAP_rcc00540	201	Unknown						oxidoreductase activity [GO:0016491]		IPR029479;IPR000415;IPR026021	Nitroreductase;Nitroreductase-like;YdjA-like
*	RCAP_rcc00541	D5AN17	UPF0235 protein RCAP_rcc00541	RCAP_rcc00541	83	Unknown								IPR003746	DUF167
	RCAP_rcc00542	D5AN18	Membrane protein, putative	RCAP_rcc00542	87	Cytoplasmic Membrane							integral component of membrane [GO:0016021]
*	RCAP_rcc00543	D5ANF4	Uncharacterized protein	RCAP_rcc00543	215	Cytoplasmic Membrane							integral component of membrane [GO:0016021]	IPR011088	Phage_phiNM3_A0EWY4
*	RCAP_rcc00544	D5ANF5	Aldehyde dehydrogenase family protein (EC 1.2.1.-)	RCAP_rcc00544	779	Cytoplasmic						oxidoreductase activity, acting on the aldehyde or oxo group of donors, NAD or NADP as acceptor [GO:0016620]		IPR016161;IPR016163;IPR016162;IPR015590	Ald_DH/histidinol_DH;Ald_DH_C;Ald_DH_N;Aldehyde_DH_dom	ko00010;ko00040;ko00053;ko00071;ko00280;ko00310;ko00330;ko00340;ko00380;ko00410;ko00561;ko00620;ko00625;ko00640;ko00903
*	RCAP_rcc00545	D5ANF6	Deoxyribose-phosphate aldolase (EC 4.1.2.4)	deoC	317	Cytoplasmic	TIGR00126;	122	Purines, pyrimidines, nucleosides, and nucleotides	Other	deoxyribonucleotide catabolic process [GO:0009264]; deoxyribose phosphate catabolic process [GO:0046386]	deoxyribose-phosphate aldolase activity [GO:0004139]	cytoplasm [GO:0005737]	IPR013785;IPR011343;IPR002915	Aldolase_TIM;DeoC;DeoC/FbaB/lacD_aldolase	ko00030
	RCAP_rcc00546	D5ANF7	Uncharacterized protein	RCAP_rcc00546	111	Unknown
*	RCAP_rcc00547	D5ANF8	Glutaredoxin	RCAP_rcc00547	119	Unknown	TIGR00365;	112	Energy metabolism	Electron transport	cell redox homeostasis [GO:0045454]	2 iron, 2 sulfur cluster binding [GO:0051537]; electron transfer activity [GO:0009055]; metal ion binding [GO:0046872]; protein disulfide oxidoreductase activity [GO:0015035]	cell [GO:0005623]	IPR002109;IPR014434;IPR004480;IPR012336	Glutaredoxin;Monothiol_GRX;Monothiol_GRX-rel;Thioredoxin-like_fold
*	RCAP_rcc00548	D5ANF9	BolA family protein	RCAP_rcc00548	79	Unknown								IPR002634	BolA
*	RCAP_rcc00549	D5ANG0	Phosphoribosylformylglycinamidine synthase subunit PurL (FGAM synthase) (EC 6.3.5.3) (Formylglycinamide ribonucleotide amidotransferase subunit II) (FGAR amidotransferase II) (FGAR-AT II) (Glutamine amidotransferase PurL) (Phosphoribosylformylglycinamidine synthase subunit II)	purL	720	Cytoplasmic	TIGR01736;	125	Purines, pyrimidines, nucleosides, and nucleotides	Purine ribonucleotide biosynthesis	'de novo' IMP biosynthetic process [GO:0006189]	ATP binding [GO:0005524]; magnesium ion binding [GO:0000287]; phosphoribosylformylglycinamidine synthase activity [GO:0004642]	cytoplasm [GO:0005737]	IPR010918;IPR000728;IPR010074;IPR016188	AIR_synth_C_dom;AIR_synth_N_dom;PRibForGlyAmidine_synth_PurL;PurM_N-like	ko00230
*	RCAP_rcc00550	D5ANG1	Transcriptional regulator, LysR family	RCAP_rcc00550	302	Cytoplasmic						DNA binding [GO:0003677]; DNA-binding transcription factor activity [GO:0003700]		IPR005119;IPR000847;IPR011991	LysR_subst-bd;Tscrpt_reg_HTH_LysR;WHTH_DNA-bd_dom
*	RCAP_rcc00551	D5ANG2	Glutamate racemase (EC 5.1.1.3)	murI	270	Cytoplasmic					cell wall organization [GO:0071555]; peptidoglycan biosynthetic process [GO:0009252]; regulation of cell shape [GO:0008360]	glutamate racemase activity [GO:0008881]		IPR015942;IPR001920;IPR018187;IPR004391	Asp/Glu/hydantoin_racemase;Asp/Glu_race;Asp/Glu_racemase_AS;Glu_race	ko00471
*	RCAP_rcc00552	D5ANG3	Uncharacterized protein	RCAP_rcc00552	254	Cytoplasmic Membrane							integral component of membrane [GO:0016021]	IPR025640;IPR008523	DUF4339;Phage_LBR48_DUF805
*	RCAP_rcc00553	Q9LA02	N-acetyl-gamma-glutamyl-phosphate reductase (AGPR) (EC 1.2.1.38) (N-acetyl-glutamate semialdehyde dehydrogenase) (NAGSA dehydrogenase)	argC	342	Cytoplasmic	TIGR01850;	73	Amino acid biosynthesis	Glutamate family	arginine biosynthetic process [GO:0006526]	N-acetyl-gamma-glutamyl-phosphate reductase activity [GO:0003942]; NAD binding [GO:0051287]; protein dimerization activity [GO:0046983]	cytoplasm [GO:0005737]	IPR000706;IPR016040;IPR000534;IPR012280	AGPR_type-1;NAD(P)-bd_dom;Semialdehyde_DH_NAD-bd;Semialdhyde_DH_dimer_dom	ko00300;ko00330
*	RCAP_rcc00554	Q9LA01	Cytochrome c-type biogenesis protein CcmE (Cytochrome c maturation protein E) (Heme chaperone CcmE)	ccmE	150	Unknown					cytochrome complex assembly [GO:0017004]; protein-heme linkage [GO:0017003]	heme binding [GO:0020037]; metal ion binding [GO:0046872]	integral component of membrane [GO:0016021]; plasma membrane [GO:0005886]	IPR004329;IPR012340	CcmE;NA-bd_OB-fold
*	RCAP_rcc00555	D5ANG6	Uncharacterized protein	RCAP_rcc00555	203	Unknown								IPR008565;IPR023346;IPR018537	DUF847;Lysozyme-like_dom;Peptidoglycan-bd_3
	RCAP_rcc00556	D5ANG7	Uncharacterized protein	RCAP_rcc00556	164	Cytoplasmic Membrane								IPR021497	DUF3154
*	RCAP_rcc00557	D5ANG8	Methionine--tRNA ligase (EC 6.1.1.10) (Methionyl-tRNA synthetase) (MetRS)	metG	569	Cytoplasmic	TIGR00398;	137	Protein synthesis	tRNA aminoacylation	methionyl-tRNA aminoacylation [GO:0006431]	ATP binding [GO:0005524]; metal ion binding [GO:0046872]; methionine-tRNA ligase activity [GO:0004825]	cytoplasm [GO:0005737]	IPR023458;IPR014758;IPR015413;IPR029038;IPR014729;IPR009080	Met-tRNA_ligase_1;Met-tRNA_synth;Methionyl/Leucyl_tRNA_Synth;MetRS_Zn;Rossmann-like_a/b/a_fold;tRNAsynth_1a_anticodon-bd	ko00450;ko00970
*	RCAP_rcc00558	D5ANG9	Diguanylate cyclase/phosphodiesterase with PAS/PAC sensor (EC 3.1.4.-)	RCAP_rcc00558	558	Cytoplasmic Membrane	TIGR00254;TIGR00229;	264	Regulatory functions	Small molecule interactions	regulation of transcription, DNA-templated [GO:0006355]	hydrolase activity [GO:0016787]		IPR001633;IPR000160;IPR029787;IPR000014;IPR013767	EAL_dom;GGDEF_dom;Nucleotide_cyclase;PAS;PAS_fold
*	RCAP_rcc00559	D5ANH0	Phosphatidylethanolamine N-methyltransferase (EC 2.1.1.17)	pmtA	206	Cytoplasmic						phosphatidylethanolamine N-methyltransferase activity [GO:0004608]		IPR013216;IPR029063	Methyltransf_11;SAM-dependent_MTases	ko00564
*	RCAP_rcc00560	D5ANH1	Molybdenum transport operon repressor MopB	mopB	261	Unknown	TIGR00637;TIGR00638;	129	Regulatory functions	Other	molybdate ion transport [GO:0015689]	DNA-binding transcription factor activity [GO:0003700]; molybdenum ion binding [GO:0030151]		IPR004606;IPR008995;IPR003725;IPR016462;IPR005116;IPR000847;IPR011991	Mo-pterin-bd;Mo/tungstate-bd_C_term_dom;ModE-bd_N;Molybdate-dep_T_reg_ModE;Transp-assoc_OB_typ1;Tscrpt_reg_HTH_LysR;WHTH_DNA-bd_dom
	RCAP_rcc00561	D5ANH2	Molybdenum transport operon repressor MopA	mopA	265	Cytoplasmic	TIGR00637;TIGR00638;	129	Regulatory functions	Other	molybdate ion transport [GO:0015689]	DNA-binding transcription factor activity [GO:0003700]; molybdenum ion binding [GO:0030151]		IPR004606;IPR008995;IPR003725;IPR016462;IPR005116;IPR000847;IPR011991	Mo-pterin-bd;Mo/tungstate-bd_C_term_dom;ModE-bd_N;Molybdate-dep_T_reg_ModE;Transp-assoc_OB_typ1;Tscrpt_reg_HTH_LysR;WHTH_DNA-bd_dom
*	RCAP_rcc00562	D5ANH3	Molybdenum ABC transporter, periplasmic molybdenum-binding protein ModA-1	modA1	252	Periplasmic	TIGR01256;	143	Transport and binding proteins	Anions	molybdate ion transport [GO:0015689]	metal ion binding [GO:0046872]		IPR005950;IPR006059	Mo_ABC_perip-bd;SBP_1_dom	ko02010
	RCAP_rcc00563	D5ANH4	Molybdenum transport system permease	modB1	228	Cytoplasmic Membrane	TIGR02141;	143	Transport and binding proteins	Anions		molybdate ion transmembrane transporter activity [GO:0015098]	integral component of membrane [GO:0016021]; plasma membrane [GO:0005886]	IPR000515;IPR011867	MetI-like;ModB_ABC	ko02010
*	RCAP_rcc00564	D5ANH5	Molybdenum import ATP-binding protein ModC (EC 7.3.2.5)	modC1	363	Cytoplasmic Membrane	TIGR02142;	143	Transport and binding proteins	Anions		ATPase-coupled molybdate transmembrane transporter activity [GO:0015412]; ATP binding [GO:0005524]; molybdenum ion transmembrane transporter activity [GO:0042888]	plasma membrane [GO:0005886]	IPR003593;IPR003439;IPR017871;IPR015852;IPR008995;IPR011868;IPR027417;IPR005116	AAA+_ATPase;ABC_transporter-like;ABC_transporter_CS;ABC_transpr_ModC;Mo/tungstate-bd_C_term_dom;ModC_ABC_ATP-bd;P-loop_NTPase;Transp-assoc_OB_typ1	ko02010
*	RCAP_rcc00565	D5ANH6	Molybdenum utilization protein ModD (EC 2.4.2.-)	modD	279	Cytoplasmic Membrane	TIGR01334;	157	Unknown function	General	NAD biosynthetic process [GO:0009435]	nicotinate-nucleotide diphosphorylase (carboxylating) activity [GO:0004514]		IPR013785;IPR006242;IPR027277;IPR002638;IPR022412	Aldolase_TIM;ModD;NadC/ModD;Quinolinate_PRibosylTrfase_C;Quinolinate_PRibosylTrfase_N
	RCAP_rcc00566	D5ANH7	Nitrogenase cofactor biosynthesis protein NifB-1 (Nitrogenase cofactor biosynthesis protein NifB-2)	nifB1	497	Unknown						4 iron, 4 sulfur cluster binding [GO:0051539]; catalytic activity [GO:0003824]; metal ion binding [GO:0046872]		IPR013785;IPR003731;IPR006638;IPR000385;IPR005980;IPR007197	Aldolase_TIM;Di-Nase_FeMo-co_biosynth;Elp3/MiaB/NifB;MoaA_NifB_PqqE_Fe-S-bd_CS;Nase_CF_NifB;rSAM	ko00910
*	RCAP_rcc00567	D5ANH8	Nif-specific regulatory protein-1	nifA1	582	Cytoplasmic	TIGR01817;	179	Central intermediary metabolism	Nitrogen fixation	nitrogen fixation [GO:0009399]	ATP binding [GO:0005524]; DNA-binding transcription factor activity [GO:0003700]; sequence-specific DNA binding [GO:0043565]; transcription factor binding [GO:0008134]		IPR003593;IPR003018;IPR029016;IPR009057;IPR002197;IPR010113;IPR027417;IPR002078;IPR025662;IPR025943;IPR025944	AAA+_ATPase;GAF;GAF_dom_like;Homeodomain-like;HTH_Fis;Nif-specific_regulatory_prot;P-loop_NTPase;Sigma_54_int;Sigma_54_int_dom_ATP-bd_1;Sigma_54_int_dom_ATP-bd_2;Sigma_54_int_dom_CS	ko02020
*	RCAP_rcc00568	D5ANH9	RNA polymerase sigma-54 factor	rpoN	428	Cytoplasmic	TIGR02395;	165	Transcription	Transcription factors	DNA-templated transcription, initiation [GO:0006352]; nitrogen fixation [GO:0009399]	DNA binding [GO:0003677]; DNA-binding transcription activator activity [GO:0001216]; DNA-directed 5'-3' RNA polymerase activity [GO:0003899]; sigma factor activity [GO:0016987]		IPR000394;IPR007046;IPR007634	RNA_pol_sigma_54;RNA_pol_sigma_54_core-bd;RNA_pol_sigma_54_DNA-bd	ko02020;ko03020;ko05111
	RCAP_rcc00569	D5ANI0	Nitrogen fixation protein NifU-1	nifU1	142	Unknown					iron-sulfur cluster assembly [GO:0016226]	iron ion binding [GO:0005506]; iron-sulfur cluster binding [GO:0051536]		IPR001075	NIF_FeS_clus_asmbl_NifU_C
	RCAP_rcc00570	D5ANI1	Nitrogenase molybdenum-iron protein beta chain (EC 1.18.6.1) (Dinitrogenase)	nifK	512	Cytoplasmic	TIGR01286;	179	Central intermediary metabolism	Nitrogen fixation	nitrogen fixation [GO:0009399]	ATP binding [GO:0005524]; carbonyl sulfide nitrogenase activity [GO:0018697]; iron-sulfur cluster binding [GO:0051536]; metal ion binding [GO:0046872]; nitrogenase activity [GO:0016163]	molybdenum-iron nitrogenase complex [GO:0016612]	IPR000510;IPR000318;IPR005976;IPR024564	Nase/OxRdtase_comp1;Nase_comp1_CS;Nase_Mo-Fe_CF_bsu;Nase_Mo-Fe_CF_bsu_N	ko00625;ko00910
	RCAP_rcc00571	D5ANI2	Nitrogenase protein alpha chain (EC 1.18.6.1)	nifD	501	Cytoplasmic	TIGR01862;TIGR01282;	179	Central intermediary metabolism	Nitrogen fixation	nitrogen fixation [GO:0009399]	carbonyl sulfide nitrogenase activity [GO:0018697]; iron-sulfur cluster binding [GO:0051536]; metal ion binding [GO:0046872]; nitrogenase activity [GO:0016163]	molybdenum-iron nitrogenase complex [GO:0016612]	IPR000510;IPR010143;IPR000318;IPR005972	Nase/OxRdtase_comp1;Nase_comp1_asu;Nase_comp1_CS;Nase_Mo-Fe_asu	ko00625;ko00910
	RCAP_rcc00572	D5ANI3	Nitrogenase iron protein 1 (EC 1.18.6.1) (Nitrogenase Fe protein 1) (Nitrogenase component II) (Nitrogenase reductase)	nifH	295	Cytoplasmic	TIGR01287;	179	Central intermediary metabolism	Nitrogen fixation	nitrogen fixation [GO:0009399]	4 iron, 4 sulfur cluster binding [GO:0051539]; ATP binding [GO:0005524]; carbonyl sulfide nitrogenase activity [GO:0018697]; metal ion binding [GO:0046872]; nitrogenase activity [GO:0016163]	molybdenum-iron nitrogenase complex [GO:0016612]	IPR030655;IPR000392;IPR005977;IPR027417	NifH/chlL_CS;Nitogenase_NifH/Reductase_ChlL;Nitrogenase_Fe_NifH;P-loop_NTPase	ko00625;ko00910
	RCAP_rcc00573	D5ANI4	Ferredoxin V	fdxD	123	Unknown						2 iron, 2 sulfur cluster binding [GO:0051537]; electron transfer activity [GO:0009055]		IPR001041;IPR006058;IPR012675	2Fe-2S_ferredoxin-type;2Fe2S_fd_BS;Beta-grasp_dom
	RCAP_rcc00574	D5ANI5	Transcriptional regulator, Crp/Fnr family	RCAP_rcc00574	208	Unknown					regulation of transcription, DNA-templated [GO:0006355]	DNA binding [GO:0003677]		IPR018490;IPR000595;IPR012318;IPR014710;IPR001808;IPR011991	cNMP-bd-like;cNMP-bd_dom;HTH_CRP_2;RmlC-like_jellyroll;Tscrpt_reg_HTH_Crp;WHTH_DNA-bd_dom
	RCAP_rcc00575	D5ANI6	N(2)-fixation sustaining protein CowN (CO weal-nitrogenase)	cowN	92	Unknown					nitrogen fixation [GO:0009399]			IPR024899	CowN
	RCAP_rcc00576	D5ANI7	Rubisco activation protein CbbO	cbbO	747	Cytoplasmic								IPR002035	VWF_A
	RCAP_rcc00577	D5ANI8	CbbQ protein	cbbQ	267	Cytoplasmic						ATPase activity [GO:0016887]; ATP binding [GO:0005524]		IPR011704;IPR013615;IPR027417	ATPase_dyneun-rel_AAA;CbbQ_C;P-loop_NTPase	ko00910
	RCAP_rcc00578	D5ANI9	Ribulose bisphosphate carboxylase, small subunit (EC 4.1.1.39)	cbbS	118	Unknown						ribulose-bisphosphate carboxylase activity [GO:0016984]		IPR000894	RuBisCO_sc_dom	ko00630;ko00710
	RCAP_rcc00579	O32740	Ribulose bisphosphate carboxylase large chain (RuBisCO large subunit) (EC 4.1.1.39)	cbbL	473	Cytoplasmic					reductive pentose-phosphate cycle [GO:0019253]	magnesium ion binding [GO:0000287]; monooxygenase activity [GO:0004497]; ribulose-bisphosphate carboxylase activity [GO:0016984]		IPR020878;IPR020888;IPR000685;IPR017443;IPR017444	RuBisCo_large_chain_AS;RuBisCO_lsu;RuBisCO_lsu_C;RuBisCO_lsu_fd_N;RuBisCO_lsu_N	ko00630;ko00710
	RCAP_rcc00580	D5ANJ1	RuBisCO operon transcriptional regulator CbbR-1	cbbR1	298	Cytoplasmic						DNA binding [GO:0003677]; DNA-binding transcription factor activity [GO:0003700]		IPR005119;IPR000847;IPR011991	LysR_subst-bd;Tscrpt_reg_HTH_LysR;WHTH_DNA-bd_dom
	RCAP_rcc00581	D5ANJ2	Uncharacterized protein	RCAP_rcc00581	183	Unknown								IPR018656	DUF2087
*	RCAP_rcc00582	D5ANJ3	Uncharacterized protein	RCAP_rcc00582	106	Cytoplasmic								IPR018961	DnaJ_homolog_subfam-C_membr-28
	RCAP_rcc00583	D5ANJ4	Transcriptional regulator, TetR family	RCAP_rcc00583	205	Unknown						DNA binding [GO:0003677]		IPR009057;IPR001647;IPR015893;IPR011075	Homeodomain-like;HTH_TetR;Tet_transcr_reg_TetR-like_C;Tet_transcr_reg_TetR-rel_C
	RCAP_rcc00584	D5ANJ5	Nitrogen fixation regulatory protein AnfA	anfA	538	Cytoplasmic					regulation of transcription, DNA-templated [GO:0006355]	ATP binding [GO:0005524]; sequence-specific DNA binding [GO:0043565]; transcription factor binding [GO:0008134]		IPR003593;IPR003018;IPR029016;IPR009057;IPR002197;IPR027417;IPR002078;IPR025662;IPR025943;IPR025944	AAA+_ATPase;GAF;GAF_dom_like;Homeodomain-like;HTH_Fis;P-loop_NTPase;Sigma_54_int;Sigma_54_int_dom_ATP-bd_1;Sigma_54_int_dom_ATP-bd_2;Sigma_54_int_dom_CS	ko02020
	RCAP_rcc00585	D5ANJ6	Nitrogenase iron protein (EC 1.18.6.1) (Nitrogenase Fe protein) (Nitrogenase component II) (Nitrogenase reductase)	anfH	275	Cytoplasmic	TIGR01287;	179	Central intermediary metabolism	Nitrogen fixation	nitrogen fixation [GO:0009399]	4 iron, 4 sulfur cluster binding [GO:0051539]; ATP binding [GO:0005524]; carbonyl sulfide nitrogenase activity [GO:0018697]; metal ion binding [GO:0046872]; nitrogenase activity [GO:0016163]	molybdenum-iron nitrogenase complex [GO:0016612]	IPR030655;IPR000392;IPR005977;IPR027417	NifH/chlL_CS;Nitogenase_NifH/Reductase_ChlL;Nitrogenase_Fe_NifH;P-loop_NTPase	ko00625;ko00910
	RCAP_rcc00586	D5ANJ7	Nitrogenase protein alpha chain (EC 1.18.6.1)	anfD	527	Cytoplasmic	TIGR01284;TIGR01861;TIGR01862;	179	Central intermediary metabolism	Nitrogen fixation	nitrogen fixation [GO:0009399]	carbonyl sulfide nitrogenase activity [GO:0018697]; iron-sulfur cluster binding [GO:0051536]; metal ion binding [GO:0046872]; nitrogenase activity [GO:0016163]		IPR000510;IPR005974;IPR010143;IPR000318;IPR011290	Nase/OxRdtase_comp1;Nase_asu;Nase_comp1_asu;Nase_comp1_CS;Nase_Fe-Fe_asu	ko00625;ko00910
	RCAP_rcc00587	D5ANJ8	Nitrogenase iron-iron protein, delta subunit (EC 1.18.6.1)	anfG	115	Unknown	TIGR02929;	179	Central intermediary metabolism	Nitrogen fixation	nitrogen fixation [GO:0009399]	carbonyl sulfide nitrogenase activity [GO:0018697]; iron ion binding [GO:0005506]; iron-sulfur cluster binding [GO:0051536]; nitrogenase activity [GO:0016163]		IPR014278;IPR004349	Nase_Fe-Fe_dsu;V/Nase_d_su	ko00625;ko00910
	RCAP_rcc00588	D5ANJ9	Nitrogenase iron-iron protein, beta subunit (EC 1.18.6.1)	anfK	460	Cytoplasmic	TIGR02931;	179	Central intermediary metabolism	Nitrogen fixation	nitrogen fixation [GO:0009399]	carbonyl sulfide nitrogenase activity [GO:0018697]; nitrogenase activity [GO:0016163]		IPR000510;IPR000318;IPR014280	Nase/OxRdtase_comp1;Nase_comp1_CS;Nase_Fe-Fe_bsu	ko00625;ko00910
	RCAP_rcc00589	D5ANK0	Nitrogenase iron-iron accessory protein AnfO	anfO	226	Unknown	TIGR02940;	179	Central intermediary metabolism	Nitrogen fixation				IPR014287	Nase_Fe-Fe_AnfO
	RCAP_rcc00590	D5ANK1	Uncharacterized protein	RCAP_rcc00590	173	Unknown						gamma-glutamylcyclotransferase activity [GO:0003839]		IPR013024;IPR017939	Butirosin_synth_BtrG-like;G-Glutamylcylcotransferase
	RCAP_rcc00591	D5ANK2	Flavin-nucleotide-binding protein	RCAP_rcc00591	216	Cytoplasmic						cofactor binding [GO:0048037]		IPR024747;IPR012349	Pyridox_Oxase-rel;Split_barrel_FMN-bd
*	RCAP_rcc00592	D5ANK3	Hydroxypyruvate isomerase (EC 5.3.1.22)	hyi	257	Cytoplasmic						hydroxypyruvate isomerase activity [GO:0008903]		IPR026040;IPR013022	HyI-like;Xyl_isomerase-like_TIM-brl	ko00630
*	RCAP_rcc00593	D5ANK4	Uncharacterized protein	RCAP_rcc00593	195	Cytoplasmic								IPR010707;IPR023361	DUF1285;DUF1285_beta_roll
*	RCAP_rcc00594	D5ANK5	ATPase, MoxR family protein (EC 3.6.1.-)	RCAP_rcc00594	337	Unknown						ATPase activity [GO:0016887]; ATP binding [GO:0005524]		IPR003593;IPR011703;IPR016366;IPR027417	AAA+_ATPase;ATPase_AAA-3;ATPase_chaperone_AAA_MoxR_prd;P-loop_NTPase
*	RCAP_rcc00595	D5ANK6	Uncharacterized protein	RCAP_rcc00595	302	Unknown								IPR002881	DUF58
*	RCAP_rcc00596	D5ANK7	Uncharacterized protein	RCAP_rcc00596	914	Cytoplasmic Membrane	TIGR02226;	704	Hypothetical proteins	Domain			integral component of membrane [GO:0016021]	IPR024163;IPR029062;IPR011933;IPR025297	Aerotolerance_reg_N;Class_I_gatase-like;Double_TM_dom;DUF4159
*	RCAP_rcc00597	D5ANK8	Uncharacterized protein	RCAP_rcc00597	699	Unknown							integral component of membrane [GO:0016021]	IPR029062;IPR010768	Class_I_gatase-like;DUF1355
*	RCAP_rcc00598	D5ANK9	Peptidase, M20 family, amidohydrolase (EC 3.4.17.-)	RCAP_rcc00598	383	Unknown	TIGR01891;	138	Protein fate	Degradation of proteins, peptides, and glycopeptides		carboxypeptidase activity [GO:0004180]		IPR017439;IPR002933;IPR011650	Amidohydrolase;Peptidase_M20;Peptidase_M20_dimer
	RCAP_rcc00599	D5ANL0	Uncharacterized protein	RCAP_rcc00599	140	Unknown								IPR008320	UCP032025
*	RCAP_rcc00600	D5ANL1	Vitamin B12-dependent ribonucleotide reductase (EC 1.17.4.1)	nrdJ1	755	Cytoplasmic	TIGR02504;	123	Purines, pyrimidines, nucleosides, and nucleotides	2'-Deoxyribonucleotide metabolism	DNA biosynthetic process [GO:0071897]; DNA replication [GO:0006260]	ATP binding [GO:0005524]; cobalamin binding [GO:0031419]; ribonucleoside-diphosphate reductase activity, thioredoxin disulfide as acceptor [GO:0004748]		IPR000788;IPR013509;IPR013344;IPR024434	RNR_lg_C;RNR_lsu_N;RNR_NrdJ/NrdZ;TSCPD_dom	ko00230;ko00240
*	RCAP_rcc00601	D5ANL2	Divalent metal cation transporter MntH	mntH	431	Cytoplasmic Membrane	TIGR01197;	145	Transport and binding proteins	Cations and iron carrying compounds		metal ion binding [GO:0046872]; metal ion transmembrane transporter activity [GO:0046873]; symporter activity [GO:0015293]	integral component of membrane [GO:0016021]; plasma membrane [GO:0005886]	IPR001046	NRAMP_fam
*	RCAP_rcc00602	D5ANL3	Transcriptional regulator MntR	mntR	149	Cytoplasmic						DNA binding [GO:0003677]; DNA-binding transcription factor activity [GO:0003700]; protein dimerization activity [GO:0046983]; transition metal ion binding [GO:0046914]		IPR001367;IPR022689;IPR022687;IPR011991	Fe_dep_repressor;Fe_dep_repressor_HTH_DtxR;Fe_dep_repressor_HTH_DtxR_N;WHTH_DNA-bd_dom
*	RCAP_rcc00603	D5ANL4	Hydrolase, alpha/beta fold family	RCAP_rcc00603	494	Cytoplasmic Membrane						hydrolase activity [GO:0016787]	integral component of membrane [GO:0016021]	IPR029058;IPR029059	AB_hydrolase;AB_hydrolase_5
	RCAP_rcc00604	D5ANL5	Integral membrane protein, TerC family	RCAP_rcc00604	329	Cytoplasmic Membrane	TIGR03718;	97	Protein fate	Protein and peptide secretion and trafficking			integral component of membrane [GO:0016021]	IPR005496;IPR022369	Integral_membrane_TerC;Integral_membrane_TerC_rswitch
*	RCAP_rcc00605	D5ANL6	Probable potassium transport system protein kup	kup	637	Cytoplasmic Membrane						potassium ion transmembrane transporter activity [GO:0015079]	integral component of membrane [GO:0016021]; plasma membrane [GO:0005886]	IPR003855;IPR023051	K+_transporter;K+_uptake_low_affin
*	RCAP_rcc00606	D5ANL7	Lipoprotein, putative	RCAP_rcc00606	151	Unknown
*	RCAP_rcc00607	D5ANL8	Cold shock protein CspA-1	cspA1	68	Cytoplasmic						nucleic acid binding [GO:0003676]	cytoplasm [GO:0005737]	IPR019844;IPR012156;IPR011129;IPR002059;IPR012340	Cold-shock_CS;Cold_shock_CspA;Cold_shock_prot;CSP_DNA-bd;NA-bd_OB-fold
	RCAP_rcc00608	D5ANL9	Uncharacterized protein	RCAP_rcc00608	53	Unknown
	RCAP_rcc00609	D5ANM0	Conserved domain protein	RCAP_rcc00609	68	Unknown
	RCAP_rcc00610	D5ANM1	Uncharacterized protein	RCAP_rcc00610	58	Unknown
*	RCAP_rcc00611	D5ANM2	Nickel-responsive regulator NikR	nikR	156	Unknown					regulation of transcription, DNA-templated [GO:0006355]	DNA binding [GO:0003677]		IPR013321;IPR002145;IPR010985;IPR014864	Arc_rbn_hlx_hlx;CopG;Ribbon_hlx_hlx;TF_NikR_Ni-bd_C
*	RCAP_rcc00612	D5ANM3	UPF0178 protein RCAP_rcc00612	RCAP_rcc00612	148	Cytoplasmic								IPR003791	UPF0178
*	RCAP_rcc00613	D5ANM4	Transcriptional regulator, TetR family	RCAP_rcc00613	209	Cytoplasmic						DNA binding [GO:0003677]		IPR023772;IPR009057;IPR001647;IPR015893;IPR011075;IPR013572	DNA-bd_HTH_TetR-type_CS;Homeodomain-like;HTH_TetR;Tet_transcr_reg_TetR-like_C;Tet_transcr_reg_TetR-rel_C;Tscrpt_reg_MAATS_C
*	RCAP_rcc00614	D5ANM5	RND efflux system, outer membrane lipoprotein, NodT family	RCAP_rcc00614	450	Outer Membrane	TIGR01845;	96	Cellular processes	Detoxification		efflux transmembrane transporter activity [GO:0015562]	integral component of membrane [GO:0016021]; plasma membrane [GO:0005886]	IPR003423;IPR010131;IPR006311	OMP_efflux;RND_efflux_OM_lipoprot_NodT;TAT_signal
*	RCAP_rcc00615	D5ANM6	Acriflavine resistance protein A	acrA	366	Cytoplasmic Membrane	TIGR01730;	141	Transport and binding proteins	Unknown substrate	transmembrane transport [GO:0055085]	transporter activity [GO:0005215]	membrane [GO:0016020]	IPR006143	RND_pump_MFP
*	RCAP_rcc00616	D5ANM7	Efflux pump membrane transporter	acrB	1041	Cytoplasmic Membrane	TIGR00915;	94	Cellular processes	Toxin production and resistance	drug transmembrane transport [GO:0006855]	efflux transmembrane transporter activity [GO:0015562]	integral component of membrane [GO:0016021]; plasma membrane [GO:0005886]	IPR027463;IPR001036;IPR004764	AcrB_DN_DC_subdom;Acrflvin-R;HAE1
*	RCAP_rcc00617	D5ANM8	Secretion protein, HlyD family	RCAP_rcc00617	334	Cytoplasmic Membrane
*	RCAP_rcc00618	D5ANM9	ABC transporter, ATP-binding/permease protein (EC 3.6.3.-)	RCAP_rcc00618	902	Cytoplasmic Membrane					transmembrane transport [GO:0055085]	ATPase activity [GO:0016887]; ATP binding [GO:0005524]	ATP-binding cassette (ABC) transporter complex [GO:0043190]	IPR003593;IPR000412;IPR003439;IPR017871;IPR027417	AAA+_ATPase;ABC_2_transport;ABC_transporter-like;ABC_transporter_CS;P-loop_NTPase
*	RCAP_rcc00619	D5ANN0	ABC transporter, permease protein	RCAP_rcc00619	372	Cytoplasmic Membrane					transmembrane transport [GO:0055085]		ATP-binding cassette (ABC) transporter complex [GO:0043190]	IPR000412	ABC_2_transport	ko02010
*	RCAP_rcc00620	D5ANN1	Response regulator receiver modulated diguanylate cyclase/phosphodiesterase (EC 3.1.4.-)	RCAP_rcc00620	610	Cytoplasmic Membrane	TIGR00254;	264	Regulatory functions	Small molecule interactions	phosphorelay signal transduction system [GO:0000160]	hydrolase activity [GO:0016787]		IPR011006;IPR001633;IPR000160;IPR029787;IPR001789	CheY-like_superfamily;EAL_dom;GGDEF_dom;Nucleotide_cyclase;Sig_transdc_resp-reg_receiver
*	RCAP_rcc00621	D5ANN2	Histidine kinase (EC 2.7.13.3)	RCAP_rcc00621	619	Cytoplasmic Membrane					phosphorelay signal transduction system [GO:0000160]	ATP binding [GO:0005524]; protein histidine kinase activity [GO:0004673]	integral component of membrane [GO:0016021]	IPR007892;IPR003660;IPR003594;IPR005467	CHASE4;HAMP_linker_domain;HATPase_C;Sig_transdc_His_kinase_core
*	RCAP_rcc00622	D5ANN3	Molybdopterin molybdenumtransferase (EC 2.10.1.1)	moeA	414	Cytoplasmic					molybdopterin cofactor biosynthetic process [GO:0032324]; Mo-molybdopterin cofactor biosynthetic process [GO:0006777]			IPR001453;IPR008284;IPR005111;IPR005110	MoaB/Mog_dom;MoCF_biosynth_CS;MoeA_C_domain_IV;MoeA_linker/N
	RCAP_rcc00623	D5ANN4	Transcriptional regulator, RpiR family	RCAP_rcc00623	276	Cytoplasmic					carbohydrate derivative metabolic process [GO:1901135]	carbohydrate derivative binding [GO:0097367]; DNA binding [GO:0003677]; DNA-binding transcription factor activity [GO:0003700]		IPR009057;IPR000281;IPR001347;IPR011991	Homeodomain-like;HTH_RpiR;SIS;WHTH_DNA-bd_dom
*	RCAP_rcc00624	D5ANN5	Amino acid ABC transporter, periplasmic amino acid-binding protein	RCAP_rcc00624	258	Periplasmic								IPR018313;IPR001638	SBP_3_CS;Solute-binding_3/MltF_N
	RCAP_rcc00625	D5ANN6	Amino acid ABC transporter, permease protein	RCAP_rcc00625	236	Cytoplasmic Membrane	TIGR01726;	142	Transport and binding proteins	Amino acids, peptides and amines	nitrogen compound transport [GO:0071705]	transmembrane transporter activity [GO:0022857]	ATP-binding cassette (ABC) transporter complex [GO:0043190]	IPR010065;IPR000515	AA_ABC_transptr_permease_3TM;MetI-like
	RCAP_rcc00626	D5ANN7	Amino acid ABC transporter, permease protein	RCAP_rcc00626	232	Cytoplasmic Membrane	TIGR01726;	142	Transport and binding proteins	Amino acids, peptides and amines	nitrogen compound transport [GO:0071705]	transmembrane transporter activity [GO:0022857]	ATP-binding cassette (ABC) transporter complex [GO:0043190]	IPR010065;IPR000515	AA_ABC_transptr_permease_3TM;MetI-like
*	RCAP_rcc00627	D5ANN8	Amino acid ABC transporter, ATP-binding protein (EC 3.6.3.-)	RCAP_rcc00627	259	Cytoplasmic Membrane						amino acid-transporting ATPase activity [GO:0015424]; ATP binding [GO:0005524]		IPR003593;IPR030679;IPR003439;IPR017871;IPR027417	AAA+_ATPase;ABC_ATPase_HisP-typ;ABC_transporter-like;ABC_transporter_CS;P-loop_NTPase
*	RCAP_rcc00628	D5ANN9	o-succinylbenzoate synthase (OSB synthase) (OSBS) (EC 4.2.1.113) (4-(2'-carboxyphenyl)-4-oxybutyric acid synthase) (o-succinylbenzoic acid synthase)	menC	375	Cytoplasmic	TIGR01928;	81	Biosynthesis of cofactors, prosthetic groups, and carriers	Menaquinone and ubiquinone	menaquinone biosynthetic process [GO:0009234]	hydro-lyase activity [GO:0016836]; magnesium ion binding [GO:0000287]		IPR029065;IPR029017;IPR013342;IPR013341;IPR001354;IPR010197	Enolase_C-like;Enolase_N_like;Mandelate_racemase_C;Mandelate_racemase_N_dom;MR/MLE/MAL;OSB_synthase_MenC_2	ko00130
*	RCAP_rcc00629	D5ANP0	Acetyltransferase, GNAT family	RCAP_rcc00629	241	Unknown						transferase activity [GO:0016740]		IPR016181;IPR000182	Acyl_CoA_acyltransferase;GNAT_dom
	RCAP_rcc00630	D5ANP1	Ice nucleation protein repeat family protein	RCAP_rcc00630	2145	Outer Membrane
	RCAP_rcc00631	D5ANP2	Conserved domain protein	RCAP_rcc00631	265	Unknown
	RCAP_rcc00632	D5ANP3	Uncharacterized protein	RCAP_rcc00632	543	Unknown								IPR016187;IPR005532	C-type_lectin_fold;SUMF_dom
*	RCAP_rcc00633	D5ANP4	ABC transporter, permease protein	RCAP_rcc00633	399	Cytoplasmic Membrane							integral component of membrane [GO:0016021]	IPR003838	ABC_permease_dom
	RCAP_rcc00634	D5ANP5	ABC transporter, ATP-binding protein (EC 3.6.3.-)	RCAP_rcc00634	241	Cytoplasmic Membrane						ATPase activity [GO:0016887]; ATP binding [GO:0005524]		IPR003593;IPR003439;IPR027417	AAA+_ATPase;ABC_transporter-like;P-loop_NTPase
*	RCAP_rcc00635	D5ANP6	von Willebrand factor type A domain protein	RCAP_rcc00635	637	Unknown								IPR002035	VWF_A
*	RCAP_rcc00636	D5ANP7	Uncharacterized protein	RCAP_rcc00636	370	Unknown							integral component of membrane [GO:0016021]
*	RCAP_rcc00637	D5ANP8	Uncharacterized protein	RCAP_rcc00637	890	Cytoplasmic								IPR017030	Vir_effector_SfrC
*	RCAP_rcc00638	D5ANP9	Virulence protein SrfB	srfB	1040	Cytoplasmic								IPR009216	Virulence_factor_SrfB
*	RCAP_rcc00639	D5ANQ0	Uncharacterized protein	RCAP_rcc00639	438	Unknown							integral component of membrane [GO:0016021]
*	RCAP_rcc00640	D5ANQ1	Peptidase, S1/S6 family (EC 3.4.21.-)	RCAP_rcc00640	590	Unknown						hydrolase activity [GO:0016787]	integral component of membrane [GO:0016021]	IPR009003	Trypsin-like_Pept_dom
	RCAP_rcc00641	D5ANQ2	Uncharacterized protein	RCAP_rcc00641	236	Unknown
*	RCAP_rcc00642	D5ANQ3	Peptidoglycan binding domain protein	RCAP_rcc00642	424	Unknown								IPR002477	Peptidoglycan-bd-like
*	RCAP_rcc00643	D5ANQ4	Diguanylate cyclase/phosphodiesterase with PAS/PAC sensor (EC 3.1.4.-)	RCAP_rcc00643	936	Cytoplasmic Membrane	TIGR00254;TIGR00229;	264	Regulatory functions	Small molecule interactions		hydrolase activity [GO:0016787]		IPR001633;IPR000160;IPR029787;IPR001610;IPR000014;IPR013656	EAL_dom;GGDEF_dom;Nucleotide_cyclase;PAC;PAS;PAS_4
*	RCAP_rcc00644	D5ANQ5	Methyl-accepting chemotaxis protein McpX	mcpX	778	Cytoplasmic Membrane					chemotaxis [GO:0006935]; signal transduction [GO:0007165]	transmembrane signaling receptor activity [GO:0004888]	integral component of membrane [GO:0016021]	IPR004090;IPR003660;IPR004089;IPR013587	Chemotax_Me-accpt_rcpt;HAMP_linker_domain;MCPsignal_dom;Nitrate/nitrite_sensing	ko02020;ko02030
*	RCAP_rcc00645	D5ANQ6	Diguanylate cyclase/phosphodiesterase with PAS/PAC sensor (EC 3.1.4.-)	RCAP_rcc00645	1245	Cytoplasmic Membrane	TIGR00254;TIGR00229;	264	Regulatory functions	Small molecule interactions		hydrolase activity [GO:0016787]		IPR001633;IPR000160;IPR029787;IPR001610;IPR000014;IPR000700;IPR013767;IPR013655	EAL_dom;GGDEF_dom;Nucleotide_cyclase;PAC;PAS;PAS-assoc_C;PAS_fold;PAS_fold_3
*	RCAP_rcc00646	D5ANQ7	Acetyltransferase, GNAT family (EC 2.3.1.-)	RCAP_rcc00646	152	Unknown						transferase activity, transferring acyl groups [GO:0016746]		IPR016181;IPR000182	Acyl_CoA_acyltransferase;GNAT_dom
*	RCAP_rcc00647	D5ANQ8	3-deoxy-D-manno-octulosonic acid transferase (Kdo transferase) (EC 2.4.99.12) (Lipid IV(A) 3-deoxy-D-manno-octulosonic acid transferase)	kdtA2	454	Cytoplasmic Membrane						transferase activity, transferring glycosyl groups [GO:0016757]	integral component of membrane [GO:0016021]	IPR007507	Glycos_transf_N	ko00540
*	RCAP_rcc00648	D5ANQ9	3-deoxy-D-manno-octulosonic acid transferase (Kdo transferase) (EC 2.4.99.12) (Lipid IV(A) 3-deoxy-D-manno-octulosonic acid transferase)	kdtA3	429	Outer Membrane						transferase activity, transferring glycosyl groups [GO:0016757]		IPR007507	Glycos_transf_N	ko00540
	RCAP_rcc00649	D5ANR0	Diacylglycerol kinase (EC 2.7.1.107)	dgkA	130	Cytoplasmic Membrane					phosphatidic acid biosynthetic process [GO:0006654]	ATP binding [GO:0005524]; diacylglycerol kinase activity [GO:0004143]	integral component of membrane [GO:0016021]; plasma membrane [GO:0005886]	IPR000829	Diacylglycerol_kinase_prok	ko00561;ko00564;ko04070
	RCAP_rcc00650	D5ANR1	Sulfatase family protein (EC 3.1.6.-)	RCAP_rcc00650	555	Cytoplasmic Membrane						sulfuric ester hydrolase activity [GO:0008484]; transferase activity, transferring phosphorus-containing groups [GO:0016772]	integral component of membrane [GO:0016021]	IPR017849;IPR017850;IPR012549;IPR000917	Alkaline_Pase-like_a/b/a;Alkaline_phosphatase_core;DUF1705;Sulfatase
*	RCAP_rcc00651	D5ANR2	Two component transcriptional regulator, winged helix family	RCAP_rcc00651	217	Cytoplasmic					phosphorelay signal transduction system [GO:0000160]; regulation of transcription, DNA-templated [GO:0006355]	DNA binding [GO:0003677]		IPR011006;IPR001867;IPR001789;IPR011991	CheY-like_superfamily;Sig_transdc_resp-reg_C;Sig_transdc_resp-reg_receiver;WHTH_DNA-bd_dom
*	RCAP_rcc00652	D5ANR3	Histidine kinase (EC 2.7.13.3)	RCAP_rcc00652	410	Cytoplasmic Membrane						ATP binding [GO:0005524]; phosphorelay sensor kinase activity [GO:0000155]	integral component of membrane [GO:0016021]	IPR003661;IPR003660;IPR003594;IPR005467;IPR009082	EnvZ-like_dim/P;HAMP_linker_domain;HATPase_C;Sig_transdc_His_kinase_core;Sig_transdc_His_kinase_dimeric
*	RCAP_rcc00653	D5ANR4	ABC-1 domain protein	RCAP_rcc00653	440	Cytoplasmic Membrane								IPR011009;IPR004147	Kinase-like_dom;UbiB_dom
*	RCAP_rcc00654	D5ANR5	Uncharacterized protein	RCAP_rcc00654	211	Unknown								IPR003731	Di-Nase_FeMo-co_biosynth
*	RCAP_rcc00655	D5ANR6	Uncharacterized protein	RCAP_rcc00655	162	Unknown								IPR009739	DUF1311
	RCAP_rcc00656	D5ANR7	Membrane protein, putative	RCAP_rcc00656	274	Cytoplasmic Membrane	TIGR03055;	164	Energy metabolism	Photosynthesis			integral component of membrane [GO:0016021]	IPR017496	Photo_alph_chp2
*	RCAP_rcc00657	D5ANR8	Uncharacterized protein	RCAP_rcc00657	162	Unknown	TIGR03054;	164	Energy metabolism	Photosynthesis				IPR017495	Photo_alph_chp1
*	RCAP_rcc00658	D5ANR9	Uncharacterized protein	RCAP_rcc00658	213	Cytoplasmic Membrane							integral component of membrane [GO:0016021]	IPR005182	DUF304
*	RCAP_rcc00659	D5ANS0	Photosynthetic reaction center, H subunit	puhA	254	Unknown	TIGR01150;	112	Energy metabolism	Electron transport	photosynthesis, light reaction [GO:0019684]	electron transporter, transferring electrons within the cyclic electron transport pathway of photosynthesis activity [GO:0045156]	integral component of membrane [GO:0016021]; plasma membrane light-harvesting complex [GO:0030077]	IPR014747;IPR005652;IPR015810;IPR027275;IPR011033	Bac_photo_RC_H_C;Photo_RC_H;Photo_RC_H_N;PRC-brl_dom;PRC_barrel-like
*	RCAP_rcc00660	D5ANS1	Protein PucC-1	pucC1	477	Cytoplasmic Membrane							integral component of membrane [GO:0016021]	IPR020846;IPR026036;IPR004896	MFS_dom;PucC;PucC-rel
*	RCAP_rcc00661	D5ANS2	Magnesium-protoporphyrin O-methyltransferase (EC 2.1.1.11)	bchM	224	Cytoplasmic	TIGR02021;	191	Biosynthesis of cofactors, prosthetic groups, and carriers	Chlorophyll and bacteriochlorphyll	chlorophyll biosynthetic process [GO:0015995]	magnesium protoporphyrin IX methyltransferase activity [GO:0046406]		IPR010251;IPR010940;IPR029063;IPR007848	Mg_prot_MeTrfase;Mg_prot_MeTrfase_C;SAM-dependent_MTases;Small_mtfrase_dom	ko00860
*	RCAP_rcc00662	D5ANS3	Light-independent protochlorophyllide reductase iron-sulfur ATP-binding protein (DPOR subunit L) (LI-POR subunit L) (EC 1.3.7.7)	bchL	304	Cytoplasmic	TIGR01281;	191	Biosynthesis of cofactors, prosthetic groups, and carriers	Chlorophyll and bacteriochlorphyll	light-independent bacteriochlorophyll biosynthetic process [GO:0036070]; photosynthesis, dark reaction [GO:0019685]	4 iron, 4 sulfur cluster binding [GO:0051539]; ATP binding [GO:0005524]; metal ion binding [GO:0046872]; oxidoreductase activity, acting on iron-sulfur proteins as donors [GO:0016730]; oxidoreductase activity, acting on the CH-CH group of donors, iron-sulfur protein as acceptor [GO:0016636]		IPR030655;IPR000392;IPR027417;IPR005971	NifH/chlL_CS;Nitogenase_NifH/Reductase_ChlL;P-loop_NTPase;Protochlorophyllide_ATP-bd	ko00860
*	RCAP_rcc00663	P26162	Magnesium-chelatase subunit H (EC 6.6.1.1) (Mg-protoporphyrin IX chelatase subunit H)	bchH	1189	Cytoplasmic					light-independent bacteriochlorophyll biosynthetic process [GO:0036070]; photosynthesis [GO:0015979]	ATP binding [GO:0005524]; magnesium chelatase activity [GO:0016851]		IPR003672;IPR022571	CobN/Mg_chltase;Mg_chelatase_H_N	ko00860
*	RCAP_rcc00664	P26163	Light-independent protochlorophyllide reductase subunit B (DPOR subunit B) (LI-POR subunit B) (EC 1.3.7.7)	bchB	525	Cytoplasmic	TIGR01278;	191	Biosynthesis of cofactors, prosthetic groups, and carriers	Chlorophyll and bacteriochlorphyll	light-independent bacteriochlorophyll biosynthetic process [GO:0036070]; photosynthesis, dark reaction [GO:0019685]	4 iron, 4 sulfur cluster binding [GO:0051539]; ATP binding [GO:0005524]; metal ion binding [GO:0046872]; oxidoreductase activity, acting on iron-sulfur proteins as donors [GO:0016730]; oxidoreductase activity, acting on the CH-CH group of donors, iron-sulfur protein as acceptor [GO:0016636]		IPR000510;IPR013580;IPR005969;IPR016209	Nase/OxRdtase_comp1;P-CP/CP_red_C;Protochl_reductB;Protochlorophyllide_Rdtase	ko00860
*	RCAP_rcc00665	P26164	Light-independent protochlorophyllide reductase subunit N (DPOR subunit N) (LI-POR subunit N) (EC 1.3.7.7)	bchN	424	Cytoplasmic	TIGR01279;	191	Biosynthesis of cofactors, prosthetic groups, and carriers	Chlorophyll and bacteriochlorphyll	light-independent bacteriochlorophyll biosynthetic process [GO:0036070]; photosynthesis, dark reaction [GO:0019685]	4 iron, 4 sulfur cluster binding [GO:0051539]; ATP binding [GO:0005524]; metal ion binding [GO:0046872]; oxidoreductase activity, acting on iron-sulfur proteins as donors [GO:0016730]; oxidoreductase activity, acting on the CH-CH group of donors, iron-sulfur protein as acceptor [GO:0016636]		IPR000510;IPR005970	Nase/OxRdtase_comp1;Protochl_reductN	ko00860
*	RCAP_rcc00666	P26165	2-vinyl bacteriochlorophyllide hydratase (EC 4.2.1.-)	bchF	171	Cytoplasmic Membrane	TIGR02020;	164	Energy metabolism	Photosynthesis	bacteriochlorophyll biosynthetic process [GO:0030494]; light-independent bacteriochlorophyll biosynthetic process [GO:0036070]; photosynthesis, dark reaction [GO:0019685]	hydro-lyase activity [GO:0016836]		IPR009905	BCHF	ko00860
*	RCAP_rcc00667	D5ANS8	Regulatory protein PpaA	ppaA	218	Cytoplasmic						cobalamin binding [GO:0031419]; metal ion binding [GO:0046872]		IPR006158	Cobalamin-bd
*	RCAP_rcc00668	D5ANS9	Transcriptional regulator PpsR	ppsR	461	Cytoplasmic	TIGR02040;	164	Energy metabolism	Photosynthesis		sequence-specific DNA binding [GO:0043565]		IPR009057;IPR002197;IPR000014;IPR011785	Homeodomain-like;HTH_Fis;PAS;Tscrpt_reg_PpsR-CrtJ
*	RCAP_rcc00669	P26168	Anaerobic magnesium-protoporphyrin IX monomethyl ester cyclase (MPE cyclase) (EC 1.21.98.3)	bchE	575	Cytoplasmic					bacteriochlorophyll biosynthetic process [GO:0030494]; light-independent bacteriochlorophyll biosynthetic process [GO:0036070]; photosynthesis [GO:0015979]	4 iron, 4 sulfur cluster binding [GO:0051539]; cobalamin binding [GO:0031419]; metal ion binding [GO:0046872]; oxidoreductase activity [GO:0016491]		IPR011772;IPR006158;IPR006638;IPR023970;IPR007197;IPR023404	BchE;Cobalamin-bd;Elp3/MiaB/NifB;MeThioTfrase/rSAM;rSAM;rSAM_horseshoe
*	RCAP_rcc00670	P26169	Bacteriochlorophyll synthase 23 kDa chain (4-vinyl reductase)	bchJ	213	Unknown	TIGR02019;	191	Biosynthesis of cofactors, prosthetic groups, and carriers	Chlorophyll and bacteriochlorphyll	bacteriochlorophyll biosynthetic process [GO:0030494]; light-independent bacteriochlorophyll biosynthetic process [GO:0036070]; photosynthesis [GO:0015979]			IPR010249;IPR024096;IPR004096	BchJ;NO_sig/Golgi_transp_ligand-bd;V4R	ko00860
*	RCAP_rcc00671	P26170	Bacteriochlorophyll synthase 33 kDa chain (Geranylgeranyl bacteriochlorophyll synthase)	bchG	304	Cytoplasmic Membrane	TIGR01476;	191	Biosynthesis of cofactors, prosthetic groups, and carriers	Chlorophyll and bacteriochlorphyll	light-independent bacteriochlorophyll biosynthetic process [GO:0036070]; photosynthesis [GO:0015979]	transferase activity, transferring alkyl or aryl (other than methyl) groups [GO:0016765]	integral component of membrane [GO:0016021]; plasma membrane [GO:0005886]	IPR006372;IPR000537	Chl_synth;UbiA_prenyltransferase	ko00860
	RCAP_rcc00672	P26171	Bacteriochlorophyll synthase 44.5 kDa chain	RCAP_rcc00672	428	Cytoplasmic Membrane					light-independent bacteriochlorophyll biosynthetic process [GO:0036070]; photosynthesis [GO:0015979]		integral component of membrane [GO:0016021]	IPR020846;IPR026036;IPR004896	MFS_dom;PucC;PucC-rel
*	RCAP_rcc00673	P26172	Geranylgeranyl diphosphate reductase (EC 1.3.1.83) (Geranylgeranyl reductase)	bchP	391	Cytoplasmic	TIGR02023;TIGR02032;	191	Biosynthesis of cofactors, prosthetic groups, and carriers	Chlorophyll and bacteriochlorphyll	light-independent bacteriochlorophyll biosynthetic process [GO:0036070]; photosynthesis [GO:0015979]	geranylgeranyl diphosphate reductase activity [GO:0102067]; geranylgeranyl reductase activity [GO:0045550]		IPR010253;IPR011777;IPR016040;IPR023753;IPR003042	BchP_ChlP_pln/prok;Geranylgeranyl_Rdtase_fam;NAD(P)-bd_dom;Pyr_nucl-diS_OxRdtase_FAD/NAD;Rng_hydrolase-like	ko00860;ko00900
*	RCAP_rcc00674	P26173	Isopentenyl-diphosphate Delta-isomerase (IPP isomerase) (EC 5.3.3.2) (Bacteriochlorophyll synthase 20 kDa chain) (IPP:DMAPP isomerase) (Isopentenyl pyrophosphate isomerase)	idi	176	Cytoplasmic	TIGR02150;	76	Biosynthesis of cofactors, prosthetic groups, and carriers	Other	chlorophyll biosynthetic process [GO:0015995]; dimethylallyl diphosphate biosynthetic process [GO:0050992]; isoprenoid biosynthetic process [GO:0008299]; photosynthesis [GO:0015979]	hydrolase activity [GO:0016787]; isopentenyl-diphosphate delta-isomerase activity [GO:0004452]; metal ion binding [GO:0046872]	cytoplasm [GO:0005737]	IPR011876;IPR000086;IPR015797	IsopentenylPP_isomerase_typ1;NUDIX_hydrolase_dom;NUDIX_hydrolase_dom-like	ko00900
*	RCAP_rcc00675	D5ANT6	Magnesium-chelatase, BchO (EC 6.6.1.1)	bchO	284	Unknown	TIGR03056;	164	Energy metabolism	Photosynthesis		magnesium chelatase activity [GO:0016851]		IPR029058;IPR000073;IPR017497	AB_hydrolase;AB_hydrolase_1;Mg-chelatase_BchO
*	RCAP_rcc00676	P26175	Magnesium-chelatase 60 kDa subunit (Mg-chelatase subunit D) (EC 6.6.1.1) (Mg-protoporphyrin IX chelatase)	bchD	561	Cytoplasmic	TIGR02031;	191	Biosynthesis of cofactors, prosthetic groups, and carriers	Chlorophyll and bacteriochlorphyll	bacteriochlorophyll biosynthetic process [GO:0030494]; photosynthesis [GO:0015979]	ATP binding [GO:0005524]; magnesium chelatase activity [GO:0016851]		IPR011776;IPR027417;IPR002035	Mg_chelatase_ATPase-dsu;P-loop_NTPase;VWF_A	ko00860
*	RCAP_rcc00677	P26239	Magnesium-chelatase 38 kDa subunit (EC 6.6.1.1) (Mg-protoporphyrin IX chelatase)	bchI	350	Cytoplasmic	TIGR02030;	191	Biosynthesis of cofactors, prosthetic groups, and carriers	Chlorophyll and bacteriochlorphyll	bacteriochlorophyll biosynthetic process [GO:0030494]; photosynthesis [GO:0015979]	ATP binding [GO:0005524]; magnesium chelatase activity [GO:0016851]		IPR003593;IPR011775;IPR000523;IPR027417	AAA+_ATPase;Mg_chelatase_ATPase-isu;Mg_chelatse_chII;P-loop_NTPase	ko00860
*	RCAP_rcc00678	P17055	Spheroidene monooxygenase (EC 1.14.15.9)	crtA	241	Unknown					carotenoid biosynthetic process [GO:0016117]; chlorophyll biosynthetic process [GO:0015995]; photosynthesis [GO:0015979]	spheroidene monooxygenase activity [GO:0043823]
*	RCAP_rcc00679	P17054	Phytoene desaturase (neurosporene-forming) (EC 1.3.99.28) (3-step phytoene desaturase) (Phytoene dehydrogenase)	crtI	524	Cytoplasmic	TIGR02734;	76	Biosynthesis of cofactors, prosthetic groups, and carriers	Other	carotene biosynthetic process [GO:0016120]; carotenoid biosynthetic process [GO:0016117]	FAD binding [GO:0071949]; oxidoreductase activity, acting on the CH-CH group of donors [GO:0016627]		IPR002937;IPR014105;IPR008150	Amino_oxidase;CrtI_fam;Phytoene_DH_bac_CS	ko00906
*	RCAP_rcc00680	P17056	Phytoene synthase (PSase) (EC 2.5.1.-)	crtB	339	Cytoplasmic					carotenoid biosynthetic process [GO:0016117]; ergosterol biosynthetic process [GO:0006696]	farnesyl-diphosphate farnesyltransferase activity [GO:0004310]; geranylgeranyl-diphosphate geranylgeranyltransferase activity [GO:0016767]; metal ion binding [GO:0046872]; squalene synthase activity [GO:0051996]		IPR008949;IPR002060;IPR019845	Isoprenoid_synthase_dom;Squ/phyt_synthse;Squalene/phytoene_synthase_CS	ko00906
*	RCAP_rcc00681	P17057	Protein CrtK	crtK	160	Cytoplasmic Membrane					carotenoid biosynthetic process [GO:0016117]; chlorophyll biosynthetic process [GO:0015995]; photosynthesis [GO:0015979]		integral component of membrane [GO:0016021]; plasma membrane [GO:0005886]	IPR004307	TspO_MBR
*	RCAP_rcc00682	P17058	Acyclic carotenoid 1,2-hydratase (EC 4.2.1.131) (Hydroxyneurosporene synthase) (Lycopene hydratase) (Neurosporene hydratase)	crtC	281	Cytoplasmic					carotenoid metabolic process [GO:0016116]; chlorophyll biosynthetic process [GO:0015995]; photosynthesis [GO:0015979]; spheroidene biosynthetic process [GO:1901180]	hydro-lyase activity [GO:0016836]		IPR010791	Hydrx-neurosporene_synth_CrtC	ko00906
*	RCAP_rcc00683	P17059	Hydroxyneurosporene desaturase (HND) (1-hydroxycarotenoid 3,4-dehydrogenase) (1-hydroxycarotenoid 3,4-desaturase) (EC 1.3.99.27)	crtD	494	Unknown	TIGR02734;	76	Biosynthesis of cofactors, prosthetic groups, and carriers	Other	carotenoid biosynthetic process [GO:0016117]; chlorophyll biosynthetic process [GO:0015995]; photosynthesis [GO:0015979]	oxidoreductase activity [GO:0016491]		IPR002937;IPR014105;IPR008150	Amino_oxidase;CrtI_fam;Phytoene_DH_bac_CS	ko00906
*	RCAP_rcc00684	P17060	Geranylgeranyl diphosphate synthase (GGPP synthase) (EC 2.5.1.29) (Farnesyltranstransferase)	crtE	289	Cytoplasmic					carotenoid biosynthetic process [GO:0016117]; chlorophyll biosynthetic process [GO:0015995]; geranylgeranyl diphosphate biosynthetic process [GO:0033386]; photosynthesis [GO:0015979]	farnesyltranstransferase activity [GO:0004311]; metal ion binding [GO:0046872]		IPR008949;IPR000092;IPR017446	Isoprenoid_synthase_dom;Polyprenyl_synt;Polyprenyl_synth-rel	ko00900
*	RCAP_rcc00685	D5AP78	Demethylspheroidene O-methyltransferase (EC 2.1.1.210) (Hydroxyneurosporene methyltransferase)	crtF	393	Cytoplasmic					carotenoid biosynthetic process [GO:0016117]; chlorophyll biosynthetic process [GO:0015995]; photosynthesis [GO:0015979]	O-methyltransferase activity [GO:0008171]		IPR016461;IPR001077;IPR029063;IPR011991	O-MeTrfase_COMT;O_MeTrfase_2;SAM-dependent_MTases;WHTH_DNA-bd_dom	ko00906
*	RCAP_rcc00686	D5AP79	2-desacetyl-2-hydroxyethyl bacteriochlorophyllide A dehydrogenase (EC 1.-.-.-)	bchC	314	Unknown	TIGR01202;	191	Biosynthesis of cofactors, prosthetic groups, and carriers	Chlorophyll and bacteriochlorphyll	light-independent bacteriochlorophyll biosynthetic process [GO:0036070]; photosynthesis [GO:0015979]	2-desacetyl-2-hydroxyethyl bacteriochlorophyllide a dehydrogenase activity [GO:0036354]		IPR002085;IPR005903;IPR011032;IPR016040	ADH_SF_Zn-type;BchC;GroES-like;NAD(P)-bd_dom	ko00860
*	RCAP_rcc00687	P26177	Chlorophyllide reductase 35.5 kDa chain (EC 1.3.7.15) (Chlorin reductase)	bchX	333	Cytoplasmic	TIGR02016;	164	Energy metabolism	Photosynthesis	bacteriochlorophyll biosynthetic process [GO:0030494]; photosynthesis [GO:0015979]	4 iron, 4 sulfur cluster binding [GO:0051539]; ATP binding [GO:0005524]; metal ion binding [GO:0046872]; oxidoreductase activity, acting on the CH-CH group of donors, NAD or NADP as acceptor [GO:0016628]		IPR010246;IPR030655;IPR000392;IPR027417	BchX;NifH/chlL_CS;Nitogenase_NifH/Reductase_ChlL;P-loop_NTPase	ko00860
*	RCAP_rcc00688	P26178	Chlorophyllide reductase 52.5 kDa chain (EC 1.3.7.15) (Chlorin reductase)	bchY	497	Cytoplasmic	TIGR02015;	164	Energy metabolism	Photosynthesis	light-independent bacteriochlorophyll biosynthetic process [GO:0036070]; photosynthesis [GO:0015979]	oxidoreductase activity, acting on iron-sulfur proteins as donors, NAD or NADP as acceptor [GO:0016731]	integral component of membrane [GO:0016021]; plasma membrane [GO:0005886]	IPR010245;IPR000510;IPR016209	BchY;Nase/OxRdtase_comp1;Protochlorophyllide_Rdtase	ko00860
*	RCAP_rcc00689	P26179	Chlorophyllide reductase subunit Z (EC 1.3.7.15) (Chlorin reductase subunit Z)	bchZ	490	Cytoplasmic	TIGR02014;	164	Energy metabolism	Photosynthesis	bacteriochlorophyll biosynthetic process [GO:0030494]; photosynthesis [GO:0015979]	oxidoreductase activity, acting on iron-sulfur proteins as donors [GO:0016730]		IPR010244;IPR000510;IPR013580;IPR016209	BchZ;Nase/OxRdtase_comp1;P-CP/CP_red_C;Protochlorophyllide_Rdtase	ko00860
*	RCAP_rcc00690	D5AP83	Protein pufQ	pufQ	74	Unknown					bacteriochlorophyll biosynthetic process [GO:0030494]; photosynthesis [GO:0015979]			IPR008800	PufQ_cyt-su
	RCAP_rcc00691	D5AP84	Light-harvesting protein B-870, beta subunit	pufB	49	Cytoplasmic Membrane					photosynthesis, light reaction [GO:0019684]; protein-chromophore linkage [GO:0018298]	bacteriochlorophyll binding [GO:0042314]; electron transporter, transferring electrons within the cyclic electron transport pathway of photosynthesis activity [GO:0045156]; metal ion binding [GO:0046872]	integral component of membrane [GO:0016021]; plasma membrane [GO:0005886]; plasma membrane light-harvesting complex [GO:0030077]	IPR000066;IPR002362;IPR023623	Antenna_a/b;Antenna_beta;Antenna_beta_CS
*	RCAP_rcc00692	D5AP85	Light-harvesting protein B-870, alpha subunit	pufA	58	Cytoplasmic Membrane					photosynthesis, light reaction [GO:0019684]; protein-chromophore linkage [GO:0018298]	bacteriochlorophyll binding [GO:0042314]; electron transporter, transferring electrons within the cyclic electron transport pathway of photosynthesis activity [GO:0045156]; metal ion binding [GO:0046872]	integral component of membrane [GO:0016021]; organelle inner membrane [GO:0019866]; plasma membrane [GO:0005886]; plasma membrane light-harvesting complex [GO:0030077]	IPR000066;IPR018332;IPR002361	Antenna_a/b;Antenna_alpha;Antenna_alpha_CS
*	RCAP_rcc00693	D5AP86	Photosynthetic reaction center, L subunit	pufL	282	Cytoplasmic Membrane	TIGR01157;	112	Energy metabolism	Electron transport	photosynthetic electron transport in photosystem II [GO:0009772]	electron transporter, transferring electrons within the cyclic electron transport pathway of photosynthesis activity [GO:0045156]	integral component of membrane [GO:0016021]; plasma membrane light-harvesting complex [GO:0030077]	IPR005871;IPR000484	Photo_RC_L;Photo_RC_L/M
*	RCAP_rcc00694	D5AP87	Reaction center protein M chain (Photosynthetic reaction center M subunit)	pufM	307	Cytoplasmic Membrane	TIGR01115;	112	Energy metabolism	Electron transport	photosynthetic electron transport in photosystem II [GO:0009772]; protein-chromophore linkage [GO:0018298]	bacteriochlorophyll binding [GO:0042314]; electron transporter, transferring electrons within the cyclic electron transport pathway of photosynthesis activity [GO:0045156]; metal ion binding [GO:0046872]	integral component of membrane [GO:0016021]; plasma membrane-derived chromatophore membrane [GO:0042717]; plasma membrane light-harvesting complex [GO:0030077]	IPR000484;IPR005781	Photo_RC_L/M;Photo_RC_M
*	RCAP_rcc00695	D5AP88	Intrinsic membrane protein PufX	pufX	78	Cytoplasmic Membrane							integral component of membrane [GO:0016021]	IPR020169	Intrinsic_membrane_PufX
*	RCAP_rcc00696	D5AP89	1-deoxy-D-xylulose-5-phosphate synthase (EC 2.2.1.7) (1-deoxyxylulose-5-phosphate synthase) (DXP synthase) (DXPS)	dxs	641	Cytoplasmic	TIGR00204;	76	Biosynthesis of cofactors, prosthetic groups, and carriers	Other	1-deoxy-D-xylulose 5-phosphate biosynthetic process [GO:0052865]; terpenoid biosynthetic process [GO:0016114]; thiamine biosynthetic process [GO:0009228]	1-deoxy-D-xylulose-5-phosphate synthase activity [GO:0008661]; magnesium ion binding [GO:0000287]; thiamine pyrophosphate binding [GO:0030976]		IPR005477;IPR029061;IPR000399;IPR009014;IPR005475;IPR020826;IPR005476;IPR005474	Dxylulose-5-P_synthase;THDP-binding;TPP-bd_CS;Transketo_C/Pyr-ferredox_oxred;Transketolase-like_Pyr-bd;Transketolase_BS;Transketolase_C;Transketolase_N	ko00900
	RCAP_rcc00697	D5AP90	Uncharacterized protein	RCAP_rcc00697	186	Unknown
*	RCAP_rcc00698	D5AP91	Uncharacterized protein	RCAP_rcc00698	224	Unknown							integral component of membrane [GO:0016021]; plasma membrane [GO:0005886]	IPR018764	Anti-sigma_K_RskA
*	RCAP_rcc00699	D5AP92	RNA polymerase sigma-24 factor	rpoE	181	Cytoplasmic	TIGR02937;	179	Central intermediary metabolism	Nitrogen fixation	DNA-templated transcription, initiation [GO:0006352]	DNA binding [GO:0003677]; DNA-binding transcription factor activity [GO:0003700]; sigma factor activity [GO:0016987]		IPR014284;IPR007627;IPR013249;IPR013325;IPR013324;IPR011991	RNA_pol_sigma-70_dom;RNA_pol_sigma70_r2;RNA_pol_sigma70_r4_t2;RNA_pol_sigma_r2;RNA_pol_sigma_r3_r4;WHTH_DNA-bd_dom	ko03020
*	RCAP_rcc00700	D5AP93	Membrane protein, putative	RCAP_rcc00700	235	Cytoplasmic Membrane							integral component of membrane [GO:0016021]
*	RCAP_rcc00701	D5AP94	Glutathione peroxidase	bsaA1	183	Periplasmic					response to oxidative stress [GO:0006979]	glutathione peroxidase activity [GO:0004602]		IPR000889;IPR029759;IPR012336	Glutathione_peroxidase;GPX_AS;Thioredoxin-like_fold	ko00480;ko00590
	RCAP_rcc00702	D5AP95	Uncharacterized protein	RCAP_rcc00702	46	Unknown								IPR017136	UCP037205
*	RCAP_rcc00703	D5AP96	Deoxyribodipyrimidine photolyase-related protein (EC 4.1.99.3)	RCAP_rcc00703	519	Cytoplasmic						deoxyribodipyrimidine photo-lyase activity [GO:0003904]		IPR007357;IPR005101	Photolyase-related;Photolyase_FAD-bd/Cryptochr_C
*	RCAP_rcc00704	D5AP97	Oligopeptide ABC transporter, permease protein OppC-1	oppC1	302	Cytoplasmic Membrane					transmembrane transport [GO:0055085]		integral component of membrane [GO:0016021]; plasma membrane [GO:0005886]	IPR000515;IPR025966	MetI-like;OppC_N	ko02010
*	RCAP_rcc00705	D5AP98	Oligopeptide ABC transporter, permease protein OppB-1	oppB1	335	Cytoplasmic Membrane					transmembrane transport [GO:0055085]		integral component of membrane [GO:0016021]; plasma membrane [GO:0005886]	IPR000515	MetI-like	ko02010
*	RCAP_rcc00706	D5AP99	Oligopeptide ABC transporter, periplasmic oligopeptide-binding protein OppA-1	oppA1	567	Periplasmic					transmembrane transport [GO:0055085]		ATP-binding cassette (ABC) transporter complex [GO:0043190]	IPR030678;IPR000914	Peptide/Ni-bd;SBP_5_dom	ko02010
*	RCAP_rcc00707	D5APA0	Oligopeptide ABC transporter, ATP-binding protein OppF (EC 3.6.3.23)	oppF	336	Cytoplasmic Membrane	TIGR01727;	142	Transport and binding proteins	Amino acids, peptides and amines		ATP binding [GO:0005524]; oligopeptide-transporting ATPase activity [GO:0015421]		IPR003593;IPR003439;IPR017871;IPR010066;IPR013563;IPR027417	AAA+_ATPase;ABC_transporter-like;ABC_transporter_CS;Oligo_ATP-bd_C;Oligopep_ABC_C;P-loop_NTPase	ko02010
*	RCAP_rcc00708	D5APA1	Oligopeptide ABC transporter, ATP-binding protein OppD-1 (EC 3.6.3.23)	oppD1	341	Cytoplasmic Membrane	TIGR01727;	142	Transport and binding proteins	Amino acids, peptides and amines		ATP binding [GO:0005524]; oligopeptide-transporting ATPase activity [GO:0015421]		IPR003593;IPR003439;IPR017871;IPR010066;IPR013563;IPR027417	AAA+_ATPase;ABC_transporter-like;ABC_transporter_CS;Oligo_ATP-bd_C;Oligopep_ABC_C;P-loop_NTPase	ko02010
*	RCAP_rcc00709	D5APA2	FAD dependent oxidoreductase	RCAP_rcc00709	446	Cytoplasmic						oxidoreductase activity [GO:0016491]		IPR006076	FAD-dep_OxRdtase
*	RCAP_rcc00710	D5APA3	Hippurate hydrolase (EC 3.5.1.32)	hipO	388	Cytoplasmic	TIGR01891;	138	Protein fate	Degradation of proteins, peptides, and glycopeptides		hippurate hydrolase activity [GO:0047980]		IPR017439;IPR002933;IPR011650	Amidohydrolase;Peptidase_M20;Peptidase_M20_dimer	ko00360
*	RCAP_rcc00711	D5APA4	Universal stress family protein	RCAP_rcc00711	135	Unknown								IPR014729;IPR006015;IPR006016	Rossmann-like_a/b/a_fold;Universal_stress_UspA;UspA
	RCAP_rcc00712	D5APA5	GTP 3',8-cyclase (EC 4.1.99.22) (Molybdenum cofactor biosynthesis protein A)	moaA	333	Cytoplasmic	TIGR02666;	82	Biosynthesis of cofactors, prosthetic groups, and carriers	Molybdopterin	Mo-molybdopterin cofactor biosynthetic process [GO:0006777]	4 iron, 4 sulfur cluster binding [GO:0051539]; GTP 3',8'-cyclase activity [GO:0061798]; GTP binding [GO:0005525]; metal ion binding [GO:0046872]; S-adenosyl-L-methionine binding [GO:1904047]	molybdopterin synthase complex [GO:0019008]	IPR013785;IPR006638;IPR013483;IPR000385;IPR010505;IPR007197	Aldolase_TIM;Elp3/MiaB/NifB;MoaA;MoaA_NifB_PqqE_Fe-S-bd_CS;Mob_synth_C;rSAM	ko00790;ko04122
*	RCAP_rcc00713	D5APA6	Kynureninase (EC 3.7.1.3) (L-kynurenine hydrolase)	kynU	398	Cytoplasmic	TIGR01814;	109	Energy metabolism	Amino acids and amines	'de novo' NAD biosynthetic process from tryptophan [GO:0034354]; anthranilate metabolic process [GO:0043420]; L-kynurenine catabolic process [GO:0097053]; quinolinate biosynthetic process [GO:0019805]; tryptophan catabolic process [GO:0006569]	kynureninase activity [GO:0030429]; pyridoxal phosphate binding [GO:0030170]	cytoplasm [GO:0005737]	IPR000192;IPR010111;IPR015424;IPR015421;IPR015422	Aminotrans_V_dom;Kynureninase;PyrdxlP-dep_Trfase;PyrdxlP-dep_Trfase_major_sub1;PyrdxlP-dep_Trfase_major_sub2	ko00380
	RCAP_rcc00714	D5APA7	Membrane protein, putative	RCAP_rcc00714	151	Cytoplasmic Membrane							integral component of membrane [GO:0016021]	IPR007318	Phopholipid_MeTrfase
*	RCAP_rcc00715	D5APA8	NAD(P) transhydrogenase subunit alpha (EC 7.1.1.1)	pntA	524	Cytoplasmic Membrane	TIGR00561;	112	Energy metabolism	Electron transport	proton transmembrane transport [GO:1902600]	NAD(P)+ transhydrogenase activity [GO:0008746]; nucleotide binding [GO:0000166]	integral component of membrane [GO:0016021]	IPR007886;IPR007698;IPR026255;IPR024605	AlaDH/PNT_N;AlaDH/PNT_NAD(H)-bd;NADP_transhyd_a;NADP_transhyd_a_C	ko00760
*	RCAP_rcc00716	D5APA9	NAD(P) transhydrogenase subunit beta (EC 7.1.1.1) (Nicotinamide nucleotide transhydrogenase subunit beta)	pntB	478	Cytoplasmic Membrane						NAD(P)+ transhydrogenase (AB-specific) activity [GO:0008750]; NADP binding [GO:0050661]	integral component of membrane [GO:0016021]; plasma membrane [GO:0005886]	IPR029035;IPR012136	DHS-like_NAD/FAD-binding_dom;NADH_DH_b	ko00760
	RCAP_rcc00717	D5APB0	Probable membrane transporter protein	RCAP_rcc00717	246	Cytoplasmic Membrane							integral component of membrane [GO:0016021]; plasma membrane [GO:0005886]	IPR002781	TM_pro_TauE_like
*	RCAP_rcc00718	D5APB1	Malate dehydrogenase (EC 1.1.1.37)	mdh	320	Cytoplasmic	TIGR01763;	120	Energy metabolism	TCA cycle	carbohydrate metabolic process [GO:0005975]; tricarboxylic acid cycle [GO:0006099]	L-malate dehydrogenase activity [GO:0030060]		IPR001557;IPR022383;IPR001236;IPR015955;IPR011275;IPR016040	L-lactate/malate_DH;Lactate/malate_DH_C;Lactate/malate_DH_N;Lactate_DH/Glyco_Ohase_4_C;Malate_DH_type3;NAD(P)-bd_dom	ko00020;ko00620;ko00630;ko00680;ko00710;ko00720
	RCAP_rcc00719	D5APB2	Uncharacterized protein	RCAP_rcc00719	349	Cytoplasmic
*	RCAP_rcc00720	D5APB3	Succinate--CoA ligase [ADP-forming] subunit beta (EC 6.2.1.5) (Succinyl-CoA synthetase subunit beta) (SCS-beta)	sucC	397	Cytoplasmic	TIGR01016;	120	Energy metabolism	TCA cycle	tricarboxylic acid cycle [GO:0006099]	ATP binding [GO:0005524]; magnesium ion binding [GO:0000287]; succinate-CoA ligase (ADP-forming) activity [GO:0004775]		IPR011761;IPR013650;IPR013815;IPR013816;IPR005811;IPR017866;IPR005809;IPR016102	ATP-grasp;ATP-grasp_succ-CoA_synth-type;ATP_grasp_subdomain_1;ATP_grasp_subdomain_2;CoA_ligase;Succ-CoA_synthase_bsu_CS;Succ_CoA_synthase_bsu;Succinyl-CoA_synth-like	ko00020;ko00640;ko00660;ko00720
*	RCAP_rcc00721	D5APB4	Succinate--CoA ligase [ADP-forming] subunit alpha (EC 6.2.1.5) (Succinyl-CoA synthetase subunit alpha) (SCS-alpha)	sucD	294	Cytoplasmic	TIGR01019;	120	Energy metabolism	TCA cycle	tricarboxylic acid cycle [GO:0006099]	cofactor binding [GO:0048037]; nucleotide binding [GO:0000166]; succinate-CoA ligase (ADP-forming) activity [GO:0004775]		IPR017440;IPR003781;IPR005810;IPR005811;IPR016040;IPR016102	Cit_synth/succinyl-CoA_lig_AS;CoA-bd;CoA_lig_alpha;CoA_ligase;NAD(P)-bd_dom;Succinyl-CoA_synth-like	ko00020;ko00640;ko00660;ko00720
*	RCAP_rcc00722	D5APB5	Lipoprotein, putative	RCAP_rcc00722	106	Unknown
*	RCAP_rcc00723	D5APB6	Lipoprotein, putative	RCAP_rcc00723	122	Unknown
*	RCAP_rcc00724	D5APB7	Oxoglutarate dehydrogenase (Succinyl-transferring), E1 component (EC 1.2.4.2)	sucA	989	Cytoplasmic	TIGR00239;	120	Energy metabolism	TCA cycle	tricarboxylic acid cycle [GO:0006099]	oxoglutarate dehydrogenase (succinyl-transferring) activity [GO:0004591]; thiamine pyrophosphate binding [GO:0030976]		IPR011603;IPR001017;IPR029061;IPR005475	2oxoglutarate_DH_E1;DH_E1;THDP-binding;Transketolase-like_Pyr-bd	ko00020;ko00310;ko00380
*	RCAP_rcc00725	D5APB8	Dihydrolipoyllysine-residue succinyltransferase component of 2-oxoglutarate dehydrogenase complex (EC 2.3.1.61) (2-oxoglutarate dehydrogenase complex component E2)	sucB	517	Cytoplasmic	TIGR01347;	120	Energy metabolism	TCA cycle	L-lysine catabolic process to acetyl-CoA via saccharopine [GO:0033512]; tricarboxylic acid cycle [GO:0006099]	dihydrolipoyllysine-residue succinyltransferase activity [GO:0004149]	oxoglutarate dehydrogenase complex [GO:0045252]	IPR003016;IPR001078;IPR000089;IPR023213;IPR004167;IPR011053;IPR006255	2-oxoA_DH_lipoyl-BS;2-oxoacid_DH_actylTfrase;Biotin_lipoyl;CAT-like_dom;E3-bd;Single_hybrid_motif;SucB	ko00020;ko00310
*	RCAP_rcc00726	D5APB9	Dihydrolipoyl dehydrogenase (EC 1.8.1.4)	lpdA1	462	Cytoplasmic	TIGR01350;	118	Energy metabolism	Pyruvate dehydrogenase	cell redox homeostasis [GO:0045454]	dihydrolipoyl dehydrogenase activity [GO:0004148]; electron transfer activity [GO:0009055]; flavin adenine dinucleotide binding [GO:0050660]	cell [GO:0005623]	IPR016156;IPR006258;IPR004099;IPR023753;IPR012999;IPR001327	FAD/NAD-linked_Rdtase_dimer;Lipoamide_DH;Pyr_nucl-diS_OxRdtase_dimer;Pyr_nucl-diS_OxRdtase_FAD/NAD;Pyr_OxRdtase_I_AS;Pyr_OxRdtase_NAD-bd_dom	ko00010;ko00020;ko00260;ko00280;ko00620
*	RCAP_rcc00727	D5APC0	Citrate lyase, beta subunit-1 (EC 4.1.3.34) (EC 4.1.3.6)	citE1	288	Cytoplasmic						citrate (pro-3S)-lyase activity [GO:0008815]; citryl-CoA lyase activity [GO:0008816]; metal ion binding [GO:0046872]		IPR005000;IPR011206;IPR015813	Aldolase/citrate-lyase_domain;Citrate_lyase_beta/mcl1/mcl2;Pyrv/PenolPyrv_Kinase-like_dom	ko00630
*	RCAP_rcc00728	D5APC1	NnrU family protein	RCAP_rcc00728	188	Cytoplasmic Membrane							integral component of membrane [GO:0016021]	IPR009915	NnrU
*	RCAP_rcc00729	D5APC2	Uncharacterized protein	RCAP_rcc00729	67	Unknown								IPR013619	DUF1737
*	RCAP_rcc00730	D5APC3	MaoC domain protein	maoC	345	Cytoplasmic								IPR029069;IPR016790	HotDog_dom;Thiol_ester_hydratase_Rv0216	ko00630;ko00720
*	RCAP_rcc00731	D5APC4	Succinate dehydrogenase, cytochrome b556 subunit (EC 1.3.99.1)	sdhC	132	Cytoplasmic Membrane	TIGR02970;	120	Energy metabolism	TCA cycle	tricarboxylic acid cycle [GO:0006099]	electron transfer activity [GO:0009055]; metal ion binding [GO:0046872]; succinate dehydrogenase activity [GO:0000104]	integral component of membrane [GO:0016021]; succinate dehydrogenase complex [GO:0045281]	IPR018495;IPR014314;IPR000701	Succ_DH_cyt_bsu_CS;Succ_DH_cytb556;Succ_DH_Fumarate_Rdtase_TM-su	ko00020;ko00190;ko00623;ko00650;ko00720
	RCAP_rcc00732	D5APC5	Succinate dehydrogenase, hydrophobic membrane anchor protein (EC 1.3.99.1)	sdhD	133	Cytoplasmic Membrane	TIGR02968;	120	Energy metabolism	TCA cycle	tricarboxylic acid cycle [GO:0006099]	heme binding [GO:0020037]; succinate dehydrogenase activity [GO:0000104]	integral component of membrane [GO:0016021]	IPR014312;IPR000701	Succ_DH_anchor;Succ_DH_Fumarate_Rdtase_TM-su	ko00020;ko00190;ko00623;ko00650;ko00720
*	RCAP_rcc00733	D5APC6	Succinate dehydrogenase flavoprotein subunit (EC 1.3.5.1)	sdhA	601	Cytoplasmic Membrane	TIGR01816;TIGR01812;	120	Energy metabolism	TCA cycle	electron transport chain [GO:0022900]; tricarboxylic acid cycle [GO:0006099]	flavin adenine dinucleotide binding [GO:0050660]; succinate dehydrogenase (ubiquinone) activity [GO:0008177]	plasma membrane [GO:0005886]	IPR003953;IPR003952;IPR015939;IPR027477;IPR011281;IPR014006	FAD_bind_dom;FRD_SDH_FAD_BS;Fum_Rdtase/Succ_DH_flav-like_C;Succ_DH/fumarate_Rdtase_cat;Succ_DH_flav_su_fwd;Succ_Dhase_FrdA_Gneg	ko00020;ko00190;ko00623;ko00650;ko00720
*	RCAP_rcc00734	D5APC7	Lipoprotein, putative	RCAP_rcc00734	100	Unknown
*	RCAP_rcc00735	D5APC8	Uncharacterized protein	RCAP_rcc00735	390	Cytoplasmic						transferase activity, transferring glycosyl groups [GO:0016757]		IPR007657	Glycosyltransferase_AER61
*	RCAP_rcc00736	D5APC9	Succinate dehydrogenase iron-sulfur subunit (EC 1.3.5.1)	sdhB	259	Cytoplasmic Membrane	TIGR00384;	108	Energy metabolism	Aerobic	tricarboxylic acid cycle [GO:0006099]	2 iron, 2 sulfur cluster binding [GO:0051537]; 3 iron, 4 sulfur cluster binding [GO:0051538]; 4 iron, 4 sulfur cluster binding [GO:0051539]; electron transfer activity [GO:0009055]; metal ion binding [GO:0046872]; succinate dehydrogenase (ubiquinone) activity [GO:0008177]		IPR001041;IPR006058;IPR017896;IPR017900;IPR012675;IPR009051;IPR004489;IPR025192	2Fe-2S_ferredoxin-type;2Fe2S_fd_BS;4Fe4S_Fe-S-bd;4Fe4S_Fe_S_CS;Beta-grasp_dom;Helical_ferredxn;Succ_DH/fum_Rdtase_Fe-S;Succ_DH/fum_Rdtase_N	ko00020;ko00190;ko00623;ko00650;ko00720
	RCAP_rcc00737	D5APD0	Uncharacterized protein	RCAP_rcc00737	54	Unknown
*	RCAP_rcc00738	D5APD1	Uncharacterized protein	RCAP_rcc00738	290	Cytoplasmic								IPR018959	DUF1989
	RCAP_rcc00739	D5APD2	Transcriptional regulator, ArsR family	RCAP_rcc00739	115	Unknown						DNA-binding transcription factor activity [GO:0003700]		IPR001845;IPR011991	HTH_ArsR_DNA-bd_dom;WHTH_DNA-bd_dom
*	RCAP_rcc00740	D5APD3	ATP synthase protein I	atpI	114	Unknown					ion transport [GO:0006811]	hydrolase activity [GO:0016787]	integral component of membrane [GO:0016021]; proton-transporting ATP synthase complex, coupling factor F(o) [GO:0045263]	IPR016989	Atp1_alphaprobac
*	RCAP_rcc00741	D5APD4	ATP synthase subunit a (ATP synthase F0 sector subunit a) (F-ATPase subunit 6)	atpB	258	Cytoplasmic Membrane	TIGR01131;	111	Energy metabolism	ATP-proton motive force interconversion	ATP synthesis coupled proton transport [GO:0015986]	proton-transporting ATP synthase activity, rotational mechanism [GO:0046933]	integral component of membrane [GO:0016021]; plasma membrane [GO:0005886]; proton-transporting ATP synthase complex, coupling factor F(o) [GO:0045263]	IPR000568;IPR023011	ATPase_F0-cplx_asu;ATPase_F0-cplx_asu_AS	ko00190;ko00195
	RCAP_rcc00742	D5APD5	ATP synthase subunit c (ATP synthase F(0) sector subunit c) (F-type ATPase subunit c) (F-ATPase subunit c) (Lipid-binding protein)	atpE	78	Cytoplasmic Membrane	TIGR01260;	111	Energy metabolism	ATP-proton motive force interconversion	ATP hydrolysis coupled proton transport [GO:0015991]; ATP synthesis coupled proton transport [GO:0015986]	lipid binding [GO:0008289]; proton-transporting ATP synthase activity, rotational mechanism [GO:0046933]	integral component of membrane [GO:0016021]; plasma membrane [GO:0005886]; proton-transporting ATP synthase complex, coupling factor F(o) [GO:0045263]	IPR000454;IPR005953;IPR002379	ATPase_F0-cplx_csu;ATPase_F0-cplx_csu_bac/chlpt;ATPase_proteolipid_c_like_dom	ko00190;ko00195
*	RCAP_rcc00743	D5APD6	ATP synthase subunit b (ATP synthase F(0) sector subunit b) (ATPase subunit I) (F-type ATPase subunit b) (F-ATPase subunit b)	atpX	186	Unknown					ATP synthesis coupled proton transport [GO:0015986]	proton-transporting ATP synthase activity, rotational mechanism [GO:0046933]	integral component of membrane [GO:0016021]; plasma membrane [GO:0005886]; proton-transporting ATP synthase complex, coupling factor F(o) [GO:0045263]	IPR002146	ATPase_F0-cplx_b/b'su_bac	ko00190;ko00195
*	RCAP_rcc00744	D5APD7	ATP synthase subunit b (ATP synthase F(0) sector subunit b) (ATPase subunit I) (F-type ATPase subunit b) (F-ATPase subunit b)	atpF	185	Unknown					ATP synthesis coupled proton transport [GO:0015986]	proton-transporting ATP synthase activity, rotational mechanism [GO:0046933]	integral component of membrane [GO:0016021]; plasma membrane [GO:0005886]; proton-transporting ATP synthase complex, coupling factor F(o) [GO:0045263]	IPR002146	ATPase_F0-cplx_b/b'su_bac	ko00190;ko00195
*	RCAP_rcc00745	D5APD8	Polyhydroxyalkanoate depolymerase (EC 3.1.1.75)	phaZ	422	Unknown	TIGR01849;	177	Fatty acid and phospholipid metabolism	Degradation		poly(3-hydroxybutyrate) depolymerase activity [GO:0050526]		IPR029058;IPR009656;IPR010915	AB_hydrolase;PHB_depo_C;PHB_depoly_PhaZ
*	RCAP_rcc00746	D5APD9	Poly(3-hydroxyalkanoate) polymerase (EC 2.3.1.-)	phbC	597	Cytoplasmic	TIGR01838;	176	Fatty acid and phospholipid metabolism	Biosynthesis	poly-hydroxybutyrate biosynthetic process [GO:0042619]	transferase activity, transferring acyl groups [GO:0016746]	cytoplasm [GO:0005737]	IPR029058;IPR010963;IPR010941	AB_hydrolase;PHA_synth_I;PhaC_cen_dom	ko00650
*	RCAP_rcc00747	D5APE0	Uncharacterized protein	RCAP_rcc00747	148	Periplasmic
*	RCAP_rcc00748	D5APE1	Polyhydroxyalkanoate synthesis repressor PhaR	phaR	180	Cytoplasmic	TIGR01848;	176	Fatty acid and phospholipid metabolism	Biosynthesis	regulation of transcription, DNA-templated [GO:0006355]			IPR012909;IPR010134;IPR007897	PHA_DNA-bd_N;PHA_reg_PhaR;PHB_accumulat
*	RCAP_rcc00749	D5APE2	Transcriptional regulator, LysR family	RCAP_rcc00749	314	Cytoplasmic						DNA binding [GO:0003677]; DNA-binding transcription factor activity [GO:0003700]		IPR005119;IPR000847;IPR011991	LysR_subst-bd;Tscrpt_reg_HTH_LysR;WHTH_DNA-bd_dom
*	RCAP_rcc00750	D5APE3	CTP synthase (EC 6.3.4.2) (Cytidine 5'-triphosphate synthase) (Cytidine triphosphate synthetase) (CTP synthetase) (CTPS) (UTP--ammonia ligase)	pyrG	547	Cytoplasmic	TIGR00337;	126	Purines, pyrimidines, nucleosides, and nucleotides	Pyrimidine ribonucleotide biosynthesis	'de novo' CTP biosynthetic process [GO:0044210]; glutamine metabolic process [GO:0006541]	ATP binding [GO:0005524]; CTP synthase activity [GO:0003883]; metal ion binding [GO:0046872]		IPR029062;IPR004468;IPR017456;IPR017926;IPR027417	Class_I_gatase-like;CTP_synthase;CTP_synthase_N;GATASE;P-loop_NTPase	ko00240
	RCAP_rcc00751	D5APE4	Protein-export membrane protein SecG	secG	147	Cytoplasmic Membrane	TIGR00810;	97	Protein fate	Protein and peptide secretion and trafficking	protein secretion [GO:0009306]	P-P-bond-hydrolysis-driven protein transmembrane transporter activity [GO:0015450]	integral component of membrane [GO:0016021]	IPR004692	SecG	ko03060;ko03070
*	RCAP_rcc00752	D5APE5	Adenylosuccinate synthetase (AMPSase) (AdSS) (EC 6.3.4.4) (IMP--aspartate ligase)	purA	430	Cytoplasmic	TIGR00184;	125	Purines, pyrimidines, nucleosides, and nucleotides	Purine ribonucleotide biosynthesis	'de novo' AMP biosynthetic process [GO:0044208]	adenylosuccinate synthase activity [GO:0004019]; GTP binding [GO:0005525]; magnesium ion binding [GO:0000287]	cytoplasm [GO:0005737]	IPR018220;IPR001114;IPR027417	Adenylosuccinate_synthase_AS;Adenylosuccinate_synthetase;P-loop_NTPase	ko00230;ko00250
	RCAP_rcc00753	D5APE6	Uncharacterized protein	RCAP_rcc00753	81	Cytoplasmic Membrane							integral component of membrane [GO:0016021]	IPR021265	DUF2842
*	RCAP_rcc00754	D5APE7	Lipoprotein, putative	RCAP_rcc00754	795	Cytoplasmic Membrane
*	RCAP_rcc00755	D5APE8	Thiamine pyrophosphokinase (EC 2.7.6.2)	thiN	223	Unknown	TIGR01378;	162	Biosynthesis of cofactors, prosthetic groups, and carriers	Thiamine	thiamine diphosphate biosynthetic process [GO:0009229]; thiamine metabolic process [GO:0006772]	ATP binding [GO:0005524]; kinase activity [GO:0016301]; thiamine binding [GO:0030975]; thiamine diphosphokinase activity [GO:0004788]		IPR006282;IPR007373;IPR007371	Thi_PPkinase;Thiamin_PyroPKinase_B1-bd;TPK_catalytic	ko00730
	RCAP_rcc00756	D5APE9	Transporter, dme family	RCAP_rcc00756	303	Cytoplasmic Membrane							integral component of membrane [GO:0016021]	IPR000620	EamA_dom
*	RCAP_rcc00757	D5APF0	Hydrolase, alpha/beta fold family	RCAP_rcc00757	246	Unknown						hydrolase activity [GO:0016787]		IPR029058;IPR000073	AB_hydrolase;AB_hydrolase_1
*	RCAP_rcc00758	D5APF1	Hydrolase, alpha/beta fold family	RCAP_rcc00758	233	Cytoplasmic Membrane						hydrolase activity [GO:0016787]		IPR029058;IPR000073	AB_hydrolase;AB_hydrolase_1
*	RCAP_rcc00759	D5APF2	Methyl-accepting chemotaxis protein McpB	mcpB	780	Cytoplasmic Membrane					signal transduction [GO:0007165]		integral component of membrane [GO:0016021]	IPR003660;IPR004089	HAMP_linker_domain;MCPsignal_dom	ko02020;ko02030
*	RCAP_rcc00760	D5APF3	Methyl-accepting chemotaxis protein McpA-1	mcpA1	645	Cytoplasmic Membrane					chemotaxis [GO:0006935]; signal transduction [GO:0007165]	transmembrane signaling receptor activity [GO:0004888]	integral component of membrane [GO:0016021]	IPR004010;IPR004090;IPR003660;IPR004089	Cache_domain;Chemotax_Me-accpt_rcpt;HAMP_linker_domain;MCPsignal_dom	ko02020;ko02030
	RCAP_rcc00761	D5APF4	NAD-reducing hydrogenase HoxS, beta subunit (EC 1.12.1.2)	hoxH	503	Cytoplasmic						DNA binding [GO:0003677]; ferredoxin hydrogenase activity [GO:0008901]; hydrogen dehydrogenase activity [GO:0047985]; nickel cation binding [GO:0016151]		IPR001501;IPR018194;IPR029014	Ni-dep_hyd_lsu;Ni-dep_hyd_lsu_Ni_BS;NiFe_Hase-like
	RCAP_rcc00762	D5APF5	Hydrogenase maturation factor HowW (EC 3.4.23.-)	hoxW	181	Unknown						enzyme activator activity [GO:0008047]; peptidase activity [GO:0008233]		IPR023430	Pept_HybD-like_dom
*	RCAP_rcc00763	D5APF6	Signal transduction histidine kinase HupT (EC 2.7.13.3)	hupT	456	Cytoplasmic Membrane						ATP binding [GO:0005524]; phosphorelay sensor kinase activity [GO:0000155]		IPR003661;IPR003594;IPR001610;IPR000014;IPR000700;IPR013656;IPR004358;IPR005467;IPR009082	EnvZ-like_dim/P;HATPase_C;PAC;PAS;PAS-assoc_C;PAS_4;Sig_transdc_His_kin-like_C;Sig_transdc_His_kinase_core;Sig_transdc_His_kinase_dimeric
*	RCAP_rcc00764	D5APF7	Uptake hydrogenase, small subunit (EC 1.12.99.6)	hupU	332	Periplasmic						3 iron, 4 sulfur cluster binding [GO:0051538]; 4 iron, 4 sulfur cluster binding [GO:0051539]; ferredoxin hydrogenase activity [GO:0008901]; hydrogenase (acceptor) activity [GO:0033748]; metal ion binding [GO:0046872]	ferredoxin hydrogenase complex [GO:0009375]	IPR027394;IPR006137;IPR001821	Cytochrome-c3_hydrogenase_C;NADH_UbQ_OxRdtase-like_20kDa;NiFe_hydrogenase_ssu
*	RCAP_rcc00765	D5APF8	Uptake hydrogenase, large subunit (EC 1.12.99.6)	hupV	476	Unknown						ferredoxin hydrogenase activity [GO:0008901]; hydrogenase (acceptor) activity [GO:0033748]; nickel cation binding [GO:0016151]		IPR001501;IPR018194;IPR029014	Ni-dep_hyd_lsu;Ni-dep_hyd_lsu_Ni_BS;NiFe_Hase-like
	RCAP_rcc00766	D5APF9	Carbamoyltransferase HypF (EC 6.2.-.-)	hypF	739	Cytoplasmic	TIGR00143;	140	Protein fate	Protein modification and repair	protein carbamoylation [GO:0046944]	acylphosphatase activity [GO:0003998]; carboxyl- or carbamoyltransferase activity [GO:0016743]; double-stranded RNA binding [GO:0003725]; zinc ion binding [GO:0008270]		IPR001792;IPR017968;IPR004421;IPR017945;IPR006070;IPR011125	Acylphosphatase-like_dom;Acylphosphatase_CS;Carbamoyltransferase_HypF;DHBP_synth_RibB-like_a/b_dom;YrdC-like_dom;Znf_HypF
*	RCAP_rcc00767	D5APG0	Hydrogenase, small subunit (EC 1.12.99.6)	hupA	358	Cytoplasmic Membrane	TIGR00391;TIGR01409;	112	Energy metabolism	Electron transport		3 iron, 4 sulfur cluster binding [GO:0051538]; 4 iron, 4 sulfur cluster binding [GO:0051539]; ferredoxin hydrogenase activity [GO:0008901]; hydrogenase (acceptor) activity [GO:0033748]; metal ion binding [GO:0046872]	ferredoxin hydrogenase complex [GO:0009375]	IPR027394;IPR006137;IPR001821;IPR006311;IPR019546	Cytochrome-c3_hydrogenase_C;NADH_UbQ_OxRdtase-like_20kDa;NiFe_hydrogenase_ssu;TAT_signal;TAT_signal_bac_arc	ko00633
*	RCAP_rcc00768	D5APG1	Hydrogenase, large subunit (EC 1.12.99.6)	hupB	597	Cytoplasmic Membrane						ferredoxin hydrogenase activity [GO:0008901]; hydrogenase (acceptor) activity [GO:0033748]; nickel cation binding [GO:0016151]		IPR001501;IPR018194;IPR029014	Ni-dep_hyd_lsu;Ni-dep_hyd_lsu_Ni_BS;NiFe_Hase-like	ko00633
*	RCAP_rcc00769	D5APG2	Hydrogenase, cytochrome b subunit (EC 1.12.99.6)	hupC	262	Cytoplasmic Membrane	TIGR02125;	141	Transport and binding proteins	Unknown substrate	respiratory electron transport chain [GO:0022904]	electron transfer activity [GO:0009055]; hydrogenase (acceptor) activity [GO:0033748]; iron ion binding [GO:0005506]	integral component of membrane [GO:0016021]	IPR016174;IPR000516	Di-haem_cyt_TM;Ni-dep_Hydgase_cyt-B
	RCAP_rcc00770	D5APG3	Hydrogenase maturation protease HupD (EC 3.4.23.-)	hupD	210	Cytoplasmic	TIGR00140;TIGR00072;	140	Protein fate	Protein modification and repair	protein processing [GO:0016485]	enzyme activator activity [GO:0008047]; metal ion binding [GO:0046872]; peptidase activity [GO:0008233]		IPR004419;IPR023430;IPR000671	Pept_A31_hyd_express;Pept_HybD-like_dom;Peptidase_A31
	RCAP_rcc00771	D5APG4	Hydrogenase maturation chaperone HupF	hupF	106	Unknown	TIGR00074;	95	Protein fate	Protein folding and stabilization				IPR019812;IPR001109	Hydgase_assmbl_chp_CS;Hydrogenase_HupF/HypC
*	RCAP_rcc00772	D5APG5	Hydrogenase expression/formation protein	hupG	138	Unknown								IPR010893;IPR012336	NiFe-hyd_mat_HyaE;Thioredoxin-like_fold
*	RCAP_rcc00773	D5APG6	Hydrogenase expression/formation protein HupH	hupH	275	Unknown								IPR006894	HupH_Hydgase_express_prot_C
*	RCAP_rcc00774	D5APG7	Rubredoxin HupJ	hupJ	278	Cytoplasmic	TIGR03993;	89	Cell envelope	Biosynthesis and degradation of murein sacculus and peptidoglycan	oxidation-reduction process [GO:0055114]	iron ion binding [GO:0005506]		IPR023994;IPR024934;IPR004039;IPR024935;IPR018527	NiFe-hyd_HybE;Rubredoxin-like_dom;Rubredoxin-type_fold;Rubredoxin_dom;Rubredoxin_Fe_BS
*	RCAP_rcc00775	D5APG8	Hydrogenase expression/formation protein HupK	hupK	294	Unknown								IPR029014	NiFe_Hase-like
*	RCAP_rcc00776	D5APG9	Hydrogenase maturation factor HypA	hypA	113	Cytoplasmic	TIGR00100;	140	Protein fate	Protein modification and repair	cellular protein modification process [GO:0006464]; protein maturation [GO:0051604]	nickel cation binding [GO:0016151]; zinc ion binding [GO:0008270]		IPR000688;IPR020538;IPR001878	Hydgase_Ni_incorp_HypA/HybF;Hydgase_Ni_incorp_HypA/HybF_CS;Znf_CCHC
*	RCAP_rcc00777	D5APH0	Hydrogenase nickel incorporation protein HypB	hypB	335	Cytoplasmic	TIGR00073;	140	Protein fate	Protein modification and repair	protein maturation [GO:0051604]	GTPase activity [GO:0003924]; GTP binding [GO:0005525]; nickel cation binding [GO:0016151]		IPR003495;IPR004392;IPR027417	CobW/HypB/UreG_dom;Hyd_acc_HypB;P-loop_NTPase
*	RCAP_rcc00778	D5APH1	Hydrogenase transcriptional regulator HupR	hupR	492	Cytoplasmic					phosphorelay signal transduction system [GO:0000160]; regulation of transcription, DNA-templated [GO:0006355]	ATP binding [GO:0005524]; sequence-specific DNA binding [GO:0043565]; transcription factor binding [GO:0008134]		IPR011006;IPR009057;IPR002197;IPR027417;IPR001789;IPR002078;IPR025944	CheY-like_superfamily;Homeodomain-like;HTH_Fis;P-loop_NTPase;Sig_transdc_resp-reg_receiver;Sigma_54_int;Sigma_54_int_dom_CS
*	RCAP_rcc00779	D5APH2	Hydrogenase assembly chaperone HypC/HupF	hypC	96	Unknown	TIGR00074;	95	Protein fate	Protein folding and stabilization				IPR019812;IPR001109	Hydgase_assmbl_chp_CS;Hydrogenase_HupF/HypC
*	RCAP_rcc00780	D5APH3	Hydrogenase maturation factor	hypD	377	Cytoplasmic	TIGR00075;	140	Protein fate	Protein modification and repair		metal ion binding [GO:0046872]		IPR002780	Hyd_form_HypD
*	RCAP_rcc00781	D5APH4	Hydrogenase expression/formation protein HypE	hypE	340	Cytoplasmic	TIGR02124;	141	Transport and binding proteins	Unknown substrate				IPR010918;IPR000728;IPR011854;IPR016188	AIR_synth_C_dom;AIR_synth_N_dom;HypE;PurM_N-like
*	RCAP_rcc00782	D5APH5	Protein-glutamate methylesterase (EC 3.1.1.61)	cheR1	1021	Cytoplasmic					chemotaxis [GO:0006935]	phosphorelay response regulator activity [GO:0000156]; protein-glutamate methylesterase activity [GO:0008984]; S-adenosylmethionine-dependent methyltransferase activity [GO:0008757]	cytoplasm [GO:0005737]	IPR022642;IPR000780;IPR022641;IPR000014;IPR013656;IPR029063;IPR000673	CheR_C;CheR_MeTrfase;CheR_N;PAS;PAS_4;SAM-dependent_MTases;Sig_transdc_resp-reg_Me-estase	ko02020;ko02030
*	RCAP_rcc00783	D5APH6	Diguanylate cyclase/phosphodiesterase with PAS/PAC sensor (EC 3.1.4.-)	RCAP_rcc00783	904	Cytoplasmic Membrane	TIGR00254;TIGR00229;	264	Regulatory functions	Small molecule interactions		hydrolase activity [GO:0016787]		IPR001633;IPR000160;IPR029787;IPR001610;IPR000014;IPR013656	EAL_dom;GGDEF_dom;Nucleotide_cyclase;PAC;PAS;PAS_4
*	RCAP_rcc00784	D5APH7	Conserved domain protein	RCAP_rcc00784	68	Cytoplasmic Membrane							integral component of membrane [GO:0016021]
*	RCAP_rcc00785	D5APH8	Sulfide:quinone oxidoreductase (EC 1.8.5.-)	sqr	427	Unknown						oxidoreductase activity [GO:0016491]		IPR023753	Pyr_nucl-diS_OxRdtase_FAD/NAD
*	RCAP_rcc00786	D5APH9	Basic membrane lipoprotein family	RCAP_rcc00786	360	Unknown	TIGR01409;	97	Protein fate	Protein and peptide secretion and trafficking			plasma membrane [GO:0005886]	IPR003760;IPR006311;IPR019546	Bmp;TAT_signal;TAT_signal_bac_arc
*	RCAP_rcc00787	D5API0	Monosacharide ABC transporter, permease protein	RCAP_rcc00787	309	Cytoplasmic Membrane						transmembrane transporter activity [GO:0022857]	integral component of membrane [GO:0016021]; plasma membrane [GO:0005886]	IPR001851	ABC_transp_permease
	RCAP_rcc00788	D5API1	Monosacharide ABC transporter, permease protein	RCAP_rcc00788	359	Cytoplasmic Membrane						transmembrane transporter activity [GO:0022857]	integral component of membrane [GO:0016021]; plasma membrane [GO:0005886]	IPR001851	ABC_transp_permease
*	RCAP_rcc00789	D5API2	Monosacharide ABC transporter, ATP-binding protein (EC 3.6.3.17)	RCAP_rcc00789	505	Cytoplasmic Membrane						ATP binding [GO:0005524]; monosaccharide-transporting ATPase activity [GO:0015407]		IPR003593;IPR003439;IPR017871;IPR030281;IPR027417	AAA+_ATPase;ABC_transporter-like;ABC_transporter_CS;LsrA;P-loop_NTPase
	RCAP_rcc00790	D5API3	Xanthine dehydrogenase accessory protein XdhC	xdhC	312	Cytoplasmic	TIGR02964;	95	Protein fate	Protein folding and stabilization				IPR014308;IPR003777;IPR027051	Xanthine_DH_XdhC;XdhC_CoxI;XdhC_Rossmann_dom
*	RCAP_rcc00791	D5API4	Xanthine dehydrogenase, molybdopterin binding subunit (EC 1.17.1.4)	xdhB	776	Cytoplasmic Membrane	TIGR02965;	122	Purines, pyrimidines, nucleosides, and nucleotides	Other		molybdenum ion binding [GO:0030151]; xanthine dehydrogenase activity [GO:0004854]		IPR000674;IPR008274;IPR014309	Ald_Oxase/Xan_DH_a/b;AldOxase/xan_DH_Mopterin-bd;Xanthine_DH_Mopterin-bd_su	ko00230
	RCAP_rcc00792	D5API5	Xanthine dehydrogenase, small subunit (EC 1.17.1.4)	xdhA	462	Cytoplasmic	TIGR02963;	122	Purines, pyrimidines, nucleosides, and nucleotides	Other		2 iron, 2 sulfur cluster binding [GO:0051537]; electron transfer activity [GO:0009055]; FAD binding [GO:0071949]; metal ion binding [GO:0046872]; xanthine dehydrogenase activity [GO:0004854]; xanthine oxidase activity [GO:0004855]		IPR002888;IPR001041;IPR006058;IPR012675;IPR005107;IPR016169;IPR016166;IPR016167;IPR002346;IPR012175;IPR014307	2Fe-2S-bd;2Fe-2S_ferredoxin-type;2Fe2S_fd_BS;Beta-grasp_dom;CO_DH_flav_C;CO_DH_flavot_FAD-bd_sub2;FAD-bd_2;FAD-bd_2_sub1;Mopterin_DH_FAD-bd;Xanth_DH_ssu_bac;Xanthine_DH_ssu	ko00230
*	RCAP_rcc00793	D5API6	DNA-directed DNA polymerase (EC 2.7.7.7)	dnaE1	1169	Cytoplasmic	TIGR00594;	132	DNA metabolism	DNA replication, recombination, and repair	DNA replication [GO:0006260]	3'-5' exonuclease activity [GO:0008408]; DNA-directed DNA polymerase activity [GO:0003887]		IPR011708;IPR029460;IPR004365;IPR004013;IPR003141;IPR016195;IPR004805	DNA_pol3_alpha;DNAPol_HHH;NA-bd_OB_tRNA;PHP_C;Pol/His_phosphatase_N;Pol/histidinol_Pase-like;PolC_alpha	ko00230;ko00240;ko03030;ko03430;ko03440
*	RCAP_rcc00794	D5API7	SlyX family protein	RCAP_rcc00794	68	Unknown								IPR007236	SlyX
*	RCAP_rcc00795	D5API8	Histidine--tRNA ligase (EC 6.1.1.21) (Histidyl-tRNA synthetase) (HisRS)	hisS	499	Cytoplasmic	TIGR00442;	137	Protein synthesis	tRNA aminoacylation	histidyl-tRNA aminoacylation [GO:0006427]	ATP binding [GO:0005524]; histidine-tRNA ligase activity [GO:0004821]	cytoplasm [GO:0005737]	IPR006195;IPR004154;IPR015807;IPR004516	aa-tRNA-synth_II;Anticodon-bd;His-tRNA-ligase;HisRS/HisZ	ko00970
*	RCAP_rcc00796	D5API9	ATP phosphoribosyltransferase regulatory subunit (EC 2.4.2.17)	hisZ	356	Cytoplasmic						ATP phosphoribosyltransferase activity [GO:0003879]	cytoplasm [GO:0005737]	IPR006195;IPR004516	aa-tRNA-synth_II;HisRS/HisZ	ko00340
*	RCAP_rcc00797	D5APJ0	ATP phosphoribosyltransferase (EC 2.4.2.17)	hisG	235	Cytoplasmic	TIGR00070;	161	Amino acid biosynthesis	Histidine family	histidine biosynthetic process [GO:0000105]	ATP binding [GO:0005524]; ATP phosphoribosyltransferase activity [GO:0003879]	cytoplasm [GO:0005737]	IPR013820;IPR001348	ATP_PRibTrfase_cat;ATP_PRibTrfase_HisG	ko00340
*	RCAP_rcc00798	D5APJ1	D-isomer specific 2-hydroxyacid dehydrogenase family protein	RCAP_rcc00798	312	Cytoplasmic					oxidation-reduction process [GO:0055114]	NAD binding [GO:0051287]		IPR006140;IPR016040	D-isomer_DH_NAD-bd;NAD(P)-bd_dom	ko00260;ko00620;ko00630
	RCAP_rcc00799	D5APJ2	Peptidoglycan glycosyltransferase MrdB (PGT) (EC 2.4.1.129) (Cell elongation protein RodA) (Cell wall polymerase) (Peptidoglycan polymerase) (PG polymerase)	mrdB	379	Cytoplasmic Membrane	TIGR02210;	89	Cell envelope	Biosynthesis and degradation of murein sacculus and peptidoglycan	cell division [GO:0051301]; cell wall organization [GO:0071555]; peptidoglycan biosynthetic process [GO:0009252]; regulation of cell shape [GO:0008360]	peptidoglycan glycosyltransferase activity [GO:0008955]	integral component of plasma membrane [GO:0005887]	IPR018365;IPR001182;IPR011923	Cell_cycle_FtsW-rel_CS;Cell_cycle_FtsW/RodA;RodA_shape
*	RCAP_rcc00800	D5APJ3	Peptidoglycan glycosyltransferase (EC 2.4.1.129)	mrdA	645	Cytoplasmic Membrane	TIGR03423;	89	Cell envelope	Biosynthesis and degradation of murein sacculus and peptidoglycan	peptidoglycan biosynthetic process [GO:0009252]	penicillin binding [GO:0008658]; peptidoglycan glycosyltransferase activity [GO:0008955]; serine-type D-Ala-D-Ala carboxypeptidase activity [GO:0009002]	membrane [GO:0016020]	IPR012338;IPR005311;IPR001460;IPR017790	Beta-lactam/transpept-like;PBP_dimer;PCN-bd_Tpept;Penicillin-binding_protein_2	ko00550
	RCAP_rcc00801	D5APJ4	Membrane protein, putative	RCAP_rcc00801	179	Cytoplasmic Membrane							integral component of membrane [GO:0016021]
*	RCAP_rcc00802	D5APJ5	Cell shape-determining protein MreC (Cell shape protein MreC)	mreC	299	Cytoplasmic Membrane	TIGR00219;	89	Cell envelope	Biosynthesis and degradation of murein sacculus and peptidoglycan	regulation of cell shape [GO:0008360]		integral component of membrane [GO:0016021]	IPR007221	MreC
*	RCAP_rcc00803	D5APJ6	Rod shape-determining protein MreB	mreB	345	Cytoplasmic	TIGR00904;	89	Cell envelope	Biosynthesis and degradation of murein sacculus and peptidoglycan	cell morphogenesis [GO:0000902]			IPR004753	MreB_Mrl
	RCAP_rcc00804	D5APJ7	Na(+)/H(+) antiporter NhaA (Sodium/proton antiporter NhaA)	nhaA	389	Cytoplasmic Membrane	TIGR00773;	145	Transport and binding proteins	Cations and iron carrying compounds	regulation of pH [GO:0006885]	antiporter activity [GO:0015297]; sodium ion transmembrane transporter activity [GO:0015081]	integral component of membrane [GO:0016021]; plasma membrane [GO:0005886]	IPR023171;IPR004670	Na/H_antiporter_dom;NhaA	ko00680
*	RCAP_rcc00805	D5APJ8	Acetyltransferase, GNAT family (EC 2.3.1.-)	RCAP_rcc00805	161	Cytoplasmic Membrane						transferase activity, transferring acyl groups [GO:0016746]		IPR016181;IPR000182	Acyl_CoA_acyltransferase;GNAT_dom	ko00440
*	RCAP_rcc00806	D5APJ9	Heat shock protein DnaJ domain protein	RCAP_rcc00806	234	Cytoplasmic								IPR001623;IPR007791;IPR029024	DnaJ_domain;Heat_shock_DnaJ-like_DjlA;TerB-like
*	RCAP_rcc00807	D5APK0	Endonuclease/exonuclease/phosphatase family protein	RCAP_rcc00807	342	Cytoplasmic						endonuclease activity [GO:0004519]; exonuclease activity [GO:0004527]		IPR005135	Endo/exonuclease/phosphatase
*	RCAP_rcc00808	D5APK1	Uncharacterized protein	RCAP_rcc00808	147	Unknown
*	RCAP_rcc00809	D5APK2	Exopolyphosphatase (EC 3.6.1.11)	ppx	517	Cytoplasmic	TIGR03706;	103	Central intermediary metabolism	Phosphorus compounds	phosphorus metabolic process [GO:0006793]	exopolyphosphatase activity [GO:0004309]		IPR022371;IPR003695	Exopolyphosphatase;Ppx_GppA	ko00230
*	RCAP_rcc00810	D5APK3	Polyphosphate kinase (EC 2.7.4.1) (ATP-polyphosphate phosphotransferase) (Polyphosphoric acid kinase)	ppk	724	Cytoplasmic Membrane	TIGR03705;	103	Central intermediary metabolism	Phosphorus compounds	polyphosphate biosynthetic process [GO:0006799]	ATP binding [GO:0005524]; metal ion binding [GO:0046872]; polyphosphate kinase activity [GO:0008976]	polyphosphate kinase complex [GO:0009358]	IPR003414;IPR024953;IPR025200;IPR025198	PP_kinase;PP_kinase_middle;PPK_C_dom;PPK_N_dom	ko00190;ko03018
*	RCAP_rcc00811	D5APK4	DnaA-like protein Hda	hda	225	Unknown								IPR013317;IPR027417	DnaA_Hda;P-loop_NTPase
*	RCAP_rcc00812	D5APK5	Uncharacterized protein	RCAP_rcc00812	367	Cytoplasmic Membrane							integral component of membrane [GO:0016021]	IPR002549	UPF0118
*	RCAP_rcc00813	D5APK6	Uncharacterized protein	RCAP_rcc00813	87	Cytoplasmic
	RCAP_rcc00814	D5APZ2	Transcriptional regulator, LysR family	RCAP_rcc00814	302	Unknown						DNA binding [GO:0003677]; DNA-binding transcription factor activity [GO:0003700]		IPR005119;IPR000847;IPR011991	LysR_subst-bd;Tscrpt_reg_HTH_LysR;WHTH_DNA-bd_dom
	RCAP_rcc00815	D5APZ3	DoxX family protein	RCAP_rcc00815	141	Cytoplasmic Membrane							integral component of membrane [GO:0016021]	IPR011637	Uncharacterised_YphA
	RCAP_rcc00816	D5APZ4	Extradiol ring-cleavage dioxygenase, class III enzyme, subunit B (EC 1.13.-.-)	RCAP_rcc00816	276	Unknown					cellular aromatic compound metabolic process [GO:0006725]	dioxygenase activity [GO:0051213]; ferrous iron binding [GO:0008198]; oxidoreductase activity, acting on single donors with incorporation of molecular oxygen [GO:0016701]; zinc ion binding [GO:0008270]		IPR014436;IPR004183	Extradiol_dOase_DODA;Xdiol_dOase_suB
*	RCAP_rcc00817	D5APZ5	L-lactate dehydrogenase (EC 1.1.1.27)	ldh	309	Cytoplasmic Membrane	TIGR01771;	110	Energy metabolism	Anaerobic	carbohydrate metabolic process [GO:0005975]; carboxylic acid metabolic process [GO:0019752]	L-lactate dehydrogenase activity [GO:0004459]	cytoplasm [GO:0005737]	IPR001557;IPR011304;IPR018177;IPR022383;IPR001236;IPR015955;IPR016040	L-lactate/malate_DH;L-lactate_DH;L-lactate_DH_AS;Lactate/malate_DH_C;Lactate/malate_DH_N;Lactate_DH/Glyco_Ohase_4_C;NAD(P)-bd_dom	ko00010;ko00270;ko00620;ko00640
	RCAP_rcc00818	D5APZ6	Cell division protein FtsW	ftsW	389	Cytoplasmic Membrane					cell division [GO:0051301]		integral component of membrane [GO:0016021]	IPR001182	Cell_cycle_FtsW/RodA	ko04112
*	RCAP_rcc00819	D5APZ7	UDP-N-acetylglucosamine--N-acetylmuramyl-(pentapeptide) pyrophosphoryl-undecaprenol N-acetylglucosamine transferase (EC 2.4.1.227) (Undecaprenyl-PP-MurNAc-pentapeptide-UDPGlcNAc GlcNAc transferase)	murG	367	Cytoplasmic Membrane					carbohydrate metabolic process [GO:0005975]; cell cycle [GO:0007049]; cell division [GO:0051301]; cell wall organization [GO:0071555]; lipid glycosylation [GO:0030259]; peptidoglycan biosynthetic process [GO:0009252]; regulation of cell shape [GO:0008360]	UDP-N-acetyl-D-glucosamine:N-acetylmuramoyl-L-alanyl-D-glutamyl-meso-2,6-diaminopimelyl-D-alanyl-D-alanine-diphosphoundecaprenol 4-beta-N-acetylglucosaminlytransferase activity [GO:0051991]; undecaprenyldiphospho-muramoylpentapeptide beta-N-acetylglucosaminyltransferase activity [GO:0050511]	plasma membrane [GO:0005886]	IPR006009;IPR007235;IPR004276	GlcNAc_MurG;Glyco_trans_28_C;GlycoTrans_28_N	ko00550;ko04112
*	RCAP_rcc00820	D5APZ8	UDP-N-acetylmuramate--L-alanine ligase (EC 6.3.2.8) (UDP-N-acetylmuramoyl-L-alanine synthetase)	murC	468	Cytoplasmic	TIGR01082;	89	Cell envelope	Biosynthesis and degradation of murein sacculus and peptidoglycan	cell cycle [GO:0007049]; cell division [GO:0051301]; cell wall organization [GO:0071555]; peptidoglycan biosynthetic process [GO:0009252]; regulation of cell shape [GO:0008360]	ATP binding [GO:0005524]; UDP-N-acetylmuramate-L-alanine ligase activity [GO:0008763]	cytoplasm [GO:0005737]	IPR004101;IPR013221;IPR000713;IPR016040;IPR005758	Mur_ligase_C;Mur_ligase_cen;Mur_ligase_N;NAD(P)-bd_dom;UDP-N-AcMur_Ala_ligase_murC	ko00471;ko00550
	RCAP_rcc00821	D5APZ9	Membrane protein, putative	RCAP_rcc00821	79	Cytoplasmic Membrane							integral component of membrane [GO:0016021]	IPR018919	DUF2484
*	RCAP_rcc00822	D5AQ00	UDP-N-acetylenolpyruvoylglucosamine reductase (EC 1.3.1.98) (UDP-N-acetylmuramate dehydrogenase)	murB	306	Cytoplasmic	TIGR00179;	89	Cell envelope	Biosynthesis and degradation of murein sacculus and peptidoglycan	cell cycle [GO:0007049]; cell division [GO:0051301]; cell wall organization [GO:0071555]; peptidoglycan biosynthetic process [GO:0009252]; regulation of cell shape [GO:0008360]	FAD binding [GO:0071949]; UDP-N-acetylmuramate dehydrogenase activity [GO:0008762]	cytoplasm [GO:0005737]	IPR016169;IPR016166;IPR016167;IPR003170;IPR011601;IPR006094	CO_DH_flavot_FAD-bd_sub2;FAD-bd_2;FAD-bd_2_sub1;MurB;MurB_C;Oxid_FAD_bind_N	ko00520;ko00550
*	RCAP_rcc00823	D5AQ01	D-alanine--D-alanine ligase (EC 6.3.2.4) (D-Ala-D-Ala ligase) (D-alanylalanine synthetase)	ddl	307	Cytoplasmic	TIGR01205;	89	Cell envelope	Biosynthesis and degradation of murein sacculus and peptidoglycan	cell wall organization [GO:0071555]; peptidoglycan biosynthetic process [GO:0009252]; regulation of cell shape [GO:0008360]	ATP binding [GO:0005524]; D-alanine-D-alanine ligase activity [GO:0008716]; metal ion binding [GO:0046872]	cytoplasm [GO:0005737]	IPR011761;IPR013815;IPR013816;IPR000291;IPR005905;IPR011095;IPR011127;IPR016185	ATP-grasp;ATP_grasp_subdomain_1;ATP_grasp_subdomain_2;D-Ala_lig_Van_CS;D_ala_D_ala;Dala_Dala_lig_C;Dala_Dala_lig_N;PreATP-grasp_dom	ko00473;ko00550
*	RCAP_rcc00824	D5AQ02	Cell division protein FtsQ	ftsQ	320	Unknown					cell septum assembly [GO:0090529]; FtsZ-dependent cytokinesis [GO:0043093]		cell division site [GO:0032153]; integral component of plasma membrane [GO:0005887]	IPR005548;IPR026579	Cell_div_FtsQ/DivIB;FtsQ	ko04112
*	RCAP_rcc00825	D5AQ03	Cell division protein FtsA	ftsA	442	Cytoplasmic	TIGR01174;	93	Cellular processes	Cell division	FtsZ-dependent cytokinesis [GO:0043093]		cell division site [GO:0032153]; cytoplasmic side of plasma membrane [GO:0009898]	IPR020823;IPR003494	Cell_div_FtsA;SHS2_FtsA	ko04112
*	RCAP_rcc00826	D5AQ04	Cell division protein FtsZ	ftsZ	575	Cytoplasmic	TIGR00065;	93	Cellular processes	Cell division	division septum assembly [GO:0000917]; FtsZ-dependent cytokinesis [GO:0043093]; protein polymerization [GO:0051258]	GTPase activity [GO:0003924]; GTP binding [GO:0005525]	cell division site [GO:0032153]; cytoplasm [GO:0005737]	IPR000158;IPR020805;IPR024757;IPR008280;IPR018316;IPR003008	Cell_div_FtsZ;Cell_div_FtsZ_CS;FtsZ_C;Tub_FtsZ_C;Tubulin/FtsZ_2-layer-sand-dom;Tubulin_FtsZ_GTPase	ko04112
	RCAP_rcc00827	D5AQ05	UDP-3-O-acyl-N-acetylglucosamine deacetylase (UDP-3-O-acyl-GlcNAc deacetylase) (EC 3.5.1.108) (UDP-3-O-[R-3-hydroxymyristoyl]-N-acetylglucosamine deacetylase)	lpxC	305	Cytoplasmic	TIGR00325;	90	Cell envelope	Biosynthesis and degradation of surface polysaccharides and lipopolysaccharides	lipid A biosynthetic process [GO:0009245]	metal ion binding [GO:0046872]; UDP-3-O-[3-hydroxymyristoyl] N-acetylglucosamine deacetylase activity [GO:0008759]; UDP-3-O-acyl-N-acetylglucosamine deacetylase activity [GO:0103117]		IPR020568;IPR004463;IPR011334;IPR015870	Ribosomal_S5_D2-typ_fold;UDP-acyl_GlcNac_deAcase;UDP-acyl_GlcNac_deAcase_C;UDP-acyl_N-AcGlcN_deAcase_N	ko00540
*	RCAP_rcc00828	D5AQ06	Outer membrane protein assembly factor BamD	comL	281	Outer Membrane	TIGR03302;	97	Protein fate	Protein and peptide secretion and trafficking	Gram-negative-bacterium-type cell outer membrane assembly [GO:0043165]; protein insertion into membrane [GO:0051205]		cell outer membrane [GO:0009279]	IPR017689;IPR011990	BamD;TPR-like_helical_dom
*	RCAP_rcc00829	D5AQ07	DNA repair protein RecN (Recombination protein N)	recN	549	Cytoplasmic	TIGR00634;	132	DNA metabolism	DNA replication, recombination, and repair	DNA recombination [GO:0006310]; DNA repair [GO:0006281]	ATP binding [GO:0005524]		IPR004604;IPR027417;IPR003395	DNA_recomb/repair_RecN;P-loop_NTPase;RecF/RecN/SMC_N
*	RCAP_rcc00830	D5AQ08	Uncharacterized protein	RCAP_rcc00830	130	Unknown
*	RCAP_rcc00831	D5AQ09	D-lactate dehydrogenase (Cytochrome) (EC 1.1.2.4)	dld	461	Cytoplasmic						D-lactate dehydrogenase (cytochrome) activity [GO:0004458]; FAD binding [GO:0071949]		IPR016169;IPR016166;IPR016167;IPR016164;IPR004113;IPR006094;IPR016171	CO_DH_flavot_FAD-bd_sub2;FAD-bd_2;FAD-bd_2_sub1;FAD-linked_Oxase-like_C;FAD-linked_oxidase_C;Oxid_FAD_bind_N;Vanillyl_alc_oxidase_C-sub2
*	RCAP_rcc00832	D5AQ10	Phosphate acetyltransferase (EC 2.3.1.8)	pta	461	Cytoplasmic						phosphate acetyltransferase activity [GO:0008959]		IPR029069;IPR002539;IPR002505	HotDog_dom;MaoC_dom;PTA_PTB	ko00430;ko00620;ko00640;ko00680;ko00720
*	RCAP_rcc00833	D5AQ11	Acetate kinase (EC 2.7.2.1) (Acetokinase)	ackA	389	Cytoplasmic	TIGR00016;	114	Energy metabolism	Fermentation	acetyl-CoA biosynthetic process [GO:0006085]; organic acid metabolic process [GO:0006082]	acetate kinase activity [GO:0008776]; ATP binding [GO:0005524]; magnesium ion binding [GO:0000287]	cytoplasm [GO:0005737]	IPR004372;IPR000890;IPR023865	Ac/Proprionate_kinase;Aliphatic_acid_kin_short-chain;Aliphatic_acid_kinase_CS
*	RCAP_rcc00834	D5AQ12	Aminopeptidase P (EC 3.4.11.9)	pepP	599	Cytoplasmic						metalloaminopeptidase activity [GO:0070006]		IPR029149;IPR028980;IPR000587;IPR000994	Creatin/AminoP/Spt16_NTD;Creatinase/Aminopeptidase_P_N;Creatinase_N;Pept_M24_structural-domain
*	RCAP_rcc00835	D5AQ13	Cobaltochelatase, CobT subunit (EC 6.6.1.2)	cobT	624	Cytoplasmic	TIGR01651;	79	Biosynthesis of cofactors, prosthetic groups, and carriers	Heme, porphyrin, and cobalamin	cobalamin biosynthetic process [GO:0009236]	cobaltochelatase activity [GO:0051116]		IPR006538;IPR025861;IPR002035	CobT;CobT_VWA_dom;VWF_A	ko00860
*	RCAP_rcc00836	D5AQ14	Cobaltochelatase, CobS subunit (EC 6.6.1.2)	cobS	324	Cytoplasmic	TIGR01650;	79	Biosynthesis of cofactors, prosthetic groups, and carriers	Heme, porphyrin, and cobalamin		ATPase activity [GO:0016887]; ATP binding [GO:0005524]; cobaltochelatase activity [GO:0051116]		IPR011704;IPR025865;IPR027417;IPR006537	ATPase_dyneun-rel_AAA;CobS_N_dom;P-loop_NTPase;PD_CobS	ko00860
*	RCAP_rcc00837	D5AQ15	Uncharacterized protein	RCAP_rcc00837	123	Unknown
*	RCAP_rcc00838	D5AQ16	DnaJ domain protein	RCAP_rcc00838	207	Cytoplasmic								IPR001623	DnaJ_domain
*	RCAP_rcc00839	D5AQ17	Malate synthase G (EC 2.3.3.9)	glcB	717	Cytoplasmic	TIGR01345;	120	Energy metabolism	TCA cycle	glyoxylate cycle [GO:0006097]; tricarboxylic acid cycle [GO:0006099]	malate synthase activity [GO:0004474]; metal ion binding [GO:0046872]	cytoplasm [GO:0005737]	IPR011076;IPR023310;IPR001465;IPR006253	Malate_synth-like;Malate_synth_G_beta_sub_dom;Malate_synthase;Malate_synthG	ko00620;ko00630
*	RCAP_rcc00840	D5AQ18	Aminopeptidase N (EC 3.4.11.2)	pepN	848	Unknown	TIGR02414;	138	Protein fate	Degradation of proteins, peptides, and glycopeptides		aminopeptidase activity [GO:0004177]; metallopeptidase activity [GO:0008237]; zinc ion binding [GO:0008270]		IPR001930;IPR014782;IPR012779;IPR024601	Peptidase_M1;Peptidase_M1_N;Peptidase_M1_pepN;Peptidase_M1_pepN_C	ko00480
*	RCAP_rcc00841	D5AQ19	Aspartyl/glutamyl-tRNA(Asn/Gln) amidotransferase subunit B (Asp/Glu-ADT subunit B) (EC 6.3.5.-)	gatB	505	Cytoplasmic	TIGR00133;	137	Protein synthesis	tRNA aminoacylation	translation [GO:0006412]	ATP binding [GO:0005524]; glutaminyl-tRNA synthase (glutamine-hydrolyzing) activity [GO:0050567]; transferase activity [GO:0016740]		IPR004413;IPR017959;IPR006075;IPR018027;IPR003789;IPR017958	Apn/Gln-ADT_bsu;Asn/Gln-tRNA_amidoTrfase_suB/E;Asn/Gln-tRNA_Trfase_suB/E_cat;Asn/Gln_amidotransferase;Asn/Gln_tRNA_amidoTrfrase-rel;Gln-tRNA_amidoTrfase_suB_CS	ko00970
*	RCAP_rcc00842	D5AQ20	Uncharacterized protein	RCAP_rcc00842	378	Cytoplasmic
*	RCAP_rcc00843	D5AQ21	Uncharacterized protein	RCAP_rcc00843	324	Cytoplasmic Membrane							integral component of membrane [GO:0016021]	IPR008526	YedI
	RCAP_rcc00844	D5AQ22	Uncharacterized protein	RCAP_rcc00844	184	Unknown
	RCAP_rcc00845	D5AQ23	Uncharacterized protein	RCAP_rcc00845	203	Cytoplasmic
*	RCAP_rcc00846	D5AQ24	Dipeptide ABC transporter, periplasmic dipeptide-binding protein DppA	dppA	532	Periplasmic					transmembrane transport [GO:0055085]		ATP-binding cassette (ABC) transporter complex [GO:0043190]	IPR030678;IPR000914	Peptide/Ni-bd;SBP_5_dom	ko02010
*	RCAP_rcc00847	D5AQ25	Dipeptide ABC transporter, permease protein DppB	dppB	354	Cytoplasmic Membrane					transmembrane transport [GO:0055085]		integral component of membrane [GO:0016021]; plasma membrane [GO:0005886]	IPR000515	MetI-like	ko02010
*	RCAP_rcc00848	D5AQ26	Dipeptide ABC transporter, permease protein DppC	dppC	301	Cytoplasmic Membrane					transmembrane transport [GO:0055085]		integral component of membrane [GO:0016021]; plasma membrane [GO:0005886]	IPR000515;IPR025966	MetI-like;OppC_N	ko02010
*	RCAP_rcc00849	D5AQ27	Dipeptide ABC transporter, ATP-binding protein DppD (EC 3.6.3.-)	dppD	277	Cytoplasmic Membrane						ATPase activity [GO:0016887]; ATP binding [GO:0005524]		IPR003593;IPR003439;IPR013563;IPR027417	AAA+_ATPase;ABC_transporter-like;Oligopep_ABC_C;P-loop_NTPase	ko02010
*	RCAP_rcc00850	D5AQ28	Dipeptide ABC transporter, ATP-binding protein DppF (EC 3.6.3.-)	dppF	259	Cytoplasmic Membrane						ATPase activity [GO:0016887]; ATP binding [GO:0005524]		IPR003593;IPR003439;IPR017871;IPR027417	AAA+_ATPase;ABC_transporter-like;ABC_transporter_CS;P-loop_NTPase	ko02010
*	RCAP_rcc00851	D5AQ29	Membrane dipeptidase (EC 3.4.13.19)	RCAP_rcc00851	352	Cytoplasmic						dipeptidase activity [GO:0016805]		IPR008257	Renal_dipep_fam
*	RCAP_rcc00852	D5AQ30	ATP-dependent RNA helicase SrmB (EC 3.6.1.-)	srmB	548	Cytoplasmic						ATP binding [GO:0005524]; helicase activity [GO:0004386]; nucleic acid binding [GO:0003676]		IPR011545;IPR014001;IPR001650;IPR027417;IPR000629;IPR014014	DEAD/DEAH_box_helicase_dom;Helicase_ATP-bd;Helicase_C;P-loop_NTPase;RNA-helicase_DEAD-box_CS;RNA_helicase_DEAD_Q_motif
*	RCAP_rcc00853	D5AQ31	Uncharacterized protein	RCAP_rcc00853	269	Cytoplasmic
*	RCAP_rcc00854	D5AQ32	Arginine--tRNA ligase (EC 6.1.1.19) (Arginyl-tRNA synthetase) (ArgRS)	argS	581	Cytoplasmic	TIGR00456;	137	Protein synthesis	tRNA aminoacylation	arginyl-tRNA aminoacylation [GO:0006420]	arginine-tRNA ligase activity [GO:0004814]; ATP binding [GO:0005524]	cytoplasm [GO:0005737]	IPR001412;IPR001278;IPR005148;IPR008909;IPR014729;IPR009080	aa-tRNA-synth_I_CS;Arg-tRNA-ligase;Arg-tRNA-synth_N;DALR_anticod-bd;Rossmann-like_a/b/a_fold;tRNAsynth_1a_anticodon-bd	ko00970
*	RCAP_rcc00855	D5AQ33	Sporulation domain protein	RCAP_rcc00855	343	Cytoplasmic						peptidoglycan binding [GO:0042834]	integral component of membrane [GO:0016021]	IPR007730	Sporulation-related_dom
*	RCAP_rcc00856	D5AQ34	Beta-N-acetylhexosaminidase (EC 3.2.1.52)	nagZ	340	Cytoplasmic					carbohydrate metabolic process [GO:0005975]	beta-N-acetylhexosaminidase activity [GO:0004563]; N-acetyl-beta-D-galactosaminidase activity [GO:0102148]		IPR019800;IPR001764;IPR017853	Glyco_hydro_3_AS;Glyco_hydro_3_N;Glycoside_hydrolase_SF	ko00520
	RCAP_rcc00857	D5AQ35	Segregation and condensation protein A	scpA	267	Cytoplasmic					cell cycle [GO:0007049]; cell division [GO:0051301]; chromosome segregation [GO:0007059]		cytoplasm [GO:0005737]	IPR023093;IPR003768	Rad21/Rec8_C;ScpA
*	RCAP_rcc00858	D5AQ36	Segregation and condensation protein B	scpB	213	Cytoplasmic	TIGR00281;	93	Cellular processes	Cell division	cell division [GO:0051301]; chromosome separation [GO:0051304]		cytoplasm [GO:0005737]	IPR005234;IPR011991	ScpB_csome_segregation;WHTH_DNA-bd_dom
	RCAP_rcc00859	D5AQ37	Uncharacterized protein	RCAP_rcc00859	69	Unknown
*	RCAP_rcc00860	D5AQ38	Enoyl-CoA hydratase/isomerase family protein	RCAP_rcc00860	261	Unknown						isomerase activity [GO:0016853]		IPR029045;IPR014748;IPR001753	ClpP/crotonase-like_dom;Crontonase_C;Crotonase_core_superfam	ko00071;ko00280;ko00281;ko00310;ko00362;ko00380;ko00410;ko00627;ko00640;ko00650;ko00903;ko00930
*	RCAP_rcc00861	D5AQ39	Thioesterase family protein	RCAP_rcc00861	138	Cytoplasmic								IPR029069;IPR006683	HotDog_dom;Thioestr_supf
	RCAP_rcc00862	D5AQ40	Divalent anion:Na+ symporter	RCAP_rcc00862	495	Cytoplasmic Membrane	TIGR00785;	143	Transport and binding proteins	Anions	sodium ion transport [GO:0006814]; transmembrane transport [GO:0055085]	transporter activity [GO:0005215]	integral component of membrane [GO:0016021]	IPR001898	Na/sul_symport
*	RCAP_rcc00863	D5AQ41	50S ribosomal protein L13	rplM	154	Cytoplasmic	TIGR01066;	158	Protein synthesis	Ribosomal proteins: synthesis and modification	translation [GO:0006412]	structural constituent of ribosome [GO:0003735]	ribosome [GO:0005840]	IPR005822;IPR005823;IPR023564	Ribosomal_L13;Ribosomal_L13_bac-type;Ribosomal_L13_dom	ko03010
*	RCAP_rcc00864	D5AQ42	30S ribosomal protein S9	rpsI	162	Cytoplasmic					translation [GO:0006412]	structural constituent of ribosome [GO:0003735]	ribosome [GO:0005840]	IPR020568;IPR014721;IPR000754;IPR023035;IPR020574	Ribosomal_S5_D2-typ_fold;Ribosomal_S5_D2-typ_fold_subgr;Ribosomal_S9;Ribosomal_S9_bac/plastid;Ribosomal_S9_CS	ko03010
	RCAP_rcc00865	D5AQ43	Hemolysin-type calcium-binding repeat family protein	RCAP_rcc00865	358	Extracellular						calcium ion binding [GO:0005509]		IPR018511;IPR001343;IPR011049	Hemolysin-typ_Ca-bd_CS;Hemolysn_Ca-bd;Serralysin-like_metalloprot_C
	RCAP_rcc00866	D5AQ44	Arginine exporter protein ArgO	argO	209	Cytoplasmic Membrane					amino acid transport [GO:0006865]		integral component of membrane [GO:0016021]; plasma membrane [GO:0005886]	IPR001123	LysE-type
	RCAP_rcc00867	D5AQ45	Transcriptional regulator, LysR family	RCAP_rcc00867	309	Cytoplasmic	TIGR03298;	94	Cellular processes	Toxin production and resistance		DNA binding [GO:0003677]; DNA-binding transcription factor activity [GO:0003700]		IPR005119;IPR017685;IPR000847;IPR011991	LysR_subst-bd;Tscrpt_reg_ArgP;Tscrpt_reg_HTH_LysR;WHTH_DNA-bd_dom
	RCAP_rcc00868	D5AQ46	Uncharacterized protein	RCAP_rcc00868	88	Cytoplasmic					regulation of transcription, DNA-templated [GO:0006355]	DNA binding [GO:0003677]; metal ion binding [GO:0046872]		IPR003735	Metal_Tscrpt_repr
*	RCAP_rcc00869	D5AQ47	S-(hydroxymethyl)glutathione dehydrogenase (EC 1.1.1.284)	adhC	369	Cytoplasmic	TIGR02818;	96	Cellular processes	Detoxification	ethanol oxidation [GO:0006069]	S-(hydroxymethyl)glutathione dehydrogenase activity [GO:0051903]; zinc ion binding [GO:0008270]		IPR014183;IPR013149;IPR013154;IPR002085;IPR002328;IPR011032;IPR016040	ADH_3;ADH_C;ADH_GroES-like;ADH_SF_Zn-type;ADH_Zn_CS;GroES-like;NAD(P)-bd_dom	ko00010;ko00071;ko00350;ko00625;ko00626;ko00680;ko00830;ko00980;ko00982
*	RCAP_rcc00870	D5AQ48	S-formylglutathione hydrolase (EC 3.1.2.12)	fghA	276	Unknown	TIGR02821;	96	Cellular processes	Detoxification	formaldehyde catabolic process [GO:0046294]	carboxylic ester hydrolase activity [GO:0052689]; S-formylglutathione hydrolase activity [GO:0018738]		IPR029058;IPR000801;IPR014186	AB_hydrolase;Esterase_put;S-formylglutathione_hydrol	ko00680
*	RCAP_rcc00871	D5AQ49	Uncharacterized protein	RCAP_rcc00871	238	Cytoplasmic Membrane							integral component of membrane [GO:0016021]	IPR006214	Bax_inhibitor_1-related
*	RCAP_rcc00872	D5AQ50	Alcohol dehydrogenase, zinc-binding domain protein (EC 1.1.1.-)	RCAP_rcc00872	319	Cytoplasmic						oxidoreductase activity [GO:0016491]		IPR013149;IPR013154;IPR002085;IPR011032;IPR016040	ADH_C;ADH_GroES-like;ADH_SF_Zn-type;GroES-like;NAD(P)-bd_dom
*	RCAP_rcc00873	D5AQ51	Transcriptional regulator, XRE family	RCAP_rcc00873	120	Unknown						sequence-specific DNA binding [GO:0043565]		IPR001387;IPR010982	Cro/C1-type_HTH;Lambda_DNA-bd_dom
*	RCAP_rcc00874	D5AQ52	Inositol monophosphatase family protein (EC 3.1.3.-)	RCAP_rcc00874	273	Cytoplasmic					phosphatidylinositol phosphorylation [GO:0046854]	hydrolase activity [GO:0016787]		IPR020583;IPR000760	Inositol_monoP_metal-BS;Inositol_monophosphatase
*	RCAP_rcc00875	D5AQ53	Hydroxydechloroatrazine ethylaminohydrolase (EC 3.5.99.3)	atzB	445	Cytoplasmic						hydroxydechloroatrazine ethylaminohydrolase activity [GO:0018763]		IPR006680;IPR011059	Amidohydro_1;Metal-dep_hydrolase_composite	ko00791
*	RCAP_rcc00876	D5AQ54	Guanine deaminase (EC 3.5.4.3)	guaD	427	Cytoplasmic	TIGR02967;	122	Purines, pyrimidines, nucleosides, and nucleotides	Other	guanine catabolic process [GO:0006147]	guanine deaminase activity [GO:0008892]; zinc ion binding [GO:0008270]		IPR006680;IPR014311;IPR011059	Amidohydro_1;Guanine_deaminase;Metal-dep_hydrolase_composite	ko00230
*	RCAP_rcc00877	D5AQ55	Magnesium transporter MgtE	mgtE	460	Cytoplasmic Membrane	TIGR00400;	145	Transport and binding proteins	Cations and iron carrying compounds		magnesium ion transmembrane transporter activity [GO:0015095]; metal ion binding [GO:0046872]	integral component of membrane [GO:0016021]; plasma membrane [GO:0005886]	IPR000644;IPR003018;IPR006668;IPR006669;IPR006667	CBS_dom;GAF;Mg_transptr_MgtE_intracell_dom;MgtE_transporter;SLC41_membr_dom
*	RCAP_rcc00878	D5AQ56	5-formyltetrahydrofolate cyclo-ligase (EC 6.3.3.2)	RCAP_rcc00878	191	Unknown	TIGR02727;	698	Central intermediary metabolism	One-carbon metabolism		5-formyltetrahydrofolate cyclo-ligase activity [GO:0030272]; ATP binding [GO:0005524]; metal ion binding [GO:0046872]		IPR002698;IPR024185	FTHF_cligase;FTHF_cligase-like	ko00670
*	RCAP_rcc00879	D5AQ57	Protein PhnA	phnA	114	Unknown	TIGR00686;	157	Unknown function	General				IPR004624;IPR013988;IPR013987	PhnA;PhnA_C;PhnA_N	ko00440
*	RCAP_rcc00880	D5AQ58	CHAP domain protein	RCAP_rcc00880	194	Unknown								IPR007921	CHAP_dom
*	RCAP_rcc00881	D5AQ59	Metallophosphoesterase family protein	RCAP_rcc00881	271	Cytoplasmic						metal ion binding [GO:0046872]		IPR005235;IPR029052	CHP00282;Metallo-depent_PP-like
*	RCAP_rcc00882	D5AQ60	Divalent ion symporter	RCAP_rcc00882	595	Cytoplasmic Membrane					potassium ion transport [GO:0006813]; sodium ion transport [GO:0006814]	cation transmembrane transporter activity [GO:0008324]	integral component of membrane [GO:0016021]	IPR004680;IPR006037	Cit_transptr-like_dom;RCK_C
*	RCAP_rcc00883	D5AQ61	Lipoprotein, putative	RCAP_rcc00883	127	Unknown
*	RCAP_rcc00884	D5AQ62	Probable transcriptional regulatory protein RCAP_rcc00884	RCAP_rcc00884	246	Cytoplasmic	TIGR01033;	261	Regulatory functions	DNA interactions	regulation of transcription, DNA-templated [GO:0006355]	DNA binding [GO:0003677]	cytoplasm [GO:0005737]	IPR017856;IPR002876;IPR026563;IPR026564;IPR029072	Integrase_Zn-bd_dom-like_N;Transcrip_reg_TACO1-like;Transcrip_reg_TACO1-like_dom2;Transcrip_reg_TACO1-like_dom3;YebC-like
	RCAP_rcc00885	D5AQ63	Membrane protein, putative	RCAP_rcc00885	332	Cytoplasmic Membrane							integral component of membrane [GO:0016021]
*	RCAP_rcc00886	D5AQ64	ABC transporter, ATP-binding protein (EC 3.6.3.-)	RCAP_rcc00886	225	Cytoplasmic Membrane						ATPase activity [GO:0016887]; ATP binding [GO:0005524]		IPR003593;IPR003439;IPR027417	AAA+_ATPase;ABC_transporter-like;P-loop_NTPase
*	RCAP_rcc00887	D5AQ65	Uncharacterized protein	RCAP_rcc00887	379	Cytoplasmic Membrane							integral component of membrane [GO:0016021]	IPR003838	ABC_permease_dom
	RCAP_rcc00888	D5AQ66	Uncharacterized protein	RCAP_rcc00888	109	Cytoplasmic Membrane
*	RCAP_rcc00889	D5AQ67	NosL family protein	RCAP_rcc00889	173	Unknown								IPR008719;IPR006311	N2O_reductase_NosL;TAT_signal
*	RCAP_rcc00890	D5AQ68	Uncharacterized protein	RCAP_rcc00890	215	Periplasmic								IPR008719;IPR006311	N2O_reductase_NosL;TAT_signal
	RCAP_rcc00891	D5AQ69	Uncharacterized protein	RCAP_rcc00891	143	Cytoplasmic Membrane
	RCAP_rcc00892	D5AQ70	Uncharacterized protein	RCAP_rcc00892	295	Cytoplasmic Membrane							integral component of membrane [GO:0016021]	IPR000620	EamA_dom
*	RCAP_rcc00893	D5AQ71	Glycine betaine/L-proline ABC transporter, ATP-binding protein ProV-1 (EC 3.6.3.32)	proV1	353	Cytoplasmic Membrane	TIGR03415;	142	Transport and binding proteins	Amino acids, peptides and amines		ATP binding [GO:0005524]; choline transmembrane transporter activity [GO:0015220]; quarternary amine transporter activity [GO:0102908]; quaternary-ammonium-compound-transporting ATPase activity [GO:0015418]	ATP-binding cassette (ABC) transporter complex, substrate-binding subunit-containing [GO:0055052]	IPR003593;IPR003439;IPR017871;IPR022473;IPR027417	AAA+_ATPase;ABC_transporter-like;ABC_transporter_CS;ABC_trnsptr_Choline_ATP-bd;P-loop_NTPase	ko02010
*	RCAP_rcc00894	D5AQ72	Glycine betaine/L-proline ABC transporter, permease protein ProW-1	proW1	338	Cytoplasmic Membrane	TIGR03416;	142	Transport and binding proteins	Amino acids, peptides and amines	transmembrane transport [GO:0055085]		integral component of membrane [GO:0016021]; plasma membrane [GO:0005886]	IPR017784;IPR000515	ABC_transptr_choline_permease;MetI-like	ko02010
*	RCAP_rcc00895	D5AQ73	Glycine betaine/L-proline ABC transporter, periplasmic glycine betaine/L-proline-binding protein ProX-1	proX1	308	Unknown	TIGR03414;	142	Transport and binding proteins	Amino acids, peptides and amines	choline transport [GO:0015871]	choline binding [GO:0033265]; transmembrane transporter activity [GO:0022857]	ATP-binding cassette (ABC) transporter complex [GO:0043190]; periplasmic space [GO:0042597]	IPR007210;IPR017783	ABC_Gly_betaine_transp_sub-bd;ABC_transptr_choline_sub-bd	ko02010
*	RCAP_rcc00896	D5AQ74	HTH-type transcriptional regulator BetI	betI	194	Unknown	TIGR03384;	261	Regulatory functions	DNA interactions	glycine betaine biosynthetic process from choline [GO:0019285]; negative regulation of transcription, DNA-templated [GO:0045892]	DNA binding [GO:0003677]; DNA-binding transcription factor activity [GO:0003700]		IPR009057;IPR001647;IPR015893;IPR011075;IPR017757	Homeodomain-like;HTH_TetR;Tet_transcr_reg_TetR-like_C;Tet_transcr_reg_TetR-rel_C;Tscrpt_rep_BetI
*	RCAP_rcc00897	D5AQ75	NAD/NADP-dependent betaine aldehyde dehydrogenase (BADH) (EC 1.2.1.8)	betB	483	Cytoplasmic	TIGR01804;	149	Cellular processes	Adaptations to atypical conditions	glycine betaine biosynthetic process from choline [GO:0019285]	betaine-aldehyde dehydrogenase activity [GO:0008802]; metal ion binding [GO:0046872]		IPR016161;IPR016163;IPR016160;IPR029510;IPR016162;IPR015590;IPR011264	Ald_DH/histidinol_DH;Ald_DH_C;Ald_DH_CS_CYS;Ald_DH_CS_GLU;Ald_DH_N;Aldehyde_DH_dom;BADH	ko00260
*	RCAP_rcc00898	D5AQ76	Choline dehydrogenase (EC 1.1.99.1)	betA	551	Cytoplasmic Membrane	TIGR01810;	149	Cellular processes	Adaptations to atypical conditions	glycine betaine biosynthetic process from choline [GO:0019285]	betaine-aldehyde dehydrogenase activity [GO:0008802]; choline dehydrogenase activity [GO:0008812]; flavin adenine dinucleotide binding [GO:0050660]		IPR011533;IPR012132;IPR000172;IPR007867	BetA;GMC_OxRdtase;GMC_OxRdtase_N;GMC_OxRtase_C
	RCAP_rcc00899	D5AQ77	Nuclease family protein	RCAP_rcc00899	211	Unknown								IPR016071	Staphylococal_nuclease_OB-fold
*	RCAP_rcc00900	D5AQ78	Uncharacterized protein	RCAP_rcc00900	184	Cytoplasmic							integral component of membrane [GO:0016021]	IPR010406	DUF1003
*	RCAP_rcc00901	D5AQ79	Uncharacterized protein	RCAP_rcc00901	79	Cytoplasmic								IPR007420	DUF465
*	RCAP_rcc00902	D5AQ80	Transcriptional regulator, XRE family	RCAP_rcc00902	465	Cytoplasmic					regulation of transcription, DNA-templated [GO:0006355]	sequence-specific DNA binding [GO:0043565]		IPR001387;IPR018653;IPR010359;IPR026281;IPR010982	Cro/C1-type_HTH;DUF2083_trans_reg;DUF955;HTH_tscrpt_reg_Rv0465c/Mt0481;Lambda_DNA-bd_dom
*	RCAP_rcc00903	D5AQ81	Uncharacterized protein	RCAP_rcc00903	186	Unknown
	RCAP_rcc00904	D5AQ82	Major facilitator superfamily MFS_1	RCAP_rcc00904	394	Cytoplasmic Membrane					transmembrane transport [GO:0055085]	transporter activity [GO:0005215]	integral component of membrane [GO:0016021]	IPR011701;IPR020846;IPR001958	MFS;MFS_dom;Tet-R_TetA/multi-R_MdtG
	RCAP_rcc00905	D5AQ83	Uncharacterized protein	RCAP_rcc00905	116	Cytoplasmic Membrane							integral component of membrane [GO:0016021]	IPR007437	DUF486
*	RCAP_rcc00906	D5AQ84	Propionyl-CoA carboxylase, beta subunit (EC 6.4.1.3)	pccB	510	Cytoplasmic					fatty acid biosynthetic process [GO:0006633]	acetyl-CoA carboxylase activity [GO:0003989]; propionyl-CoA carboxylase activity [GO:0004658]	acetyl-CoA carboxylase complex [GO:0009317]	IPR000438;IPR000022;IPR029045;IPR011763;IPR011762	Acetyl_CoA_COase_Trfase_b_su;Carboxyl_trans;ClpP/crotonase-like_dom;COA_CT_C;COA_CT_N	ko00280;ko00630;ko00640;ko00720
*	RCAP_rcc00907	D5AQ85	Uncharacterized protein	RCAP_rcc00907	179	Unknown
*	RCAP_rcc00908	D5AQ86	Lipoprotein, putative	RCAP_rcc00908	39	Unknown
*	RCAP_rcc00909	D5AQ87	Uncharacterized protein	RCAP_rcc00909	132	Unknown
*	RCAP_rcc00910	D5AQ88	Uncharacterized protein	RCAP_rcc00910	69	Cytoplasmic Membrane
*	RCAP_rcc00911	D5AQ89	Propionyl-CoA carboxylase, alpha subunit (EC 6.4.1.3)	pccA	661	Cytoplasmic						ATP binding [GO:0005524]; metal ion binding [GO:0046872]; propionyl-CoA carboxylase activity [GO:0004658]		IPR011761;IPR013815;IPR013816;IPR001882;IPR011764;IPR005482;IPR000089;IPR005481;IPR005479;IPR016185;IPR011054;IPR011053	ATP-grasp;ATP_grasp_subdomain_1;ATP_grasp_subdomain_2;Biotin_BS;Biotin_carboxylation_dom;Biotin_COase_C;Biotin_lipoyl;CarbamoylP_synth_lsu_N;CbamoylP_synth_lsu-like_ATP-bd;PreATP-grasp_dom;Rudment_hybrid_motif;Single_hybrid_motif	ko00280;ko00630;ko00640;ko00720
*	RCAP_rcc00912	D5AQ90	Methylmalonyl-CoA mutase (EC 5.4.99.2)	bhbA	709	Cytoplasmic	TIGR00640;TIGR00641;	125	Purines, pyrimidines, nucleosides, and nucleotides	Purine ribonucleotide biosynthesis		cobalamin binding [GO:0031419]; metal ion binding [GO:0046872]; methylmalonyl-CoA mutase activity [GO:0004494]		IPR006159;IPR016176;IPR014348;IPR006158;IPR006099;IPR006098	Acid_CoA_mut_C;Cbl-dep_enz_cat;Cbl-dep_enz_cat-sub;Cobalamin-bd;MeMalonylCoA_mutase_a/b_cat;MMCoA_mutase_a_cat	ko00280;ko00630;ko00640;ko00720
*	RCAP_rcc00913	D5AQ91	Bacterioferritin (EC 1.16.3.1)	bfr	161	Cytoplasmic	TIGR00754;	145	Transport and binding proteins	Cations and iron carrying compounds	cellular iron ion homeostasis [GO:0006879]; iron ion transport [GO:0006826]	ferric iron binding [GO:0008199]; ferroxidase activity [GO:0004322]	cell [GO:0005623]	IPR002024;IPR009040;IPR009078;IPR012347;IPR008331	Bacterioferritin;Ferritin-like_diiron;Ferritin-like_SF;Ferritin-rel;Ferritin_DPS_dom
	RCAP_rcc00914	D5AQ92	Uncharacterized protein	RCAP_rcc00914	80	Unknown								IPR007419	BFD-like_2Fe2S-bd_dom
*	RCAP_rcc00915	D5AQ93	Phosphatidylserine decarboxylase proenzyme (EC 4.1.1.65) [Cleaved into: Phosphatidylserine decarboxylase alpha chain; Phosphatidylserine decarboxylase beta chain]	psd	232	Cytoplasmic Membrane	TIGR00164;	157	Unknown function	General	phosphatidylethanolamine biosynthetic process [GO:0006646]	phosphatidylserine decarboxylase activity [GO:0004609]	integral component of membrane [GO:0016021]; plasma membrane [GO:0005886]	IPR003817	PS_Dcarbxylase	ko00564
	RCAP_rcc00916	D5AQ94	CDP-diacylglycerol--serine O-phosphatidyltransferase (EC 2.7.8.8)	pssA	245	Cytoplasmic Membrane	TIGR00473;	176	Fatty acid and phospholipid metabolism	Biosynthesis	phospholipid biosynthetic process [GO:0008654]	CDP-diacylglycerol-serine O-phosphatidyltransferase activity [GO:0003882]	integral component of membrane [GO:0016021]	IPR004533;IPR000462	CDP-diaglyc--ser_O-PTrfase;CDP-OH_P_trans	ko00260;ko00564
	RCAP_rcc00917	D5AQ95	Membrane protein, putative	RCAP_rcc00917	79	Cytoplasmic Membrane							integral component of membrane [GO:0016021]
	RCAP_rcc00918	D5AQ96	N-acetylmuramoyl-L-alanine amidase (EC 3.5.1.28)	RCAP_rcc00918	212	Cytoplasmic					peptidoglycan catabolic process [GO:0009253]	N-acetylmuramoyl-L-alanine amidase activity [GO:0008745]; zinc ion binding [GO:0008270]		IPR002502;IPR002477	Amidase_domain;Peptidoglycan-bd-like
	RCAP_rcc00919	D5AQ97	Uncharacterized protein	RCAP_rcc00919	627	Cytoplasmic Membrane							integral component of membrane [GO:0016021]	IPR021251	DUF2793
	RCAP_rcc00920	D5AQ98	Uncharacterized protein	RCAP_rcc00920	1323	Cytoplasmic Membrane								IPR025195	GTA_TIM_dom
	RCAP_rcc00921	D5AQ99	Phage cell wall peptidase, NlpC/P60 family	RCAP_rcc00921	151	Cytoplasmic Membrane	TIGR02219;	152	Mobile and extrachromosomal element functions	Prophage functions				IPR000064;IPR011929	NLP_P60_dom;Phage_pept_NlpC/P60
	RCAP_rcc00922	D5AQA0	Uncharacterized protein	RCAP_rcc00922	301	Unknown	TIGR02218;	152	Mobile and extrachromosomal element functions	Prophage functions				IPR011928;IPR018964;IPR019228	Phage_phiJL001_Gp84;Phage_phiJL001_Gp84_C;Phage_phiJL001_Gp84_N
	RCAP_rcc00923	D5AQA1	Uncharacterized protein	RCAP_rcc00923	99	Unknown							integral component of membrane [GO:0016021]
	RCAP_rcc00924	D5AQA2	Uncharacterized protein	RCAP_rcc00924	208	Unknown	TIGR02217;	152	Mobile and extrachromosomal element functions	Prophage functions				IPR011740	DUF2460
	RCAP_rcc00925	D5AQA3	Uncharacterized protein	RCAP_rcc00925	698	Unknown								IPR006431;IPR009628	Phage_lambda_GpH_tape_meas_C;Phage_lambda_GpH_tape_meas_N
	RCAP_rcc00926	D5AQA4	Uncharacterized protein	RCAP_rcc00926	67	Unknown
	RCAP_rcc00927	D5AQA5	Uncharacterized protein	RCAP_rcc00927	135	Unknown
	RCAP_rcc00928	D5AQA6	Uncharacterized protein	RCAP_rcc00928	314	Unknown
	RCAP_rcc00929	D5AQA7	Uncharacterized protein	RCAP_rcc00929	146	Unknown
*	RCAP_rcc00930	D5AQA8	Conserved domain protein	RCAP_rcc00930	398	Cytoplasmic
	RCAP_rcc00931	D5AQA9	Uncharacterized protein	RCAP_rcc00931	213	Cytoplasmic Membrane
	RCAP_rcc00932	D5AQB0	Uncharacterized protein	RCAP_rcc00932	104	Unknown
	RCAP_rcc00933	D5AQB1	Uncharacterized protein	RCAP_rcc00933	112	Unknown								IPR011231	Phage_VT1-Sakai_H0018
	RCAP_rcc00934	D5AQB2	Peptidase, U35 family, phage prohead HK97 (EC 3.4.-.-)	RCAP_rcc00934	672	Unknown						hydrolase activity [GO:0016787]		IPR006433	Prohead_protease_HK97
*	RCAP_rcc00935	D5AQB3	Uncharacterized protein	RCAP_rcc00935	185	Unknown
	RCAP_rcc00936	D5AQB4	Phage portal protein, lambda family	RCAP_rcc00936	507	Cytoplasmic	TIGR01539;	152	Mobile and extrachromosomal element functions	Prophage functions	virion assembly [GO:0019068]	structural molecule activity [GO:0005198]		IPR006429	Phage_lambda_GpB
	RCAP_rcc00937	D5AQB5	Uncharacterized protein	RCAP_rcc00937	69	Unknown
	RCAP_rcc00938	D5AQB6	Phage terminase, large subunit	RCAP_rcc00938	660	Cytoplasmic								IPR008866	Phage_lambda_GpA
	RCAP_rcc00939	D5AQB7	Uncharacterized protein	RCAP_rcc00939	202	Cytoplasmic
	RCAP_rcc00940	D5AQB8	Uncharacterized protein	RCAP_rcc00940	73	Unknown
	RCAP_rcc00941	D5AQB9	Conserved domain protein	RCAP_rcc00941	305	Unknown
	RCAP_rcc00942	D5AQC0	Uncharacterized protein	RCAP_rcc00942	234	Cytoplasmic								IPR001926	TrpB-like_PLP-dep
	RCAP_rcc00943	D5AQC1	Site-specific DNA-methyltransferase (Cytosine-N(4)-specific) (EC 2.1.1.113)	RCAP_rcc00943	324	Cytoplasmic						DNA binding [GO:0003677]; N-methyltransferase activity [GO:0008170]; site-specific DNA-methyltransferase (cytosine-N4-specific) activity [GO:0015667]		IPR001091;IPR029063	RM_Methylase;SAM-dependent_MTases
	RCAP_rcc00944	D5AQQ3	ParB domain protein nuclease	RCAP_rcc00944	258	Cytoplasmic								IPR003115	ParB/Sulfiredoxin_dom
	RCAP_rcc00945	D5AQQ4	Uncharacterized protein	RCAP_rcc00945	173	Unknown
	RCAP_rcc00946	D5AQQ5	Transcriptional regulator, MarR family	RCAP_rcc00946	321	Cytoplasmic								IPR011991	WHTH_DNA-bd_dom
	RCAP_rcc00947	D5AQQ6	Uncharacterized protein	RCAP_rcc00947	68	Unknown
	RCAP_rcc00948	D5AQQ7	Uncharacterized protein	RCAP_rcc00948	84	Unknown								IPR009061;IPR011991	DNA-bd_dom_put;WHTH_DNA-bd_dom
	RCAP_rcc00949	D5AQQ8	Uncharacterized protein	RCAP_rcc00949	196	Cytoplasmic
	RCAP_rcc00950	D5AQQ9	Phage integrase	RCAP_rcc00950	409	Cytoplasmic					DNA integration [GO:0015074]; DNA recombination [GO:0006310]	DNA binding [GO:0003677]		IPR011010;IPR025166;IPR013762;IPR002104;IPR023109;IPR004107	DNA_brk_join_enz;DUF4102;Integrase-like_cat-core;Integrase_catalytic;Integrase_recombinase_N;Integrase_SAM-like_N
*	RCAP_rcc00951	D5AQR0	Type I restriction-modification system RcaSBIP, R subunit (EC 3.1.21.3)	hsdR1	1135	Cytoplasmic					DNA modification [GO:0006304]	ATP binding [GO:0005524]; DNA binding [GO:0003677]; type I site-specific deoxyribonuclease activity [GO:0009035]		IPR025285;IPR013670;IPR006935;IPR014001;IPR001650;IPR027417;IPR007409	DUF4145;EcoEI_R_C_dom;Helicase/UvrB_dom;Helicase_ATP-bd;Helicase_C;P-loop_NTPase;Restrct_endonuc_type1_HsdR_N
*	RCAP_rcc00952	D5AQR1	Type I restriction-modification system RcaSBIP, M subunit (EC 2.1.1.72)	hsdM1	489	Cytoplasmic						DNA binding [GO:0003677]; N-methyltransferase activity [GO:0008170]; site-specific DNA-methyltransferase (adenine-specific) activity [GO:0009007]		IPR022749;IPR003356;IPR002052;IPR029063	D12N6_MeTrfase_N;DNA_methylase_A-5;DNA_methylase_N6_adenine_CS;SAM-dependent_MTases
	RCAP_rcc00953	D5AQR2	Uncharacterized protein	RCAP_rcc00953	308	Unknown								IPR025579	DUF4357
*	RCAP_rcc00954	D5AQR3	Type I restriction-modification system RcaSBIP, S subunit	hsdS1	541	Cytoplasmic					DNA modification [GO:0006304]	DNA binding [GO:0003677]		IPR000055	Restrct_endonuc_typeI_HsdS
*	RCAP_rcc00955	D5AQR4	SMC protein, N-terminal domain protein	RCAP_rcc00955	550	Cytoplasmic						ATP binding [GO:0005524]		IPR003959;IPR027417	ATPase_AAA_core;P-loop_NTPase
*	RCAP_rcc00956	D5AQR5	Uncharacterized protein	RCAP_rcc00956	284	Cytoplasmic
	RCAP_rcc00957	D5AQR6	Uncharacterized protein	RCAP_rcc00957	51	Unknown
	RCAP_rcc00960	D5AQR7	Transposase, IS111A/IS1328/IS1533 family/transposase, IS116/IS110/IS902 family	RCAP_rcc00960	394	Cytoplasmic					transposition, DNA-mediated [GO:0006313]	DNA binding [GO:0003677]; transposase activity [GO:0004803]		IPR003346;IPR002525	Transposase_20;Transposase_N
*	RCAP_rcc00961	D5AQR8	Uncharacterized protein	RCAP_rcc00961	326	Unknown
	RCAP_rcc00962	D5AQR9	Uncharacterized protein	RCAP_rcc00962	88	Unknown
*	RCAP_rcc00963	D5AQS0	Uncharacterized protein	RCAP_rcc00963	443	Cytoplasmic Membrane								IPR005181;IPR013830	DUF303_acetylest;SGNH_hydro
	RCAP_rcc00964	D5AQS1	Phage tail fiber protein	RCAP_rcc00964	1142	Unknown							integral component of membrane [GO:0016021]
	RCAP_rcc00965	D5AQS2	Phage tail assembly protein	RCAP_rcc00965	146	Cytoplasmic								IPR000064	NLP_P60_dom
	RCAP_rcc00966	D5AQS3	Uncharacterized protein	RCAP_rcc00966	175	Cytoplasmic
	RCAP_rcc00967	D5AQS4	Uncharacterized protein	RCAP_rcc00967	140	Unknown
*	RCAP_rcc00968	D5AQS5	Uncharacterized protein	RCAP_rcc00968	1027	Outer Membrane
	RCAP_rcc00969	D5AQS6	Uncharacterized protein	RCAP_rcc00969	71	Unknown								IPR014915	Phage_TLS_TfmB
	RCAP_rcc00970	D5AQS7	Uncharacterized protein	RCAP_rcc00970	125	Unknown
	RCAP_rcc00971	D5AQS8	Uncharacterized protein	RCAP_rcc00971	308	Unknown
	RCAP_rcc00972	D5AQS9	Uncharacterized protein	RCAP_rcc00972	65	Unknown
	RCAP_rcc00973	D5AQT0	Uncharacterized protein	RCAP_rcc00973	143	Unknown
	RCAP_rcc00974	D5AQT1	Uncharacterized protein	RCAP_rcc00974	141	Unknown								IPR009752	Phage_Mu_Gp36
	RCAP_rcc00975	D5AQT2	Cyclic nucleotide-binding domain protein	RCAP_rcc00975	96	Unknown								IPR000595	cNMP-bd_dom
	RCAP_rcc00976	D5AQT3	Uncharacterized protein	RCAP_rcc00976	162	Cytoplasmic
	RCAP_rcc00977	D5AQT4	Uncharacterized protein	RCAP_rcc00977	317	Cytoplasmic								IPR005564	Major_head_GpE
	RCAP_rcc00978	D5AQT5	Uncharacterized protein	RCAP_rcc00978	114	Unknown
	RCAP_rcc00979	D5AQT6	Uncharacterized protein	RCAP_rcc00979	370	Cytoplasmic
	RCAP_rcc00980	D5AQT7	Phage virion morphogenesis protein	RCAP_rcc00980	184	Unknown	TIGR01635;	152	Mobile and extrachromosomal element functions	Prophage functions				IPR006522	Phage_virion_morphogenesis
	RCAP_rcc00981	D5AQT8	Phage head morphogenesis protein, putative	RCAP_rcc00981	493	Cytoplasmic								IPR006528	Phage_head_morphogenesis
	RCAP_rcc00982	D5AQT9	Uncharacterized protein	RCAP_rcc00982	458	Unknown								IPR009279	DUF935
	RCAP_rcc00983	D5AQU0	Uncharacterized protein	RCAP_rcc00983	74	Unknown
	RCAP_rcc00984	D5AQU1	Uncharacterized protein	RCAP_rcc00984	96	Unknown
	RCAP_rcc00985	D5AQU2	Uncharacterized protein	RCAP_rcc00985	552	Cytoplasmic	TIGR01630;	152	Mobile and extrachromosomal element functions	Prophage functions				IPR006517	Arc_phage_psiM2_terminase_lsu
	RCAP_rcc00986	D5AQU3	Uncharacterized protein	RCAP_rcc00986	167	Cytoplasmic								IPR014926	Phage_D3112_Orf24
	RCAP_rcc00987	D5AQU4	Uncharacterized protein	RCAP_rcc00987	88	Unknown							integral component of membrane [GO:0016021]	IPR019715	Haemolysin_XhlA
	RCAP_rcc00988	D5AQU5	Uncharacterized protein	RCAP_rcc00988	170	Cytoplasmic Membrane							integral component of membrane [GO:0016021]
	RCAP_rcc00989	D5AQU6	Lysozyme (EC 3.2.1.17)	RCAP_rcc00989	309	Unknown					metabolic process [GO:0008152]	lysozyme activity [GO:0003796]	integral component of membrane [GO:0016021]	IPR023346;IPR023347;IPR002477	Lysozyme-like_dom;Lysozyme_dom;Peptidoglycan-bd-like
	RCAP_rcc00990	D5AQU7	Uncharacterized protein	RCAP_rcc00990	122	Unknown						DNA binding [GO:0003677]		IPR009057	Homeodomain-like
	RCAP_rcc00991	D5AQU8	Uncharacterized protein	RCAP_rcc00991	225	Unknown								IPR024498	DUF2786
	RCAP_rcc00992	D5AQU9	Uncharacterized protein	RCAP_rcc00992	35	Cytoplasmic Membrane							integral component of membrane [GO:0016021]
	RCAP_rcc00993	D5AQV0	Uncharacterized protein	RCAP_rcc00993	148	Cytoplasmic								IPR009363	Phage_Mu_Gp16
	RCAP_rcc00994	D5AQV1	Uncharacterized protein	RCAP_rcc00994	71	Unknown
	RCAP_rcc00995	D5AQV2	Conserved domain protein	RCAP_rcc00995	294	Cytoplasmic
*	RCAP_rcc00996	D5AQV3	DNA-binding protein HU-2	hup2	91	Cytoplasmic						DNA binding [GO:0003677]		IPR000119;IPR020816;IPR010992	Hist_DNA-bd_bac;Histone-like_DNA-bd_CS;IHF-like_DNA-bd_dom
	RCAP_rcc00997	D5AQV4	Uncharacterized protein	RCAP_rcc00997	68	Unknown
	RCAP_rcc00998	D5AQV5	Host-nuclease inhibitor protein Gam	gam	180	Cytoplasmic					DNA protection [GO:0042262]	double-stranded DNA binding [GO:0003690]		IPR009951	Host-nuc_inhib_Gam
	RCAP_rcc00999	D5AQV6	Uncharacterized protein	RCAP_rcc00999	121	Unknown
	RCAP_rcc01000	D5AQV7	Uncharacterized protein	RCAP_rcc01000	195	Cytoplasmic								IPR011991	WHTH_DNA-bd_dom
	RCAP_rcc01001	D5AQV8	Bacteriophage DNA transposition B protein	RCAP_rcc01001	257	Cytoplasmic								IPR027417	P-loop_NTPase
	RCAP_rcc01002	D5AQV9	Integrase, catalytic region	RCAP_rcc01002	766	Cytoplasmic					DNA integration [GO:0015074]	DNA binding [GO:0003677]		IPR009061;IPR001584;IPR003314;IPR012337;IPR015378;IPR009004;IPR011991	DNA-bd_dom_put;Integrase_cat-core;MuA/CI_DNA-bd;RNaseH-like_dom;Transposase-like_Mu_C;Transposase_Mu_C;WHTH_DNA-bd_dom
	RCAP_rcc01003	D5AQW0	Uncharacterized protein	RCAP_rcc01003	155	Cytoplasmic
	RCAP_rcc01004	D5AQW1	ParB domain protein nuclease	RCAP_rcc01004	283	Cytoplasmic								IPR003115	ParB/Sulfiredoxin_dom
	RCAP_rcc01005	D5AQW2	Uncharacterized protein	RCAP_rcc01005	63	Unknown
*	RCAP_rcc01006	D5AQW3	Uncharacterized protein	RCAP_rcc01006	96	Unknown
	RCAP_rcc01007	D5AQW4	Membrane protein, putative	RCAP_rcc01007	41	Cytoplasmic Membrane							integral component of membrane [GO:0016021]
	RCAP_rcc01008	D5AQW5	Lipoprotein, putative	RCAP_rcc01008	44	Cytoplasmic Membrane							integral component of membrane [GO:0016021]
	RCAP_rcc01009	D5AQW6	Uncharacterized protein	RCAP_rcc01009	105	Unknown
	RCAP_rcc01010	D5AQW7	DNA binding protein	RCAP_rcc01010	97	Unknown						DNA binding [GO:0003677]		IPR010982	Lambda_DNA-bd_dom
*	RCAP_rcc01011	D5AQW8	Peptidase, S24 family (EC 3.4.21.-)	RCAP_rcc01011	203	Cytoplasmic					DNA repair [GO:0006281]; SOS response [GO:0009432]	hydrolase activity [GO:0016787]		IPR010982;IPR028360;IPR019759;IPR015927	Lambda_DNA-bd_dom;Peptidase_S24/S26_b-rbn;Peptidase_S24_S26;Peptidase_S24_S26A/B/C
*	RCAP_rcc01012	D5AQW9	Conserved domain protein	RCAP_rcc01012	126	Unknown
	RCAP_rcc01013	D5AQX0	Uncharacterized protein	RCAP_rcc01013	158	Unknown
*	RCAP_rcc01014	D5AQX1	Conserved domain protein	RCAP_rcc01014	229	Unknown
*	RCAP_rcc01015	D5AQX2	Uncharacterized protein	RCAP_rcc01015	66	Unknown						DNA binding [GO:0003677]		IPR010982	Lambda_DNA-bd_dom
*	RCAP_rcc01019	D5AQX3	PHP domain protein	RCAP_rcc01019	317	Unknown						hydrolase activity [GO:0016787]		IPR004013;IPR003141;IPR016195	PHP_C;Pol/His_phosphatase_N;Pol/histidinol_Pase-like
	RCAP_rcc01020	D5AQX4	Diguanylate cyclase/phosphodiesterase family protein (EC 3.1.4.-)	RCAP_rcc01020	592	Cytoplasmic Membrane	TIGR00254;	264	Regulatory functions	Small molecule interactions		hydrolase activity [GO:0016787]		IPR000644;IPR001633;IPR000160;IPR029787	CBS_dom;EAL_dom;GGDEF_dom;Nucleotide_cyclase
	RCAP_rcc01021	D5AQX5	sn-glycerol-3-phosphate import ATP-binding protein UgpC (EC 3.6.3.20)	ugpC	365	Cytoplasmic Membrane					carbohydrate transport [GO:0008643]; glycerophosphodiester transmembrane transport [GO:0001407]	ATP binding [GO:0005524]; glycerol-3-phosphate-transporting ATPase activity [GO:0015430]	plasma membrane [GO:0005886]	IPR003593;IPR003439;IPR017871;IPR008995;IPR012340;IPR027417;IPR017922	AAA+_ATPase;ABC_transporter-like;ABC_transporter_CS;Mo/tungstate-bd_C_term_dom;NA-bd_OB-fold;P-loop_NTPase;UgpC	ko02010
	RCAP_rcc01022	D5AQX6	sn-glycerol-3-phosphate transport system permease protein UgpE	ugpE	280	Cytoplasmic Membrane					glycerol-3-phosphate transmembrane transport [GO:0015794]; glycerophosphodiester transmembrane transport [GO:0001407]		ATP-binding cassette (ABC) transporter complex, substrate-binding subunit-containing [GO:0055052]; integral component of plasma membrane [GO:0005887]	IPR000515;IPR030165	MetI-like;UgpE	ko02010
	RCAP_rcc01023	D5AQX7	sn-glycerol-3-phosphate transport system permease protein UgpA	ugpA	314	Cytoplasmic Membrane					transmembrane transport [GO:0055085]		integral component of membrane [GO:0016021]; plasma membrane [GO:0005886]	IPR000515	MetI-like	ko02010
	RCAP_rcc01024	D5AQX8	sn-glycerol-3-phosphate-binding periplasmic protein ugpB	ugpB	431	Periplasmic								IPR030166	UgpB	ko02010
	RCAP_rcc01025	D5AQX9	Photosynthetic apparatus regulatory protein RegA-2	regA2	189	Cytoplasmic					phosphorelay signal transduction system [GO:0000160]	phosphorelay response regulator activity [GO:0000156]; sequence-specific DNA binding [GO:0043565]		IPR011006;IPR009057;IPR002197;IPR001789	CheY-like_superfamily;Homeodomain-like;HTH_Fis;Sig_transdc_resp-reg_receiver
	RCAP_rcc01026	D5AQY0	Sensor histidine kinase (EC 2.7.13.3)	RCAP_rcc01026	422	Cytoplasmic Membrane						ATP binding [GO:0005524]; phosphorelay sensor kinase activity [GO:0000155]	integral component of membrane [GO:0016021]	IPR003661;IPR003594;IPR004358;IPR005467;IPR009082	EnvZ-like_dim/P;HATPase_C;Sig_transdc_His_kin-like_C;Sig_transdc_His_kinase_core;Sig_transdc_His_kinase_dimeric
	RCAP_rcc01027	D5AQY1	Uncharacterized protein	RCAP_rcc01027	146	Unknown							integral component of membrane [GO:0016021]
*	RCAP_rcc01028	D5AQY2	Iron siderophore/cobalamin ABC transporter, periplasmic iron siderophore/cobalamin-binding protein	RCAP_rcc01028	368	Unknown								IPR002491	ABC_transptr_periplasmic_BD
	RCAP_rcc01029	D5AQY3	Iron siderophore/cobalamin ABC transporter, permease protein	RCAP_rcc01029	209	Cytoplasmic Membrane						transporter activity [GO:0005215]	integral component of membrane [GO:0016021]; plasma membrane [GO:0005886]	IPR029022;IPR000522	ABC_BtuC-like;ABC_transptr_permAse
	RCAP_rcc01030	D5AQY4	Iron siderophore/cobalamin ABC transporter, permease protein	RCAP_rcc01030	130	Cytoplasmic Membrane						transporter activity [GO:0005215]	integral component of membrane [GO:0016021]; plasma membrane [GO:0005886]	IPR029022;IPR000522	ABC_BtuC-like;ABC_transptr_permAse
	RCAP_rcc01031	D5AQY5	Iron siderophore/cobalamin ABC transporter, ATP-binding protein (EC 3.6.3.-)	RCAP_rcc01031	248	Cytoplasmic Membrane						ATPase activity [GO:0016887]; ATP binding [GO:0005524]		IPR003593;IPR003439;IPR027417	AAA+_ATPase;ABC_transporter-like;P-loop_NTPase
*	RCAP_rcc01032	D5AQY6	Nickel import ATP-binding protein NikO (EC 3.6.3.-) (Energy-coupling factor transporter ATP-binding protein NikO) (ECF transporter A component NikO)	nikO	254	Cytoplasmic Membrane					nickel cation transport [GO:0015675]	ATPase activity [GO:0016887]; ATP binding [GO:0005524]	ATP-binding cassette (ABC) transporter complex [GO:0043190]	IPR003593;IPR003439;IPR017871;IPR027417	AAA+_ATPase;ABC_transporter-like;ABC_transporter_CS;P-loop_NTPase	ko02010
	RCAP_rcc01033	D5AQY7	Nickel transport protein NikQ (Energy-coupling factor transporter transmembrane protein NikQ) (ECF transporter T component NikQ)	nikQ	284	Cytoplasmic Membrane	TIGR02454;	145	Transport and binding proteins	Cations and iron carrying compounds	cobalt ion transport [GO:0006824]; nickel cation transport [GO:0015675]		ATP-binding cassette (ABC) transporter complex [GO:0043190]; integral component of plasma membrane [GO:0005887]	IPR003339;IPR012809	ABC/ECF_trnsptr_transmembrane;ECF_CbiQ	ko02010
*	RCAP_rcc01034	D5AQY8	Fused nickel transport protein NikMN (Energy-coupling factor transporter probable substrate-capture protein NikMN) (ECF transporter S component NikMN)	nikMN	347	Cytoplasmic Membrane					nickel cation transport [GO:0015675]		ATP-binding cassette (ABC) transporter complex [GO:0043190]	IPR002751;IPR025937	CbiM_fam;PDGLE_dom	ko02010
*	RCAP_rcc01035	D5AQY9	Conserved domain protein	RCAP_rcc01035	1174	Cytoplasmic Membrane							integral component of membrane [GO:0016021]
	RCAP_rcc01036	D5AQZ0	Uncharacterized protein	RCAP_rcc01036	308	Unknown								IPR008930	Terpenoid_cyclase/PrenylTrfase
	RCAP_rcc01037	D5AQZ1	Conserved domain protein	RCAP_rcc01037	339	Unknown
*	RCAP_rcc01038	D5AQZ2	Conserved domain protein	RCAP_rcc01038	775	Outer Membrane
*	RCAP_rcc01039	D5AQZ3	Uncharacterized protein	RCAP_rcc01039	164	Unknown
*	RCAP_rcc01040	D5AQZ4	Membrane protein, putative	RCAP_rcc01040	118	Cytoplasmic Membrane							integral component of membrane [GO:0016021]
*	RCAP_rcc01041	D5AQZ5	Uncharacterized protein	RCAP_rcc01041	85	Unknown
*	RCAP_rcc01042	D5AQZ6	Copper-transporting P-type ATPase-1 (EC 3.6.3.4)	copA1	713	Cytoplasmic Membrane	TIGR01525;TIGR01494;	145	Transport and binding proteins	Cations and iron carrying compounds		copper-exporting ATPase activity [GO:0004008]; nucleotide binding [GO:0000166]	integral component of membrane [GO:0016021]; plasma membrane [GO:0005886]	IPR023299;IPR018303;IPR008250;IPR023214;IPR027256;IPR001757	ATPase_P-typ_cyto_domN;ATPase_P-typ_P_site;ATPase_P-typ_transduc_dom_A;HAD-like_dom;P-typ_ATPase_IB;P_typ_ATPase
	RCAP_rcc01043	D5AQZ7	Uncharacterized protein	RCAP_rcc01043	128	Unknown
*	RCAP_rcc01044	D5AQZ8	RimK-like ATP-grasp domain protein	RCAP_rcc01044	285	Cytoplasmic Membrane						ATP binding [GO:0005524]; glutathione synthase activity [GO:0004363]		IPR013816;IPR004218	ATP_grasp_subdomain_2;GSHS_ATP-bd
*	RCAP_rcc01045	D5AQZ9	Iron siderophore/cobalamin ABC transporter, ATP-binding protein (EC 3.6.3.-)	RCAP_rcc01045	260	Cytoplasmic Membrane						ATPase activity [GO:0016887]; ATP binding [GO:0005524]		IPR003593;IPR003439;IPR017871;IPR027417	AAA+_ATPase;ABC_transporter-like;ABC_transporter_CS;P-loop_NTPase	ko02010
	RCAP_rcc01046	D5AR00	Iron siderophore/cobalamin ABC transporter, permease protein	RCAP_rcc01046	347	Cytoplasmic Membrane						transporter activity [GO:0005215]	integral component of membrane [GO:0016021]; plasma membrane [GO:0005886]	IPR029022;IPR000522	ABC_BtuC-like;ABC_transptr_permAse	ko02010
*	RCAP_rcc01047	D5AR01	Iron siderophore/cobalamin ABC transporter, periplasmic iron siderophore/cobalamin-binding protein	RCAP_rcc01047	372	Unknown								IPR002491	ABC_transptr_periplasmic_BD
	RCAP_rcc01048	D5AR02	Transcriptional regulator, AraC family	RCAP_rcc01048	290	Cytoplasmic						DNA-binding transcription factor activity [GO:0003700]; sequence-specific DNA binding [GO:0043565]		IPR009057;IPR018060	Homeodomain-like;HTH_AraC
	RCAP_rcc01049	D5AR03	TonB-dependent siderophore receptor	RCAP_rcc01049	708	Outer Membrane	TIGR01783;	145	Transport and binding proteins	Cations and iron carrying compounds	siderophore transport [GO:0015891]	iron ion binding [GO:0005506]; signaling receptor activity [GO:0038023]	cell outer membrane [GO:0009279]	IPR012910;IPR000531;IPR010917;IPR010105	Plug;TonB-dep_rcpt_b-brl;TonB_rcpt_CS;TonB_sidphr_rcpt
	RCAP_rcc01050	D5AR04	Enterochelin esterase	fes	521	Cytoplasmic Membrane					iron ion transport [GO:0006826]	enterochelin esterase activity [GO:0008849]; iron ion binding [GO:0005506]	cytoplasm [GO:0005737]	IPR029058;IPR021764;IPR000801;IPR013783;IPR014756	AB_hydrolase;Enterochelin_esterase_N;Esterase_put;Ig-like_fold;Ig_E-set
	RCAP_rcc01051	D5AR05	Gas vesicle protein GvpN	gvpN	305	Cytoplasmic						ATPase activity [GO:0016887]; ATP binding [GO:0005524]		IPR003593;IPR011704;IPR027417	AAA+_ATPase;ATPase_dyneun-rel_AAA;P-loop_NTPase
	RCAP_rcc01052	D5AR06	Uncharacterized protein	RCAP_rcc01052	78	Unknown
*	RCAP_rcc01053	D5AR07	Gas vesicle protein GvpO	gvpO	130	Unknown					gas vesicle organization [GO:0031412]			IPR008634	Gas-vesicle_GvpO
*	RCAP_rcc01054	D5AR08	Gas vesicle structural protein	gvpJ	151	Cytoplasmic						structural molecule activity [GO:0005198]	gas vesicle [GO:0031411]; vacuole [GO:0005773]; vesicle membrane [GO:0012506]	IPR000638;IPR018493	Gas-vesicle_GvpA;Gas-vesicle_GvpA_CS
*	RCAP_rcc01055	D5AR09	Uncharacterized protein	RCAP_rcc01055	144	Unknown
	RCAP_rcc01056	D5AR10	Gas vesicle synthesis protein GvpL/GvpF	RCAP_rcc01056	261	Unknown					gas vesicle organization [GO:0031412]		gas vesicle [GO:0031411]	IPR009430	Gas-vesicle_GvpL/GvpF
	RCAP_rcc01057	D5AR11	Gas vesicle protein GvpG	gvpG	85	Cytoplasmic								IPR007804	Gas-vesicle_GvpG
*	RCAP_rcc01058	D5AR12	Gas vesicle synthesis protein GvpL/GvpF	RCAP_rcc01058	316	Cytoplasmic					gas vesicle organization [GO:0031412]		gas vesicle [GO:0031411]	IPR009430	Gas-vesicle_GvpL/GvpF
	RCAP_rcc01059	D5AR13	Gas vesicle synthesis protein GvpL/GvpF	RCAP_rcc01059	231	Unknown					gas vesicle organization [GO:0031412]		gas vesicle [GO:0031411]	IPR009430	Gas-vesicle_GvpL/GvpF
	RCAP_rcc01060	D5AR14	Gas vesicle protein GvpA	RCAP_rcc01060	69	Cytoplasmic Membrane						structural molecule activity [GO:0005198]	vesicle membrane [GO:0012506]	IPR000638	Gas-vesicle_GvpA
	RCAP_rcc01061	D5AR15	Uncharacterized protein	RCAP_rcc01061	220	Unknown
	RCAP_rcc01062	D5AR16	Gas vesicle protein GvpK	gvpK	112	Unknown					gas vesicle organization [GO:0031412]			IPR007805	Gas-vesicle_GvpK
	RCAP_rcc01063	O69140	4-coumarate--CoA ligase (4CL) (EC 6.2.1.12) (4-coumaroyl-CoA synthase)	pcl	384	Cytoplasmic	TIGR02372;	137	Protein synthesis	tRNA aminoacylation	phenylpropanoid metabolic process [GO:0009698]	4-coumarate-CoA ligase activity [GO:0016207]; ATP binding [GO:0005524]		IPR012743;IPR020845;IPR000873	4_coum_CoA_lig;AMP-binding_CS;AMP-dep_Synth/Lig
*	RCAP_rcc01064	D5AR18	Uncharacterized protein	RCAP_rcc01064	163	Unknown
*	RCAP_rcc01065	D5AR19	Conserved domain protein	RCAP_rcc01065	219	Unknown
*	RCAP_rcc01066	O69138	Photoactive yellow protein (PYP)	pyp	124	Unknown	TIGR02373;	137	Protein synthesis	tRNA aminoacylation	phototransduction [GO:0007602]; protein-chromophore linkage [GO:0018298]; regulation of transcription, DNA-templated [GO:0006355]	photoreceptor activity [GO:0009881]		IPR000014;IPR013767;IPR012130	PAS;PAS_fold;PYP
*	RCAP_rcc01067	D5AR21	Uncharacterized protein	RCAP_rcc01067	142	Cytoplasmic
	RCAP_rcc01068	D5AR22	Uncharacterized protein	RCAP_rcc01068	55	Unknown
	RCAP_rcc01069	D5AR23	Uncharacterized protein	RCAP_rcc01069	38	Unknown
	RCAP_rcc01070	D5AR24	Conserved domain protein	RCAP_rcc01070	150	Unknown
*	RCAP_rcc01071	D5AR25	Uncharacterized protein	RCAP_rcc01071	311	Cytoplasmic
*	RCAP_rcc01072	D5AR26	Histidine ammonia-lyase (EC 4.3.1.3)	hutH	531	Cytoplasmic						histidine ammonia-lyase activity [GO:0004397]		IPR001106;IPR024083;IPR008948;IPR022313	Aromatic_Lyase;Fumarase/histidase_N;L-Aspartase-like;Phe/His_NH3-lyase_AS	ko00340;ko00910
	RCAP_rcc01073	D5AR27	Gas vesicle structural protein	gvpA	70	Cytoplasmic						structural molecule activity [GO:0005198]	gas vesicle [GO:0031411]; vacuole [GO:0005773]; vesicle membrane [GO:0012506]	IPR000638;IPR018493	Gas-vesicle_GvpA;Gas-vesicle_GvpA_CS
	RCAP_rcc01074	D5AR28	Uncharacterized protein	RCAP_rcc01074	32	Unknown
*	RCAP_rcc01075	D5AR29	Methyl-accepting chemotaxis protein	RCAP_rcc01075	579	Cytoplasmic Membrane	TIGR00229;	264	Regulatory functions	Small molecule interactions	chemotaxis [GO:0006935]; signal transduction [GO:0007165]	transmembrane signaling receptor activity [GO:0004888]	integral component of membrane [GO:0016021]	IPR004090;IPR003660;IPR004089;IPR001610;IPR000014;IPR000700	Chemotax_Me-accpt_rcpt;HAMP_linker_domain;MCPsignal_dom;PAC;PAS;PAS-assoc_C
*	RCAP_rcc01076	D5AR30	Conserved domain protein	RCAP_rcc01076	232	Cytoplasmic
	RCAP_rcc01077	D5AR31	Uncharacterized protein	RCAP_rcc01077	115	Unknown								IPR007263	DUF393
*	RCAP_rcc01078	D5AR32	SH3 domain protein	RCAP_rcc01078	92	Unknown								IPR003646	SH3-like_bac-type
*	RCAP_rcc01079	D5AR33	Uncharacterized protein	RCAP_rcc01079	84	Unknown
*	RCAP_rcc01080	D5AR34	Uncharacterized protein	RCAP_rcc01080	325	Extracellular
*	RCAP_rcc01081	D5AR35	Glycosyl transferase, group 1 (EC 2.4.1.-)	RCAP_rcc01081	393	Cytoplasmic						transferase activity, transferring glycosyl groups [GO:0016757]		IPR001296;IPR028098	Glyco_trans_1;Glyco_trans_4_N
*	RCAP_rcc01082	D5AR36	Glycosyl transferase, group 1 (EC 2.4.1.-)	RCAP_rcc01082	397	Cytoplasmic						transferase activity, transferring glycosyl groups [GO:0016757]		IPR015393;IPR001296	DUF1972;Glyco_trans_1
*	RCAP_rcc01083	D5ARH2	UDP-glucuronate 5'-epimerase-1 (EC 5.1.3.12)	lspL1	354	Cytoplasmic						UDP-glucuronate 5'-epimerase activity [GO:0050379]		IPR001509;IPR016040;IPR008089	Epimerase_deHydtase_N;NAD(P)-bd_dom;Nuc_sugar_epim	ko00520
	RCAP_rcc01084	D5ARH3	Membrane protein, putative	RCAP_rcc01084	398	Cytoplasmic Membrane							integral component of membrane [GO:0016021]
	RCAP_rcc01085	D5ARH4	Membrane protein, putative	RCAP_rcc01085	404	Cytoplasmic Membrane							integral component of membrane [GO:0016021]
*	RCAP_rcc01086	D5ARH5	Glycosyl transferase, family 2/group 1 (EC 2.4.1.-)	RCAP_rcc01086	670	Cytoplasmic						transferase activity, transferring glycosyl groups [GO:0016757]		IPR001173;IPR029044	Glyco_trans_2-like;Nucleotide-diphossugar_trans
	RCAP_rcc01087	D5ARH6	Prolyl aminopeptidase-2 (EC 3.4.11.5)	pip2	306	Unknown	TIGR01250;	185	Unclassified	Role category not yet assigned		aminopeptidase activity [GO:0004177]		IPR029058;IPR000073;IPR002410;IPR005945	AB_hydrolase;AB_hydrolase_1;Peptidase_S33;Pro_imino_pep	ko00330
	RCAP_rcc01088	D5ARH7	Autoinducer-binding transcriptional regulator, LuxR family	RCAP_rcc01088	261	Cytoplasmic					regulation of transcription, DNA-templated [GO:0006355]	DNA binding [GO:0003677]		IPR016032;IPR005143;IPR000792;IPR011991	Sig_transdc_resp-reg_C-effctor;TF_LuxR_autoind-bd_dom;Tscrpt_reg_LuxR_C;WHTH_DNA-bd_dom
*	RCAP_rcc01089	D5ARH8	Glutathione ABC transporter, periplasmic glutathione-binding protein GsiB	gsiB	560	Periplasmic					transmembrane transport [GO:0055085]		ATP-binding cassette (ABC) transporter complex [GO:0043190]	IPR030678;IPR023765;IPR000914	Peptide/Ni-bd;SBP_5_CS;SBP_5_dom	ko02010
	RCAP_rcc01090	D5ARH9	Glutathione import ABC transporter, permease protein GsiD	gsiD	354	Cytoplasmic Membrane					transmembrane transport [GO:0055085]		integral component of membrane [GO:0016021]; plasma membrane [GO:0005886]	IPR000515	MetI-like	ko02010
	RCAP_rcc01091	D5ARI0	Glutathione import ABC transporter, permease protein GsiC	gsiC	323	Cytoplasmic Membrane					transmembrane transport [GO:0055085]		integral component of membrane [GO:0016021]; plasma membrane [GO:0005886]	IPR000515	MetI-like	ko02010
	RCAP_rcc01092	D5ARI1	Glutathione import ABC transporter, ATP-binding protein GsiA (EC 3.6.3.-)	gsiA	609	Cytoplasmic Membrane					peptide transport [GO:0015833]	ATPase activity [GO:0016887]; ATP binding [GO:0005524]		IPR003593;IPR003439;IPR017871;IPR013563;IPR027417	AAA+_ATPase;ABC_transporter-like;ABC_transporter_CS;Oligopep_ABC_C;P-loop_NTPase
	RCAP_rcc01093	D5ARI2	Probable cytosol aminopeptidase (EC 3.4.11.1) (Leucine aminopeptidase) (LAP) (EC 3.4.11.10) (Leucyl aminopeptidase)	pepA	491	Unknown						aminopeptidase activity [GO:0004177]; manganese ion binding [GO:0030145]; metalloexopeptidase activity [GO:0008235]	cytoplasm [GO:0005737]	IPR011356;IPR000819;IPR023042;IPR008283	Leucine_aapep/pepB;Peptidase_M17_C;Peptidase_M17_leu_NH2_pept;Peptidase_M17_N	ko00480
*	RCAP_rcc01094	D5ARI3	Flavin-nucleotide-binding protein	RCAP_rcc01094	217	Unknown						cofactor binding [GO:0048037]		IPR024747;IPR012349	Pyridox_Oxase-rel;Split_barrel_FMN-bd
	RCAP_rcc01095	D5ARI4	Transcriptional regulator, GntR family	RCAP_rcc01095	477	Unknown					biosynthetic process [GO:0009058]	catalytic activity [GO:0003824]; DNA binding [GO:0003677]; DNA-binding transcription factor activity [GO:0003700]; pyridoxal phosphate binding [GO:0030170]		IPR004839;IPR015424;IPR015421;IPR000524;IPR011991	Aminotransferase_I/II;PyrdxlP-dep_Trfase;PyrdxlP-dep_Trfase_major_sub1;Tscrpt_reg_HTH_GntR;WHTH_DNA-bd_dom
*	RCAP_rcc01096	D5ARI5	Aminobenzoyl-glutamate utilization protein B (EC 3.4.24.-)	abgB	472	Cytoplasmic	TIGR01891;	138	Protein fate	Degradation of proteins, peptides, and glycopeptides		hydrolase activity [GO:0016787]		IPR017439;IPR017145;IPR002933;IPR011650	Amidohydrolase;Aminobenzoyl-glu_utiliz_pB;Peptidase_M20;Peptidase_M20_dimer
*	RCAP_rcc01097	D5ARI6	HI0933-like protein family	RCAP_rcc01097	395	Cytoplasmic	TIGR00275;	703	Unknown function	Enzymes of unknown specificity				IPR004792;IPR023166	CHP00275_HI0933-like;HI0933_dom
	RCAP_rcc01099	D5ARI7	Transposase, IS4 family	RCAP_rcc01099	153	Cytoplasmic
	RCAP_rcc01100	D5ARI8	Transcriptional regulator, XRE family	RCAP_rcc01100	109	Unknown						sequence-specific DNA binding [GO:0043565]		IPR001387;IPR010982	Cro/C1-type_HTH;Lambda_DNA-bd_dom
*	RCAP_rcc01101	D5ARI9	HipA domain protein	RCAP_rcc01101	426	Unknown								IPR012893;IPR017508;IPR012894	HipA-like_C;HipA_N1;HipA_N2
*	RCAP_rcc01102	D5ARJ0	Uncharacterized protein	RCAP_rcc01102	145	Cytoplasmic
	RCAP_rcc01103	D5ARJ1	Uncharacterized protein	RCAP_rcc01103	175	Unknown
	RCAP_rcc01104	D5ARJ2	Uncharacterized protein	RCAP_rcc01104	123	Cytoplasmic								IPR027417	P-loop_NTPase
	RCAP_rcc01105	D5ARJ3	Uncharacterized protein	RCAP_rcc01105	71	Unknown						ATP binding [GO:0005524]		IPR003959;IPR027417	ATPase_AAA_core;P-loop_NTPase
*	RCAP_rcc01107	D5ARJ4	Uncharacterized protein	RCAP_rcc01107	290	Cytoplasmic
*	RCAP_rcc01108	D5ARJ5	Pyrroline-5-carboxylate reductase (EC 1.5.1.2)	RCAP_rcc01108	246	Cytoplasmic Membrane						pyrroline-5-carboxylate reductase activity [GO:0004735]		IPR016040;IPR028939	NAD(P)-bd_dom;ProC_N	ko00330
*	RCAP_rcc01109	D5ARJ6	Sigma factor SigB regulation protein RsbQ	rsbQ	269	Cytoplasmic								IPR029058;IPR000073	AB_hydrolase;AB_hydrolase_1
*	RCAP_rcc01110	D5ARJ7	Diguanylate cyclase/phosphodiesterase with PAS/PAC sensor (EC 3.1.4.-)	RCAP_rcc01110	727	Cytoplasmic Membrane	TIGR00254;	264	Regulatory functions	Small molecule interactions		hydrolase activity [GO:0016787]		IPR001633;IPR000160;IPR029787;IPR001610;IPR000014	EAL_dom;GGDEF_dom;Nucleotide_cyclase;PAC;PAS
	RCAP_rcc01111	D5ARJ8	Uncharacterized protein	RCAP_rcc01111	54	Unknown
*	RCAP_rcc01112	D5ARJ9	Uncharacterized protein	RCAP_rcc01112	53	Unknown								IPR019600	Hemin_uptake_protein_HemP
*	RCAP_rcc01113	D5ARK0	tRNA-2-methylthio-N(6)-dimethylallyladenosine synthase (EC 2.8.4.3) ((Dimethylallyl)adenosine tRNA methylthiotransferase MiaB) (tRNA-i(6)A37 methylthiotransferase)	miaB	439	Cytoplasmic	TIGR00089;	168	Protein synthesis	tRNA and rRNA base modification	tRNA modification [GO:0006400]	4 iron, 4 sulfur cluster binding [GO:0051539]; metal ion binding [GO:0046872]; transferase activity [GO:0016740]	cytoplasm [GO:0005737]	IPR006638;IPR023970;IPR005839;IPR020612;IPR013848;IPR006463;IPR007197;IPR023404;IPR002792	Elp3/MiaB/NifB;MeThioTfrase/rSAM;Methylthiotransferase;Methylthiotransferase_CS;Methylthiotransferase_N;MiaB_methiolase;rSAM;rSAM_horseshoe;TRAM_dom
*	RCAP_rcc01114	D5ARK1	OmpA/MotB domain protein	RCAP_rcc01114	185	Outer Membrane							membrane [GO:0016020]	IPR006665	OmpA/MotB_C
*	RCAP_rcc01115	D5ARK2	Lipoprotein, putative	RCAP_rcc01115	100	Unknown
*	RCAP_rcc01116	D5ARK3	PhoH family protein	RCAP_rcc01116	339	Cytoplasmic						ATP binding [GO:0005524]		IPR027417;IPR003714	P-loop_NTPase;PhoH
*	RCAP_rcc01117	D5ARK4	Endoribonuclease YbeY (EC 3.1.-.-)	ybeY	170	Cytoplasmic	TIGR00043;	136	Protein synthesis	Other	rRNA processing [GO:0006364]	dTDP-4-dehydrorhamnose 3,5-epimerase activity [GO:0008830]; endoribonuclease activity [GO:0004521]; metalloendopeptidase activity [GO:0004222]; zinc ion binding [GO:0008270]	cytoplasm [GO:0005737]	IPR023091;IPR002036;IPR020549	MetalPrtase_cat_dom_prd;YbeY;YbeY_CS
*	RCAP_rcc01118	D5ARK5	Magnesium and cobalt efflux protein CorC	corC	301	Cytoplasmic Membrane						flavin adenine dinucleotide binding [GO:0050660]		IPR000644;IPR016169;IPR016166;IPR005170	CBS_dom;CO_DH_flavot_FAD-bd_sub2;FAD-bd_2;Transptr-assoc_dom
*	RCAP_rcc01119	D5ARK6	Apolipoprotein N-acyltransferase (ALP N-acyltransferase) (EC 2.3.1.-)	lnt	511	Cytoplasmic Membrane	TIGR00546;	140	Protein fate	Protein modification and repair	lipoprotein biosynthetic process [GO:0042158]	N-acyltransferase activity [GO:0016410]	integral component of membrane [GO:0016021]; plasma membrane [GO:0005886]	IPR004563;IPR003010	Apolipo_AcylTrfase;C-N_Hydrolase
*	RCAP_rcc01120	D5ARK7	S-adenosylmethionine synthase (AdoMet synthase) (EC 2.5.1.6) (MAT) (Methionine adenosyltransferase)	metK	388	Cytoplasmic	TIGR01034;	102	Central intermediary metabolism	Other	one-carbon metabolic process [GO:0006730]; S-adenosylmethionine biosynthetic process [GO:0006556]	ATP binding [GO:0005524]; magnesium ion binding [GO:0000287]; methionine adenosyltransferase activity [GO:0004478]	cytoplasm [GO:0005737]	IPR022631;IPR022630;IPR022629;IPR022628;IPR002133;IPR022636	ADOMET_SYNTHASE_CS;S-AdoMet_synt_C;S-AdoMet_synt_central;S-AdoMet_synt_N;S-AdoMet_synthetase;S-AdoMet_synthetase_sfam	ko00270
*	RCAP_rcc01121	D5ARK8	tRNA (guanine-N(7)-)-methyltransferase (EC 2.1.1.33) (tRNA (guanine(46)-N(7))-methyltransferase) (tRNA(m7G46)-methyltransferase)	trmB	241	Cytoplasmic						tRNA (guanine-N7-)-methyltransferase activity [GO:0008176]		IPR029063;IPR003358	SAM-dependent_MTases;tRNA_(Gua-N-7)_MeTrfase_Trmb
*	RCAP_rcc01122	D5ARK9	3-phosphoshikimate 1-carboxyvinyltransferase (EC 2.5.1.19) (5-enolpyruvylshikimate-3-phosphate synthase) (EPSP synthase) (EPSPS)	aroA	447	Unknown	TIGR01356;	70	Amino acid biosynthesis	Aromatic amino acid family	aromatic amino acid family biosynthetic process [GO:0009073]; chorismate biosynthetic process [GO:0009423]	3-phosphoshikimate 1-carboxyvinyltransferase activity [GO:0003866]	cytoplasm [GO:0005737]	IPR001986;IPR006264;IPR023193;IPR013792	Enolpyruvate_Tfrase_dom;EPSP_synthase;EPSP_synthase_CS;RNA3'P_cycl/enolpyr_Trfase_a/b	ko00400
*	RCAP_rcc01123	D5ARL0	Cytidylate kinase (CK) (EC 2.7.4.25) (Cytidine monophosphate kinase) (CMP kinase)	cmk	195	Cytoplasmic					pyrimidine nucleotide metabolic process [GO:0006220]	ATP binding [GO:0005524]; cytidylate kinase activity [GO:0004127]	cytoplasm [GO:0005737]	IPR003136;IPR011994;IPR027417	Cytidylate_kin;Cytidylate_kinase_dom;P-loop_NTPase	ko00240
*	RCAP_rcc01124	D5ARL1	Nitroreductase/dihydropteridine reductase (EC 1.5.1.34)	nfnB	210	Cytoplasmic						6,7-dihydropteridine reductase activity [GO:0004155]		IPR029479;IPR000415	Nitroreductase;Nitroreductase-like
*	RCAP_rcc01125	D5ARL2	30S ribosomal protein S1	rpsA	559	Cytoplasmic	TIGR00717;	158	Protein synthesis	Ribosomal proteins: synthesis and modification	translation [GO:0006412]	RNA binding [GO:0003723]; structural constituent of ribosome [GO:0003735]	ribosome [GO:0005840]	IPR012340;IPR003029;IPR000110;IPR022967	NA-bd_OB-fold;Rbsml_prot_S1_RNA-bd_dom;Ribosomal_S1;S1_dom	ko03010
*	RCAP_rcc01126	D5ARL3	Integration host factor subunit beta (IHF-beta)	ihfB	95	Cytoplasmic	TIGR00988;	132	DNA metabolism	DNA replication, recombination, and repair	DNA recombination [GO:0006310]; regulation of transcription, DNA-templated [GO:0006355]; regulation of translation [GO:0006417]	DNA binding [GO:0003677]	chromosome [GO:0005694]	IPR000119;IPR020816;IPR010992;IPR005685	Hist_DNA-bd_bac;Histone-like_DNA-bd_CS;IHF-like_DNA-bd_dom;IHF_beta
*	RCAP_rcc01127	D5ARL4	Membrane protein, putative	RCAP_rcc01127	118	Cytoplasmic Membrane							integral component of plasma membrane [GO:0005887]
*	RCAP_rcc01128	D5ARL5	N-(5'-phosphoribosyl)anthranilate isomerase (PRAI) (EC 5.3.1.24)	trpF	223	Cytoplasmic					tryptophan biosynthetic process [GO:0000162]	phosphoribosylanthranilate isomerase activity [GO:0004640]		IPR013785;IPR001240;IPR011060	Aldolase_TIM;PRAI;RibuloseP-bd_barrel	ko00400
*	RCAP_rcc01129	D5ARL6	Tryptophan synthase beta chain (EC 4.2.1.20)	trpB	410	Cytoplasmic	TIGR00263;	70	Amino acid biosynthesis	Aromatic amino acid family		tryptophan synthase activity [GO:0004834]		IPR006653;IPR006654;IPR023026;IPR001926	Trp_synth_b_CS;Trp_synth_beta;Trp_synth_beta/beta-like;TrpB-like_PLP-dep	ko00260;ko00400
	RCAP_rcc01130	D5ARL7	Transcriptional regulator, LuxR family	RCAP_rcc01130	205	Cytoplasmic Membrane					regulation of transcription, DNA-templated [GO:0006355]	DNA binding [GO:0003677]	integral component of membrane [GO:0016021]	IPR016032;IPR000792;IPR011991	Sig_transdc_resp-reg_C-effctor;Tscrpt_reg_LuxR_C;WHTH_DNA-bd_dom
*	RCAP_rcc01131	D5ARL8	HTH-type transcriptional regulator	RCAP_rcc01131	166	Periplasmic						DNA binding [GO:0003677]; DNA-binding transcription factor activity [GO:0003700]		IPR026282;IPR011991	MJ1563;WHTH_DNA-bd_dom
*	RCAP_rcc01132	D5ARL9	Aldose 1-epimerase (EC 5.1.3.3)	galM	332	Unknown					carbohydrate metabolic process [GO:0005975]	aldose 1-epimerase activity [GO:0004034]; carbohydrate binding [GO:0030246]		IPR008183;IPR011013;IPR014718	Aldose_1/G6P_1-epimerase;Gal_mutarotase_SF_dom;Glyco_hydro-type_carb-bd_sub	ko00010
*	RCAP_rcc01133	D5ARM0	Zinc ABC transporter, periplasmic zinc-binding protein ZnuA	znuA	320	Periplasmic					metal ion transport [GO:0030001]	metal ion binding [GO:0046872]		IPR006127	Perip_solute-bd_prot_fam	ko02010
*	RCAP_rcc01134	D5ARM1	Transcriptional regulator, Fur family	RCAP_rcc01134	167	Cytoplasmic						DNA binding [GO:0003677]; DNA-binding transcription factor activity [GO:0003700]		IPR002481;IPR011991	FUR;WHTH_DNA-bd_dom
*	RCAP_rcc01135	D5ARM2	Zinc import ATP-binding protein ZnuC (EC 3.6.3.-)	znuC	263	Cytoplasmic Membrane						ATPase activity [GO:0016887]; ATP binding [GO:0005524]; zinc-transporting ATPase activity [GO:0015633]	plasma membrane [GO:0005886]	IPR003593;IPR003439;IPR017871;IPR027417;IPR017882	AAA+_ATPase;ABC_transporter-like;ABC_transporter_CS;P-loop_NTPase;ZnuC	ko02010
	RCAP_rcc01136	D5ARM3	Zinc ABC transporter, permease protein ZnuB	znuB	261	Cytoplasmic Membrane						ATPase activity, coupled to transmembrane movement of substances [GO:0042626]	ATP-binding cassette (ABC) transporter complex [GO:0043190]; integral component of plasma membrane [GO:0005887]	IPR001626;IPR029022	ABC_3;ABC_BtuC-like	ko02010
*	RCAP_rcc01137	D5ARM4	Phosphofructokinase	pfkB	315	Cytoplasmic	TIGR03168;	168	Protein synthesis	tRNA and rRNA base modification	carbohydrate metabolic process [GO:0005975]	ATP binding [GO:0005524]; kinase activity [GO:0016301]; phosphotransferase activity, alcohol group as acceptor [GO:0016773]		IPR002173;IPR011611;IPR029056;IPR017583	Carboh/pur_kinase_PfkB_CS;PfkB_dom;Ribokinase-like;Tagatose/fructose_Pkinase	ko00010;ko00030;ko00051;ko00052;ko00680
*	RCAP_rcc01138	D5ARM5	Uncharacterized protein	RCAP_rcc01138	69	Unknown
*	RCAP_rcc01139	D5ARM6	Uncharacterized protein	RCAP_rcc01139	329	Unknown
*	RCAP_rcc01140	D5ARM7	Uncharacterized protein	RCAP_rcc01140	134	Cytoplasmic								IPR010428	DUF1025
*	RCAP_rcc01141	D5ARM8	Glutamate--tRNA ligase (EC 6.1.1.17) (Glutamyl-tRNA synthetase) (GluRS)	gltX	442	Cytoplasmic	TIGR00464;	137	Protein synthesis	tRNA aminoacylation	glutamyl-tRNA aminoacylation [GO:0006424]	ATP binding [GO:0005524]; glutamate-tRNA ligase activity [GO:0004818]; tRNA binding [GO:0000049]	cytoplasm [GO:0005737]	IPR008925;IPR020751;IPR001412;IPR004527;IPR000924;IPR020061;IPR020058;IPR014729	aa-tRNA-synth_I_codon-bd;aa-tRNA-synth_I_codon-bd_sub2;aa-tRNA-synth_I_CS;Glu-tRNA-ligase_bac/mito;Glu/Gln-tRNA-synth;Glu/Gln-tRNA-synth_Ib_a-bdl;Glu/Gln-tRNA-synth_Ib_cat-dom;Rossmann-like_a/b/a_fold	ko00860;ko00970
*	RCAP_rcc01142	D5ARM9	Glycine cleavage T protein-1 (EC 2.1.2.10)	gcvT1	369	Cytoplasmic	TIGR00528;	109	Energy metabolism	Amino acids and amines	glycine catabolic process [GO:0006546]	aminomethyltransferase activity [GO:0004047]; transaminase activity [GO:0008483]		IPR006223;IPR028896;IPR013977;IPR006222;IPR029043;IPR027266	GCS_T;GCST/DmdA;GCV_T_C;GCV_T_N;GcvT/YgfZ_C;TrmE/GcvT_dom1	ko00260;ko00670;ko00910
*	RCAP_rcc01143	D5ARN0	Glycine cleavage system H protein	gcvH	120	Cytoplasmic	TIGR00527;	109	Energy metabolism	Amino acids and amines	glycine decarboxylation via glycine cleavage system [GO:0019464]		glycine cleavage complex [GO:0005960]	IPR003016;IPR002930;IPR017453;IPR011053	2-oxoA_DH_lipoyl-BS;GCV_H;GCV_H_sub;Single_hybrid_motif
*	RCAP_rcc01144	D5ARN1	Glycine dehydrogenase (decarboxylating) (EC 1.4.4.2) (Glycine cleavage system P-protein) (Glycine decarboxylase) (Glycine dehydrogenase (aminomethyl-transferring))	gcvP	944	Cytoplasmic	TIGR00461;	109	Energy metabolism	Amino acids and amines	glycine decarboxylation via glycine cleavage system [GO:0019464]	glycine dehydrogenase (decarboxylating) activity [GO:0004375]		IPR003437;IPR020580;IPR020581;IPR015424;IPR015421	GcvP;GDC-P_N;GDC_P;PyrdxlP-dep_Trfase;PyrdxlP-dep_Trfase_major_sub1	ko00260
*	RCAP_rcc01145	D5ARN2	3-oxoacyl-[acyl-carrier-protein] synthase III-1 (EC 2.3.1.180)	fabH1	372	Cytoplasmic					fatty acid biosynthetic process [GO:0006633]	3-oxoacyl-[acyl-carrier-protein] synthase activity [GO:0004315]; beta-ketoacyl-acyl-carrier-protein synthase III activity [GO:0033818]		IPR013751;IPR013747;IPR018201;IPR016039;IPR016038	ACP_syn_III;ACP_syn_III_C;Ketoacyl_synth_AS;Thiolase-like;Thiolase-like_subgr	ko00061
*	RCAP_rcc01146	D5ARN3	Glyoxylate reductase-2 (EC 1.1.1.26)	gyaR2	313	Cytoplasmic						glyoxylate reductase activity [GO:0047964]; NAD binding [GO:0051287]		IPR006139;IPR006140;IPR016040	D-isomer_2_OHA_DH_cat_dom;D-isomer_DH_NAD-bd;NAD(P)-bd_dom
*	RCAP_rcc01147	D5ARN4	Chaperone CsaA	csaA	112	Cytoplasmic	TIGR02222;	95	Protein fate	Protein folding and stabilization		tRNA binding [GO:0000049]		IPR012340;IPR008231;IPR002547	NA-bd_OB-fold;Secretion_chaperone_CsaA;tRNA-bd_dom
*	RCAP_rcc01148	D5ARN5	Pyrroline-5-carboxylate reductase (P5C reductase) (P5CR) (EC 1.5.1.2) (PCA reductase)	proC	270	Cytoplasmic Membrane	TIGR00112;	73	Amino acid biosynthesis	Glutamate family	L-proline biosynthetic process [GO:0055129]	pyrroline-5-carboxylate reductase activity [GO:0004735]	cytoplasm [GO:0005737]	IPR008927;IPR016040;IPR029036;IPR028939;IPR000304	6-PGluconate_DH_C-like;NAD(P)-bd_dom;P5CR_dimer;ProC_N;Pyrroline-COOH_reductase	ko00330
	RCAP_rcc01149	D5ARN6	Uncharacterized protein	RCAP_rcc01149	167	Unknown								IPR019660	Put_sensory_transdc_reg_YbjN
*	RCAP_rcc01150	D5ARN7	Chorismate synthase (CS) (EC 4.2.3.5) (5-enolpyruvylshikimate-3-phosphate phospholyase)	aroC	366	Cytoplasmic	TIGR00033;	70	Amino acid biosynthesis	Aromatic amino acid family	aromatic amino acid family biosynthetic process [GO:0009073]; chorismate biosynthetic process [GO:0009423]	chorismate synthase activity [GO:0004107]		IPR000453;IPR020541	Chorismate_synth;Chorismate_synthase_CS	ko00400
*	RCAP_rcc01151	D5ARN8	Uncharacterized protein	RCAP_rcc01151	100	Unknown								IPR011008;IPR010753	Dimeric_a/b-barrel;DUF1330
*	RCAP_rcc01152	O30723	Phosphoribosyl-ATP pyrophosphatase (PRA-PH) (EC 3.6.1.31)	hisE	103	Cytoplasmic	TIGR03188;	161	Amino acid biosynthesis	Histidine family	histidine biosynthetic process [GO:0000105]	ATP binding [GO:0005524]; phosphoribosyl-ATP diphosphatase activity [GO:0004636]	cytoplasm [GO:0005737]	IPR008179;IPR021130	PRib-ATP_PPHydrolase;PRib-ATP_PPHydrolase-like	ko00340
*	RCAP_rcc01153	O30724	Imidazole glycerol phosphate synthase subunit HisF (EC 4.3.2.10) (IGP synthase cyclase subunit) (IGP synthase subunit HisF) (ImGP synthase subunit HisF) (IGPS subunit HisF)	hisF	253	Cytoplasmic	TIGR00735;	161	Amino acid biosynthesis	Histidine family	histidine biosynthetic process [GO:0000105]	imidazoleglycerol-phosphate synthase activity [GO:0000107]; lyase activity [GO:0016829]	cytoplasm [GO:0005737]	IPR013785;IPR006062;IPR004651;IPR011060	Aldolase_TIM;His_biosynth;HisF;RibuloseP-bd_barrel	ko00340
*	RCAP_rcc01154	O30725	1-(5-phosphoribosyl)-5-[(5-phosphoribosylamino)methylideneamino] imidazole-4-carboxamide isomerase (EC 5.3.1.16) (Phosphoribosylformimino-5-aminoimidazole carboxamide ribotide isomerase)	hisA	239	Cytoplasmic	TIGR00007;	161	Amino acid biosynthesis	Histidine family	histidine biosynthetic process [GO:0000105]	1-(5-phosphoribosyl)-5-[(5-phosphoribosylamino)methylideneamino]imidazole-4-carboxamide isomerase activity [GO:0003949]	cytoplasm [GO:0005737]	IPR013785;IPR006062;IPR006063;IPR023016;IPR011060	Aldolase_TIM;His_biosynth;HisA;Isoase_HisA;RibuloseP-bd_barrel	ko00340
*	RCAP_rcc01155	D5ARP2	Uncharacterized protein	RCAP_rcc01155	127	Unknown								IPR019223	DUF2147
*	RCAP_rcc01156	D5ARP3	UspA domain protein	RCAP_rcc01156	279	Cytoplasmic								IPR014729;IPR006015;IPR006016	Rossmann-like_a/b/a_fold;Universal_stress_UspA;UspA
*	RCAP_rcc01157	D5ARP4	Cytochrome c oxidase, Cbb3-type, subunit I (EC 1.9.3.1)	ccoN	532	Cytoplasmic Membrane	TIGR00780;	112	Energy metabolism	Electron transport	aerobic respiration [GO:0009060]	cytochrome-c oxidase activity [GO:0004129]; heme binding [GO:0020037]; metal ion binding [GO:0046872]	integral component of membrane [GO:0016021]; plasma membrane respiratory chain complex IV [GO:0045278]	IPR000883;IPR023615;IPR023616;IPR004677	COX1;Cyt_c_Oxase_su1_BS;Cyt_c_Oxase_su1_dom;Cyt_c_oxidase_cbb3_su1	ko00190
*	RCAP_rcc01158	D5ARP5	Cytochrome c oxidase, Cbb3-type, subunit II (EC 1.9.3.1)	ccoO	242	Unknown	TIGR00781;	112	Energy metabolism	Electron transport	aerobic respiration [GO:0009060]	cytochrome-c oxidase activity [GO:0004129]; heme binding [GO:0020037]; metal ion binding [GO:0046872]	integral component of membrane [GO:0016021]	IPR000883;IPR009056;IPR003468	COX1;Cyt_c-like_dom;Cyt_c_oxidase_monohaem-su/FixO	ko00190
*	RCAP_rcc01159	D5ARP6	Cytochrome c oxidase, Cbb3-type, subunit IV (EC 1.9.3.1)	ccoQ	58	Unknown						cytochrome-c oxidase activity [GO:0004129]	integral component of membrane [GO:0016021]	IPR008621	Cbb3-typ_cyt_oxidase_comp	ko00190
*	RCAP_rcc01160	D5ARP7	Cbb3-type cytochrome c oxidase subunit CcoP (Cbb3-Cox subunit CcoP) (C-type cytochrome CcoP) (Cyt c(P)) (Cytochrome c oxidase subunit III)	ccoP	297	Unknown	TIGR00782;	112	Energy metabolism	Electron transport	ion transport [GO:0006811]; oxidative phosphorylation [GO:0006119]	electron transfer activity [GO:0009055]; heme binding [GO:0020037]; metal ion binding [GO:0046872]	integral component of membrane [GO:0016021]; plasma membrane [GO:0005886]; respirasome [GO:0070469]	IPR009056;IPR004678	Cyt_c-like_dom;Cyt_c_oxidase_cbb3_su3	ko00190
*	RCAP_rcc01161	D5ARP8	Cytochrome c oxidase, Cbb3-type, accessory protein CcoG	ccoG	486	Cytoplasmic Membrane	TIGR02745;	112	Energy metabolism	Electron transport	oxidation-reduction process [GO:0055114]		integral component of membrane [GO:0016021]	IPR001450;IPR017896;IPR017900;IPR014116;IPR013783	4Fe4S-bd_dom;4Fe4S_Fe-S-bd;4Fe4S_Fe_S_CS;Cyt_c_oxidase_cbb3_FixG;Ig-like_fold
*	RCAP_rcc01162	D5ARP9	Cytochrome c oxidase, Cbb3-type, biogenesis protein CcoH	ccoH	151	Cytoplasmic Membrane								IPR008620;IPR018037	FixH;FixH_proteobacterial
*	RCAP_rcc01163	D5ARQ0	Cytochrome c oxidase, Cbb3-type, biogenesis protein CcoI (EC 3.6.3.4)	ccoI	742	Cytoplasmic Membrane	TIGR01525;TIGR01494;	145	Transport and binding proteins	Cations and iron carrying compounds		copper-exporting ATPase activity [GO:0004008]; metal ion binding [GO:0046872]; nucleotide binding [GO:0000166]	integral component of membrane [GO:0016021]; plasma membrane [GO:0005886]	IPR023299;IPR018303;IPR008250;IPR023214;IPR006121;IPR027256;IPR001757	ATPase_P-typ_cyto_domN;ATPase_P-typ_P_site;ATPase_P-typ_transduc_dom_A;HAD-like_dom;HeavyMe-assoc_HMA;P-typ_ATPase_IB;P_typ_ATPase
	RCAP_rcc01164	D5ARQ1	Cytochrome c oxidase, Cbb3-type, maturation protein CcoS	ccoS	52	Cytoplasmic Membrane	TIGR00847;	112	Energy metabolism	Electron transport			integral component of membrane [GO:0016021]	IPR004714	Cyt_oxidase_maturation_cbb3
	RCAP_rcc01165	D5ARQ2	D-alanyl-D-alanine carboxypeptidase-1 (EC 3.4.16.4)	dacC1	538	Cytoplasmic Membrane						serine-type D-Ala-D-Ala carboxypeptidase activity [GO:0009002]		IPR012338;IPR018044;IPR001967	Beta-lactam/transpept-like;Peptidase_S11;Peptidase_S11_N
*	RCAP_rcc01166	D5ARQ3	Hydrolase, HAD superfamily	RCAP_rcc01166	236	Cytoplasmic						hydrolase activity [GO:0016787]		IPR023214;IPR023198	HAD-like_dom;PGP_dom2
*	RCAP_rcc01167	D5ARQ4	ATP-dependent Clp protease adapter protein ClpS	clpS	117	Cytoplasmic					protein catabolic process [GO:0030163]	peptidase activity [GO:0008233]		IPR022935;IPR003769;IPR014719	ClpS;ClpS_core;Ribosomal_L7/12_C/ClpS-like
*	RCAP_rcc01168	D5ARQ5	Methyltransferase small domain protein (EC 2.1.1.-)	RCAP_rcc01168	354	Cytoplasmic						methyltransferase activity [GO:0008168]		IPR029063;IPR007848	SAM-dependent_MTases;Small_mtfrase_dom
*	RCAP_rcc01169	D5ARQ6	Lipoprotein, putative	RCAP_rcc01169	136	Cytoplasmic
	RCAP_rcc01170	D5ARQ7	Uncharacterized protein	RCAP_rcc01170	71	Unknown
*	RCAP_rcc01171	D5ARQ8	ATP-dependent RNA helicase DbpA (EC 3.6.1.-)	RCAP_rcc01171	670	Cytoplasmic						ATP binding [GO:0005524]; helicase activity [GO:0004386]; nucleic acid binding [GO:0003676]		IPR005580;IPR011545;IPR014001;IPR001650;IPR027417;IPR000629;IPR014014	DbpA_RNA-bd_dom;DEAD/DEAH_box_helicase_dom;Helicase_ATP-bd;Helicase_C;P-loop_NTPase;RNA-helicase_DEAD-box_CS;RNA_helicase_DEAD_Q_motif	ko03018
*	RCAP_rcc01172	D5ARQ9	Uroporphyrinogen decarboxylase (UPD) (URO-D) (EC 4.1.1.37)	hemE	344	Cytoplasmic	TIGR01464;	79	Biosynthesis of cofactors, prosthetic groups, and carriers	Heme, porphyrin, and cobalamin	protoporphyrinogen IX biosynthetic process [GO:0006782]	uroporphyrinogen decarboxylase activity [GO:0004853]	cytoplasm [GO:0005737]	IPR006361;IPR000257	Uroporphyrinogen_deCO2ase_HemE;Uroporphyrinogen_deCOase	ko00860
*	RCAP_rcc01173	D5ARR0	Porphobilinogen deaminase (PBG) (EC 2.5.1.61) (Hydroxymethylbilane synthase) (HMBS) (Pre-uroporphyrinogen synthase)	hemC	317	Cytoplasmic	TIGR00212;	79	Biosynthesis of cofactors, prosthetic groups, and carriers	Heme, porphyrin, and cobalamin	chlorophyll biosynthetic process [GO:0015995]; peptidyl-pyrromethane cofactor linkage [GO:0018160]; protoporphyrinogen IX biosynthetic process [GO:0006782]	hydroxymethylbilane synthase activity [GO:0004418]		IPR000860;IPR022419;IPR022417;IPR022418	hemC;Porphobilin_deaminase_cofac_BS;Porphobilin_deaminase_N;Porphobilinogen_deaminase_C	ko00860
*	RCAP_rcc01174	D5ARR1	D-2-hydroxyglutarate dehydrogenase (EC 1.1.99.-)	RCAP_rcc01174	458	Cytoplasmic						FAD binding [GO:0071949]; oxidoreductase activity [GO:0016491]		IPR016169;IPR016166;IPR016167;IPR016164;IPR004113;IPR006094;IPR016171	CO_DH_flavot_FAD-bd_sub2;FAD-bd_2;FAD-bd_2_sub1;FAD-linked_Oxase-like_C;FAD-linked_oxidase_C;Oxid_FAD_bind_N;Vanillyl_alc_oxidase_C-sub2
	RCAP_rcc01175	D5ARR2	Major facilitator superfamily MFS_1	RCAP_rcc01175	400	Cytoplasmic Membrane							integral component of membrane [GO:0016021]	IPR011701;IPR020846	MFS;MFS_dom
*	RCAP_rcc01176	D5ARR3	GDSL-like lipase/acylhydrolase family protein	RCAP_rcc01176	219	Periplasmic						hydrolase activity [GO:0016787]		IPR013830	SGNH_hydro
*	RCAP_rcc01177	D5ARR4	ABC transporter ATP-binding protein (EC 3.6.3.-)	RCAP_rcc01177	222	Cytoplasmic Membrane						ATPase activity [GO:0016887]; ATP binding [GO:0005524]		IPR003593;IPR003439;IPR017871;IPR027417	AAA+_ATPase;ABC_transporter-like;ABC_transporter_CS;P-loop_NTPase
*	RCAP_rcc01178	D5ARR5	Uncharacterized protein	RCAP_rcc01178	835	Cytoplasmic Membrane							integral component of membrane [GO:0016021]; plasma membrane [GO:0005886]	IPR003838	ABC_permease_dom
*	RCAP_rcc01179	D5ARR6	Transglycosylase, Slt family	RCAP_rcc01179	155	Unknown								IPR023346;IPR008258	Lysozyme-like_dom;TGlycosylase-like_SLT
*	RCAP_rcc01180	D5ARR7	Copper-transporting P-type ATPase-2 (EC 3.6.3.4)	copA2	806	Cytoplasmic Membrane	TIGR01525;TIGR01494;	145	Transport and binding proteins	Cations and iron carrying compounds		copper-exporting ATPase activity [GO:0004008]; metal ion binding [GO:0046872]; nucleotide binding [GO:0000166]	integral component of membrane [GO:0016021]; plasma membrane [GO:0005886]	IPR023299;IPR018303;IPR008250;IPR023214;IPR017969;IPR006121;IPR027256;IPR001757	ATPase_P-typ_cyto_domN;ATPase_P-typ_P_site;ATPase_P-typ_transduc_dom_A;HAD-like_dom;Heavy-metal-associated_CS;HeavyMe-assoc_HMA;P-typ_ATPase_IB;P_typ_ATPase
	RCAP_rcc01181	D5ARR8	Membrane protein, putative	RCAP_rcc01181	69	Cytoplasmic Membrane							integral component of membrane [GO:0016021]	IPR021309	DUF2892
*	RCAP_rcc01182	D5ARR9	Imidazole glycerol phosphate synthase subunit HisH (EC 4.3.2.10) (IGP synthase glutaminase subunit) (EC 3.5.1.2) (IGP synthase subunit HisH) (ImGP synthase subunit HisH) (IGPS subunit HisH)	hisH	213	Cytoplasmic	TIGR01855;	161	Amino acid biosynthesis	Histidine family	glutamine metabolic process [GO:0006541]; histidine biosynthetic process [GO:0000105]	glutaminase activity [GO:0004359]; imidazoleglycerol-phosphate synthase activity [GO:0000107]; lyase activity [GO:0016829]	cytoplasm [GO:0005737]	IPR029062;IPR017926;IPR010139	Class_I_gatase-like;GATASE;Imidazole-glycPsynth_HisH	ko00340
*	RCAP_rcc01183	D5ARS0	Imidazoleglycerol-phosphate dehydratase (IGPD) (EC 4.2.1.19)	hisB	195	Cytoplasmic					histidine biosynthetic process [GO:0000105]	imidazoleglycerol-phosphate dehydratase activity [GO:0004424]	cytoplasm [GO:0005737]	IPR000807;IPR020565;IPR020568	ImidazoleglycerolP_deHydtase;ImidazoleglycerP_deHydtase_CS;Ribosomal_S5_D2-typ_fold	ko00340
*	RCAP_rcc01184	D5ARS1	CsbD family protein	RCAP_rcc01184	65	Unknown								IPR008462;IPR026042	CsbD;YjbJ
*	RCAP_rcc01185	D5ARS2	Methyl-accepting chemotaxis sensory transducer	RCAP_rcc01185	734	Cytoplasmic Membrane					signal transduction [GO:0007165]		integral component of membrane [GO:0016021]	IPR003660;IPR004089	HAMP_linker_domain;MCPsignal_dom
	RCAP_rcc01186	D5ARS3	Uncharacterized protein	RCAP_rcc01186	721	Unknown					nucleotide catabolic process [GO:0009166]	hydrolase activity [GO:0016787]		IPR011048;IPR027372;IPR015943	Haem_d1;Phytase-like_dom;WD40/YVTN_repeat-like_dom
	RCAP_rcc01187	D5ARS4	Phosphonates import ATP-binding protein PhnC (EC 7.3.2.2)	phnC	273	Cytoplasmic Membrane	TIGR02315;	143	Transport and binding proteins	Anions		ATPase-coupled organic phosphonate transmembrane transporter activity [GO:0015416]; ATP binding [GO:0005524]	plasma membrane [GO:0005886]	IPR003593;IPR003439;IPR017871;IPR012693;IPR027417	AAA+_ATPase;ABC_transporter-like;ABC_transporter_CS;ABC_transpr_PhnC;P-loop_NTPase	ko02010
	RCAP_rcc01188	D5ARS5	Phosphonate ABC transporter, periplasmic phosphonate-binding protein PhnD	phnD	307	Periplasmic	TIGR01098;TIGR03431;	143	Transport and binding proteins	Anions	organic phosphonate transport [GO:0015716]; transmembrane transport [GO:0055085]		ATP-binding cassette (ABC) transporter complex [GO:0043190]	IPR005770;IPR017797	PhnD;Phosphnate-bd	ko02010
	RCAP_rcc01189	D5ARS6	Phosphonate ABC transporter, permease protein PhnE-1	phnE1	284	Cytoplasmic Membrane	TIGR01097;	143	Transport and binding proteins	Anions		organic phosphonate transmembrane transporter activity [GO:0015604]	integral component of plasma membrane [GO:0005887]	IPR000515;IPR005769	MetI-like;PhnE/PtxC	ko02010
	RCAP_rcc01190	D5ARS7	Phosphonate ABC transporter, permease protein PhnE-2	phnE2	444	Cytoplasmic Membrane	TIGR01097;	143	Transport and binding proteins	Anions		organic phosphonate transmembrane transporter activity [GO:0015604]	integral component of plasma membrane [GO:0005887]	IPR000515;IPR005769	MetI-like;PhnE/PtxC	ko02010
	RCAP_rcc01191	D5ARS8	Transferase hexapeptide repeat family protein	RCAP_rcc01191	208	Cytoplasmic	TIGR03308;	97	Protein fate	Protein and peptide secretion and trafficking		transferase activity [GO:0016740]		IPR001451;IPR018357;IPR017694;IPR011004	Hexapep_transf;Hexapep_transf_CS;Phosphonate_tfrase_rpt;Trimer_LpxA-like
	RCAP_rcc01192	D5ARS9	Phosphonates metabolism transcriptional regulator PhnF	phnF	244	Cytoplasmic	TIGR02325;	143	Transport and binding proteins	Anions		DNA binding [GO:0003677]; DNA-binding transcription factor activity [GO:0003700]		IPR028978;IPR012702;IPR000524;IPR011663;IPR011991	Chorismate_lyase_/UTRA_dom;CP_lyase_PhnF;Tscrpt_reg_HTH_GntR;UTRA;WHTH_DNA-bd_dom
	RCAP_rcc01193	D5ART0	Phosphonate metabolism protein PhnG	phnG	148	Unknown	TIGR03293;	159	Energy metabolism	Methanogenesis	organic phosphonate metabolic process [GO:0019634]; organic phosphonate transport [GO:0015716]			IPR009609	Phosphonate_metab_PhnG
	RCAP_rcc01194	D5ART1	Phosphonate metabolism protein PhnH	phnH	188	Unknown	TIGR03292;	159	Energy metabolism	Methanogenesis	organic phosphonate metabolic process [GO:0019634]			IPR008772	Phosphonate_metab_PhnH
	RCAP_rcc01195	D5ART2	Phosphonate metabolism protein PhnI	phnI	357	Cytoplasmic					organic phosphonate metabolic process [GO:0019634]			IPR008773	PhnI
	RCAP_rcc01197	D5ART3	Alpha-D-ribose 1-methylphosphonate 5-phosphate C-P lyase (PRPn C-P lyase) (EC 4.7.1.1)	phnJ	287	Cytoplasmic					organic phosphonate catabolic process [GO:0019700]	4 iron, 4 sulfur cluster binding [GO:0051539]; alpha-D-ribose 1-methylphosphonate 5-phosphate C-P-lyase activity [GO:0098848]; metal ion binding [GO:0046872]		IPR010306	PhnJ
	RCAP_rcc01198	D5ART4	Phosphonates transport ATP-binding protein PhnK (EC 3.6.3.-)	phnK	268	Cytoplasmic Membrane	TIGR02323;	103	Central intermediary metabolism	Phosphorus compounds		ATPase activity [GO:0016887]; ATP binding [GO:0005524]		IPR003593;IPR003439;IPR017871;IPR012700;IPR027417	AAA+_ATPase;ABC_transporter-like;ABC_transporter_CS;CP_lyase_PhnK;P-loop_NTPase	ko02010
	RCAP_rcc01199	D5ART5	Phosphonates transport ATP-binding protein PhnL (EC 3.6.3.-)	phnL	227	Cytoplasmic Membrane	TIGR02324;	103	Central intermediary metabolism	Phosphorus compounds		ATPase activity [GO:0016887]; ATP binding [GO:0005524]		IPR003593;IPR003439;IPR017871;IPR012701;IPR027417	AAA+_ATPase;ABC_transporter-like;ABC_transporter_CS;CP_lyase_PhnL;P-loop_NTPase	ko02010
	RCAP_rcc01200	D5ART6	Ribose 1,5-bisphosphate phosphokinase PhnN (EC 2.7.4.23) (Ribose 1,5-bisphosphokinase)	phnN	184	Cytoplasmic	TIGR02322;	103	Central intermediary metabolism	Phosphorus compounds	5-phosphoribose 1-diphosphate biosynthetic process [GO:0006015]; organic phosphonate metabolic process [GO:0019634]	ATP binding [GO:0005524]; ribose 1,5-bisphosphate phosphokinase activity [GO:0033863]		IPR008145;IPR027417;IPR012699	GK/Ca_channel_bsu;P-loop_NTPase;PhnN	ko00030
	RCAP_rcc01201	D5ART7	Uncharacterized protein	RCAP_rcc01201	223	Unknown	TIGR03223;	184	Energy metabolism	Other				IPR009389	DUF1045
	RCAP_rcc01202	D5ART8	Phosphonate metabolism protein PhnM	phnM	380	Cytoplasmic	TIGR02318;	184	Energy metabolism	Other	organic phosphonate catabolic process [GO:0019700]	hydrolase activity, acting on carbon-nitrogen (but not peptide) bonds [GO:0016810]		IPR011059;IPR012696	Metal-dep_hydrolase_composite;Phosphono_PhnM
*	RCAP_rcc01203	D5ART9	Pyruvate carboxylase (EC 6.4.1.1)	pyc	1144	Cytoplasmic	TIGR01235;	116	Energy metabolism	Glycolysis/gluconeogenesis	gluconeogenesis [GO:0006094]; pyruvate metabolic process [GO:0006090]	ATP binding [GO:0005524]; biotin binding [GO:0009374]; metal ion binding [GO:0046872]; pyruvate carboxylase activity [GO:0004736]		IPR013785;IPR011761;IPR013815;IPR013816;IPR001882;IPR011764;IPR005482;IPR000089;IPR005481;IPR003379;IPR005479;IPR009057;IPR016185;IPR000891;IPR005930;IPR011054;IPR011053	Aldolase_TIM;ATP-grasp;ATP_grasp_subdomain_1;ATP_grasp_subdomain_2;Biotin_BS;Biotin_carboxylation_dom;Biotin_COase_C;Biotin_lipoyl;CarbamoylP_synth_lsu_N;Carboxylase_cons_dom;CbamoylP_synth_lsu-like_ATP-bd;Homeodomain-like;PreATP-grasp_dom;PYR_CT;Pyruv_COase;Rudment_hybrid_motif;Single_hybrid_motif	ko00020;ko00620
*	RCAP_rcc01204	D5ARU0	Peptidoglycan binding domain protein	RCAP_rcc01204	594	Cytoplasmic Membrane						peptidoglycan binding [GO:0042834]		IPR002477;IPR007730;IPR009003	Peptidoglycan-bd-like;Sporulation-related_dom;Trypsin-like_Pept_dom
*	RCAP_rcc01205	D5ARU1	Glycine--tRNA ligase alpha subunit (EC 6.1.1.14) (Glycyl-tRNA synthetase alpha subunit) (GlyRS)	glyQ	312	Cytoplasmic	TIGR00388;	137	Protein synthesis	tRNA aminoacylation	glycyl-tRNA aminoacylation [GO:0006426]	ATP binding [GO:0005524]; glycine-tRNA ligase activity [GO:0004820]	cytoplasm [GO:0005737]	IPR006194;IPR002310	Gly-tRNA-synth_heterodimer;Gly-tRNA_ligase_asu	ko00970
	RCAP_rcc01206	D5ARU2	Uncharacterized protein	RCAP_rcc01206	136	Unknown
*	RCAP_rcc01207	D5ARU3	Glycine--tRNA ligase beta subunit (EC 6.1.1.14) (Glycyl-tRNA synthetase beta subunit) (GlyRS)	glyS	754	Cytoplasmic	TIGR00211;	137	Protein synthesis	tRNA aminoacylation	arginyl-tRNA aminoacylation [GO:0006420]; glycyl-tRNA aminoacylation [GO:0006426]	arginine-tRNA ligase activity [GO:0004814]; ATP binding [GO:0005524]; glycine-tRNA ligase activity [GO:0004820]	cytoplasm [GO:0005737]	IPR008909;IPR015944;IPR006194	DALR_anticod-bd;Gly-tRNA-synth_bsu;Gly-tRNA-synth_heterodimer	ko00970
*	RCAP_rcc01208	D5ARU4	Pyruvate, phosphate dikinase (Pyruvate, orthophosphatedikinase) (EC 2.7.9.1)	ppdK	845	Cytoplasmic					pyruvate metabolic process [GO:0006090]	kinase activity [GO:0016301]; metal ion binding [GO:0046872]; pyruvate, phosphate dikinase activity [GO:0050242]		IPR013815;IPR013816;IPR008279;IPR018274;IPR000121;IPR002192;IPR010121;IPR015813	ATP_grasp_subdomain_1;ATP_grasp_subdomain_2;PEP-util_enz_mobile_dom;PEP_util_AS;PEP_util_C;PPDK_PEP-bd;Pyruvate_phosphate_dikinase;Pyrv/PenolPyrv_Kinase-like_dom	ko00620;ko00710
	RCAP_rcc01209	D5ARU5	Cell wall hydrolase, SleB	RCAP_rcc01209	233	Unknown						hydrolase activity [GO:0016787]		IPR011105	Cell_wall_hydrolase_SleB
*	RCAP_rcc01210	D5ARU6	Dihydroneopterin aldolase (EC 4.1.2.25)	folB	303	Cytoplasmic					folic acid-containing compound metabolic process [GO:0006760]	dihydroneopterin aldolase activity [GO:0004150]		IPR006157	FolB_dom	ko00790
*	RCAP_rcc01211	D5ARU7	Dihydropteroate synthase (DHPS) (EC 2.5.1.15) (Dihydropteroate pyrophosphorylase)	folP	338	Cytoplasmic	TIGR01496;	78	Biosynthesis of cofactors, prosthetic groups, and carriers	Folic acid	folic acid biosynthetic process [GO:0046656]; tetrahydrofolate biosynthetic process [GO:0046654]	dihydropteroate synthase activity [GO:0004156]; metal ion binding [GO:0046872]		IPR006390;IPR011005;IPR000489	DHP_synth;Dihydropteroate_synth-like;Pterin-binding	ko00790
*	RCAP_rcc01212	D5ARU8	Phosphoglucosamine mutase (EC 5.4.2.10)	glmM	448	Cytoplasmic	TIGR01455;	89	Cell envelope	Biosynthesis and degradation of murein sacculus and peptidoglycan	carbohydrate metabolic process [GO:0005975]	magnesium ion binding [GO:0000287]; phosphoglucosamine mutase activity [GO:0008966]		IPR005844;IPR016055;IPR005845;IPR005846;IPR005843;IPR016066;IPR005841;IPR006352	A-D-PHexomutase_a/b/a-I;A-D-PHexomutase_a/b/a-I/II/III;A-D-PHexomutase_a/b/a-II;A-D-PHexomutase_a/b/a-III;A-D-PHexomutase_C;A-D-PHexomutase_CS;Alpha-D-phosphohexomutase_SF;GlmM	ko00520
*	RCAP_rcc01213	D5ARU9	Membrane protein, putative	RCAP_rcc01213	122	Cytoplasmic Membrane							integral component of membrane [GO:0016021]
*	RCAP_rcc01214	D5ARV0	Ketol-acid reductoisomerase (NADP(+)) (KARI) (EC 1.1.1.86) (Acetohydroxy-acid isomeroreductase) (AHIR) (Alpha-keto-beta-hydroxylacyl reductoisomerase)	ilvC	340	Cytoplasmic	TIGR00465;	74	Amino acid biosynthesis	Pyruvate family	isoleucine biosynthetic process [GO:0009097]; valine biosynthetic process [GO:0009099]	isomerase activity [GO:0016853]; ketol-acid reductoisomerase activity [GO:0004455]; magnesium ion binding [GO:0000287]; NADP binding [GO:0050661]		IPR008927;IPR013328;IPR013023;IPR000506;IPR013116	6-PGluconate_DH_C-like;6PGD_dom_2;AcH_isomrdctse;AcH_isomrdctse_C;IlvN	ko00290;ko00770
	RCAP_rcc01215	D5ARV1	Transcriptional regulator, AsnC/Lrp family	RCAP_rcc01215	152	Cytoplasmic						DNA-binding transcription factor activity [GO:0003700]; sequence-specific DNA binding [GO:0043565]		IPR000485;IPR011008;IPR019888;IPR019887;IPR011991	AsnC-type_HTH_dom;Dimeric_a/b-barrel;Tscrpt_reg_AsnC-typ;Tscrpt_reg_AsnC-typ_C;WHTH_DNA-bd_dom
*	RCAP_rcc01216	D5ARV2	Transcriptional regulator, AsnC/Lrp family	RCAP_rcc01216	152	Cytoplasmic						DNA-binding transcription factor activity [GO:0003700]; sequence-specific DNA binding [GO:0043565]		IPR000485;IPR011008;IPR019888;IPR019887;IPR019885;IPR011991	AsnC-type_HTH_dom;Dimeric_a/b-barrel;Tscrpt_reg_AsnC-typ;Tscrpt_reg_AsnC-typ_C;Tscrpt_reg_HTH_AsnC-type_CS;WHTH_DNA-bd_dom
	RCAP_rcc01217	D5ARV3	Urease accessory protein UreD	ureD	270	Cytoplasmic					nitrogen compound metabolic process [GO:0006807]	nickel cation binding [GO:0016151]	cytoplasm [GO:0005737]	IPR002669	UreD
*	RCAP_rcc01218	D5ARV4	Urease subunit gamma (EC 3.5.1.5) (Urea amidohydrolase subunit gamma)	ureA	100	Cytoplasmic	TIGR00193;	160	Central intermediary metabolism	Nitrogen metabolism	urea catabolic process [GO:0043419]	nickel cation binding [GO:0016151]; urease activity [GO:0009039]	cytoplasm [GO:0005737]	IPR012010;IPR002026	Urease_gamma;Urease_gamma/gamma-beta_su	ko00230;ko00330;ko00791
*	RCAP_rcc01219	D5AS85	Urease subunit beta (EC 3.5.1.5) (Urea amidohydrolase subunit beta)	ureB	101	Cytoplasmic	TIGR00192;	160	Central intermediary metabolism	Nitrogen metabolism	urea catabolic process [GO:0043419]	urease activity [GO:0009039]	cytoplasm [GO:0005737]	IPR002019	Urease_beta	ko00230;ko00330;ko00791
*	RCAP_rcc01220	D5AS86	Urease subunit alpha (EC 3.5.1.5) (Urea amidohydrolase subunit alpha)	ureC	568	Cytoplasmic	TIGR01792;	160	Central intermediary metabolism	Nitrogen metabolism	urea catabolic process [GO:0043419]	nickel cation binding [GO:0016151]; urease activity [GO:0009039]	cytoplasm [GO:0005737]	IPR006680;IPR011059;IPR011612;IPR017950;IPR005848;IPR017951;IPR029754	Amidohydro_1;Metal-dep_hydrolase_composite;Urease_alpha_N_dom;Urease_AS;Urease_asu;Urease_asu_c;Urease_Ni-bd	ko00230;ko00330;ko00791;ko05120
*	RCAP_rcc01221	D5AS87	Uncharacterized protein	RCAP_rcc01221	116	Unknown
	RCAP_rcc01222	D5AS88	Urease accessory protein UreE	ureE	156	Cytoplasmic					enzyme active site formation [GO:0018307]; protein-containing complex assembly [GO:0065003]; protein folding [GO:0006457]; urea metabolic process [GO:0019627]	nickel cation binding [GO:0016151]; unfolded protein binding [GO:0051082]	cytoplasm [GO:0005737]	IPR012406;IPR007864;IPR004029	UreE;UreE_C_dom;UreE_N
	RCAP_rcc01223	D5AS89	Urease accessory protein UreF	ureF	213	Unknown					nitrogen compound metabolic process [GO:0006807]	nickel cation binding [GO:0016151]	cytoplasm [GO:0005737]	IPR002639	UreF
	RCAP_rcc01224	D5AS90	Urease accessory protein UreG	ureG	208	Cytoplasmic	TIGR00101;	160	Central intermediary metabolism	Nitrogen metabolism	nitrogen compound metabolic process [GO:0006807]	GTPase activity [GO:0003924]; GTP binding [GO:0005525]; nickel cation binding [GO:0016151]	cytoplasm [GO:0005737]	IPR003495;IPR027417;IPR004400	CobW/HypB/UreG_dom;P-loop_NTPase;UreG
	RCAP_rcc01225	D5AS91	Uncharacterized protein	RCAP_rcc01225	45	Unknown
	RCAP_rcc01226	D5AS92	Urea ABC transporter, urea binding protein UrtB	urtB	433	Unknown	TIGR03407;	142	Transport and binding proteins	Amino acids, peptides and amines				IPR017777;IPR028082;IPR006311	ABC_transptr_urea_sub-bd_UrtA;Peripla_BP_I;TAT_signal	ko02010
	RCAP_rcc01227	D5AS93	Urea ABC transporter, permease protein UrtA	urtA	658	Cytoplasmic Membrane	TIGR03409;	142	Transport and binding proteins	Amino acids, peptides and amines		transmembrane transporter activity [GO:0022857]	integral component of membrane [GO:0016021]; plasma membrane [GO:0005886]	IPR001851;IPR017779	ABC_transp_permease;ABC_UrtB_bac	ko02010
	RCAP_rcc01228	D5AS94	Urea ABC transporter, permease protein UrtC	urtC	408	Cytoplasmic Membrane	TIGR03408;	142	Transport and binding proteins	Amino acids, peptides and amines		transmembrane transporter activity [GO:0022857]	integral component of membrane [GO:0016021]; plasma membrane [GO:0005886]	IPR001851;IPR017778	ABC_transp_permease;ABC_transptr_urea_perm_UrtC	ko02010
	RCAP_rcc01229	D5AS95	Urea ABC transporter, ATP-binding protein UrtD (EC 3.6.3.-)	urtD	246	Cytoplasmic Membrane	TIGR03411;	142	Transport and binding proteins	Amino acids, peptides and amines		ATPase activity [GO:0016887]; ATP binding [GO:0005524]		IPR003439;IPR017781;IPR027417	ABC_transporter-like;ABC_transptr_urea_ATP-bd_UrtD;P-loop_NTPase	ko02010
	RCAP_rcc01230	D5AS96	Urea ABC transporter, ATP-binding protein UrtE (EC 3.6.3.-)	urtE	231	Cytoplasmic	TIGR03410;	142	Transport and binding proteins	Amino acids, peptides and amines		ATPase activity [GO:0016887]; ATP binding [GO:0005524]		IPR003593;IPR003439;IPR017780;IPR027417	AAA+_ATPase;ABC_transporter-like;ABC_transptr_urea_ATP-bd_UrtE;P-loop_NTPase	ko02010
*	RCAP_rcc01231	D5AS97	Ubiquinone biosynthesis hydroxylase, UbiH/UbiF/VisC/COQ6 family	RCAP_rcc01231	404	Unknown	TIGR01988;	81	Biosynthesis of cofactors, prosthetic groups, and carriers	Menaquinone and ubiquinone	ubiquinone biosynthetic process [GO:0006744]	FAD binding [GO:0071949]; oxidoreductase activity, acting on paired donors, with incorporation or reduction of molecular oxygen, NAD(P)H as one donor, and incorporation of one atom of oxygen [GO:0016709]		IPR002938;IPR003042;IPR010971	mOase_FAD-bd;Rng_hydrolase-like;Ubi_Hdrxlases	ko00130
	RCAP_rcc01232	D5AS98	Membrane protein, putative	RCAP_rcc01232	60	Cytoplasmic Membrane							integral component of membrane [GO:0016021]
	RCAP_rcc01233	D5AS99	Membrane protein, putative	RCAP_rcc01233	60	Cytoplasmic Membrane							integral component of membrane [GO:0016021]
	RCAP_rcc01234	D5ASA0	Membrane protein, putative	RCAP_rcc01234	72	Cytoplasmic Membrane							integral component of membrane [GO:0016021]
*	RCAP_rcc01235	D5ASA1	Pyrimidine 5'-nucleotidase (EC 3.1.3.5)	RCAP_rcc01235	219	Cytoplasmic	TIGR01509;TIGR01993;	703	Unknown function	Enzymes of unknown specificity		5'-nucleotidase activity [GO:0008253]		IPR023214;IPR006439;IPR010237	HAD-like_dom;HAD-SF_hydro_IA;Pyr-5-nucltdase
*	RCAP_rcc01236	D5ASA2	Transcriptional regulator, GntR family	RCAP_rcc01236	211	Cytoplasmic						DNA binding [GO:0003677]; DNA-binding transcription factor activity [GO:0003700]		IPR011711;IPR008920;IPR000524;IPR011991	GntR_C;TF_FadR/GntR_C;Tscrpt_reg_HTH_GntR;WHTH_DNA-bd_dom
	RCAP_rcc01237	D5ASA3	Glycosyl transferase, family 2	RCAP_rcc01237	649	Cytoplasmic Membrane						transferase activity [GO:0016740]	integral component of membrane [GO:0016021]	IPR007831;IPR029044	GSPII_E_N;Nucleotide-diphossugar_trans
*	RCAP_rcc01238	D5ASA4	Carbamoyl-phosphate synthase small chain (EC 6.3.5.5) (Carbamoyl-phosphate synthetase glutamine chain)	carA	388	Cytoplasmic	TIGR01368;	126	Purines, pyrimidines, nucleosides, and nucleotides	Pyrimidine ribonucleotide biosynthesis	'de novo' pyrimidine nucleobase biosynthetic process [GO:0006207]; 'de novo' UMP biosynthetic process [GO:0044205]; arginine biosynthetic process [GO:0006526]; glutamine metabolic process [GO:0006541]	ATP binding [GO:0005524]; carbamoyl-phosphate synthase (glutamine-hydrolyzing) activity [GO:0004088]		IPR006274;IPR002474;IPR029062;IPR017926	CarbamoylP_synth_ssu;CarbamoylP_synth_ssu_N;Class_I_gatase-like;GATASE	ko00240;ko00250
*	RCAP_rcc01239	D5ASA5	Glyoxalase/bleomycin resistance protein/dioxygenase	RCAP_rcc01239	127	Unknown						dioxygenase activity [GO:0051213]		IPR029068;IPR025870	Glyas_Bleomycin-R_OHBP_Dase;Glyoxalase-like_dom
*	RCAP_rcc01240	P00094	Cytochrome c2	cycA	137	Periplasmic					photosynthesis [GO:0015979]	electron transfer activity [GO:0009055]; heme binding [GO:0020037]; metal ion binding [GO:0046872]		IPR009056	Cyt_c-like_dom	ko04115;ko04210;ko05010;ko05012;ko05014;ko05016;ko05145;ko05152;ko05200;ko05210;ko05222;ko05416
*	RCAP_rcc01241	D5ASA7	Octanoyltransferase (EC 2.3.1.181) (Lipoate-protein ligase B) (Lipoyl/octanoyl transferase) (Octanoyl-[acyl-carrier-protein]-protein N-octanoyltransferase)	lipB	220	Cytoplasmic	TIGR00214;	140	Protein fate	Protein modification and repair	protein lipoylation [GO:0009249]	lipoyl(octanoyl) transferase activity [GO:0033819]; octanoyl transferase activity (acting on glycine-cleavage complex H protein) [GO:0102555]	cytoplasm [GO:0005737]	IPR004143;IPR000544;IPR020605	BPL_LipA_LipB;Octanoyltransferase;Octanoyltransferase_CS	ko00785
	RCAP_rcc01242	D5ASA8	Hemolysin-type calcium-binding repeat family protein	RCAP_rcc01242	767	Extracellular						calcium ion binding [GO:0005509]		IPR028992;IPR018511;IPR001343;IPR011049	Hedgehog/Intein_dom;Hemolysin-typ_Ca-bd_CS;Hemolysn_Ca-bd;Serralysin-like_metalloprot_C
*	RCAP_rcc01243	D5ASA9	Spermidine/putrescine import ATP-binding protein PotA (EC 3.6.3.31)	potA1	367	Cytoplasmic Membrane	TIGR01187;	142	Transport and binding proteins	Amino acids, peptides and amines		ATP binding [GO:0005524]; polyamine-transporting ATPase activity [GO:0015417]	ATP-binding cassette (ABC) transporter complex [GO:0043190]	IPR003593;IPR003439;IPR017871;IPR008995;IPR027417;IPR005893;IPR013611	AAA+_ATPase;ABC_transporter-like;ABC_transporter_CS;Mo/tungstate-bd_C_term_dom;P-loop_NTPase;Sp_pt_ABC_ATP-bd;Transp-assoc_OB_typ2
*	RCAP_rcc01244	D5ASB0	Polyamine ABC transporter, periplasmic polyamine-binding protein PotD-1	potD1	357	Periplasmic
*	RCAP_rcc01245	D5ASB1	Polyamine ABC transporter, permease protein PotB-1	potB1	421	Cytoplasmic Membrane					transmembrane transport [GO:0055085]		integral component of membrane [GO:0016021]; plasma membrane [GO:0005886]	IPR000515	MetI-like
*	RCAP_rcc01246	D5ASB2	Polyamine ABC transporter, permease protein PotI-1	potI1	317	Cytoplasmic Membrane					transmembrane transport [GO:0055085]		integral component of membrane [GO:0016021]; plasma membrane [GO:0005886]	IPR000515	MetI-like
*	RCAP_rcc01247	D5ASB3	Membrane transport family protein	RCAP_rcc01247	316	Cytoplasmic Membrane					transmembrane transport [GO:0055085]		integral component of membrane [GO:0016021]	IPR004776	Auxin_eff
*	RCAP_rcc01248	D5ASB4	Metallo-beta-lactamase family protein	RCAP_rcc01248	266	Cytoplasmic								IPR001279	Beta-lactamas-like
*	RCAP_rcc01249	D5ASB5	TatD-related deoxyribonuclease family protein (EC 3.1.21.-)	RCAP_rcc01249	265	Cytoplasmic	TIGR00010;	703	Unknown function	Enzymes of unknown specificity		endodeoxyribonuclease activity, producing 5'-phosphomonoesters [GO:0016888]		IPR018228;IPR015991;IPR001130	DNase_TatD-rel_CS;DNase_TatD-type;TatD_family
*	RCAP_rcc01250	D5ASB6	DNA polymerase III, delta' subunit (EC 2.7.7.7)	holB	369	Cytoplasmic						DNA-directed DNA polymerase activity [GO:0003887]		IPR003593;IPR027417	AAA+_ATPase;P-loop_NTPase	ko00230;ko00240;ko03030;ko03430;ko03440
*	RCAP_rcc01251	D5ASB7	Thymidylate kinase (EC 2.7.4.9) (dTMP kinase)	tmk	206	Cytoplasmic	TIGR00041;	124	Purines, pyrimidines, nucleosides, and nucleotides	Nucleotide and nucleoside interconversions	dTDP biosynthetic process [GO:0006233]; dTTP biosynthetic process [GO:0006235]	ATP binding [GO:0005524]; thymidylate kinase activity [GO:0004798]		IPR027417;IPR018094	P-loop_NTPase;Thymidylate_kinase	ko00240
*	RCAP_rcc01252	D5ASB8	D-alanyl-D-alanine carboxypeptidase-2 (EC 3.4.16.4)	dacC2	386	Cytoplasmic Membrane						serine-type D-Ala-D-Ala carboxypeptidase activity [GO:0009002]		IPR012338;IPR018044;IPR012907;IPR001967	Beta-lactam/transpept-like;Peptidase_S11;Peptidase_S11_C;Peptidase_S11_N	ko00550
*	RCAP_rcc01253	D5ASB9	Sporulation domain protein	RCAP_rcc01253	304	Cytoplasmic						peptidoglycan binding [GO:0042834]		IPR007730	Sporulation-related_dom
*	RCAP_rcc01254	D5ASC0	Phage integrase	RCAP_rcc01254	432	Cytoplasmic					DNA integration [GO:0015074]; DNA recombination [GO:0006310]	DNA binding [GO:0003677]		IPR011010;IPR013762;IPR002104	DNA_brk_join_enz;Integrase-like_cat-core;Integrase_catalytic
	RCAP_rcc01255	D5ASC1	Uncharacterized protein	RCAP_rcc01255	69	Unknown
	RCAP_rcc01256	D5ASC2	Uncharacterized protein	RCAP_rcc01256	112	Unknown
	RCAP_rcc01257	D5ASC3	Uncharacterized protein	RCAP_rcc01257	58	Unknown
	RCAP_rcc01258	D5ASC4	Uncharacterized protein	RCAP_rcc01258	923	Unknown
	RCAP_rcc01259	D5ASC5	Uncharacterized protein	RCAP_rcc01259	361	Cytoplasmic
*	RCAP_rcc01260	D5ASC6	Type III restriction-modification system RcaSBIIP, Mod subunit (EC 2.1.1.72)	mod	597	Cytoplasmic						DNA binding [GO:0003677]; N-methyltransferase activity [GO:0008170]; site-specific DNA-methyltransferase (adenine-specific) activity [GO:0009007]		IPR002295;IPR002941;IPR002052;IPR029063	D21N6_MeTrfase;DNA_methylase_N4/N6;DNA_methylase_N6_adenine_CS;SAM-dependent_MTases
*	RCAP_rcc01261	D5ASC7	Type III restriction-modification system RcaSBIIP, Res subunit (EC 3.1.21.5)	res	869	Cytoplasmic						ATP binding [GO:0005524]; DNA binding [GO:0003677]; type III site-specific deoxyribonuclease activity [GO:0015668]		IPR006935;IPR027417	Helicase/UvrB_dom;P-loop_NTPase
*	RCAP_rcc01262	D5ASC8	Recombinase	RCAP_rcc01262	211	Cytoplasmic						DNA binding [GO:0003677]; recombinase activity [GO:0000150]		IPR009057;IPR006118;IPR006119	Homeodomain-like;Recombinase_CS;Resolv_N
*	RCAP_rcc01263	D5ASC9	Membrane protein, putative	RCAP_rcc01263	216	Cytoplasmic Membrane							integral component of membrane [GO:0016021]
*	RCAP_rcc01264	D5ASD0	Reverse transcriptase family protein (EC 2.7.7.49)	RCAP_rcc01264	447	Cytoplasmic						RNA-directed DNA polymerase activity [GO:0003964]		IPR000477	RT_dom
	RCAP_rcc01267	D5ASD1	Uncharacterized protein	RCAP_rcc01267	108	Unknown
	RCAP_rcc01268	D5ASD2	Uncharacterized protein	RCAP_rcc01268	133	Unknown
	RCAP_rcc01269	D5ASD3	Conserved domain protein	RCAP_rcc01269	103	Unknown
*	RCAP_rcc01270	D5ASD4	Transcriptional regulator, XRE family	RCAP_rcc01270	85	Cytoplasmic						sequence-specific DNA binding [GO:0043565]		IPR001387;IPR010982	Cro/C1-type_HTH;Lambda_DNA-bd_dom
*	RCAP_rcc01271	D5ASD5	Uncharacterized protein	RCAP_rcc01271	600	Cytoplasmic Membrane							integral component of membrane [GO:0016021]
*	RCAP_rcc01272	D5ASD6	Uncharacterized protein	RCAP_rcc01272	488	Cytoplasmic
*	RCAP_rcc01273	D5ASD7	Uncharacterized protein	RCAP_rcc01273	548	Unknown
*	RCAP_rcc01274	D5ASD8	CRISPR-associated protein, RAMP family	RCAP_rcc01274	875	Unknown								IPR005537	RAMP_fam
	RCAP_rcc01275	D5ASD9	CRISPR-associated endoribonuclease Cas2 (EC 3.1.-.-)	cas2	96	Unknown	TIGR01573;	719	Signal transduction	Other	defense response to virus [GO:0051607]; maintenance of CRISPR repeat elements [GO:0043571]	endoribonuclease activity [GO:0004521]; metal ion binding [GO:0046872]		IPR021127;IPR000640;IPR019199	CRISPR_associated_Cas2;EFG_V;Virulence_VapD/CRISPR_Cas2
	RCAP_rcc01276	D5ASE0	CRISPR-associated endonuclease Cas1 (EC 3.1.-.-)	cas1	533	Cytoplasmic	TIGR00287;	719	Signal transduction	Other	defense response to virus [GO:0051607]; maintenance of CRISPR repeat elements [GO:0043571]	DNA binding [GO:0003677]; endonuclease activity [GO:0004519]; metal ion binding [GO:0046872]; RNA-directed DNA polymerase activity [GO:0003964]		IPR002729;IPR000477	CRISPR-assoc_Cas1;RT_dom
	RCAP_rcc01277	D5ASE1	RNA-directed DNA polymerase (EC 2.7.7.49)	RCAP_rcc01277	176	Periplasmic						RNA-directed DNA polymerase activity [GO:0003964]
*	RCAP_rcc01278	D5ASE2	Conserved domain protein	RCAP_rcc01278	302	Unknown								IPR019267	CRISPR-assoc_Cas6_dom
	RCAP_rcc01279	D5ASE3	Uncharacterized protein	RCAP_rcc01279	214	Cytoplasmic								IPR021139;IPR029060	NYN_limkain-b1;PIN_domain-like
*	RCAP_rcc01280	D5ASE4	Exonuclease family protein	RCAP_rcc01280	156	Cytoplasmic						exonuclease activity [GO:0004527]; nucleic acid binding [GO:0003676]		IPR012337	RNaseH-like_dom
	RCAP_rcc01281	D5ASE5	Membrane protein, putative	RCAP_rcc01281	70	Cytoplasmic Membrane							integral component of membrane [GO:0016021]
	RCAP_rcc01282	D5ASE6	Relaxase/mobilization nuclease domain protein	RCAP_rcc01282	706	Cytoplasmic								IPR005094	Endonuclease_MobA/VirD2
	RCAP_rcc01283	D5ASE7	Uncharacterized protein	RCAP_rcc01283	97	Unknown
	RCAP_rcc01284	D5ASE8	Conserved domain protein	RCAP_rcc01284	155	Unknown
*	RCAP_rcc01285	D5ASE9	Transcriptional regulator, GntR family	RCAP_rcc01285	327	Cytoplasmic								IPR026881	WYL_dom
*	RCAP_rcc01286	D5ASF0	McrBC restriction endonuclease system, McrB subunit (EC 3.1.21.-)	mcrB	808	Cytoplasmic						ATPase activity [GO:0016887]; ATP binding [GO:0005524]; endonuclease activity [GO:0004519]		IPR003593;IPR011704;IPR027417	AAA+_ATPase;ATPase_dyneun-rel_AAA;P-loop_NTPase
	RCAP_rcc01287	D5ASF1	McrBC restriction endonuclease system, McrC subunit	mcrC	435	Cytoplasmic						endonuclease activity [GO:0004519]		IPR019292	Restrct_system_McrC
	RCAP_rcc01288	D5ASF2	Uncharacterized protein	RCAP_rcc01288	240	Cytoplasmic
	RCAP_rcc01289	D5ASF3	Uncharacterized protein	RCAP_rcc01289	871	Cytoplasmic					DNA repair [GO:0006281]	ATP binding [GO:0005524]; exonuclease activity [GO:0004527]		IPR027417	P-loop_NTPase
	RCAP_rcc01290	D5ASF4	UvrD/REP helicase family protein (EC 3.6.1.-)	RCAP_rcc01290	1049	Cytoplasmic					DNA repair [GO:0006281]	ATP binding [GO:0005524]; ATP-dependent DNA helicase activity [GO:0004003]; DNA binding [GO:0003677]; exodeoxyribonuclease V activity [GO:0008854]		IPR014017;IPR000212;IPR027417;IPR014016	DNA_helicase_UvrD-like_C;DNA_helicase_UvrD/REP;P-loop_NTPase;UvrD-like_ATP-bd
*	RCAP_rcc01291	D5ASF5	Kinetochore Spc7 domain protein	RCAP_rcc01291	681	Unknown							integral component of membrane [GO:0016021]
*	RCAP_rcc01292	D5ASF6	OmpA/MotB domain protein	RCAP_rcc01292	334	Cytoplasmic							integral component of membrane [GO:0016021]	IPR006665	OmpA/MotB_C
	RCAP_rcc01293	D5ASF7	Uncharacterized protein	RCAP_rcc01293	444	Cytoplasmic								IPR028943	EH_Signature_dom
*	RCAP_rcc01294	D5ASF8	Helicase, SNF2 family (EC 3.6.1.-)	RCAP_rcc01294	1030	Cytoplasmic						ATP binding [GO:0005524]; helicase activity [GO:0004386]		IPR014001;IPR001650;IPR027417;IPR000330	Helicase_ATP-bd;Helicase_C;P-loop_NTPase;SNF2_N
	RCAP_rcc01298	D5ASF9	Helicase, SNF2 family (EC 3.6.1.-)	RCAP_rcc01298	412	Cytoplasmic						ATP binding [GO:0005524]; helicase activity [GO:0004386]		IPR001650;IPR027417;IPR000330	Helicase_C;P-loop_NTPase;SNF2_N
	RCAP_rcc01299	D5ASG0	Uncharacterized protein	RCAP_rcc01299	208	Unknown
*	RCAP_rcc01300	D5ASG1	CRISPR-associated helicase, Cas3 family (EC 3.6.1.-)	RCAP_rcc01300	754	Cytoplasmic	TIGR01596;	719	Signal transduction	Other		ATP binding [GO:0005524]; hydrolase activity [GO:0016787]; nucleic acid binding [GO:0003676]		IPR006483;IPR011545;IPR003607;IPR014001;IPR027417	CRISPR-assoc_Cas3_HD;DEAD/DEAH_box_helicase_dom;HD/PDEase_dom;Helicase_ATP-bd;P-loop_NTPase
*	RCAP_rcc01301	D5ASG2	CRISPR-associated protein, Cas5 family, Dvulg subtype	RCAP_rcc01301	232	Cytoplasmic	TIGR01876;TIGR02593;	719	Signal transduction	Other	defense response to virus [GO:0051607]; maintenance of CRISPR repeat elements [GO:0043571]	endonuclease activity [GO:0004519]		IPR021124;IPR013422;IPR010155	CRISPR-assoc_prot_Cas5;CRISPR-assoc_prot_Cas5_N;CRISPR-assoc_prot_Cas5d-typ
*	RCAP_rcc01302	D5ASG3	CRISPR-associated protein, Csd1 family	RCAP_rcc01302	579	Unknown	TIGR01863;	719	Signal transduction	Other				IPR010144	CRISPR-assoc_prot_Csd1-typ
*	RCAP_rcc01303	D5ASG4	CRISPR-associated protein, Cas2 family	RCAP_rcc01303	316	Cytoplasmic	TIGR02589;TIGR01595;	719	Signal transduction	Other				IPR013418;IPR006482	CRISPR-assoc_prot_Csd2;CRISPR-assoc_prot_TM1801
	RCAP_rcc01304	D5ASG5	CRISPR-associated exonuclease Cas4 (EC 3.1.12.1)	RCAP_rcc01304	216	Cytoplasmic	TIGR00372;	719	Signal transduction	Other	defense response to virus [GO:0051607]	exonuclease activity [GO:0004527]; iron-sulfur cluster binding [GO:0051536]; metal ion binding [GO:0046872]		IPR013343;IPR022765	CRISPR-assoc_prot_Cas4;Dna2/Cas4_DUF83
	RCAP_rcc01305	D5ASG6	CRISPR-associated endonuclease Cas1 (EC 3.1.-.-)	cas1	344	Unknown	TIGR00287;TIGR03640;	719	Signal transduction	Other	defense response to virus [GO:0051607]; maintenance of CRISPR repeat elements [GO:0043571]	DNA binding [GO:0003677]; endodeoxyribonuclease activity [GO:0004520]; metal ion binding [GO:0046872]	integral component of membrane [GO:0016021]	IPR002729;IPR019856	CRISPR-assoc_Cas1;CRISPR-assoc_Cas1_DVULG
	RCAP_rcc01306	D5ASG7	CRISPR-associated endoribonuclease Cas2 (EC 3.1.-.-)	cas2	96	Cytoplasmic	TIGR01573;	719	Signal transduction	Other	defense response to virus [GO:0051607]; maintenance of CRISPR repeat elements [GO:0043571]	endoribonuclease activity [GO:0004521]; metal ion binding [GO:0046872]		IPR021127;IPR000640;IPR019199	CRISPR_associated_Cas2;EFG_V;Virulence_VapD/CRISPR_Cas2
	RCAP_rcc01307	D5ASG8	Uncharacterized protein	RCAP_rcc01307	525	Extracellular
	RCAP_rcc01309	D5ASG9	Transposase, IS66 family	RCAP_rcc01309	299	Unknown
	RCAP_rcc01310	D5ASH0	Uncharacterized protein	RCAP_rcc01310	75	Unknown
	RCAP_rcc01311	D5ASH1	Uncharacterized protein	RCAP_rcc01311	79	Unknown								IPR003738	DUF159
*	RCAP_rcc01312	D5ASH2	Uncharacterized protein	RCAP_rcc01312	199	Cytoplasmic
	RCAP_rcc01313	D5ASH3	Uncharacterized protein	RCAP_rcc01313	278	Cytoplasmic
*	RCAP_rcc01314	D5ASH4	Uncharacterized protein	RCAP_rcc01314	395	Cytoplasmic								IPR004919	DUF262
*	RCAP_rcc01315	D5ASH5	Uncharacterized protein	RCAP_rcc01315	372	Cytoplasmic						ATP binding [GO:0005524]		IPR003593;IPR003959;IPR022532;IPR027417	AAA+_ATPase;ATPase_AAA_core;DUF3696;P-loop_NTPase
*	RCAP_rcc01316	D5ASH6	Uncharacterized protein	RCAP_rcc01316	304	Cytoplasmic
	RCAP_rcc01317	D5ASH7	Pirin domain protein	RCAP_rcc01317	302	Cytoplasmic								IPR012093;IPR008778;IPR003829;IPR014710;IPR011051	Pirin;Pirin_C_dom;Pirin_N_dom;RmlC-like_jellyroll;RmlC_Cupin
	RCAP_rcc01318	D5ASH8	Outer membrane autotransporter barrel domain protein	RCAP_rcc01318	1565	Unknown
	RCAP_rcc01319	D5ASH9	Membrane protein, putative	RCAP_rcc01319	416	Cytoplasmic Membrane							integral component of membrane [GO:0016021]	IPR025105;IPR003416	DUF4010;MgtCSapBSrpB_transpt
*	RCAP_rcc01320	D5ASI0	Uncharacterized protein	RCAP_rcc01320	404	Unknown								IPR025330	DUF4236
	RCAP_rcc01321	D5ASI1	Acetyltransferase, GNAT family	RCAP_rcc01321	201	Cytoplasmic						transferase activity [GO:0016740]		IPR016181;IPR000182	Acyl_CoA_acyltransferase;GNAT_dom
	RCAP_rcc01323	D5ASI2	Transposase, IS66 family	RCAP_rcc01323	547	Cytoplasmic								IPR004291	Transposase_25
*	RCAP_rcc01324	D5ASI3	Type I restriction-modification system RcaSBIIIP, R subunit (EC 3.1.21.3)	hsdR2	817	Cytoplasmic					DNA modification [GO:0006304]	ATP binding [GO:0005524]; DNA binding [GO:0003677]; type I site-specific deoxyribonuclease activity [GO:0009035]		IPR013670;IPR006935;IPR014001;IPR001650;IPR029464;IPR027417	EcoEI_R_C_dom;Helicase/UvrB_dom;Helicase_ATP-bd;Helicase_C;HSDR_N;P-loop_NTPase
*	RCAP_rcc01325	D5ASI4	Type I restriction-modification system RcaSBIIIP, M subunit (EC 2.1.1.72)	hsdM2	481	Cytoplasmic						DNA binding [GO:0003677]; N-methyltransferase activity [GO:0008170]; site-specific DNA-methyltransferase (adenine-specific) activity [GO:0009007]		IPR022749;IPR003356;IPR002052;IPR029063	D12N6_MeTrfase_N;DNA_methylase_A-5;DNA_methylase_N6_adenine_CS;SAM-dependent_MTases
*	RCAP_rcc01326	D5ASI5	Type I restriction-modification system RcaSBIIIP, S subunit	hsdS2	560	Cytoplasmic					DNA modification [GO:0006304]	DNA binding [GO:0003677]		IPR000055	Restrct_endonuc_typeI_HsdS
*	RCAP_rcc01327	D5ASI6	Uncharacterized protein	RCAP_rcc01327	312	Unknown
*	RCAP_rcc01328	D5ASI7	Uncharacterized protein	RCAP_rcc01328	555	Unknown								IPR003959;IPR022532;IPR027417	ATPase_AAA_core;DUF3696;P-loop_NTPase
	RCAP_rcc01329	D5ASI8	Uncharacterized protein	RCAP_rcc01329	311	Cytoplasmic
	RCAP_rcc01330	D5ASI9	Conserved domain protein	RCAP_rcc01330	79	Unknown
	RCAP_rcc01333	D5ASJ0	Transposase, IS66 family	RCAP_rcc01333	116	Unknown								IPR008878	Transposase_IS66_Orf2
	RCAP_rcc01334	D5ASJ1	Uncharacterized protein	RCAP_rcc01334	144	Cytoplasmic					transposition, DNA-mediated [GO:0006313]	DNA binding [GO:0003677]; transposase activity [GO:0004803]		IPR002514	Transposase_8
	RCAP_rcc01335	D5ASJ2	GAF modulated sigma54 specific transcriptional regulator, Fis family	RCAP_rcc01335	597	Cytoplasmic					regulation of transcription, DNA-templated [GO:0006355]	ATP binding [GO:0005524]; sequence-specific DNA binding [GO:0043565]; transcription factor binding [GO:0008134]		IPR003593;IPR009057;IPR002197;IPR027417;IPR002078;IPR025662	AAA+_ATPase;Homeodomain-like;HTH_Fis;P-loop_NTPase;Sigma_54_int;Sigma_54_int_dom_ATP-bd_1
	RCAP_rcc01336	D5ASJ3	Acetone carboxylase, beta subunit (EC 3.5.2.9)	acxA	717	Cytoplasmic						5-oxoprolinase (ATP-hydrolyzing) activity [GO:0017168]		IPR008040;IPR002821	Hydant_A_N;Hydantoinase_A	ko00330
	RCAP_rcc01337	D5ASJ4	Acetone carboxylase, alpha subunit (EC 6.4.1.6)	acxB	769	Cytoplasmic						acetone carboxylase activity [GO:0018710]		IPR003692	Hydantoinase_B
	RCAP_rcc01338	D5ASJ5	Acetone carboxylase, gamma subunit (EC 6.4.1.6)	acxC	167	Cytoplasmic						acetone carboxylase activity [GO:0018710]		IPR016750	Aceto_COase_bsu/gsu
	RCAP_rcc01339	D5ASJ6	Uncharacterized protein	RCAP_rcc01339	73	Unknown
	RCAP_rcc01340	D5ASJ7	Transcriptional regulator, LysR family	RCAP_rcc01340	288	Cytoplasmic						DNA binding [GO:0003677]; DNA-binding transcription factor activity [GO:0003700]		IPR005119;IPR000847;IPR011991	LysR_subst-bd;Tscrpt_reg_HTH_LysR;WHTH_DNA-bd_dom
	RCAP_rcc01341	D5ASJ8	Uncharacterized protein	RCAP_rcc01341	303	Cytoplasmic Membrane							integral component of membrane [GO:0016021]	IPR000620	EamA_dom
*	RCAP_rcc01342	D5ASJ9	Iron siderophore/cobalamin ABC transporter, periplasmic iron siderophore/cobalamin-binding protein		344	Unknown								IPR002491	ABC_transptr_periplasmic_BD	ko02010
	RCAP_rcc01343	D5ASK0	Iron siderophore/cobalamin ABC transporter, permease protein	RCAP_rcc01343	194	Cytoplasmic Membrane						transporter activity [GO:0005215]	integral component of membrane [GO:0016021]; plasma membrane [GO:0005886]	IPR029022;IPR000522	ABC_BtuC-like;ABC_transptr_permAse
	RCAP_rcc01345	D5ASK1	Uncharacterized protein	RCAP_rcc01345	102	Cytoplasmic Membrane					maintenance of CRISPR repeat elements [GO:0043571]			IPR021124	CRISPR-assoc_prot_Cas5
	RCAP_rcc01347	D5ASK2	Pirin domain protein	RCAP_rcc01347	302	Cytoplasmic								IPR012093;IPR008778;IPR003829;IPR014710;IPR011051	Pirin;Pirin_C_dom;Pirin_N_dom;RmlC-like_jellyroll;RmlC_Cupin
*	RCAP_rcc01348	D5ASK3	Exonuclease family protein	RCAP_rcc01348	200	Cytoplasmic						exonuclease activity [GO:0004527]; nucleic acid binding [GO:0003676]		IPR006055;IPR013520;IPR012337	Exonuclease;Exonuclease_RNaseT/DNA_pol3;RNaseH-like_dom	ko00230;ko00240;ko03030;ko03430;ko03440
*	RCAP_rcc01349	D5ASK4	Pirin domain protein	RCAP_rcc01349	316	Unknown								IPR012093;IPR008778;IPR003829;IPR014710;IPR011051	Pirin;Pirin_C_dom;Pirin_N_dom;RmlC-like_jellyroll;RmlC_Cupin
*	RCAP_rcc01350	D5ASK5	Uncharacterized protein	RCAP_rcc01350	542	Cytoplasmic
*	RCAP_rcc01351	D5ASK6	Uncharacterized protein	RCAP_rcc01351	95	Unknown
*	RCAP_rcc01352	D5ASK7	Chemotaxis protein CheY-1	cheY1	121	Cytoplasmic					phosphorelay signal transduction system [GO:0000160]			IPR011006;IPR001789	CheY-like_superfamily;Sig_transdc_resp-reg_receiver	ko02020;ko02030
*	RCAP_rcc01353	D5ASK8	Chemotaxis protein CheA-1 (EC 2.7.13.3)	cheA1	663	Cytoplasmic					chemotaxis [GO:0006935]	ATP binding [GO:0005524]; phosphorelay sensor kinase activity [GO:0000155]	cytoplasm [GO:0005737]	IPR004105;IPR002545;IPR003594;IPR004358;IPR008207;IPR005467;IPR009082	CheA-like_dim;CheW;HATPase_C;Sig_transdc_His_kin-like_C;Sig_transdc_His_kin_Hpt_dom;Sig_transdc_His_kinase_core;Sig_transdc_His_kinase_dimeric	ko02020;ko02030
*	RCAP_rcc01354	D5ASK9	Chemotaxis protein CheW-1	cheW1	160	Cytoplasmic					chemotaxis [GO:0006935]; signal transduction [GO:0007165]			IPR002545	CheW	ko02020;ko02030
*	RCAP_rcc01355	D5ASL0	Methyl-accepting chemotaxis sensory transducer	RCAP_rcc01355	730	Cytoplasmic Membrane					chemotaxis [GO:0006935]; signal transduction [GO:0007165]	transmembrane signaling receptor activity [GO:0004888]	integral component of membrane [GO:0016021]	IPR024478;IPR004090;IPR003660;IPR004089	4HB_MCP;Chemotax_Me-accpt_rcpt;HAMP_linker_domain;MCPsignal_dom	ko02020;ko02030
*	RCAP_rcc01356	D5ASL1	CheW-like domain protein	RCAP_rcc01356	178	Cytoplasmic					chemotaxis [GO:0006935]; signal transduction [GO:0007165]			IPR002545	CheW	ko02020;ko02030
*	RCAP_rcc01357	D5ASL2	Chemotaxis protein methyltransferase CheR-2 (EC 2.1.1.80)	cheR2	296	Cytoplasmic						protein-glutamate O-methyltransferase activity [GO:0008983]		IPR022642;IPR000780;IPR022641;IPR029063	CheR_C;CheR_MeTrfase;CheR_N;SAM-dependent_MTases	ko02020;ko02030
*	RCAP_rcc01358	D5ASL3	Protein-glutamate methylesterase/protein-glutamine glutaminase (EC 3.1.1.61) (EC 3.5.1.44)	cheB	368	Cytoplasmic					chemotaxis [GO:0006935]; protein deamination [GO:0018277]; protein demethylation [GO:0006482]	phosphorelay response regulator activity [GO:0000156]; protein-glutamate methylesterase activity [GO:0008984]; protein-glutamine glutaminase activity [GO:0050568]	cytoplasm [GO:0005737]	IPR011006;IPR008248;IPR000673;IPR001789	CheY-like_superfamily;Sig_transdc_resp-reg_CheB;Sig_transdc_resp-reg_Me-estase;Sig_transdc_resp-reg_receiver	ko02020;ko02030
*	RCAP_rcc01359	D5ASL4	Uncharacterized protein	RCAP_rcc01359	201	Unknown								IPR006860;IPR006311	FecR;TAT_signal
	RCAP_rcc01360	D5ASL5	Adenylate/guanylate cyclase/CHASE2 sensor domain protein (EC 4.6.1.-)	RCAP_rcc01360	583	Cytoplasmic Membrane					cyclic nucleotide biosynthetic process [GO:0009190]; intracellular signal transduction [GO:0035556]	phosphorus-oxygen lyase activity [GO:0016849]	integral component of membrane [GO:0016021]	IPR001054;IPR007890;IPR029787	A/G_cyclase;CHASE2;Nucleotide_cyclase
*	RCAP_rcc01361	D5AT00	Transcriptional regulator, Crp/Fnr family	RCAP_rcc01361	233	Unknown					regulation of transcription, DNA-templated [GO:0006355]	DNA binding [GO:0003677]		IPR018490;IPR018488;IPR000595;IPR012318;IPR014710;IPR011991	cNMP-bd-like;cNMP-bd_CS;cNMP-bd_dom;HTH_CRP_2;RmlC-like_jellyroll;WHTH_DNA-bd_dom
	RCAP_rcc01362	D5AT01	Hemolysin-type calcium-binding repeat family protein	RCAP_rcc01362	607	Extracellular						calcium ion binding [GO:0005509]		IPR018511;IPR001343;IPR011049	Hemolysin-typ_Ca-bd_CS;Hemolysn_Ca-bd;Serralysin-like_metalloprot_C
*	RCAP_rcc01363	D5AT02	2-isopropylmalate synthase (EC 2.3.3.13) (Alpha-IPM synthase) (Alpha-isopropylmalate synthase)	leuA	519	Cytoplasmic	TIGR00973;	74	Amino acid biosynthesis	Pyruvate family	leucine biosynthetic process [GO:0009098]	2-isopropylmalate synthase activity [GO:0003852]		IPR013709;IPR002034;IPR013785;IPR005671;IPR000891	2-isopropylmalate_synth_dimer;AIPM/Hcit_synth_CS;Aldolase_TIM;LeuA_bact_synth;PYR_CT	ko00290;ko00620
*	RCAP_rcc01364	D5AT03	Signal transduction histidine kinase (EC 2.7.13.3)	RCAP_rcc01364	488	Cytoplasmic Membrane						ATP binding [GO:0005524]; phosphorelay sensor kinase activity [GO:0000155]	integral component of membrane [GO:0016021]	IPR003661;IPR003594;IPR004358;IPR005467;IPR009082	EnvZ-like_dim/P;HATPase_C;Sig_transdc_His_kin-like_C;Sig_transdc_His_kinase_core;Sig_transdc_His_kinase_dimeric
*	RCAP_rcc01365	D5AT04	MORN repeat family protein	RCAP_rcc01365	490	Unknown								IPR003409	MORN
*	RCAP_rcc01366	D5AT05	Glutamine-dependent NAD(+) synthetase (EC 6.3.5.1) (NAD(+) synthase [glutamine-hydrolyzing])	nadE	552	Cytoplasmic	TIGR00552;	163	Biosynthesis of cofactors, prosthetic groups, and carriers	Pyridine nucleotides	NAD biosynthetic process [GO:0009435]	ATP binding [GO:0005524]; NAD+ synthase (glutamine-hydrolyzing) activity [GO:0003952]; NAD+ synthase activity [GO:0008795]		IPR003010;IPR014445;IPR022310;IPR003694;IPR014729	C-N_Hydrolase;Gln-dep_NAD_synthase;NAD/GMP_synthase;NAD_synthase;Rossmann-like_a/b/a_fold	ko00760;ko00910
	RCAP_rcc01367	D5AT06	Uncharacterized protein	RCAP_rcc01367	154	Unknown					transposition, DNA-mediated [GO:0006313]	DNA binding [GO:0003677]; transposase activity [GO:0004803]		IPR002686	Transposase_17
*	RCAP_rcc01368	D5AT07	Antibiotic biosynthesis monooxygenase	RCAP_rcc01368	105	Unknown						monooxygenase activity [GO:0004497]		IPR007138;IPR011008	ABM-like;Dimeric_a/b-barrel
*	RCAP_rcc01369	D5AT08	ABC transporter, periplasmic substrate-binding protein	RCAP_rcc01369	365	Unknown
	RCAP_rcc01370	D5AT09	ABC transporter, permease protein	RCAP_rcc01370	293	Cytoplasmic Membrane					transmembrane transport [GO:0055085]		integral component of membrane [GO:0016021]; plasma membrane [GO:0005886]	IPR000515	MetI-like
*	RCAP_rcc01371	D5AT10	ABC transporter, permease protein	RCAP_rcc01371	260	Cytoplasmic Membrane					transmembrane transport [GO:0055085]		integral component of membrane [GO:0016021]	IPR000515	MetI-like
*	RCAP_rcc01372	D5AT11	ABC transporter, ATP-binding protein (EC 3.6.3.-)	RCAP_rcc01372	348	Cytoplasmic Membrane						ATPase activity [GO:0016887]; ATP binding [GO:0005524]; transmembrane transporter activity [GO:0022857]	ATP-binding cassette (ABC) transporter complex [GO:0043190]	IPR003593;IPR003439;IPR017871;IPR008995;IPR027417;IPR013611	AAA+_ATPase;ABC_transporter-like;ABC_transporter_CS;Mo/tungstate-bd_C_term_dom;P-loop_NTPase;Transp-assoc_OB_typ2
	RCAP_rcc01373	D5AT12	Transcriptional regulator, RpiR family	RCAP_rcc01373	290	Cytoplasmic					carbohydrate derivative metabolic process [GO:1901135]	carbohydrate derivative binding [GO:0097367]; DNA binding [GO:0003677]; DNA-binding transcription factor activity [GO:0003700]		IPR009057;IPR000281;IPR001347;IPR011991	Homeodomain-like;HTH_RpiR;SIS;WHTH_DNA-bd_dom
	RCAP_rcc01374	D5AT13	Tripartite ATP-independent periplasmic transporter, DctQ-1 component	dctQ1	168	Cytoplasmic Membrane							integral component of membrane [GO:0016021]	IPR007387	DctQ_transporter
	RCAP_rcc01375	D5AT14	TRAP C4-dicarboxylate transport system permease, DctM-1 subunit	dctM1	441	Cytoplasmic Membrane							integral component of membrane [GO:0016021]	IPR010656;IPR004681	DctM;TRAP_transpt_permease
*	RCAP_rcc01376	D5AT15	TRAP dicarboxylate transporter, DctP-1 subunit	dctP1	344	Unknown					transmembrane transport [GO:0055085]			IPR018389;IPR006311	Extracellular_bind_fam7;TAT_signal
*	RCAP_rcc01377	D5AT16	Glutamine synthetase-2 (EC 6.3.1.2)	glnA2	454	Cytoplasmic					glutamine biosynthetic process [GO:0006542]	glutamate-ammonia ligase activity [GO:0004356]		IPR008147;IPR014746;IPR008146	Gln_synt_beta;Gln_synth/guanido_kin_cat_dom;Gln_synth_cat_dom	ko00250;ko00330;ko00910;ko02020
*	RCAP_rcc01378	D5AT17	Aldehyde dehydrogenase family protein (EC 1.2.1.-)	RCAP_rcc01378	462	Cytoplasmic						oxidoreductase activity, acting on the aldehyde or oxo group of donors, NAD or NADP as acceptor [GO:0016620]		IPR016161;IPR016163;IPR029510;IPR016162;IPR015590	Ald_DH/histidinol_DH;Ald_DH_C;Ald_DH_CS_GLU;Ald_DH_N;Aldehyde_DH_dom
*	RCAP_rcc01379	D5AT18	Iron-containing alcohol dehydrogenase (EC 1.1.1.-)	RCAP_rcc01379	384	Cytoplasmic						metal ion binding [GO:0046872]; oxidoreductase activity [GO:0016491]		IPR001670;IPR018211	ADH_Fe;ADH_Fe_CS
*	RCAP_rcc01380	D5AT19	Uncharacterized protein	RCAP_rcc01380	731	Unknown								IPR010344	DUF940
*	RCAP_rcc01381	D5AT20	Lipoprotein, putative	RCAP_rcc01381	229	Unknown								IPR021308;IPR023373	GfcB;YmcC_dom
	RCAP_rcc01382	D5AT21	Membrane protein, putative	RCAP_rcc01382	61	Cytoplasmic Membrane							integral component of membrane [GO:0016021]
*	RCAP_rcc01383	D5AT22	UDP-glucose 6-dehydrogenase (EC 1.1.1.22)	ugd	434	Cytoplasmic	TIGR03026;	91	Cell envelope	Surface structures	polysaccharide biosynthetic process [GO:0000271]	NAD binding [GO:0051287]; UDP-glucose 6-dehydrogenase activity [GO:0003979]		IPR008927;IPR016040;IPR017476;IPR014027;IPR014026;IPR001732;IPR028357	6-PGluconate_DH_C-like;NAD(P)-bd_dom;UDP-Glc/GDP-Man;UDP-Glc/GDP-Man_DH_C;UDP-Glc/GDP-Man_DH_dimer;UDP-Glc/GDP-Man_DH_N;UDPglc_DH_bac	ko00040;ko00053;ko00500;ko00520
*	RCAP_rcc01384	D5AT23	UvrABC system protein B (Protein UvrB) (Excinuclease ABC subunit B)	uvrB	727	Cytoplasmic	TIGR00631;	132	DNA metabolism	DNA replication, recombination, and repair	nucleotide-excision repair [GO:0006289]; SOS response [GO:0009432]	ATPase activity [GO:0016887]; ATP binding [GO:0005524]; DNA binding [GO:0003677]; excinuclease ABC activity [GO:0009381]	cytoplasm [GO:0005737]; excinuclease repair complex [GO:0009380]	IPR006935;IPR014001;IPR001650;IPR027417;IPR001943;IPR004807;IPR024759	Helicase/UvrB_dom;Helicase_ATP-bd;Helicase_C;P-loop_NTPase;UVR_dom;UvrB;UvrB_YAD/RRR_dom	ko03420
*	RCAP_rcc01385	D5AT24	NADH ubiquinone oxidoreductase subunit, NDUFA4 family (EC 1.6.5.3)	RCAP_rcc01385	103	Unknown					electron transport chain [GO:0022900]	NADH dehydrogenase (ubiquinone) activity [GO:0008137]		IPR006885	NADH_UbQ_FeS_4_mit
	RCAP_rcc01386	D5AT25	Uncharacterized protein	RCAP_rcc01386	56	Unknown
	RCAP_rcc01387	D5AT26	Transcriptional regulator, RpiR family	RCAP_rcc01387	285	Cytoplasmic					carbohydrate derivative metabolic process [GO:1901135]	carbohydrate derivative binding [GO:0097367]; DNA binding [GO:0003677]; DNA-binding transcription factor activity [GO:0003700]		IPR009057;IPR000281;IPR001347;IPR011991	Homeodomain-like;HTH_RpiR;SIS;WHTH_DNA-bd_dom
*	RCAP_rcc01388	D5AT27	Putrescine-binding periplasmic protein	potD2	340	Periplasmic					polyamine transport [GO:0015846]	polyamine binding [GO:0019808]	periplasmic space [GO:0042597]	IPR001188	Sperm_putr-bd	ko02010
*	RCAP_rcc01389	D5AT28	Polyamine ABC transporter, ATP binding protein PotA-2 (EC 3.6.3.31)	potA2	358	Cytoplasmic Membrane						ATP binding [GO:0005524]; polyamine-transporting ATPase activity [GO:0015417]	ATP-binding cassette (ABC) transporter complex [GO:0043190]	IPR003593;IPR003439;IPR017871;IPR008995;IPR027417;IPR013611	AAA+_ATPase;ABC_transporter-like;ABC_transporter_CS;Mo/tungstate-bd_C_term_dom;P-loop_NTPase;Transp-assoc_OB_typ2	ko02010
	RCAP_rcc01390	D5AT29	Polyamine ABC transporter, permease protein PotB-2	potB2	293	Cytoplasmic Membrane					transmembrane transport [GO:0055085]		integral component of membrane [GO:0016021]; plasma membrane [GO:0005886]	IPR000515	MetI-like	ko02010
	RCAP_rcc01391	D5AT30	Polyamine ABC transporter, permease protein PotC-1	potC1	275	Cytoplasmic Membrane					transmembrane transport [GO:0055085]		integral component of membrane [GO:0016021]; plasma membrane [GO:0005886]	IPR000515	MetI-like	ko02010
*	RCAP_rcc01392	D5AT31	Peptidase, S58 family (EC 3.4.11.-)	RCAP_rcc01392	352	Unknown						aminopeptidase activity [GO:0004177]		IPR016117;IPR005321	ArgJ-like_dom;Peptidase_S58_DmpA
	RCAP_rcc01393	D5AT32	Two component transcriptional regulator, LuxR family	RCAP_rcc01393	229	Cytoplasmic					phosphorelay signal transduction system [GO:0000160]; regulation of transcription, DNA-templated [GO:0006355]	DNA binding [GO:0003677]		IPR011006;IPR016032;IPR001789;IPR000792;IPR011991	CheY-like_superfamily;Sig_transdc_resp-reg_C-effctor;Sig_transdc_resp-reg_receiver;Tscrpt_reg_LuxR_C;WHTH_DNA-bd_dom
	RCAP_rcc01394	D5AT33	Uncharacterized protein	RCAP_rcc01394	127	Unknown
*	RCAP_rcc01395	D5AT34	Pentapeptide repeat family protein	RCAP_rcc01395	216	Extracellular								IPR001646	5peptide_repeat
	RCAP_rcc01396	D5AT35	Quinoprotein ethanol dehydrogenase-1	exaA1	622	Periplasmic	TIGR03075;	136	Protein synthesis	Other		calcium ion binding [GO:0005509]; ethanol:cytochrome c oxidoreductase activity [GO:0052935]	membrane [GO:0016020]; outer membrane-bounded periplasmic space [GO:0030288]	IPR018391;IPR017512;IPR002372;IPR027295;IPR011047;IPR001479	PQQ_beta_propeller_repeat;PQQ_MeOH/EtOH_DH;PQQ_repeat;Quinonprotein_ADH-like_fam;Quinonprotein_ADH-like_supfam;Quinoprotein_DH_CS	ko00010;ko00625;ko00640
	RCAP_rcc01397	D5AT36	Metallo-beta-lactamase family protein	RCAP_rcc01397	325	Unknown	TIGR04558;	703	Unknown function	Enzymes of unknown specificity				IPR001279;IPR030811;IPR006311	Beta-lactamas-like;SoxH_rel_PQQ_1;TAT_signal
	RCAP_rcc01398	D5AT37	Uncharacterized protein	RCAP_rcc01398	258	Unknown	TIGR04557;	703	Unknown function	Enzymes of unknown specificity				IPR030831;IPR013783;IPR014756	Fuse_rel_SoxYZ;Ig-like_fold;Ig_E-set
	RCAP_rcc01399	D5AT38	Rhodanese domain protein (EC 2.8.1.-)	RCAP_rcc01399	185	Unknown	TIGR03865;	144	Transport and binding proteins	Carbohydrates, organic alcohols, and acids		transferase activity [GO:0016740]		IPR022376;IPR001763	PQQ_CXXCW;Rhodanese-like_dom
	RCAP_rcc01400	D5AT39	Histidine kinase (EC 2.7.13.3)	RCAP_rcc01400	434	Cytoplasmic Membrane						ATP binding [GO:0005524]; phosphorelay sensor kinase activity [GO:0000155]; protein dimerization activity [GO:0046983]	integral component of membrane [GO:0016021]	IPR003660;IPR003594;IPR011712	HAMP_linker_domain;HATPase_C;Sig_transdc_His_kin_sub3_dim/P	ko02020
	RCAP_rcc01401	D5AT40	Transcriptional regulator, AraC family	RCAP_rcc01401	363	Cytoplasmic						DNA-binding transcription factor activity [GO:0003700]; sequence-specific DNA binding [GO:0043565]		IPR029062;IPR025628;IPR009057;IPR018060;IPR018062;IPR020449	Class_I_gatase-like;DJ-1_InhA;Homeodomain-like;HTH_AraC;HTH_AraC-typ_CS;Tscrpt_reg_HTH_AraC-type
*	RCAP_rcc01402	D5AT41	ABC transporter, substrate-binding protein	RCAP_rcc01402	329	Unknown								IPR015168	SsuA/THI5	ko02010
*	RCAP_rcc01403	D5AT42	ABC transporter, permease protein	RCAP_rcc01403	274	Cytoplasmic Membrane					transmembrane transport [GO:0055085]		integral component of membrane [GO:0016021]; plasma membrane [GO:0005886]	IPR000515	MetI-like	ko02010
*	RCAP_rcc01404	D5AT43	ABC transporter, ATP-binding protein (EC 3.6.3.-)	RCAP_rcc01404	264	Cytoplasmic Membrane						ATPase activity [GO:0016887]; ATP binding [GO:0005524]		IPR003593;IPR003439;IPR017871;IPR027417	AAA+_ATPase;ABC_transporter-like;ABC_transporter_CS;P-loop_NTPase	ko02010
	RCAP_rcc01405	D5AT44	Uncharacterized protein	RCAP_rcc01405	62	Unknown
	RCAP_rcc01406	D5AT45	Lysozyme (EC 3.2.1.17)	RCAP_rcc01406	189	Unknown					cell wall macromolecule catabolic process [GO:0016998]; cytolysis [GO:0019835]; defense response to bacterium [GO:0042742]; peptidoglycan catabolic process [GO:0009253]	lysozyme activity [GO:0003796]		IPR002196;IPR023346;IPR023347	Glyco_hydro_24;Lysozyme-like_dom;Lysozyme_dom
	RCAP_rcc01407	D5AT46	Uncharacterized protein	RCAP_rcc01407	43	Unknown							integral component of membrane [GO:0016021]
	RCAP_rcc01408	D5AT47	Membrane protein, putative	RCAP_rcc01408	116	Cytoplasmic Membrane							integral component of membrane [GO:0016021]
	RCAP_rcc01409	D5AT48	Uncharacterized protein	RCAP_rcc01409	208	Unknown	TIGR02217;	152	Mobile and extrachromosomal element functions	Prophage functions				IPR011740	DUF2460
	RCAP_rcc01410	D5AT49	Uncharacterized protein	RCAP_rcc01410	813	Cytoplasmic Membrane							integral component of membrane [GO:0016021]	IPR006431	Phage_lambda_GpH_tape_meas_C
	RCAP_rcc01412	D5AT50	Uncharacterized protein	RCAP_rcc01412	111	Unknown
	RCAP_rcc01413	D5AT51	Uncharacterized protein	RCAP_rcc01413	298	Unknown
	RCAP_rcc01414	D5AT52	Uncharacterized protein	RCAP_rcc01414	140	Unknown
*	RCAP_rcc01415	D5AT53	Serine/threonine-protein kinase (EC 2.7.11.1)	RCAP_rcc01415	317	Cytoplasmic Membrane						ATP binding [GO:0005524]; protein kinase activity [GO:0004672]		IPR011009;IPR000719;IPR017441;IPR008271	Kinase-like_dom;Prot_kinase_dom;Protein_kinase_ATP_BS;Ser/Thr_kinase_AS
	RCAP_rcc01416	D5AT54	Uncharacterized protein	RCAP_rcc01416	207	Unknown
	RCAP_rcc01417	D5AT55	Uncharacterized protein	RCAP_rcc01417	107	Unknown
	RCAP_rcc01418	D5AT56	Uncharacterized protein	RCAP_rcc01418	420	Extracellular
	RCAP_rcc01419	D5AT57	Uncharacterized protein	RCAP_rcc01419	164	Cytoplasmic								IPR005564	Major_head_GpE
	RCAP_rcc01420	D5AT58	Peptidase, S49 family (EC 3.4.21.-)	RCAP_rcc01420	316	Unknown						peptidase activity [GO:0008233]		IPR029045;IPR007110;IPR002142	ClpP/crotonase-like_dom;Ig-like_dom;Peptidase_S49
	RCAP_rcc01421	P52967	Flavodoxin	nifF	182	Cytoplasmic Membrane	TIGR01752;	112	Energy metabolism	Electron transport	nitrogen fixation [GO:0009399]	electron transfer activity [GO:0009055]; FMN binding [GO:0010181]		IPR001094;IPR008254;IPR001226;IPR010086;IPR029039	Flavdoxin;Flavodoxin/NO_synth;Flavodoxin_CS;Flavodoxin_lc;Flavoprotein-like
	RCAP_rcc01422	D5AT60	Uncharacterized protein	RCAP_rcc01422	150	Unknown
*	RCAP_rcc01423	D5AT61	Uncharacterized protein	RCAP_rcc01423	62	Unknown
	RCAP_rcc01424	D5AT62	Uncharacterized protein	RCAP_rcc01424	73	Unknown								IPR019600	Hemin_uptake_protein_HemP
	RCAP_rcc01425	D5AT63	Uncharacterized protein	RCAP_rcc01425	178	Unknown								IPR009078	Ferritin-like_SF
	RCAP_rcc01426	D5AT64	ABC transporter, ATP-binding/permease protein (EC 3.6.3.-)	RCAP_rcc01426	605	Cytoplasmic Membrane						ATPase activity, coupled to transmembrane movement of substances [GO:0042626]; ATP binding [GO:0005524]	integral component of membrane [GO:0016021]	IPR003593;IPR011527;IPR003439;IPR017871;IPR027417	AAA+_ATPase;ABC1_TM_dom;ABC_transporter-like;ABC_transporter_CS;P-loop_NTPase
	RCAP_rcc01427	D5AT65	ABC transporter, ATP-binding/permease protein (EC 3.6.3.-)	RCAP_rcc01427	580	Cytoplasmic Membrane						ATPase activity, coupled to transmembrane movement of substances [GO:0042626]; ATP binding [GO:0005524]	integral component of membrane [GO:0016021]	IPR003593;IPR011527;IPR003439;IPR017871;IPR027417	AAA+_ATPase;ABC1_TM_dom;ABC_transporter-like;ABC_transporter_CS;P-loop_NTPase
	RCAP_rcc01428	D5AT66	Major facilitator superfamily MFS_1	RCAP_rcc01428	421	Cytoplasmic Membrane					transmembrane transport [GO:0055085]		integral component of membrane [GO:0016021]	IPR011701;IPR020846	MFS;MFS_dom
	RCAP_rcc01429	D5AT67	TonB-dependent receptor	RCAP_rcc01429	737	Outer Membrane							cell outer membrane [GO:0009279]	IPR030150;IPR012910;IPR000531	FyuA/ViuA;Plug;TonB-dep_rcpt_b-brl
	RCAP_rcc01430	D5AT68	O-methyltransferase domain protein (EC 2.1.1.-)	RCAP_rcc01430	278	Cytoplasmic					tetracenomycin C biosynthetic process [GO:1901106]	methyltransferase activity [GO:0008168]		IPR007213;IPR029063;IPR016874	LCM_MeTrfase;SAM-dependent_MTases;TcmP
	RCAP_rcc01431	D5AT69	Transcriptional regulator, AraC family	RCAP_rcc01431	333	Cytoplasmic						DNA-binding transcription factor activity [GO:0003700]; sequence-specific DNA binding [GO:0043565]		IPR009057;IPR018060;IPR018062	Homeodomain-like;HTH_AraC;HTH_AraC-typ_CS
	RCAP_rcc01432	D5AT70	Transcriptional regulator, AraC family	RCAP_rcc01432	299	Cytoplasmic Membrane						DNA-binding transcription factor activity [GO:0003700]; sequence-specific DNA binding [GO:0043565]		IPR009057;IPR018060;IPR018062	Homeodomain-like;HTH_AraC;HTH_AraC-typ_CS
	RCAP_rcc01433	D5AT71	TonB-dependent siderophore receptor	RCAP_rcc01433	710	Outer Membrane	TIGR01783;	145	Transport and binding proteins	Cations and iron carrying compounds	siderophore transport [GO:0015891]	iron ion binding [GO:0005506]; signaling receptor activity [GO:0038023]	cell outer membrane [GO:0009279]	IPR012910;IPR000531;IPR010105	Plug;TonB-dep_rcpt_b-brl;TonB_sidphr_rcpt
	RCAP_rcc01434	D5AT72	Ferric enterobactin-binding periplasmic protein FepB-1	fepB1	328	Unknown								IPR002491	ABC_transptr_periplasmic_BD	ko02010
	RCAP_rcc01435	D5AT73	Ferric enterobactin transport system permease protein FepD-1	fepD1	342	Cytoplasmic Membrane						transporter activity [GO:0005215]	integral component of membrane [GO:0016021]; plasma membrane [GO:0005886]	IPR029022;IPR000522	ABC_BtuC-like;ABC_transptr_permAse	ko02010
	RCAP_rcc01436	D5AT74	Ferric enterobactin transport system permease protein FepG-1	fepG1	343	Cytoplasmic Membrane						transporter activity [GO:0005215]	integral component of membrane [GO:0016021]; plasma membrane [GO:0005886]	IPR029022;IPR000522	ABC_BtuC-like;ABC_transptr_permAse	ko02010
	RCAP_rcc01437	D5AT75	Ferric enterobactin transport ATP-binding protein FepC-1 (EC 3.6.3.34)	fepC1	271	Cytoplasmic Membrane						ATP binding [GO:0005524]; ferric dicitrate transporter activity [GO:0102026]; iron-chelate-transporting ATPase activity [GO:0015623]	cell [GO:0005623]	IPR003593;IPR003439;IPR017871;IPR027417	AAA+_ATPase;ABC_transporter-like;ABC_transporter_CS;P-loop_NTPase	ko02010
	RCAP_rcc01438	D5AT76	Siderophore-interacting protein	RCAP_rcc01438	344	Unknown						oxidoreductase activity [GO:0016491]		IPR013113;IPR017927;IPR017938;IPR007037	FAD-bd_9_SIP;Fd_Rdtase_FAD-bd;Riboflavin_synthase-like_b-brl;SIP
[truncated: 2,215 more rows]

## Sheet: IdentifiedProteins
Gene names (ordered locus )	Uniprot Entry	Uniprot Protein name	Gene name (Uniprot)	Length	Mol. weight [kDa]	PsortB Database Final_Localization	# Unique Peptides	MS/MS count	Sequence coverage [%]
RCAP_rcc00001	D5AUY7	Chromosomal replication initiator protein DnaA	dnaA	457	51.562	Cytoplasmic	16	139	40.9
[truncated: 2,429 more rows]

## Sheet: UnidentifiedProteins
Gene names (ordered locus )	Uniprot Entry	Uniprot Protein name	Gene name	Length	PsortB Database Final_Localization	TIGRFAM	TIGRFAM Role ID	TIGR Main Role	TIGR Sub Role
[truncated: 1,202 more rows]

[truncated: 2 more sheets: SinglePeptide-ID, Quantified-Statistics]
